# Supplementary material
Source: Royal Society of Chemistry journal article supplement (doi:10.1039/d5np00020c)
Supplement: d5np00020c1.xlsx [file d5np00020c1.xlsx]

## Sheet: Domain organization counts
Domains	Freq	CLASS
ECH-KS-AT-DH-ER-KR-xCP	1	HR
ER-KS-AT-DH-ER-KR-xCP	1	HR
KR-KS-AT-DH-MT-ER-KR-xCP	1	HR
KR-xCP-KS-AT-DH-ER-MT-KR-xCP-xCP-xCP-xCP-KS	1	HR
KS-AT-DH-ER-KR-C-A-xCP-Red	1	HR
KS-AT-DH-ER-KR-xCP-C	1	HR
KS-AT-DH-ER-KR-xCP-cAT	1	HR
KS-AT-DH-ER-KR-xCP-cAT-Atg	1	HR
KS-AT-DH-ER-KR-xCP-C-Red	1	HR
KS-AT-DH-ER-KR-xCP-ER	1	HR
KS-AT-DH-ER-KR-xCP-LPG_synthase_C	1	HR
KS-AT-DH-ER-KR-xCP-xCP	1	HR
KS-AT-DH-KR-xCP-KS-AT-DH-MT-ER-KR-xCP	1	HR
KS-AT-DH-MT-ER-KR-xCP-ER	1	HR
KS-AT-DH-MT-KR-xCP-C-A-xCP-Red-ER	1	HR
TauD-KS-AT-DH-MT-ER-KR-xCP	1	HR
Te-KS-AT-DH-ER-KR-xCP	1	HR
xCP-KS-KR-xCP-KS-AT-DH-ER-MT-KR	1	HR
xCP-xCP-xCP-xCP-KS-DH-ER-MT-KR-xCP-xCP-KS-AT-DH-MT-KR-xCP-KS-KR-xCP-KS	1	HR
KS-AT-ER-KR-xCP-C-A-xCP-Red	1	HR
KS-AT-ER-xCP-cAT	1	HR
KS-AT-MT-ER-KR-xCP-KR	1	HR
KS-AT-MT-ER-KR-xCP-Te	1	HR
KS-AT-MT-ER-xCP	1	HR
A-KS-AT-DH-ER-xCP	1	HR
A-KS-AT-DH-ER-KR-xCP	2	HR
Atg_2-KS-AT-DH-MT-ER-KR-xCP	2	HR
Atg-KS-AT-DH-ER-KR-xCP	2	HR
ER-KS-AT-DH-KR-xCP	2	HR
ER-KS-AT-DH-MT-KR-xCP-Red	2	HR
KS-AT-DH-ER-KR-xCP-KR	2	HR
KS-AT-DH-MT-ER-KR-xCP-A	2	HR
KS-AT-DH-MT-ER-KR-xCP-KR	2	HR
KS-KS-AT-DH-ER-KR-xCP	2	HR
Red-KS-AT-DH-MT-ER-KR-xCP	2	HR
ER-KS-AT-MT-KR-xCP	2	HR
KS-AT-ER-KR-C-A-xCP-Te	2	HR
KS-AT-ER-xCP	2	HR
KS-AT-DH-ER-KR-xCP-Red	3	HR
KS-AT-DH-MT-ER-KR-xCP-cAT	3	HR
KS-AT-ER-KR-xCP-C-A-xCP-Te	3	HR
KS-AT-MT-ER-KR-xCP-Red	4	HR
KS-AT-DH-DH-MT-ER-KR-xCP	5	HR
KS-AT-DH-MT-ER-KR-xCP-xCP-C-A-xCP-Red	5	HR
ER-KS-AT-DH-MT-KR-xCP	5	HR
KS-AT-DH-MT-ER-KR-xCP-C-C-A-xCP-C	6	HR
MT-xCP-KS-AT-DH-MT-KR-xCP-KS-DH-ER-MT-KR-xCP	6	HR
xCP-KS-KR-xCP-KS-AT-DH-ER-MT-KR-xCP-xCP-xCP-xCP-KS-DH-ER-MT-KR-xCP-xCP-KS-AT-DH-MT-KR-xCP-KS-KR-xCP-KS	6	HR
KS-AT-DH-ER-KR-xCP-Te	7	HR
ER-KS-AT-DH-MT-KR-xCP-C-A-xCP-Red	8	HR
KS-AT-DH-MT-ER-xCP-cAT	8	HR
KS-AT-DH-DH-ER-KR-xCP	12	HR
KS-AT-DH-ER-KR-xCP	13	HR
KS-AT-DH-ER-KR-xCP-C	15	HR
KS-AT-DH-ER-KR-xCP-C-A-xCP	15	HR
KS-AT-DH-MT-ER-KR-xCP	15	HR
KS-AT-DH-ER-KR-xCP-Te	16	HR
KS-AT-ER-KR-xCP	16	HR
KS-AT-MT-ER-KR-xCP	27	HR
KS-AT-DH-ER-xCP	28	HR
KS-AT-DH-ER-xCP-cAT	29	HR
KS-AT-DH-MT-ER-KR-xCP-Red	33	HR
KS-AT-DH-MT-ER-xCP	35	HR
KS-AT-DH-ER-KR-xCP-cAT	64	HR
KS-AT-DH-MT-ER-KR-xCP-cAT	129	HR
KS-AT-DH-ER-KR-xCP-C-A-xCP-Red	141	HR
KS-AT-DH-ER-KR-xCP	2440	HR
KS-AT-DH-MT-ER-KR-xCP	3436	HR
KS-AT-MT-Red	1	NR
KS-AT-MT-xCP	1	NR
KS-AT-PT-xCP-xCP-xCP	1	NR
KS-AT-xCP-A-xCP-C-A	1	NR
KS-AT-xCP-C-A-xCP	1	NR
KS-AT-xCP-C-A-xCP-A-xCP-C-C-xCP	1	NR
KS-AT-xCP-C-A-xCP-C-A-C	1	NR
KS-AT-xCP-C-A-xCP-C-A-xCP	1	NR
KS-AT-xCP-C-A-xCP-Red	1	NR
KS-AT-xCP-MT-Red-MT-KR-xCP-C	1	NR
KS-AT-xCP-xCP-Red	1	NR
KS-AT-xCP-xCP-xCP	1	NR
A-KS-AT-xCP-xCP-xCP	1	NR
AT-KS-AT-PT-xCP-xCP	1	NR
A-xCP-KS-AT-xCP-MT	1	NR
A-xCP-KS-AT-xCP-Red	1	NR
KS-AT-DH-C-A-xCP-Red	1	NR
KS-AT-PT-xCP-xCP-MT	2	NR
KS-AT-xCP-xCP-xCP-MT	2	NR
A-KS-AT-xCP	2	NR
A-xCP-KS-AT-xCP-xCP-Red	2	NR
xCP-KS-AT-KR-xCP-Red	3	NR
A-KS-AT-xCP-xCP	3	NR
A-MT-xCP-KS-AT-xCP	4	NR
A-xCP-KS-AT	4	NR
CAL_domain-xCP-KS-AT-xCP	4	NR
C-A-xCP-KS-AT-xCP	4	NR
KS-AT-xCP-xCP-Te	6	NR
KS-AT-xCP-xCP	7	NR
KS-AT-PT-xCP-xCP-Red	8	NR
KS-AT-PT-xCP-xCP-Te-MT	9	NR
KS-AT-xCP-Te	9	NR
KS-AT-PT-xCP-xCP	13	NR
KS-AT-xCP-xCP-MT	15	NR
KS-AT-xCP-xCP-MT-Red	19	NR
A-xCP-KS-AT-xCP	26	NR
KS-AT-xCP	26	NR
KS-AT-PT-xCP	50	NR
KS-AT-PT-xCP-Te	56	NR
KS-AT-xCP-Red	64	NR
KS-AT-xCP-MT	78	NR
KS-AT-PT-xCP-xCP-Te	106	NR
KS-AT-xCP-MT-Red	172	NR
MT-xCP-KS-AT-DH-MT-KR-xCP	1	PR
xCP-KS-AT-DH-KR-xCP-Red	1	PR
KS-AT-KR-C-xCP-Red	1	PR
KS-AT-KR-xCP-C	1	PR
KS-AT-KR-xCP-cAT	1	PR
KS-AT-KR-xCP-Te	1	PR
KS-AT-MT-KR-Red	1	PR
KS-AT-MT-KR-xCP-A-xCP-Red	1	PR
KS-AT-MT-KR-xCP-C-A-Red	1	PR
KS-AT-MT-KR-xCP-xCP	1	PR
KS-AT-MT-MT-KR-xCP	1	PR
KS-AT-PS-KR-xCP	1	PR
A-KS-AT-DH-KR-xCP	1	PR
A-KS-AT-KR-xCP	1	PR
A-Red-KS-AT-DH-xCP-MT	1	PR
A-Red-KS-AT-DH-xCP-xCP-MT	1	PR
A-xCP-KS-AT-DH-KR-xCP-xCP	1	PR
A-xCP-KS-AT-KR-xCP	1	PR
A-xCP-KS-AT-MT-KR-xCP-Te	1	PR
CAL_domain-xCP-KS-AT-DH-KR-xCP-Te	1	PR
ECH-KS-AT-DH-KR-xCP	1	PR
KR-KS-AT-DH-xCP-xCP-MT	1	PR
KR-KS-AT-DH-xCP-xCP-xCP-MT-Te	1	PR
KS-AT-DH-KR-xCP-C-A-Red	1	PR
KS-AT-DH-KR-xCP-cAT	1	PR
KS-AT-DH-KR-xCP-C-A-xCP	1	PR
KS-AT-DH-MT-KR-C-A	1	PR
KS-AT-DH-MT-KR-xCP-A	1	PR
KS-AT-DH-MT-KR-xCP-A-Red	1	PR
KS-AT-DH-MT-KR-xCP-A-xCP	1	PR
KS-AT-DH-MT-KR-xCP-C-A-xCP-Red-KR-xCP	1	PR
KS-AT-DH-MT-KR-xCP-xCP-Red	1	PR
KS-AT-DH-MT-xCP-C-A-Red	1	PR
KS-AT-DH-MT-xCP-cAT	1	PR
KS-AT-DH-xCP-MT-Red	1	PR
KS-AT-DH-xCP-xCP-MT-A-xCP-C	1	PR
Te-KS-AT-DH-MT-KR-xCP-C-A-xCP	2	PR
KS-AT-MT-KR-xCP	2	PR
KS-AT-MT-KR-xCP-C-A-xCP-Red	2	PR
A-xCP-KS-AT-DH-KR-xCP-Te	2	PR
A-xCP-Red-KS-AT-DH-xCP-xCP-MT	2	PR
KR-KS-AT-DH-xCP-xCP-MT	2	PR
KR-KS-AT-DH-xCP-xCP-Te	2	PR
KR-KS-AT-xCP-xCP-MT	2	PR
KS-AT-DH-KR-xCP-A-xCP-Red	2	PR
KS-AT-DH-KR-xCP-C-A	2	PR
KS-AT-DH-MT-KR-xCP-cAT	2	PR
KS-AT-DH-MT-KR-xCP-C-Red	2	PR
KS-AT-DH-MT-KR-xCP-C-xCP-Red	2	PR
KS-AT-DH-MT-xCP-A	2	PR
KS-AT-DH-xCP-Red	2	PR
KS-AT-DH-xCP-xCP-xCP-MT	2	PR
KS-AT-DH-xCP-xCP-xCP-MT	2	PR
A-Red-KS-AT-DH-xCP	3	PR
A-xCP-KS-AT-DH-KR-xCP	3	PR
KR-KS-AT-DH-xCP-xCP-Te	3	PR
KS-AT-DH-KR-C-A-xCP-Red	3	PR
KS-AT-DH-KR-xCP-Te	3	PR
KS-AT-DH-MT-KR-xCP-C-A-xCP	3	PR
KS-AT-DH-MT-KR-xCP-xCP	3	PR
KS-AT-DH-xCP-C-A-xCP	3	PR
KS-AT-DH-xCP-Te	3	PR
KS-AT-DH-xCP-Te	3	PR
KS-AT-DH-xCP-xCP	3	PR
KS-AT-DH-xCP-xCP-Te	3	PR
KS-AT-MT-KR-xCP-C	4	PR
KR-KS-AT-xCP-xCP-MT-Te	4	PR
KS-AT-DH-MT-KR-xCP-C-A-Red	4	PR
KS-AT-DH-MT-KR-xCP-Te	4	PR
KS-AT-DH-xCP-xCP-Te	4	PR
KR-KS-AT-DH-xCP-xCP-MT-Te	5	PR
KS-AT-DH-KR-xCP-A	5	PR
KS-AT-DH-MT-KR-xCP-A-xCP-Red	5	PR
KS-AT-DH-xCP-MT-Red	5	PR
KS-AT-DH-xCP-xCP-MT-Te	5	PR
KS-AT-DH-MT-KR-xCP	6	PR
KS-AT-DH-MT-KR-xCP-C	6	PR
KS-AT-KR-xCP-C-A-xCP-Red	7	PR
KS-AT-KR-xCP-Red	7	PR
KS-AT-DH-KR-Red	7	PR
KS-AT-DH-KR-xCP-C	7	PR
KS-AT-DH-xCP-xCP	7	PR
KS-AT-DH-xCP-xCP-MT-Red	8	PR
KS-AT-DH-KR-xCP-C-A-xCP	10	PR
KS-AT-DH-MT-KR-xCP-C-A	10	PR
KS-AT-DH-MT-KR-xCP-C-A-xCP-Red	10	PR
KS-AT-DH-xCP-C-A-xCP-Red	10	PR
KS-AT-DH-KR-xCP	14	PR
KS-AT-DH-MT-xCP	15	PR
KS-AT-DH-KR-xCP-Red	18	PR
KS-AT-DH-xCP	19	PR
KS-AT-KR-xCP	26	PR
KR-KS-AT-DH-xCP-xCP-MT-Te	26	PR
KS-AT-DH-KR-xCP-Red	29	PR
KS-AT-DH-MT-KR-C-A-xCP-Red	29	PR
KS-AT-DH-xCP	32	PR
KS-AT-DH-xCP-xCP-MT	35	PR
KS-AT-DH-xCP-xCP-MT	52	PR
KS-AT-DH-MT-KR-xCP-C-A-xCP	59	PR
KS-AT-DH-xCP-MT	59	PR
KS-AT-DH-xCP-MT	68	PR
A-xCP-KS-AT-KR-xCP-Red	83	PR
KS-AT-DH-MT-KR-xCP-Red	103	PR
KS-AT-DH-MT-KR-xCP-C	110	PR
KS-AT-DH-KR-xCP-C-A-xCP-Red	176	PR
KS-AT-DH-MT-KR-xCP	425	PR
KS-AT-DH-KR-xCP	567	PR
KS-AT-DH-MT-KR-xCP-C-A-xCP-Red	944	PR
AT-AT-SAT-KS-AT-PT-xCP-xCP-Te	1	SAT
Atg-SAT-KS-AT-PT-xCP-Te	1	SAT
A-xCP-Red-SAT-KS-AT-DH	1	SAT
A-xCP-SAT-KS-AT-DH-xCP-xCP-MT	1	SAT
KR-A-xCP-Red-SAT-KS-AT-DH-xCP-MT	1	SAT
KS-SAT-KS-AT-PT-xCP-Te	1	SAT
KS-SAT-KS-AT-PT-xCP-Te	1	SAT
SAT-KS-AT-DH-Red	1	SAT
SAT-KS-AT-DH-xCP-A-xCP-C	1	SAT
SAT-KS-AT-DH-xCP-MT-Te-Atg	1	SAT
SAT-KS-AT-DH-xCP-xCP-xCP	1	SAT
SAT-KS-AT-PT-xCP-MT	1	SAT
SAT-KS-AT-xCP-MT-Red-ER-KR-xCP	1	SAT
SAT-KS-AT-xCP-MT-Red-KS-AT-DH-MT-ER-KR-xCP	1	SAT
SAT-KS-AT-xCP-MT-Red-Red	1	SAT
SAT-KS-AT-xCP-xCP-xCP	1	SAT
A-Red-SAT-KS-AT-DH-xCP	2	SAT
A-Red-SAT-KS-AT-DH-xCP-MT	2	SAT
A-Red-SAT-KS-AT-DH-xCP-xCP-MT	2	SAT
SAT-KS-AT-DH-xCP-xCP-MT-A-xCP-C	2	SAT
SAT-KS-AT-DH-xCP-xCP-xCP	2	SAT
SAT-KS-AT-PT-xCP-xCP-Te-Atg	2	SAT
SAT-KS-AT-DH-xCP-MT-Red	3	SAT
SAT-KS-AT-xCP-MT-ER-KR-xCP	3	SAT
SAT-KS-AT-DH-xCP-Te	4	SAT
SAT-KS-AT-xCP-xCP-Red	4	SAT
SAT-KS-AT-DH-xCP	5	SAT
SAT-KS-AT-PT-xCP-xCP-xCP-Red	5	SAT
SAT-KS-AT-xCP-Te	5	SAT
SAT-KS-AT-PT-xCP-xCP-Te-MT	6	SAT
SAT-KS-AT-xCP-xCP-MT	6	SAT
SAT-KS-AT-DH-xCP-xCP	7	SAT
SAT-KS-AT-DH-xCP-xCP-Te	7	SAT
SAT-KS-AT-DH-xCP-xCP-xCP-MT	12	SAT
SAT-KS-AT-PT-xCP-xCP-xCP-Te	13	SAT
SAT-KS-AT-DH-xCP-xCP	14	SAT
SAT-KS-AT-DH-xCP-xCP-Te	17	SAT
SAT-KS-AT-xCP-xCP-Te	18	SAT
SAT-KS-AT-DH-xCP	19	SAT
SAT-KS-AT-xCP	20	SAT
SAT-KS-AT-xCP-xCP	23	SAT
SAT-KS-AT-PT-xCP-xCP-xCP	26	SAT
SAT-KS-AT-DH-xCP-xCP-MT	30	SAT
SAT-KS-AT-xCP-Red	32	SAT
SAT-KS-AT-xCP-xCP-MT-Red	33	SAT
SAT-KS-AT-xCP-MT	42	SAT
SAT-KS-AT-DH-xCP-MT	50	SAT
SAT-KS-AT-PT-xCP-xCP	57	SAT
SAT-KS-AT-DH-xCP-MT	67	SAT
SAT-KS-AT-DH-xCP-xCP-MT	71	SAT
SAT-KS-AT-PT-xCP-xCP-Red	130	SAT
SAT-KS-AT-xCP-MT-Red	232	SAT
SAT-KS-AT-PT-xCP-Te	363	SAT
SAT-KS-AT-PT-xCP	606	SAT
SAT-KS-AT-PT-xCP-xCP-Te	1116	SAT

## Sheet: Frequency by type
	PKS class	Frequency
HR	HR others	438
HR	KS-AT-DH-MT-ER-KR-xCP-cAT	129
HR	KS-AT-DH-ER-KR-xCP-C-A-xCP-Red	141
HR	KS-AT-DH-ER-KR-xCP	2440
HR	KS-AT-DH-MT-ER-KR-xCP	3436
HR	Total	6584
NR	NR others	433
NR	KS-AT-PT-xCP-xCP-Te	106
NR	KS-AT-xCP-MT-Red	172
HR	Total	711
PR	PR others	810
PR	KS-AT-DH-MT-KR-xCP-Red	103
PR	KS-AT-DH-MT-KR-xCP-C	110
PR	KS-AT-DH-KR-xCP-C-A-xCP-Red	176
PR	KS-AT-DH-MT-KR-xCP	425
PR	KS-AT-DH-KR-xCP	567
PR	KS-AT-DH-MT-KR-xCP-C-A-xCP-Red	944
PR	Total	3135
SAT	SAT others	627
SAT	SAT-KS-AT-PT-xCP-xCP-Red	130
SAT	SAT-KS-AT-xCP-MT-Red	232
SAT	SAT-KS-AT-PT-xCP-Te	363
SAT	SAT-KS-AT-PT-xCP	606
SAT	SAT-KS-AT-PT-xCP-xCP-Te	1116
SAT	Total	3074

## Sheet: Frequency by taxonomy
Category	Dothidiomycetes	Eurotiomycetes	Lecanoromycetes	Leotiomycetes	Orbiliomycetes	Pezizomycetes	Sordariomycetes	Saccharomycetes	Schizosaccharomycetes	Ustilaginomycetes	Microbotryomycetes	Agaricomycetes	Tremellomycetes	Mucoromycetes	Chytridiomycetes
HR others	0.0635593	0.325581	0.766667	0.295082	0	0	0.188034	0	0	0	0	0	0	0	0.125
KS-AT-DH-MT-ER-KR-xCP-cAT	0.0381356	0.0813953	0.166667	0.409836	0	0.125	0.299145	0	0	0	0	0	0	0	0
KS-AT-DH-ER-KR-xCP-C-A-xCP-Red	0.0423729	0.321705	0.1	0.0491803	0	0	0.175214	0	0	0.0338983	0	0	0	0	0
KS-AT-DH-ER-KR-xCP	2.02542	3.00388	3.3	2.67213	2.8125	0.1875	3.7265	0	0	0	0	0.0070922	0	0	0
KS-AT-DH-MT-ER-KR-xCP	3.07627	5.18217	3.86667	2.78689	0.40625	0.3125	4.75214	0.00151515	0	0	0	0.0496454	0	0	0
NR others	0.144068	0.616279	0.366667	0.163934	0	0	0.448718	0.0030303	0	0.0338983	0	0.163121	0	0	0
KS-AT-PT-xCP-xCP-Te	0.0847458	0.189922	0.733333	0.0655738	0	0	0.217949	0	0	0	0	0.113475	0	0	0
KS-AT-xCP-MT-Red	0.0847458	0.434109	0.166667	0.0163934	0	0	0.226496	0	0	0	0	0	0	0	0
PR others	0.211864	0.434109	0.133333	0.180328	0	0	0.333333	0	0	0	0	0.361702	0	0	0
KS-AT-DH-MT-KR-xCP-Red	0.135593	0.100775	0.1	0.0655738	0	0	0.166667	0	0	0	0	0	0	0	0
KS-AT-DH-MT-KR-xCP-C	0.00847458	0.00775194	0	0	0	0	0.042735	0	0	0	0	0	0	0	0
KS-AT-DH-KR-xCP-C-A-xCP-Red	0.127119	0.422481	0.0333333	0.0163934	0.46875	0	0.102564	0	0	0	0	0	0	0	0
KS-AT-DH-MT-KR-xCP	0.29661	0.806202	0.366667	0.803279	0.125	0	0.367521	0	0	0	0	0.0851064	0	0	0
KS-AT-DH-KR-xCP	0.614407	0.596899	0.9	0.147541	0.65625	0	0.957265	0	0	0	0	0.148936	0	0	0
KS-AT-DH-MT-KR-xCP-C-A-xCP-Red	0.699153	1.20543	0.933333	0.967213	0.03125	0.0625	1.79915	0	0	0	0	0.0141844	0	0	0
SAT others	0.559322	0.569767	1.96667	0.868852	0	0	0.354701	0	0	0	0	0	0	0	0
SAT-KS-AT-PT-xCP-xCP-Red	0.144068	0.100775	0.266667	0.0819672	0	0.0625	0.260684	0	0	0	0	0	0	0	0
SAT-KS-AT-xCP-MT-Red	0.169492	0.593023	0.433333	0.229508	0	0	0.196581	0	0	0	0	0	0	0	0
SAT-KS-AT-PT-xCP-Te	1.70763	1.96124	4.46667	1.83607	0	0.875	1.25641	0	0	0	0	0	0	0	0
SAT-KS-AT-PT-xCP	0.728814	1.22481	0.9	0.770492	0	0	0.431624	0	0	0	0	0	0	0	0

## Sheet: PKS complete list
Class	Strain	Domain organization	Amino acid sequence
Dothideomycetes	Aaosphaeria_arxii_CBS_175.79_CBS_175.79_GCA_010015735.1	SAT-KS-AT-PT-xCP	MELIYISNEFLFDELPNIYRELHQRSKSRQHPILARFLRESTVAIREEVKQLPTELRQLVPTFESILTFVEFAELRKGALGGSADGILLAVAELGTLIAYYESNPSAFGRTDTNTYLAGLGIGLLATPAISLAATVADLPVIGAQVLRQAFRLGVFVNQVSENLQHRDPNDDGPLDSWAYVLPNVAPKNVQEQLDTIQKRESTPEAAKIFISAYSATSVTISGPPARLKTLFSTIEFFRDTRSIALPVYSGLCHAAHIYNEEHVRQIVRTPSMERINAQYTPRVPVFSTSTGKPYPAKTATELFEHIIYEIMTQAIQWDKVVEAVTQRAQKNAKAGAKVVLYRSSLPTIELAGALKKISGLNVSTQELGQWLNSKDPAINKELDPSNRDTLQSKIAIVG…
Dothideomycetes	Aaosphaeria_arxii_CBS_175.79_CBS_175.79_GCA_010015735.1	SAT-KS-AT-PT-xCP-xCP-Te	MNVFIFGDQTADQYPLLRKANVWKGNALLSNFLERTSVVLREEIQRLPKTQREQIPDFLRLSDLVEAYYAKGLKIPQIESSMVTIAQLAHYIGYFGENVQELPVPSNTRLLGLCTGLLAASIVASAKTLDELVPLAVEAVRISFRMGTCVGAVKDALEQPANANESWSTIIASISEKAANAAIAEFHQERRIVKSAQAYVSAVSVMAITVSGPPSTTKRLFEDSDAFSSNTRVPIPVYAPYHASHLYGEADIDRILGDEISDILCKFRPHSLIHSASTGICHTATNTLDLVKTVLAEILLEPVRWDNLLEECVSQVTAVSNNTCNITAIGVTNVANSLASALKAGGQSSVSIRDHTSWIAKTEDANGRTQNDKIAIVGMSGRFPSAASHEALWELLEKG…
Dothideomycetes	Aaosphaeria_pasadenensis_FJI_L9_BK_P1_GCA_022813625.1	SAT-KS-AT-PT-xCP	MELIYISNEFLFDELPNIYRELHQRSKSRQHPILARFLRESTVAIREEVKQLPTELRQLVPTFESILTFVEFAELRKGALGGSADGILLAVAELGTLIAYYESNPSAFGRTDTNTYLAGLGIGLLATPAISLAATVADLPVIGAQVLRQAFRLGVFVNQVSENLQHRDPNDDGPLDSWAYVLPNVAPKHVQEQLDTIQKRESTPEAAKIFISAYSATSVTISGPPARLKTLFSTIEFFRDTRSIALPVYSGLCHAAHIYNEEHVRQIVRTPSMERINAQYTPRVPVFSTSTGKPYPAKTATELFEHIIYEIMTQAIQWDKVVEAVTQRAQKNAKAGAKVVLYRSSLPTIELAGALKKISGLNVSTQELGQWLNSKDPAINKELDPSNRDTLQSKIAIVG…
Dothideomycetes	Aaosphaeria_pasadenensis_FJI_L9_BK_P1_GCA_022813625.1	SAT-KS-AT-PT-xCP-xCP-Te	MNVFIFGDQTADQYPLLRKANVWKGNALLSNFLERTSVVLREEIQRLPKTQREQIPDFLRLSDLVEAYYAKGLKIPQIESSMVTIAQLAHYIGYFGENVQELPVPSNTRLLGLCTGLLAASIVASAKTLDELVPLAVEAVRISFRMGTCVGAVKDSLEQPANANESWSTIIASISEKAANAAIAEFHQERRIVKSAQAYVSAVSVMAITVSGPPSTTKRLFEDSDAFSSNTRVPIPVYAPYHASHLYGEADIDRILGDEISDILCNFRPHSLIHSASTGICHTATNTLDLVKTVLAEILLEPVRWDNLLEECVSQVTAVSNNTCNITAIGVTNVANSLASALKAGGQSSVSIRDHTAWIAKTEDANGRTQNDKIAIVGMSGRFPSAASHEALWELLEKG…
Lecanoromycetes	Acarospora_socialis_JNA_AS_CCGP158_GCA_025617375.2	SAT-KS-AT-DH-xCP-MT	MSSLATDSPPSLLVFGPQTEFPPEKVLQDCRQELISSPRLSALEEAVDDLPQFWQGLVDFDPSLRQVPGAKYLGHLKQWVKDGGPFPHQQSNSPNHYALAVTVLLQITQYTRYLDQLGKDSHRKVLNSVKAGGGVQGFCVGFLSAVAVASSGSEVDLGASAAIALRLAVCIGAYVDQDGAYAPVATEYMAVAIRWREGNADDKAEVAKIIRSIPNVYISSVNDDASVTVTIRAADLDGLTAKAREKNLHTKAVHVYGRFHTPNHSRAVDKLTKMALLSKGLQFPDTKELQVPICGTADGEIISGGSLTQLALENTLVNVADWYATLRSSIQQLPKSNQTIAIAGFGNLEGSKPKLGEGLTDGHVNGHVNGINGVHRIDNSNDLSQYPSHSIAIVGMAGR…
Lecanoromycetes	Acarospora_socialis_JNA_AS_CCGP158_GCA_025617375.2	SAT-KS-AT-DH-xCP-xCP	MPPPPSLVAFGSLTLWPTADQLQQLSKALRQQPDLSQLVTAIRDLASLWKALLDKDPDLDKVPGQVATEQLARWVDTGDVAKIDDPQPNIMTMPMTIIAHIVQYLGYLQQPGETISHLEVLESVTANGGVQGFCAGMLTALAVASARDEGEIGLAAATSIRLALCIGAYIDLDGRRDQGTLEASSLAIRWKSPASLETVQQVLENHPHILEACGLYSDTHFGHKSLVRSNTDGQVIPEDDAALVALRCIMVDRANWYLTISSAASSMRQTHGHPFIMSFGADSIPPSISKTVKVVKAPTTIVHFSSTTLSELNAPQLEIKLPSTLRYPENAIAVIGMSCKFPGADSLDEFWQLLADGTSMLEEMPKQRFSSTGRYRSPGVKLRFWGNFVRDIDAFDHRF…
Lecanoromycetes	Acarospora_socialis_JNA_AS_CCGP158_GCA_025617375.2	SAT-KS-AT-PT-xCP	MVNDLNTKLVFFSNEFPNDDLQELFRRLQRHSKDKKFRYLAAFLEECTAVVKDEALKLPQQLQDLIPHFNTVLTLADHGDFRQGPLGAAMESAILCVLEIGMLIGHYEGQNLEYDLPTGSTTLAGLSIGLLSGAAVALATSLADLAHTGAESVRIAFRLGVYVDEISRKLEPREADANLESWAYVVAEMSAEDVQKEIDRYNADTSNPELTKVFISAADKSSVSVSGPPSRLKKAFQHSQVLRYSKFLPLPVYDGLCHAPHLYSVDDINFVINGSEPKVSRSRRVQLPLLSSQTGTPFPAKRAGDLFEQIATELLTGTIYLDNVTAGILTNLADSGMPECQVGLFRMSLVTKGLLSSIESDFPQLKLTRHDLIDWVTKDFGTRIPRSPKQSKLAVVGMA…
Lecanoromycetes	Acarospora_socialis_JNA_AS_CCGP158_GCA_025617375.2	SAT-KS-AT-PT-xCP-xCP-Te	MTMASPSHALLFPHEHTDVLGALHDLSVRSKTRPQLRAFLASSSAVVHEQAVAVDGPERASIGSFEDLVELAQRHVSRQRHNVVVEMVLLTTIQISQLLVLAEDDPSILSDTSVPVGFGIGLIAAAVAATASNANSVAKLGLEGVAVAFRLAVESQRASRDIEESDGTWARVVSSCKLEEVQQRLDKANVTLRPLYQAYVGQVLPGSLVVFGPPSTLDTLAKMSDLARSITSTPTPSKCLMYGSHLPPVDTAKILCVSPVREACTVQRSLYSVHSPAGSLSAGTFGELLRLTVSEIAHKSMQVEETFRTVATALQKTGSSEVVLMTVGSTWDASPLQDIFHQHDQNVRIGEFSPCPKPFGDDLSSIPSDAIAVVGMSGRFPESDTLDELWRLLETGTTT…
Dothideomycetes	Acidomyces_sp._richmondensis_FRIK2901_GCA_003545705.1	SAT-KS-AT-PT-xCP-xCP	MSNVLLFGDQTAEQYPLLHKIVLRKENALVRSFVEQVSRALREETRLLPRSQRDQIPDFLTVNDLKEAYYQKGTKVPMLESALVTITQLGHYIGYFSEHPNELPAASNTRVLGLCTGLLAAAAVVSARTVEELVPLGVQFVRLAFRSGAVVDSVRTALSQVGEEKAPWSTIVTGTTEQVAKEALAAFHKEKGIPQSSQAYISAVSVMAITVSGPPTTVKRFFEESPVLSKNHRVPIPVYGPYHAEHLYGPADFDKMLSGTVSEQLRKYQPASLVHSAYSGKPIVADNALDLAKVALSEMLQLPVRWDYLLEETVSQMTANKFPSKIYAMGVSNVANSLISALKAGGKTDVTAVDQSAWEEAQEFTKGRTQNDKIAIIGMAGRFPNAANHEALWDLLMKG…
Agaricomycetes	Agaricus_bisporus_A10_9_GCA_041430195.1	A-Red-KS-AT-DH-xCP	MTANGINGHGANGVNGTNGTNGHHETNGVNGSHIVPFVKPKVNFASAERLEGCIHSLPELVDFNSLNNSNHTFCVQAKSNEPFDTITHGEFKVAVSKCVAWLKENLPIRPTNDEKALTKMAPVALFMESDIGLVIHEFALMSIGVPPLVLSPRLPPVAISALLEATAASSFIVSPRMSEPLKGALAALAAKGISTHIGNPYKAYYQPGADPTSVPAFEIPQNPEDVILLLHSSGTTGLPKPIPTTHRQLLFAVNCHKFDTEEQAQSLNLSTLPLFHGFGLVAPGLSMSAGKPTLYPASDGIPNAKSIVDLVNKTNAKSMMTVPFLLDDITNLPNDEGIKALVHMDFVGTGGAALGAGIGDRLAKGGVKLLNFYGTTETGPLSLTFAPTDNYDWKYFRLR…
Agaricomycetes	Agaricus_bisporus_A10_9_GCA_041430195.1	Atg_2-KS-AT-DH-MT-ER-KR-xCP	MVLAMAKKPMTSSSFVEEWAKGQHIQPGSKKSTSVFYRNLEEELDAVRAQHSFATLHTRPDDLIDFSSCDVLGLGRSNAIRDAFVEEFARHPELTVGAHAGRLLDGNTAYMETVEHEIAALHGAETALIVTSSAIGNDAIFQAVPLAGDAIVYDELMHASALDGFKHSVSLCQRSFRHNNVDSFMETLMAVRDSQPQIRNGTRCVLVALESVYSMDGDICPLREFVDAAKEVFPDGNCQFMVDEAHSSGNIGPNGAGLVSVIMCNQTIRDVLLNYGRQIQFSNAPSATVVATARAGYEMLASGKTAMAQKRVQRAVKLFMEAMTEHPIWDTANDAGVIRIPLYEEIDWEGQPYLSPICPVWTRPKHNIWLSLHLQAAGYGVYPILYPIVPKGTDRVRVI…
Agaricomycetes	Agaricus_bisporus_AB58_GCA_008271545.1	SAT-KS-AT-PT-xCP-xCP-xCP	MSAATFLNIPIFAGQGAAAADYPAFRKQAQRDATSSAGSLLLTACFEAFHAELSCLAQDEILRTGIDLSDFKHRNAILDIPPDCYLSNPILTGTTLFLFQSLRYLAYIETSGGVEETLAPFSDILKGNREYQLGVLGFSSGILPAVVVATSFNAISYISRSVEAYRLAFWIGVRVQQFREKIALHNPDSPWSLVFSGLDKKSAEEAIIAFDSDFPLSVTAVLDGRSVTMSGRPDILEAFSRTTPSSVAIHKTTVNCLYHFHLHSATLQQLLCDVVTRGIAFPNYADIRVPVRSTLTGLALSSINAGSLIEAVIEMIITQPVNWDLVVEKVVKAAPMDKNIRLLNVGPGTGLTRNLGKSFSREHVSFLDLTTGNFTRAKQIPIAIVGMGVHMPGARSAEE…
Agaricomycetes	Agaricus_bitorquis_BH01_GCA_030246685.1	SAT-KS-AT-PT-xCP-xCP-xCP	MSAATFLNIPIFAGQGAAAADYPAFRKQAQRDATSSAGSLLLTACFEAFHAELSCLAQDERLRTDIDVSDFKHRNALLDIPPDCYLSNPILTGTTLFLFQSLRYLAYIETFGGVEETLTSFSDALKGNREYQLGVLGFSSGILPAVVVATSFNTISYVGRSVETYRLAFWIGVRVQQFREKIALHNPDSPWSLVLSGLDKKSAEEAIVAFNSDLPLGVTAVLDGRSVTISGCPDVLEAFSRTIPSSVAIHKTTVNCLYHFHLHSATLQQLLGDVVTRGIVFPNYADIRVPVRSTLTGLALSSKNAGSLIEAVIEMIIVQPINWDLVVEEVVKAAPMDKKIRLLNVGPGTGLARNLGKSFSRKDVSFLDLTTGKLTRAKQNPIAIVGMGIHMPGARSAEE…
Agaricomycetes	Agaricus_sinodeliciosus_ZRL20160001_S65_GCA_022315185.1	SAT-KS-AT-PT-xCP-xCP-xCP	MSAATFLNIPIFAGQGAAAADYPAFRKQAQRDATSSAGSLLLTACFEAFHAELSCLAQDERLRTGIDVSDFKHRNALLDIPPDCYLSNPILTGTTLFLFQSLRYLAYIETFGGVEETLTSFSDALKGNREYQLGVLGFSSGILPAVVVATSFNTISYVGRSVETYRLAFWIGVRVQQFREKIALHNPDSPWSLVLSGLDKKSAEEAIVAFNSDLPLGVTAVLDGRSVTISGCPDVLEAFSRTIPSSVAIHKTTVNCLYHFHLHSATLQQLLGDVVTRGIVFPNYADIRVPVRSTLTGLALNSKNAGSLIEAVIEMIIVQPINWDLVVEEVVKAAPMDKKIRLLNVGPGTGLARNLGKSFSRKDVSFLDLTTGKLTRAKQNPIAIVGMGIHMPGARSAEE…
Sordariomycetes	Akanthomyces_lecanii_RCEF_1005_RCEF_1005_GCA_001636795.1	SAT-KS-AT-DH-xCP-xCP-MT	MCQIESKLDALRGQAAAKQLSEFFSGNSSGELLCEESRNMTTIPLTIIAHIIQYISFLEGKGQSIDHSAVLGSAHSVGAQGLCVGLLSAVAVSSAMTKEEIGKLAASAIELGFCIGAFVDLDQHTVTDGTLYANLAVRWKSPMTLQSLGRFLTNYAGTYISVIRDVRDVTITTPASHAAALQQGLTQEGLSAMDIGLRGRYHSLAYEKVLQKIITVCKSRVDPQFGRDVKRVSVIKFRGTLSGPEEIARSTASSNGKIKTANSLYPEDAIAVIGMSCKFPGADSIDEFWSLLSRGTSMLSKMPEDRFDRKNLPRNAKGGLSFWGNFINDIDAFDHKFFKKSAREAASMDPQQRLLLEVTYQALESSGYFTTTAAESNVGCYIGACSVDYDGNVGSHPPT…
Sordariomycetes	Akanthomyces_muscarius_na_GCA_040955805.1	A-xCP-KS-AT-xCP	MTDSTSTELLLAGGLLGMDLRSTRNGLTSVGDSNGASDPSKLGHCLHYLLEDAAKKYPTHLALICGNTTLTYRELNEAANRFARVLVGLGIGKHDLVGVALDRSADLVVTLIAVLKTGAAYVPLDATFPSQRIRHTLDVAAPKILVVTAGMLGAFKSWAGVILSVDETTTGMASPQADSTNLDLDRDPEDLAYVIFTSGSTGKPKGVEISHEALCNLLLSMTEVFNCEATDRLLAVTTITFDIAALELFMPLLCGAAIVIAQGQDIKDAKAVRSLLEQHAVTTMQATPAYWQMLLDSGWKGSTALSKILCGGEAMSARLAARLLECGGSLWNLYGPTEATVWASAWRVQPGEGIVIGNAIANYQLYILDEQLQSVPQGQYGELYIGGCGLARGYHKNPE…
Sordariomycetes	Akanthomyces_muscarius_Ve6_GCA_028009165.1	SAT-KS-AT-DH-xCP-xCP-MT	MCQIESKLDALRGQAAAKQLSEFFSGNSSGELLCEESRNMTTIPLTIIAHIIQYISFLEGKGQSIDHSAVLGSAHSVGAQGLCVGLLSAVAVSSAMTKEEIGKLAASAIELGFCIGAFVDLDQHTVTDGTLYANLAVRWKSPMTLQSLGRFLTNYAGTYISVIRDVRDVTITTPATHAAALQQGLTQEGLSAMDIGLRGRYHSLAYEKVLQKIITVCKSRVDPQFGRDVKNTADPWILSIGADALPRSTTKRVSVIKFRGTLSGHEEIARSTASSDGKIKTANSLYPEDAIAVIGMSCKFPGADSIDEFWSLLSRGTSMLSKMPEDRFDRKNLPRNAKGGLSFWGNFINDIDAFDHKFFKKSAREAASMDPQQRLLLEVTYQALESSGYFTTTAAEPNV…
Sordariomycetes	Albophoma_yamanashiensis_JCM_11844_GCA_001600555.1	ER-KS-AT-DH-MT-KR-xCP	MSAQPPAKQTAIVGLGDGNIGLQRDAAVPQLADDMILVRNVAVALNPIDAKFVGKLATPGAIAGMDFAGEVVAVGSNVRTVAPIQVGDRVCGAVPGMHALSPDVGAFAEYVGAADVTTMKIPSYMSFEAAASLGSGMGTIGMALFQSLNVPGTPKHPADKPVNVLVYGGSTATGTLAIQLLKLAPLCTDDIRSYTRNSLGFVLDCISEPETMQFCYACIGRAGGKYTALEPYPEFLHTRPNTVVPDWVLGPTVLGKKIGWPEPFAREPSEEQRAFGIEWFATAQELLDSGKLKPHPLRLVAGGLGSVLYGLEQLRLKKVSGEKLVCRIQASSHENMDRILAEESTPSGEKRYLVSYTGPEAGSSKWVELDKLQEKPQVLHDCPSKLWDLFKSPSDVSET…
Sordariomycetes	Albophoma_yamanashiensis_JCM_11844_GCA_001600555.1	SAT-KS-AT-PT-xCP	MPPSSQVEDKVGEKSASGSEPTLLYFGNEFPSDDLNELFRRLQQHSKDRRFRLLNAHLEESTLVLQDEINKLPHHIRSQVPHFDNIVTLSENGYLRDLGLGAAMESALLIVLQLGLFIGHHEALERELDVSGGTTTVAGLSVGLFSGAAVALSTTLAEVVRNGAECLRVSFRLGVYVGDFSQKLEAPHPDGLPQSWAHVVTGLAEDSVRAELDRVNKELENPEISKVFVSAADKSSVSVSGPPSRIKAAFLQSSDLRYSKSLPLPVYDGLCHASHLYGQEDVDAVLDKEAALIPLTRSLRLPIISSRAGTPFSAATAGDLLSEIATELITGAIYLDKVTAGILRHIGAAPETQKCRIDSFRTSIIFKGIVDAINSTFAGIAVTKNDMVEWVHRDFGTRS…
Sordariomycetes	Albophoma_yamanashiensis_JCM_11844_GCA_001600555.1	SAT-KS-AT-PT-xCP-xCP-Red	MVDHLKLYLFGDQTFSLQPHLRNLLQKRDNPFLQYFLSKAYDAVRVEMYRLPSQVRDDLPRFTCVEDLVSWDQSGKRCVALDMALATMYHLGAFISCSSSTTDLVPMAVDAVITAFRTGILVTDVAKRLDQSQELDQSWAMLVPGSTSAAAVQQFCEKSHLPLTSRPYISAYAPNGITVSGPPRSLAQLVSSPSFKGLTSKCIPIYGAYHTPHLYSQLDARGMVSHSSYNAATTRSEQIPLLSSTGIRLEERRFAVLLEEAVGQVLLHPLYWSSILGDLRACLQDVNPTQFSVVPIGSSAHNLIYTSLKQTPLRSLVPNTSAQNELPSLHATSAFSPKKPKLAIIGMSGRFPGAKNDEAFWDVLYQGLDVHKPVPGLHWDAKTHVDPTGARKNTSATPF…
Leotiomycetes	Allantophomopsis_cytisporea_ATCC_66955_GCA_024752435.1	KR-xCP-KS-AT-DH-ER-MT-KR-xCP-xCP-xCP-xCP-KS	MDVTDVGAMGQLKAKLQNRGWLPIRGVVHAAGVLDDVTLARISAKSFDVVHRPKVVGARNILECLCNGNIDKLEFFVGFSSVASLLGLPAQASYAASNAQLDAMVTHLRKTQGLPAITVQLGGVTDVGMSARVSDHVHTWGVGQIASIDFGCLLEKMIRMAKSPRYSTLVGANLDWKTLSKSRRPEQNMVLSAFTSSSSAPLVWQEVQGTGNNEASEARRQLSPFSSAPKESVCGLSSDEVTKTIKEVLMNVAGLEVGMDESLYEAGLNSLSAIQFRNVLAENFFQVELPPTLIFDYPSVNHIVQHICQQQQSIAVVLPVSIGALSAKTERAVPVDGNDIKEIDEAIAVIGVEARMPGSANSFDEFWENLCAGVDGIRDVPYARFDADDYLDDNMMAGG…
Leotiomycetes	Allantophomopsis_cytisporea_ATCC_66955_GCA_024752435.1	MT-xCP-KS-AT-DH-MT-KR-xCP	MRVRSITVQPTSSICHILSELSQSYSDTILIDIASILASTVDKSSSALAPLLELFEALAAISEYQKTRIIFITEGLFSVSGNEAAQIEADRTDVTALVFRFAALLKIERIDIDARSPTRANAEALCYMLGAHDMKNANEGNLGGITAVRECYKLYKPVWVEAARVPNACDVGDALYASFPCFRDRQQTSEMESLLSETCMEALGAIVDPSIFERGSEALARLAKQSLVAAIASLTKEELNRSVPLHLKKLCERYKQTKDLNSDGGAILPETVATERYQDEIAALFNEFPWLKPSITLLGNAIERHRDVLLGKLAPLDVLFAKEKPVDNRGHENAQHIAVSGAATDVYDEAVLAKVHKSVVKAIISRLCDLASSSGHRLRIIEAGAGTGGTALPILQMLK…
Leotiomycetes	Allantophomopsis_cytisporea_ATCC_66955_GCA_024752435.1	SAT-KS-AT-PT-xCP	MKVAYFSNEFPHDDTRDLFRRLYVHSKDKRYPTLARFISEATLALRNEVAALPTALRALVPTFDTVFDLVEQTAVRQGRLGGAIDGVLLCALHIATFIGFYESGTEEEFDLSAVDTCLAGLGTGLLSTVALSLSPSLADLPTTGALVIGIAFRLGVVVDDVSENLQPRPTIADSGPGDSWAYVVPDVSPEEIQKELDTIQGAEKTPEPSKIFVSALSRTSVTVSGPPARLKHLFLVSAYFRDRKHVALPVYAGLCHAAHIYNEHHVEKIISSSSMDAVNAKYRPQARVLSTGTGRPFSGLTAKDLFHNVIEEILTKAIQWDEVIGGIIQRAKDSAAVECEVLLFRTSLPVHELLAAFGNDLSQFKATTKDLVSWIAKPDSPPAGPRGSAQSKIAIVGMA…
Leotiomycetes	Allantophomopsis_cytisporea_ATCC_66955_GCA_024752435.1	SAT-KS-AT-PT-xCP-xCP-Te	MPDNMAFLIFGDQSLDTYGFLSEFCRRGSPSILATTFLDLVATALNTQISKLPSTERQKIPTFSSIQQLNERYHAQKYKNSAIDGALLCITQLAHYIDREEKNHEDVTRPFETCVVGLCGGLFAATAVASAPSLSALVSLGVELTLIAFRTGAQVAALAERLAQTTEQSDSWTYVVPGATETSAKAKLAAFHESASTPLAARAYISAITSTSIAISGPPSTLDALFKSEHAFEKKPTPIPVYGPYHAPHLHASTSIDQILRLDDPSVVETLGNAVPRFSVMSTTTGSWYTEKTTTELLKKIIYDILNEPLQFHHVLQGCLSRATNYRGSRCLVIPFGPTHAANSLANLLKSQTDLEVVLRNSPTKKDNEASAPGNHGTAGRGRLAIVGMSGRFPDAASH…
Leotiomycetes	Allantophomopsis_lycopodina_ATCC_66958_GCA_024752465.1	SAT-KS-AT-PT-xCP-xCP-Te	MPDNMAFLIFGDQSLDTYGFLSEFCRRGSPSVLATNFLDLVSASLNAQISKLPSIERQKIPSFSSIQQLNERYHAQKYRNSAIDSALLCTTQLAHYIDRAEKKHEDITRPFETCVVGLCGGLFAAAAVASAPSLSTLVPMGVELTLMAFRTGAQVVALAERLVQTTEQSGSWTYVVPGATESSAKEKLAAFHESANTPPAARAYISAITSTSIAISGPPPTLDAFFKSEHAFEKKPTSIPVYGPYHAPHLHASTSIDQILRLDDPEVVETLGNAVPRFSVMSTTTGSWYTEKTTTELLKKIVYDILNQPLQFNNVLHGCLSRAANYRGTRCLVIPFGPTHAANSLATLLKSHTDLEVVLRNSPTKKDNEASAPGNHGTAGRGRLAIVEQGLDVHREVPK…
Dothideomycetes	Alternaria_alstroemeriae_LH_A124_GCA_037044435.1	A-xCP-KS-AT-xCP	MVPENEFNLTDDPSKLGHNVVSLFEQIQSRYSPKPAIVCGDHTITYGVLASESDRLACLLLSRGISRGHVVALALDRTPDLIIFILGVLKAGAAYVPIDPALPSERVNQMLDDEALRLVIVSHASTKGMTSNCRCDYGHKAACCTTSELRDQMRYQADKKPAVDIQGDDLAYILYTSGSTGKPKGVEVHHAAICNYALSVHQRPGCTDQDRVLFRSTISFDMSAIEIYVPLLCGATVVQAQTYEIRDPRALIHLINHHAVTFAVTTPTILQMLLDSGWCGTPGLSKLLTGGEALSPRLAERLTACVEEVWNIYGPTETTMSVATWKVQVGEDILIGTPKANIRLYVLDADMRPVPVGGTGELYISGAGVARGYRNNPERTKAAFLPDPFWEGHTMYKSG…
Dothideomycetes	Alternaria_alstroemeriae_LH_A124_GCA_037044435.1	KR-KS-AT-DH-xCP-xCP-MT-Te	MANDELIHKLTWSPTALSKEPLSIAHVVFVVAEKESESLSAYQAQLANEGITTVVTDDAMKINPLITPKTIVVYIPPTAKSKEEIYAAATQACTSLINVAQQLYHRSISAKSKTVKLFSIVPKDWGIGDLVYAPLHGLSRVLKTEIPEIMAALKYAQGFDVVRICEGEAQVAYLQPFTDELSDKKELQLHANSSYLITGGTGGIGLATAAWLAQRGARNIVLVSRRGLPPSSDSKAVEANSADLISRIAKLKAVGVSVHVLAVDISKPNADVTLSQTINDLDIPPIKGVIHAAGTAGYHTLTRCTPTDIADNLAPKVIGSLNLDALFPPGTLDFFVFTSSVGQLVGFPGQLAYAPSNAFLDALAAHRRRQGDNSMAILWAGWQGTGVWDQSKSAMRRLN…
Dothideomycetes	Alternaria_alstroemeriae_LH_A124_GCA_037044435.1	SAT-KS-AT-PT-xCP	MSAPTKLVFFGNEFPNDDLKTLFRGLHRHSKDRRFRQLATFLEESTRVLQNEVAQLPEPLKKLVPHFENLMPLTEVDFRQGPLGAAMESALLTILELGMFIGHYEAEERAWDLSADRTTLAGLSIGLLAAAGVALSTHLAEVVQNGAECVRVSFRLGVYVHDISRKLEAPQADGSLLSWAHVVTGESASDLQEELSRYNTETGTPELLKVFISAADKTSVSVSGPPSRIRAAFRASQRLRYSKSLALPVYDGLCHAAHLYDEETIHRVLHPDGSVIPTSRPVQLALLSSRSGQPFEATTAAELFRAISTELLTGTIFLDNITAGILDRTERCADTTKCQIETYRTSLVFKGLLKALEACFPDRTISTTDLIPWVFQDYGARQPKSCADSKLAIVGMACR…
Dothideomycetes	Alternaria_alstroemeriae_LH_A124_GCA_037044435.1	SAT-KS-AT-PT-xCP-xCP-Te	MSKMETVAEVFIFGDQTVAFESTLHSLLHVKDNAVLTDFFDRVGYQLRRYVGNLPLHQQEWFPYFTTLIDLLAQHENCHAAPALKLPLLCATELGQFIRHYGQAGRTYPAPESTFLIGACTGAFAAAAVATSQTLAELVPAAVEAVTVAFRTALRSLILRNDLELNIDGSQKSWSAIVGVCEPEAASAIRCFNVEKGLPPIARLYLSSVSRTNVSISGPPRLLGQFLLSCAWKHSLLPIELPYHASHLFRKDDVEIIVGDFHDFSLLKYTQRTKVICAVSGEVVVASDLRSLLHRAVQEALCEPLQWNCIAASLSRELKQCQLTECVINQVSTRSGSLISSALSQEAFLGVKIVQSIGDVAVSPALSSPTGKFSQSSIAIIGFSGRFPESDSNEEFWEM…
Dothideomycetes	Alternaria_alstroemeriae_LH_A124_GCA_037044435.1	SAT-KS-AT-PT-xCP-xCP-Te	MEGPSRVYLFGDQTSDIEAGLRRLLQAKNSTIVQSFFQQCFHAIRQEIAKLPPSQRKLFPRFTSIVDLLSRSRESGPSPVLESALTCIYQLGCFIHFYGDLGHDYPTPSNSHLVGLCTGVLSCTAVSCAKNVGELIPAAVEAIVIALRLGICVFRVRELVASADSESTCWSALVSGISEAEASRLIDEYSSKKATPPSSKPYISAVSSNGVTVSAPPTILDEFVETCISKNYKPVKAPIHGPYHAPHLYDDKDIERILHQSSALEELTGWSPAIPVISSNTGKPIKATSIKDLFKVALEEILLRRLCWDKVTESCTSVCKTCKNHSCKLFPISSSATQSLFTVLKKAGVSISLETGVGEIAINPETRNLTGKAENSKIAIIGMSGRFPESDGTEAFWDL…
Dothideomycetes	Alternaria_alternarina_TB_1129_GCA_036971565.1	SAT-KS-AT-PT-xCP	MIRAKVLYFSGEIPQGDPEGDQRDLFRKLHLLSKERSYPILALFLETITRAVKEEQRRLIRTERDSIPAFESILDLTDHVVELRKTSLGGAVERVLVLAFQLGSFIAYHEAHPLEYNFQSSDTFLIARGPGMLSAAAIALCPNVSMVPSIAGDIAKVAFRFGLVVDQVCRSLEISPDEINAAGAWIYCVYGVDPSEAEEAVALFNAEKEYAETSAASVFNDDGKSVSIGGPPSTLKTLFTECEFFKRTRNVPMKKVQGMWHTGKVYGTEHVRQVVPHIDEKHRLHLSLFSPVTGQPFKAANANELLEQIMEEMLTQRIRWDRTIQSVTEQLKQVSPNSTQLIAIQPSQYVESLLAQWKADIPTATHTAEDMMSAIMNLPLGSSPAKDAKSSKVAVVGMA…
Dothideomycetes	Alternaria_alternarina_TB_1129_GCA_036971565.1	SAT-KS-AT-PT-xCP-xCP-Te	MNVLIFGDQTADQYPLLRKACTWKNNSTLTTFLDRVSQVVREEVQKLPRTQRDQIPNFLTTWDLIEAYYAKGLKIPQLESCMVTIAQLAHFIGYYAENPSDLQNPANTRVVGLCTGLLAGSVVASARSLSELLPLATEAVRIAFRTGTVVGAAKEAVEQASAPKETWSTIVTNMTEKAAKDAIAAFHEEQQTPTLAQAYISAVSTMALTISGPPATTKRLLQGDAFKGCARVAIPVYAPYHAAHFYSPADIDQILDKDAIRHLQQFRPLSLVHSATTGKCHTATSTLDLIRSALTEILVEPVRWDNLLTEVVSQVTATSSQDCSVSAIGVTTITNSLVSALRNGGQSSVTARDHTTWVAAEHDSRGRTQNDKIAIVGMSGRFPGAANPDALWDLLEKGL…
Dothideomycetes	Alternaria_alternata_Altal1_GCA_023079285.1	SAT-KS-AT-PT-xCP	MIRAKVLYFSGEIPQGDPEGDQRDLFRKLHLLSKERSYPILALFLETITRAVKEEQRRLIRTERDSIPAFESILDLTDHVVELRKTSLGGAVERVLVLAFQLGSFIAYHEAHPLEYNFQSSDTFLIARGPGMLSAAAIALCPNVSMVPSIAGDIAKVAFRFGLVVDQVCRSLEISPDEINAAGAWIYCVYGVDPSEAEEAVALFNAEKEYAETSAASVFNDDGKSVSIGGPPSTLKTLFTECEFFKRTRNLPMKKVQGMWHTGKVYGTEHVRQVVPHIDEKHRLHLSLFSPVTGQPFKAANANELLEQIMEEMLTQRIRWDRTIQSVTEQLKQVSPNSTQLIAIQPSQYVESLLAQWKADIPTATHTAEDMMSAIMNLPLGSSPAKDAKSSKVAVVGMA…
Dothideomycetes	Alternaria_alternata_Altal1_GCA_023079285.1	SAT-KS-AT-PT-xCP-xCP-Te	MNVLIFGDQTADQYPLLRKACTWKNNSTLTTFLDRVSQVVREEVQKLPRTQRDQIPNFLTTWDLIEAYYAKGLKIPQLESCMVTIAQLAHFIGYYAENPSDLQNPANTRVVGLCTGLLAGSVVASARSLSELLPLATEAVRIAFRTGTVVGAAKEAVEQASAPKETWSTIVTNMTEKAAKDAIAAFHEEQQTPTLAQAYISAVSTMALTISGPPATTKRLLQGDAFKGCARVAIPVYAPYHAAHFYSPADIDQILDKDAIRHLQQFRPLSLVHSATTGKCHTATSTLDLIRSALTEILVEPVRWDNLLTEVVSQVTATSSQDCSVSAIGVTTITNSLVSALRNGGQSSVTARDHTTWVAAEHDSRGRTQNDKIAIVGMSGRFPGAANPDALWDLLEKGL…
Dothideomycetes	Alternaria_alternata_ATCC_34957_GCA_001443195.1	SAT-KS-AT-PT-xCP	MIRAKVLYFSGEIPQGDPEGDQRDLFRKLHLLSKERSYPILALFLETITRAVKEEQRRLIRTERDSIPAFESILDLTDHVVELRKTSLGGAVERVLVLAFQLGSFIAYHEAHPLEYNFQSSDTFLIARGPGMLSAAAIALCPNVSMVPSIAGDIAKVAFRFGLVVDQVCRSLEISPDEINAAGAWIYCVYGVDPSEAEEAVALFNAEKEYAETSAASVFNDDGKSVSIGGPPSTLKTLFTECEFFKRTRNVPMKKVQGMWHTGKVYGTEHVRQVVPHIDEKHRLHLSLFSPVTGQPFKAANANELLEQIMEEMLTQRIRWDRTIQSVTEQLKQVSPNSTQLIAIQPSQYVESLLAQWKADIPTATHTAEDMMSAIMNLPLGSSPAKDAKSSKVAVVGMA…
Dothideomycetes	Alternaria_alternata_ATCC_34957_GCA_001443195.1	SAT-KS-AT-PT-xCP-xCP-Te	MNVLIFGDQTADQYPLLRKACTWKNNSTLTTFLDRVSQVVREEVQKLPRTQRDQIPNFLTTWDLIEAYYAKGLKIPQLESCMVTIAQLAHFIGYYAENPSDLQNPANTRVVGLCTGLLAGSVVASARSLSELLPLATEAVRIAFRTGTVVGAAKEAVEQASAPKETWSTIVTNMTEKAAKDAIAAFHEEQQTPTLAQAYISAVSTMALTISGPPATTKRLLQGDAFKGCARVAIPVYAPYHAAHFYSPADIDQILDKDAIRHLQQFRPLSLVHSATTGKCHTATSTLDLIRSALTEILVEPVRWDNLLTEVVSQVTATSSQDCSVSAIGVTTITNSLVSALRNGGQSSVTARDHTTWVAAEHDSRGRTQNDKIAIVGMSGRFPGAANPDALWDLLEKGL…
Dothideomycetes	Alternaria_angustiovoidea_FKII_L2_CM_DRAB1_GCA_022814545.1	SAT-KS-AT-PT-xCP	MKRAKVLYFSGEIPQGDPEGDQRDLFRKLHLLSKERSYPILALFLETITRAVKEEQRRLIRTERDLIPAFESILDLTDHVIELRKTSLGGAVERVLVLAFQLGSFIAYHEAHPLEYNFQSSDTFLIARGPGMLSAAAIALCPNVSMVPSISGDIAKVAFRFGLVVDHVCRSLEISPDEINAAGAWIYCVYGVDPSEAQEAVALFNAEKEYAETSVASVFNDDGKSVSIGGPPSTLKALFTECEFFKRTRNVPMKKVQGMWHTGKVYGMEHVQQVVPHIDAKHRLHLSLFSPVTGEPFEAANANELLEQIMEEMLTQRIRWDRTIQSVTERLKQVSPNSTQLIAIQPSQYVESLLAQWKADISTATHTAEDMMSAIMNLPLGSSSAKDAKSSKIAVVGMA…
Dothideomycetes	Alternaria_angustiovoidea_FKII_L2_CM_DRAB1_GCA_022814545.1	SAT-KS-AT-PT-xCP-xCP-Te	MNVLIFGDQTADQYPLLRKACTWKNNSTLTTFLDRVSQVVREEVQKLPRTQRDQIPNFLTTWDLIEAYYAKGLKIPQLESCMVTIAQLAHFIGYYAENPSDLQNPANTRVVGLCTGLLAGSVVASARSLSELLPLATEAVRIAFRTGTVVGAAKEAVEQASAPKETWSTIVTNMTEKAAKDAIAAFHEEQQTPTLAQAYISAVSTMALTISGPPATTKRLLQGDAFKGCARVAIPVYAPYHAAHFYSPADIDQILDKDAIRHLQQFRPLSLVHSATTGKCHTATSTLDLIRSALTEILVEPVRWDNLLTEVVSQVTATSSQDCSVSAIGVTTITNSLVSALRNGGQSSVTARDHTTWVAAEHDSRGRTQNDKIAIVGMSGRFPGAANPDALWDLLEKGL…
Dothideomycetes	Alternaria_angustiovoidea_FKII_L8_BK_P2B_GCA_022814425.1	SAT-KS-AT-PT-xCP	MIRAKVLYFSGEIPQGDPEGDQRDLFRKLHLLSKERSYPILALFLETITRAVKEEQRRLIRTERDSIPAFESILDLTDHVVELRKTSLGGAVERVLVLAFQLGSFIAYHEAHPLEYNFQSSDTFLIARGPGMLSAAAIALCPNVSMVPSIAGDIAKVAFRFGLVVDQVCRSLEISPDEINAAGAWIYCVYGVDPSEAEEAVALFNAEKEYAETSAASVFNDDGKSVSIGGPPSTLKTLFTECEFFKRTRNVPMKKVQGMWHTGKVYGTEHVRQVVPHIDEKHRLHLSLFSPVTGQPFKAANANELLEQIMEEMLTQRIRWDRTIQSVTEQLKQVSPNSTQLIAIQPSQYVESLLAQWKADIPTATHTAEDMMSAIMNLPLGSSPAKDAKSSKVAVVGMA…
Dothideomycetes	Alternaria_angustiovoidea_FKII_L8_BK_P2B_GCA_022814425.1	SAT-KS-AT-PT-xCP-xCP-Te	MNVLIFGDQTADQYPLLRKACTWKNNSTLTTFLDRVSQVVREEVQKLPRTQRDQIPNFLTTWDLIEAYYAKGLKIPQLESCMVTIAQLAHFIGYYAENPSDLQNPANTRVVGLCTGLLAGSVVASARSLSELLPLATEAVRIAFRTGTVVGAAKEAVEQASAPKETWSTIVTNMTEKAAKDAIAAFHEEQQTPTLAQAYISAVSTMALTISGPPATTKRLLQGDAFKGCARVAIPVYAPYHAAHFYSPADIDQILDKDAIRHLQQFRPLSLVHSATTGKCHTATSTLDLIRSALTEILVEPVRWDNLLTEVVSQVTATSSQDCSVSAIGVTTITNSLVSALRNGGQSSVTARDHTTWVAAEHDSRGRTQNDKIAIVGMSGRFPGAANPDALWDLLEKGL…
Dothideomycetes	Alternaria_arborescens_DET2008_GCA_020736785.1	SAT-KS-AT-PT-xCP	MIRAKVLYFSGEIPQGDPEGDQRDLFRKLHLLSKERSYPILALFLETITRAVKEEQRQLIRTERDLIPAFESILDLTDHVVELRKTSLGGAVERVLVLAFQLGSFIAYHEAHPLEYNFQSSDTFLIARGPGMLSAAAIALCPNVSMVPSIAGDIAKVAFRFGLVVDQVCRSLEISPDEINAAGAWIYCVYGVDPSEAQEAVALFNAEKEYAETSVASVFNDDGKSVSIGGPPSTLKALFTECEFFKRTRNVPMKKVQGMWHTGKVYGMEHVQQVVPHIDEKHRLHLSLFSPVTGEPFKAANANELLEQIMEEMLTQRIRWDRTIQTVTERLKQVSPNSTQLIAIQPSQYVESLLAQWKNDIPTATHTAEDMMSAIMNLPLGSSPAKDAKSSKIAVVGMA…
Dothideomycetes	Alternaria_arborescens_DET2008_GCA_020736785.1	SAT-KS-AT-PT-xCP-xCP-Te	MNVLIFGDQTADQYPLLRKACTWKNNSTLTTFLDRVSQVVREEVQKLPRTQRDQIPNFLTTWDLIEAYYAKGLKIPQLESCMVTIAQLAHFIGYYAENPSDLQNPANTRVVGLCTGLLAGSVVASARSLSELLPLATEAVRIAFRTGTVVGAAKEAVEQASAPKETWSTIVTNMTEKAAKDAIAAFHEEQQTPALAQAYISAVSTMALTISGPPATTKRLLQGDAFKGCARVAIPVYAPYHAAHFYSPADIDQILDKDAIRHLQQFRPLSLVHSATTGKCHTATSTLDLIRSALTEILVEPVRWDNLLTEVVSQVTATSSQDCSVSAIGVTTITNSLVSALRNGGQSSVTARDHTTWVAAEHDSRGRTQNDKIAIVGMSGRFPGAANPDALWDLLEKGL…
Dothideomycetes	Alternaria_arbusti_BMP_1465_GCA_024043155.1	SAT-KS-AT-DH-xCP-xCP-MT	MRSQSDHFAPSVAFFCPQSKAPTEAYLEQLQKYIVETPLLLPFAEAITSLTDTWTILCDGHPDIAKLKSGKRHVVSLKRWITDGISGPVSSSMSGILALPLLVVIQICQYFQLLELHGLTHERMLASLKKGGGAQGYCGGLPTAFAVSCAKDEEEVVHLATKALRLAFAVGAFGELGDDELVEGATTIAVRLRTPPQGDELVAGIPRCYISAITDPKTISIVGPVLELEKVAERARNRGLLVTDIHIRGKVHNPENAPLVKVLFDICREHDDMMLPDASQLRVPVRSNLDGSLLHDCSLTHEAINTILASRCEWYRLLKDVAQDLAGSGTDAHTFALFGIGDPVPLMPFHNARLRISKMEVHTTVQGARLAEYKYPEDAVAITGVSCRLPRAADLEELW…
Dothideomycetes	Alternaria_arbusti_BMP_1465_GCA_024043155.1	SAT-KS-AT-PT-xCP-xCP-Te	MNVLIFGDQTADQYPLLRKACTWKNNSTLTSFLDRVSQVVREEVQKLPRTQRDQIPNFLTTWDLIEAYYAKGLKVPQLESCMVTIAQLSHYIGYYAENPSDLKNPANTRVVGLCTGLLAGSVVASARSLSELLPLAIEAVRIAFRTGTVVGAAKEALEQTPVPKETWSTIVTSISEKAAKDAITAFHQEQRIPTLAQAYISAVSTMALTISGPPSTTKRLLQSDAFKGCTRVSIPVYAPYHAAHLYTEADIDQILDKDATRHLQQFRPLSLVHSASTGECHTATSTLDLIRTALTEILVESVRWDNLLSEVVSQVTATSSQDCSVSAIGVTSITNSLVSALKSGGQSSVTARDHTSWVAAEHDSRGRTQNDKIAIVGMSGRFPSAANPDALWDLLEKGL…
Dothideomycetes	Alternaria_arbusti_DAOMC238834_GCA_040583865.1	SAT-KS-AT-DH-xCP-xCP-MT	MRSQSDHFAPSVAFFCPQSKAPTEAYLEQLQKYIVETPLLLPFAEAITSLTDTWTILCDGHPDIAKLKSGKRHVVSLKRWITDGISGPVSSSMSGILALPLLVVIQICQYFQLLELHGLTHERMLASLKKGGGAQGYCGGLPTAFAVSCAKDEEEVVHLATKALRLAFAVGAFGELGDDELVEGATTIAVRLRTPPQGDELVAGIPRCYISAITDPKTISIVGPVLELEKVAERARNRGLLVTDIHIRGKVHNPENAPLVKVLFDICREHDDMMLPDASQLRVPVRSNLDGSLLHDCSLTHEAINTILASRCEWYRLLKDVAQDLAGSGTDAHTFALFGIGDPVPLMPFHNARLRISKMEVHTTVQGARLAEYKYPEDAVAITGVSCRLPRAADLEELW…
Dothideomycetes	Alternaria_arbusti_DAOMC238834_GCA_040583865.1	SAT-KS-AT-PT-xCP-xCP-Te	MNVLIFGDQTADQYPLLRKACTWKNNSTLTSFLDRVSQVVREEVQKLPRTQRDQIPNFLTTWDLIEAYYAKGLKVPQLESCMVTIAQLSHYIGYYAENPSDLKNPANTRVVGLCTGLLAGSVVASARSLSELLPLAIEAVRIAFRTGTVVGAAKEALEQTPVPKETWSTIVTSISEKAAKDAITAFHQEQRIPTLAQAYISAVSTMALTISGPPSTTKRLLQSDAFKGCTRVSIPVYAPYHAAHLYTEADIDQILDKDATRHLQQFRPLSLVHSASTGECHTATSTLDLIRTALTEILVESVRWDNLLSEVVSQVTATSSQDCSVSAIGVTSITNSLVSALKSGGQSSVTARDHTSWVAAEHDSRGRTQNDKIAIVGMSGRFPSAANPDALWDLLEKGL…
Dothideomycetes	Alternaria_atra_na_GCA_907166805.1	SAT-KS-AT-DH-xCP-MT	MNHFAPSVAFFCPQSKAPTEAYLEQLQKYIVGTPLLQPFAQAITSLRYTWSTLCEGHADIAKLKSGERHVASLERWITDGIAGPVSSSMSGILALPLLVVIQICQYFQLLELHDLTHEQMLSSLRNGGGAQGYCGGLPTAFAISCAKDEEDLVRLATKALRLAFAVGAFGELSDDESIEGATTIAVRLRASQQGGELVDDNPGCYISAITDPRTISIVGPVLELKKVAERARNQGLLVTDIHIRGKVHNPENAPLVKVLFDICNEHDEMALPDASQLRVPVRSNLNGKLLDNCSLTHEAINTILASRCEWYRLLKEVAQDLTGSGTDAHTFALFGIGDPVPLMPFHNARLRVSKIEAHTAIQEARLAEYKYPEDAIAITGVSCRLPQANDLEELWQLLA…
Dothideomycetes	Alternaria_atra_na_GCA_907166805.1	SAT-KS-AT-PT-xCP-Te	MKTSHRTVLLFGDVTDPWVEGIDHVYVQAAKKPWIRSFLEDLFSAIKTETKAMDRVLQEGFKDSSSFQELAERYRHAGDDFGMAHAMMIYAIRAVVLLETLSREPHILDESRPRPEVIGISGGLFSAAVMSISINFETLYAACIEAGRVWSRLCNLTLVRSRAMEESPGTWGWAILGIPAADLGKTLDQFQSSMGIHSSKRAKIGVIGDRWSTIIGPPSVLELTLSECPNLKNLPKNELNIHALQHTLSVSDSDIDYIVGNSPLLETPLPSGYRIHGLDDDFPEASYAEWRHLLRASAYQTLSRPLDIVQAVSNLNAALGASKDIEAKIIGPSSHTTYLVKCLQTAGKEVFVQNGFLASPQTSGTNDGIAIVGMAGKGPGSDDLEEFWNVILKGLDLHE…
Dothideomycetes	Alternaria_atra_na_GCA_907166805.1	SAT-KS-AT-PT-xCP-Te	MAETMQVLVFGDVTADYDAGLRILVSKTDNPLLTAFFDQVAFSLRAEIGQLSRSQRNLPGLVRFTTIIDLLARLRASDIRHHALEKALTCVHHFASFISHYGQAETPYPDPATTRLVGLCTGSLTAAAVSCTRSLNELIPLAVQVVLVALRVGFAVTDVRDRISPAQSDQSWSVMIPGLTGNAAVPYLDKFIEETCLTNVWKPYVSAYAGTGVTISGPPSTIDRLLRSKILPKPSAIKFRVHGPYHASHLFSANLLDDIIEASHKSSLLDRNAFIPVCSSTGTGICTGTSLVDLLRNAVSEILISPLRLDDVCKSLSNDLSQCGLDDCVVLPVATLAAQAISNQLKTTITNVSINKGMMSNASTPGAASGNLAQDKLAIIGYSGRYPGAKDNEAFWQLL…
Dothideomycetes	Alternaria_atra_na_GCA_907166805.1	SAT-KS-AT-PT-xCP-xCP-Te	MNVLIFGDQTADQYPLLRKACTWKNNSTLTTFLDRVSQVVREEVQKLPRTQRDQIPNFLTTWDLIEAYYAKGLKVTQLESCMVTIAQLAHYIGYYAENPSDLQNAANTRVVGLCTGLLAGSVVASARSLSELLPLATEAVRIAFRTGTVVSAAKEALEQASATKEAWSTIVTNMTEKAAKDAIAAFHEEQRTPVLAQAYISAVSTMALTISGPPATTKRLLQGDAFKGCARVAIPVYAPYHAAHLYAEADIDQILDKDAIRHLQQFRPLSLVHSASTGKCHTATSTLDLIRTALTEILVEPVRWDNLLTEVVSQVTATSSQDCSVSAIGVTTITNSLVSALRNGGQSSITARDHTTWVAAEHDSRGRTQNDKIAIVGMSGRFPGAANPDALWDLLEKGL…
Dothideomycetes	Alternaria_atra_na_GCA_907166805.1	Te-KS-AT-DH-MT-KR-xCP-C-A-xCP	MDQNPEVIQAHAGDHYTTPVFLIHDGGGTTFAYHCLDPLDRPVYGISNPYFHTGEGFEGGICGMARLYAGIIRLAAANPDFPAERDSGGRANILIGGWSLGGLLALEVAKILTGDRGVRIIGALMMDSIYPVNPPSMVRLGALDDMAAGEKSKNELLTLQAMKEALRVIQKWTPPVWAGTEVRPRFSLLRALDAMPATGIDGVHPADIHRSDPTLGWDAYDTSLFTDVEGVPGTHFEMFSFQHVEGLSKAVKRLPVLYNMYEPVAIVGTACRFPGAASSTSKLWDLLKAPRDVLKEFPPERLNTANFYNENGDMHGRMNVEHKSYLLEEDVRHFDAAFFRINPKEAADMDPQQRLLLETVYEAFESAGWSLDDVSGSDTSVHVGTMTDDYIIIQGRDPD…
Dothideomycetes	Alternaria_brassicae_BTP_GCA_036768455.1	SAT-KS-AT-PT-xCP	MIRAKVLYFSGEIPQGDPEGDQRDLFRKLHLLSKERSYPILALFLETITRAVKEEQRRLIRTERDSIPAFESILDLTDHVVELRKTSLGGAVERVLVLAFQLGSFIAYHEAHPLEYNFQSSDTFLIARGPGMLSAAAIALCPNVSMVPSIAGDIAKVAFRFGLVVDQVCRSLEISPDEINAAGAWIYCVYGVDPSEAEEAVALFNAEKEYAETSAASVFNDDGKSVSIGGPPSTLKTLFTECEFFKRTRNVPMKKVQGMWHTGKVYGTEHVRQVVPHIDEKHRLHLSLFSPVTGQPFKAANANELLEQIMEEMLTQRIRWDRTIQSVTEQLKQVSPNSTQLIAIQPSQYVESLLAQWKADIPTATHTAEDMMSAIMNLPLGSSPAKDAKSSKVAVVGMA…
Dothideomycetes	Alternaria_brassicae_BTP_GCA_036768455.1	SAT-KS-AT-PT-xCP-xCP-Te	MNVLIFGDQTADQYPLLRKACTWKNNSTLTTFLDRVSQVVREEVQKLPRTQRDQIPNFLTTWDLIEAYYAKGLKIPQLESCMVTIAQLAHFIGYYAENPSDLQNPANTRVVGLCTGLLAGSVVASARSLSELLPLATEAVRIAFRTGTVVGAAKEAVEQASAPKETWSTIVTNMTEKAAKDAIAAFHEEQQTPTLAQAYISAVSTMALTISGPPATTKRLLQGDAFKGCARVAIPVYAPYHAAHFYSPADIDQILDKDAIRHLQQFRPLSLVHSATTGKCHTATSTLDLIRSALTEILVEPVRWDNLLTEVVSQVTATSSQDCSVSAIGVTTITNSLVSALRNGGQSSVTARDHTTWVAAEHDSRGRTQNDKIAIVGMSGRFPGAANPDALWDLLEKGL…
Dothideomycetes	Alternaria_brassicae_J3_GCA_004936725.1	SAT-KS-AT-PT-xCP	MAPAKVLYFSGEIPQGDPEGDQRDLFRKLHLLSKERNYPILASFLETITWSMKEEQQRLIRIQRDLIPTYESILDLTDHVVELRKSSLGGAVERVLVLAFQLGSFIAYHEAHPLEYNFQPSDTFLIARGPGMLSAAAVALCPNMSMIPSIAGDIARVAFRFGLVVDQVCRSLEISPDEINAAGAWIYCVYGVDPHEADEAVARFNAEKAYAETSVASVFNDDGKSVSIGGPPSTLKTLFAECDFFKRKVYGMEHVQQIVPDMNQKHRLHLPLFSPVRGRPLEAANAKELLEQIMEEMLTRRIQWDRTIDNVTERLKQLSPDSTQLIAIQPSQYVESLLAQWRTDIPTATHTAEDMMSAIMNLPLGSSPAKDAKSSKIAVVGMACRFPGGADNTERFWEL…
Dothideomycetes	Alternaria_brassicae_J3_GCA_004936725.1	SAT-KS-AT-PT-xCP-xCP-Te	MAPMTADQYPLLRKACTWKNNSTLTTFLDRVSQVVREEVQKLPRTQRDQIPNFLTTWDLIEAYYAKGLKVPQLESCMVTIAQLAHYIGYYAENPSDLQNPANTRVVGLCTGLLAGSVVASARSLSELLPLAIEAVRIAFRTGTVVGVAREALEQASSSKESWSYIVTNMTEKAAKDAIAAFHQAQGTPTSAQAYISAVSTMALTISGPPATTKRLLQGDAFKGCARVAIPVYAPYHAAHFYGEGDIDQILDKDAIRHLQQFRPPFAVLSPRFSSSRQDCLVSAIGVTSITNSLVSALRNGGQSSVTARDHTSWVAAEHDSRGRTQNDKIAIVGMSGRFPGAANPDALWDLLEKGLDVHREVPSDRFDAKAHCDPTGKGKNKSHTPFGCFIDEPGLFDPR…
Dothideomycetes	Alternaria_brassicae_J3_GCA_004936725.1	SAT-KS-AT-xCP	MSQRFEPATAIPTESLILVTGVNGFLGCRFSNTPIERGYRVRGVMRDLERCSHVQAFFRKTTSLFGLGTGLLSAEAASVFANIADLAVASACIVRASFRLGVHVYNISEQLEAPEADGNPWAFVIPDLTAEAVQAELDRYNRDTTNPTLSQIFVSVSDKASISVSRPPSRLRQCLKSCDVLRYSSFMPLPVHHGLCHAPHIYTAVDVQAILEDILDDNQTRISRLKTQLPLLSSSTGRPYAAEDFRSLIDQVLTELLIKQIHIDNVVNSIIKVLDLSSATQQERNLFAFRNSIKLMFDKRDVHTTIPADRFDLNTYFDPTGQIENTTQTPYMNHINSPGLFDAGFFNISPKEAEQMDPMHRLALVTAYEALEMSGYSPNRTRSTSSPRAGTCYGQAGDH…
Dothideomycetes	Alternaria_brassicae_J3_GCA_004936725.1	SAT-KS-AT-xCP-MT-Red	MGKPVVTLFGPLSPSLSQSNLNTLRATILSSSQYSWVNQVLTSLLSDYQSLVTECSDLYNKATETEIIGLAGWLKTGDLVLDRELIPNSLLAPLVVVTQLVQYSTFLDSHEFVPELPIVQETLGFCIGLLPAFAVSLSHQSTTAEFEQNAAAAVRLAMLVGCIVDQQHLRDPRGPSKTFSVAWKRVDSRDNRTELESILEKFQDEAYISVVYDTTRVSITSTVPVLEPLQHTLQDAGFTIKELGLSGRFHSRSDYQDQFESIMEFCDKNPAFKFPMSALRIPTRTHGDMMLKDQTSLHRSALQSILLQRCEWYNTVSELKSFYPSGPTSFVSFGERCIPSSLLGGFSGRLTHFDETISLDMRSNPNDVAVIGMSINVAGASSANEFWDLLASGKSQHQV…
Dothideomycetes	Alternaria_brassicicola_Abra43_GCA_002796735.1	SAT-KS-AT-PT-xCP-xCP-Te	MNVLIFGDQTADQYPLLRKACTWKNNSTLTTFLDRVSQVVREEVQKLPRTQRDQIPNFLTTWDLIEAYYAKGLKVPQLESCMVTIAQLAHYIGYYAENPSDLQNPANTRVVGLCTGLLAGSVVASARSLSELLPLATEAVRIAFRTGTVVGAAKQALEQASSPKETWSTIVTNMTEKVAKDAIAAFHAEQRTPALAQAYISAVSTMALTISGPPATTKRLLQGDAFKGCVRVAIPVYAPYHAARFYGQVDVDQILDKDAIRHLQQFRPLSLVHSASTGQCHTATTTLDLIRAALTEILIEPVRWDNLLTEVVSQVTATSSQDCSVSAIGVTSITNSLVSALKNGGQSSVVGRDHTSWVAAEHDSRGRTQNDKIAIVGMSGRFPGAANPEALWDLLEKGL…
Dothideomycetes	Alternaria_brassicicola_Altbr1_GCA_023079265.1	SAT-KS-AT-DH-xCP-xCP-xCP-MT	MTLSKLRQQSSAAIFCPQSKAPEKSYLDQLQKFLVEHEQLQRLAEDVKRLQETWDTIAGRREDIAALTQGPRYTRALHDWVEEGASAPVANAMSGILSLPLLVVIQTCQYFQYLQLAGLTHAEFLDGLKTGGAQGYCGGLLPAMAIACAKDEDEVVTMAAVAMRIALAVGAYGELGDDQNLPGPTTIVVRLRQEGQGEDIVRKFPGSYVSAVTDPKTISIVGPVPTLEAVSAYARERGLLVQGMHLRGKVHNPENAELAKELCELCDEFESLTLPACSELQVPVYSNITGRRLRDCSLTHEAVRTILASRCEWWTLLNELAQALKATGTQSHTFAMFGIGDCVPLMPFHQATLKISKIDVHRTIREAELKDYKLPEDAIAVVGAACRLPGANSLEELWD…
Dothideomycetes	Alternaria_brassicicola_Altbr1_GCA_023079265.1	SAT-KS-AT-PT-xCP	MPIYTPPYDSQDESQEMRLVYFSNEFPHDDLQDLFRRLYNLSKDKRHPILARFINEATSAIRDEVRELPTSLRELIPPFSTVLDLADHPELRKGPLCGSIDGVLLCVVELATIIRYYENSPNEFDLHSGHTYLAGLGIGLLATAAVSLAQTLAELPLVGAEVARVAFRLGVVVHEVSQNLEPRDLSGSLDAWASVVPGVKAEDVQAELDAVKARENIPEPSKIFISALNQTSVTVSGPPSRLKHLFRTSEFFRGHKVVTLPVFGGLCHAKHIYNRQHVHEVIDVSSLNELDATYAPALPIFSTSTGNQYTATTAKDLFEQIIWEILTQQIQWDNVIQGVVDQANSIAASSCQVLVFRNSIPVHDLLASLKSNLDPFEAVTEELIPWVKKSFPGEGTPRG…
Dothideomycetes	Alternaria_brassicicola_Altbr1_GCA_023079265.1	SAT-KS-AT-PT-xCP-xCP-Te	MNVLIFGDQTADQYPLLRKAVLRKDNALLSTFLERASVTLRNETKRLPRSQRESIPDFLSLSSLIEAYYEKGLKVPQIESALVTIAQLSHYIGYFGENPTELPSLANTRALGLCTGLLAASAVASARTLSDLLPLAIEAVRIAFRTGAVVGNVRDALEHIQEEPQSWSTIVAGISEESAKTALADFHQEKGIALSNQAWVSAVSVMAITISGPPATTQRFFAESEAVKGKTRVPIPVYAPYHAAHLHSQADVDSILDSEARELLSQYRPQCLVHSSVTGQCHSATSTLELFQLALGEILQEPVRWDRLLEEVVSQVTEFSKSECSVTAVGVTNVANSLVSALRAGGQTAITGRDQSSWARPAETGTGRTQNDKIAIVGMSGRFPSAANAEKLWELLEAG…
Dothideomycetes	Alternaria_brassicicola_Altbr1_GCA_023079265.1	SAT-KS-AT-PT-xCP-xCP-Te	MVYRDILLFAGQGSSLFGSDHVNTRTADILASSHTANSLLKACHEALITELDTLDDNDKRVLPDDMRSSLSTPESLVDPPSRLCSNPVVQGTTLFIHQMLEFIAYESALNSPPELAETSGFCSGVLAAIVTASSLSPRSPDFVDTAVHAYRLSFWIGLRNGLFCRRVIGGSRDGSSWSLTVLGMPAHELEGLVNEYNKAQNQTPPIRIAAVLSEKAFSLTGPGTALDDFRANGLPKSTPSLPANVHGYYHGGPLLHDTQRQIMVDVQRRGINFPAWEALKVPVRSTCDGEYLNAADHGVSLLEAALRSILVQPVDWWLASQKLVSFANARLDEDINLSYRILALGPNAKSLLRALKENKSHDRLHIADGVSNVDSEPSPNDIAIVGMSANFPRGKGTAE…
Dothideomycetes	Alternaria_burnsii_CBS107.38_GCA_013036055.1	SAT-KS-AT-PT-xCP	MIRAKVLYFSGEIPQGDPEGDQRDLFRKLHLLSKERSYPILALFLETITRAVREEQRRLIRTERDSIPAFESILDLTDHVVELRKTSLGGAIERVLVLSFQLGSFIAYHEAHPLEYNFQSSDTFLIARGPGMLSAAAITLCPNMSMVPSIAGHIAKVAFRFGLVVDQVCRSLEISPDEINAAGAWIYCVYGVDPSEAQEAVALFNAEKEYAETSVASVFNDDGKSVSIGGPPSTLKALFTECEFFKRTRNVPMKKVQGMWHTGKVYGMEHVQQIVPYIDEKYRLHLSLFSPVTGQPFKAASANELLEQIMEEMLTQRIRWDRTIQSITERLKQVSPNSTQLIAIQPSQYVESLLAQWKADIPTATHTSEDTMSAIMNLPLGSSPSKDAKSSKIAVVGMA…
Dothideomycetes	Alternaria_burnsii_CBS107.38_GCA_013036055.1	SAT-KS-AT-PT-xCP-xCP-Te	MNVLIFGDQTADQYPLLRKACTWKNNSTLTTFLDRVSQVVREEVQKLPRTQRDQIPNFLTTWDLVEAYYAKGLKIPQLESCMVTIAQLAHFIGYYAENPSDLQNPANTRVVGLCTGLLAGSVVASARSLSELLPLATEAVRIAFRTGTVVGAAKEAVEQASAPKETWSTIVTNMTEKAAKDAITAFHEEQQIPTLAQAYISAVSTMALTISGPPATTKRLLQGDAFKGCARVAIPVYAPYHAAHFYGSADIDQILDKDAIRHLQQFRPLSLVHSATTGKCHTATSTLDLIRSALTEILVEPVRWDNLLTEVVSQVTATASQDCSVSAIGVTTITNSLVSALRNGGQSSVTARDHTTWVAAEHDSRGRTQNDKIAIVGMSGRFPGAANPDALWDLLEKGL…
Dothideomycetes	Alternaria_burnsii_HNLF_44_GCA_021613345.1	SAT-KS-AT-PT-xCP	MPSSSSWDSIEDPKPSLLFFNNDLPSDDINYLYRVLHRCSAQLSCPQLAHFITLCNKVITEEIAKLPKHWQENVPDFVNVLSLVNDNAFRKGPLGGAMEGVFLNILQVGMILGHHEVEQIPYQFNPKTTMLFGLGTGLLSAAAASVSLNIADLAVAGAHIVRASFRLGIHVYNISEQLEAPDPEGNPWAFVIPGLAAEVVQTELDRYNRDTANPTLSHIFISASDKASVSVSGPPSRLRHCLKSCDVLRYSNFMPLPVHHGLCHAPHIYSAVDVQAIIEDTLDDDHTRIAGLNTSLPLLSSSTGRPYTAKDFRSLIDQILAELLMNKIQIDNIVDGIIEVLDLPLACQQERNLFAFRNSVVLRTMMKNVEKQCDSRIAFTHRDLVEWTKREESDAETSI…
Dothideomycetes	Alternaria_burnsii_HNLF_44_GCA_021613345.1	SAT-KS-AT-PT-xCP	MIRAKVLYFSGEIPQGDPEGDQRDLFRKLHLLSKERTYPILALFLETITRAVKEEQRRLIRTERDSIPAFESILDLTDHVVELRKTSLGGAVERVLVLSFQLGSFIAYHEAHPLEYNFQSSNTFLIARGPGMLSAAAIALCPNVSMVPSIAGDIAKVAFRFGLVVDQVCRSLEISPDEINAAGAWIYCVYGVGPSEAQEAVALFNAEKEYAETSVASVFNDDGKSVSIGGPPSTLKALFTECEFFKRTRNVPMKKVQGMWHTGKVYGMEHVQQVVPYIDEKYRLHLSLFSPVTGQPFKAASANELLEQIMEEMLTQRIQWDRTIQSITERLKQVSPNSTQLIAIQPSQYVESLLAQWKVDIPTATHTSEDTMSAIMNLPLGSSPAKDAKSSKIAVVGMA…
Dothideomycetes	Alternaria_burnsii_HNLF_44_GCA_021613345.1	SAT-KS-AT-PT-xCP-xCP-Te	MNVLIFGDQTADQYPLLRKACTWKNNSTLTTFLDRVSQVVREEVQKLPRTQRDQIPNFLTTWDLVEAYYAKGLKIPQLESCMVTIAQLAHFIGYYAENPTDLQNPANTRVVGLCTGLLAGSVVASARSLSELLPLATEAVRIAFRTGTVVGAAKEAVEQASAPKETWSTIVTNMTEKAAKDAITAFHEEQQIPTLAQAYISAVSTMALTISGPPATTKRLLQGDAFKGCARVAIPVYAPYHAAHFYGSADIDQILDKDAIRHLQQFRPLSLVHSATTGKCHTATSTLDLIRSALTEILVEPVRWDNLLTEVVSQVTATASQDCSVSAIGVTTITNSLVSALRNGGQSSVTARDHTTWVAAEHDSRGRTQNDKIAIVGMSGRFPGAANPDALWDLLEKGL…
Dothideomycetes	Alternaria_cf._alternata_R_IC_06_P1_GCA_020284155.1	SAT-KS-AT-DH-xCP-xCP-MT	MRSQSSHFAPSVAFFCPQSKAPTEAYLEQLQRDTWNTLCKGHADIANLKSGERHVVSLERWITNGIAGPVSSSMSGILALPLLVVIQICQYFQLLELHKLTHEQMLSSLRNGGGAQGYCGGLPTAFAISCAKDEEDVVRLATKALRLAFAVGAFGELGDDESIEGATTIAVRLRASQQGEELVEGIPGCYISAITDPRTISIVGPVTELTKVADRARDQGLLVTDIHIRGKVHNPENAPLVKVLFDLCQEHDEMTLPDASQLRVPVRSNLSGKLLNNCSLTHEAINTILASRCEWYRLLKEVAQDLAGSGTDSHTFALFGIGDPVPLMPFHNARLRVAKVEAHTAIQEARLAEYKYPEDAIAVTGVSCRLPRANDLEELWQLLAAGTSTCEEIRHDRVP…
Dothideomycetes	Alternaria_cf._alternata_R_IC_06_P1_GCA_020284155.1	SAT-KS-AT-PT-xCP	MIRAKVLYFSGEIPQGDPEGDQQDLFRKLHLLSKERSHPILALFLETITRAVKEEQRQLIRTERDLIPAFESILDLTDHVIELRKTALGGAVERVLVLAFQLGSFIAYHEAHPLEYNFQSSDTFLIARGPGMLSAAAIALCPNVSMVPSIAGDIAKVAFRFGLVVDQVCRSLEISPDEINAAGAWIYCVYGVDPSEAQEAVALFNAEKEYAETSVASVFNDDGKSVSIGGPPSTLKTLFTECEFFKRTRNVPMKKVQGMWHTGKVYGMEHVQQVVPHIDEKHRLHLSLFSPVTGQPFEAANANELLEQIMEEMLTQRIRWDRTIQSVTERLKQVSPNSTQLIAIQPSQYVESLLAQWKADIPTATYTAKDMMSAIMNLPLGSSPAKDAKSSKIAVVGMA…
Dothideomycetes	Alternaria_cf._alternata_R_IC_06_P1_GCA_020284155.1	SAT-KS-AT-PT-xCP-xCP-Te	MNVLIFGDQTADQYPLLRKACTWKNNSTLTTFLDRVSQVVREEVQKLPRTQRDQIPNFLTTWDLIEAYYAKGLKIPQLESCMVTIAQLAHFIGYYAENPSDLQNPANTRVVGLCTGLLAGSVVASARSLSELLPLATEAVRIAFRTGTVVGAAKEAVEQASAPKETWSTIVTNMTEKAAKDAIAAFHEEQQTPTLAQAYISAVSTMALTISGPPATTKRLLQGDAFKGCARVAIPVYAPYHAAHFYSPADIDQILDKDAIRHLQQFRPLSLVHSATTGKCHTATSTLDLIRSALTEILVEPVRWDNLLTEVVSQVTATSSQDCSVSAIGVTTITNSLVSALRNGGQSSVTARDHTTWVAAEHDSRGRTQNDKIAIVGMSGRFPGAANPDALWDLLEKGL…
Dothideomycetes	Alternaria_conjuncta_BMP_0040_GCA_024043145.1	SAT-KS-AT-DH-xCP-xCP-MT	MRSQSDHFAPSVAFFCPQSKAPTEAYLEQLQKYIVETPLLLPFAEAITSLTDTWTILCDGHPDIAKLKSGKRHVVSLKRWITDGISGPVSSSMSGILALPLLVVIQICQYFQLLELHGLTHERMLASLKKGGGAQGYCGGLPTAFAVSCAKDEEEVVHLATKALRLAFAVGTFGELGDDELVEGATTIAVRLRTPPQGDELVAGIPRCYISAITDPKTISIVGPVLELEKVAERARNRGLLVTDIHIRGKVHNPENAPLVKVLFDICQEHDDMMLPDASQLRVPVRSNLDGSLLHDCSLTHEAINTILASRCEWYRLLKGVAQDLAGSGTDAHTFALFGIGDPVPLMPFHNARLRISKMEVHTTVQGARLAEYKYPEDAIAITGVSCRLPRAADLEELW…
Dothideomycetes	Alternaria_conjuncta_BMP_0040_GCA_024043145.1	SAT-KS-AT-PT-xCP-xCP-Te	MNVLIFGDQTADQYPLLRKACTWKNNSTLTSFLDRISQVVREEVQKLPRTQRDQIPNFLTTWDLIEAYYAKGLKVPQLESCMVTIAQLSHYIGYYAENPSDLKNPANTRVVGLCTGLLAGSVVASARSLSELLPLAIEAVRIAFRTGTVVGAAKEALEQTPVPKETWSTIVTSISEKAAKDAITAFHQEQRIPTLAQAYISAVSTMALTISGPPSTTKRLLQSDAFKGCTRVSIPVYAPYHAAHLYTEADIDQILDKDATRHLQQFRPLSLVHSASTGECHTATSTLDLIRTALSEILVESVRWDNLLSEVVSQVTATSSQDCSVSAIGVTSITNSLVSALKSGGQSSVTARDHTSWVAAEHDSRGRTQNDKIAIVGMSGRFPGAANPDALWDLLEKGL…
Dothideomycetes	Alternaria_conjuncta_DAOMC195272_GCA_040584035.1	SAT-KS-AT-DH-xCP-xCP-MT	MRSQSDHFAPSVAFFCPQSKAPTEAYLEQLQKYIVETPLLLPFAEAITSLTDTWTILCDGHPDIAKLKSGKRHVVSLKRWITDGISGPVSSSMSGILALPLLVVIQICQYFQLLELHGLTHERMLASLKKGGGAQGYCGGLPTAFAVSCAKDEEEVVHLATKALRLAFAVGTFGELGDDELVEGATTIAVRLRTPPQGDELVAGIPRCYISAITDPKTISIVGPVLELEKVAERARNRGLLVTDIHIRGKVHNPENAPLVKVLFDICQEHDDMMLPDASQLRVPVRSNLDGSLLHDCSLTHEAINTILASRCEWYRLLKGVAQDLAGSGTDAHTFALFGIGDPVPLMPFHNARLRISKMEVHTTVQGARLAEYKYPEDAIAITGVSCRLPRAADLEELW…
Dothideomycetes	Alternaria_conjuncta_DAOMC195272_GCA_040584035.1	SAT-KS-AT-PT-xCP-xCP-Te	MNVLIFGDQTADQYPLLRKACTWKNNSTLTSFLDRISQVVREEVQKLPRTQRDQIPNFLTTWDLIEAYYAKGLKVPQLESCMVTIAQLSHYIGYYAENPSDLKNPANTRVVGLCTGLLAGSVVASARSLSELLPLAIEAVRIAFRTGTVVGAAKEALEQTPVPKETWSTIVTSISEKAAKDAITAFHQEQRIPTLAQAYISAVSTMALTISGPPSTTKRLLQSDAFKGCTRVSIPVYAPYHAAHLYTEADIDQILDKDATRHLQQFRPLSLVHSASTGECHTATSTLDLIRTALSEILVESVRWDNLLSEVVSQVTATSSQDCSVSAIGVTSITNSLVSALKSGGQSSVTARDHTSWVAAEHDSRGRTQNDKIAIVGMSGRFPGAANPDALWDLLEKGL…
Dothideomycetes	Alternaria_consortialis_JCM_1940_GCA_001950455.1	SAT-KS-AT-PT-xCP-Te	MKTSHRTVLLFGDVTDPWVEGIDHVYVQAAKKPWIRSFLEDLFSAIKTETKVMDRVLQEGFKDSSSFQELAERYRHAGDDFGMAHAMMIYAIRAVVLLETLSREPHILDESRPRPEVIGISGGLFSAAVISISINFETLYAACIEAGRVWSRLCNLTLVRSRAMEESPGTWGWAILGIPAADLGKTLDQFQSSMGIHSSKRAKIGVIGDRWSTIIGPPSVLELTLSECPNLKNLPKNELNIHALQHTLSVSDSDIDYIVGNSPLLETPLPSGYRIHGLDDDFPEASYAEWRHLLRASAYQTLSRPLDIVQAVSNLNAALGASKDIEAKIIGPSSHTTYLVKCLQTAGKEVFVQNGFLASPQTSGTNDGIAIVGMAGKGPGSDDLEEFWNVILKGLDLHE…
Dothideomycetes	Alternaria_consortialis_JCM_1940_GCA_001950455.1	SAT-KS-AT-PT-xCP-xCP-Te	MNVLIFGDQTADQYPLLRKACTWKNNSTLTTFLDRVSQVVREEVQKLPRTQRDQIPNFLTTWDLIEAYYAKGLKVPQLESCMVTIAQLAHYIGYYAENPSDLQNAANTRVVGLCTGLLAGSVVASARSLSELLPLATEAVRIAFRTGTVVGAAKEALEQASATKETWSIIVTNMAEKAAKDAIAAFHEEQRTPVLAQAYISAVSTMALTISGPPATTKRLLQGDAFKGCARVAIPVYAPYHAAHLYAEADIDQILDKDAIRHLQQFRPLSLVHSASTGKCHTATSTLDLIRTAITEILVEPVRWDNLLTEVVSQVTATSSQDCSVSAIGVTTITNSLVSALRNGGQSSITARDHTTWVAAEHDSRGRTQNDKIAIVGMSGRFPGAANPDALWDLLEKGL…
Dothideomycetes	Alternaria_dauci_na_GCA_025504955.1	SAT-KS-AT-DH-xCP-MT	MRSQSSHFRPSVAFFCPQSKAPTEAYLEQLQKYIVGTPLLQPFAEAITSLKDTWGTLCEGHADIAKLQSGERHVASLERWITDGVAGPVSSSMSGILALPLLVVIQICQYFQLLELHDLTHEQMLASLRNGGGAQGYCGGLPTAFAVSCAKDEEDVVRLATNALRLAFAVGAFGELGDDESIEGATTIAVRLRASQQGEELVEGIPGCYISAITDPRTISIVGPVLELKKVADRARSQGLLVTDIHIRGKVHNPENAPLVKVLFNLCQEHDEMTLPDASQLRVPVRSNLTGKLLDNCSLTHEAINTILASRCEWYRLLKEVAEDLAGSGTEAHTFALFGIGDPVPLMPFHNARLRVSKVEAHTAIQEARLAEYRYPDDAIAVTGVACRLPRANDLEELW…
Dothideomycetes	Alternaria_dauci_na_GCA_025504955.1	SAT-KS-AT-PT-xCP	LFGLGTGLLSAAAASVSLNIADLAVAGAHIVRASFRLGIHVYNVSEQLEAPDADGNPWAFVIPGLTAEVVQAELDRYNRDTANLTLSHIFISASDKASVSVSGPPSRLRHCLKSCDVLRYSNFMPLPVHHGLCHAPHIYSAVDVQAIIEDILDDDHTRIAGLKTSLPLLSSSTGRPYPAKDFRSLIDQVLAELLMNKIHIDNVADGVIEVLDLPSASQQERNLFAFRNSVVLRTMMKNVEKQCDGRITFTHGDLVEWTKREESDAETPISPKRAKLAVVGMSCRLPGGANDHELFWKLMVDKRDVHTTIPPDRFDLSTHFDPTGQIENTTQTPYMNHIDSPGLFDAGFFNISPKEAEQIDPMHRLALVTAYEALEMSGYSPNRTRSTSSPRVGTYYGQA…
Dothideomycetes	Alternaria_dauci_na_GCA_025504955.1	SAT-KS-AT-PT-xCP	MTQPKVQRTIFLLGDATDSWVDGLDQVYTQAASTPWMKEFLQRMTSVVIAEARSAALDRPLQDGLGYFSSLRELGDRYRHMPDQLGVVQAILLHTVRATTILQWVKQEPELIGPNASTEWVGLSGGLLSVSALAIAHDFESLYDASLEVARLVLRVAKLASVKSRAMEEEPGTWGWAVIGVSPEALREALEQFQRTNAIIPRKAKVGVIGDGWSTVIGPPSLLKAFLAQSATVRDAAKNPLTIQAGQHALNTTTADLEYMVGHNSSFLDRRIACPKHRLWGMDKPSAQYANWREMVSEICTQVLSRPLDIRHVFGQVESALDNVNEVRVLQPGASSHAAYLAKVLGRPGRSVLTEDQKTLVAADDDTWLKPGRIAIVGMAGRGPGSDNVDEFWKLIMDK…
Dothideomycetes	Alternaria_dauci_na_GCA_025504955.1	SAT-KS-AT-PT-xCP	MSNMTRAKVLYFSGEIPQGDPEGDQRDLFRKLHLLNKERNYPILALFLETITEALKKERHRLTRAQRDLIPTFESILDLTDHVVELRKTSLGGAVERVLVLAFQLGSFIAYHEAHPLEYNFQPSDTFLIARGPGMLSAAAVALCPSVSMIPSIAGDIARVAFRFGVVVDQVCRSLEISPDEINAAGAWIYCVYGVDPSEAQEAVVRFNVEKAYAETSVASVFNDDGKSVSIGGPPSTLKTLFAECEFFKHTRNVPMKKVQGMWHTGKVYGVEHVQQIVPDIDGKHRLHLPLFSPVTGQPLEAANAKNLLEQIMEEMLTQRIRWDRTIQNVTERLKQVSPDCTQLLAIQPSQYVESLLAQWKADIPTATHTTEDMMSAIMNLPLGSSPAKDAKSSKIAVV…
Dothideomycetes	Alternaria_dauci_na_GCA_025504955.1	SAT-KS-AT-PT-xCP-xCP-Te	MNVLIFGDQTADQYPLLRKACTWKNNSTLTTFLDRVSQVVREEVQKLPRTQRDQIPNFLTTWDLVEAYYAKGLKIPQLESCMVTIAQLAHYIGYYAENPSDLQNPANTRVVGLCTGLLAGSVVASARSLSELLPLATEAVRIAFRTGTVVGAAKDAVEQASAPKETWSTIVTNMSEKAAKDAIAAFHQEQRTPTLAQAYISAVSTMALTISGPPATTKRLLEGDAFKGCARVAIPVYAPYHAAHFYGQADIDQILDKDAIRHLQQFRPLSLVHSASSGKCHTATSTLDLVRAALTEMLVEPVRWDNLLTEVVSQITATSSQDCSVSAIGVTTITNSLVSALRNGGQSSVTARDHTTWVTAEHDSRGRTQNDKIAIVGMSGRFPGAATPDALWDLLEKGL…
Dothideomycetes	Alternaria_dauci_na_GCA_025504955.1	Te-KS-AT-DH-MT-KR-xCP-C-A-xCP	MDQNPEVIQAHAGDHYTTPVFLIHDGGGTTFAYHCLDPLDRPVYGIFNPYFHTGEGFEGGICGMARLYAGIIRLAAVNPDFPAERDSGGRANILIGGWSLGGLLALEIAKILTGDRGVRIIGALMMDSIYPVNPPSMVRLGALDDMAAGEKSKNELLTLQAMKEALRVIQKWTPPVWAGTEVRPRFSLLRALDAMPATGIDGVHPADIHRSDPTLGWNAYDTSLFTDVEGIMQRLVFLRNMTDNFDQDRCCRSPIPSTLLFSTTLPVLYNMYEPVAIVGTACRFPGAASSTSKLWDLLKAPRDVLKEFPPERLNTANFYNENGDMHGRMNVEHKSYLLEEDVRHFDAAFFRINPKEAADMDPQQRLLLETVYEAFESAGWSLDDVSGSDTSVHVGTMTD…
Dothideomycetes	Alternaria_destruens_LH_A593_GCA_037044395.1	A-xCP-KS-AT-xCP	MVPENEFNLTDDPSKLGHNVVSLFEQIQSRYSPKPAIVCGDHTITYGVLASESDRLACLLLSRGISRGHVVALALDRTPDLIIFILGVLKAGAAYVPIDPALPSERVNQMLDDEALRLVIVSHASTKGMTSNCRCDYGHKAACCTTSELRDQMRYQADKKPAVDIQGDDLAYILYTSGSTGKPKGVEVHHAAICNYALSVHQRPGCTDQDRVLFRSTISFDMSAIEIYVPLLCGATVVQAQTYEIRDPRALIHLINHHAVTFAVTTPTILQMLLDSGWCGTPGLSKLLTGGEALSPRLAERLTACVEEVWNIYGPTETTMSVATWKVQVGEDILIGTPKANIRLYVLDADMRPVPVGGTGELYISGAGVARGYRNNPERTKAAFLPDPFWEGHTMYKSG…
Dothideomycetes	Alternaria_destruens_LH_A593_GCA_037044395.1	KR-KS-AT-DH-xCP-xCP-MT-Te	MANDELIHKLTWSPTALSKEPLSIAHVVFVVAEKESESLSAYQAQLANEGITTVVTDDAMKINPLITPKTIVVYIPPTAKSKEEIYAAATQACTSLINVAQQLYHRSISAKSKTVKLFSIVPKDWGIGDLVYAPLHGLSRVLKTEIPEIMAALKYAQGFDVVRICEGEAQVAYLQPFTDELSDKKELQLHANSSYLITGGTGGIGLATAAWLAQRGARNIVLVSRRGLPPSSDSKAVEANSADLISRIAKLKAVGVSVHVLAVDISKPNADVTLSQTINDLDIPPIKGVIHAAGTAGYHTLTRCTPTDIADNLAPKVIGSLNLDALFPPGTLDFFVFTSSVGQLVGFPGQLAYAPSNAFLDALAAHRRRQGDNSMAILWAGWQGTGVWDQSKSAMRRLN…
Dothideomycetes	Alternaria_destruens_LH_A593_GCA_037044395.1	SAT-KS-AT-PT-xCP	MSAPTKLVFFGNEFPNDDLKTLFRGLHRHSKDRRFRQLATFLEESTRVLQNEVAQLPEPLKKLVPHFENLMPLTEVDFRQGPLGAAMESALLTILELGMFIGHYEAEERAWDLSADRTTLAGLSIGLLAAAGVALSTHLAEVVQNGAECVRVSFRLGVYVHDISRKLEAPQADGSLLSWAHVVTGESASDLQEELSRYNTETGTPELLKVFISAADKTSVSVSGPPSRIRAAFRASQRLRYSKSLALPVYDGLCHAAHLYDEETIHRVLHPDGSVIPTSRPVQLALLSSRSGQPFEATTAAELFRAISTELLTGTIFLDNITAGILDRTERCADTTKCQIETYRTSLVFKGLLKALEACFPDRTISTTDLIPWVFQDYGARQPKSCADSKLAIVGMACR…
Dothideomycetes	Alternaria_destruens_LH_A593_GCA_037044395.1	SAT-KS-AT-PT-xCP-xCP-Te	MSKMETVAEVFIFGDQTVAFESTLHSLLHVKDNAVLTDFFDRVGYQLRRYVGNLPLHQQEWFPYFTTLIDLLAQHENCHAAPALKLPLLCATELGQFIRHYGQAGRTYPAPESTFLIGACTGAFAAAAVATSQTLAELVPAAVEAVTVAFRTALRSLILRNDLELNIDGSQKSWSAIVGVCEPEAASAIRCFNVEKGLPPIARLYLSSVSRTNVSISGPPRLLGQFLLSCAWKHSLLPIELPYHASHLFRKDDVEIIVGDFHDFSLLKYTQRTKVICAVSGEVVVASDLRSLLHRAVQEALCEPLQWNCIAASLSRELKQCQLTECVINQVSTRSGSLISSALSQEAFLGVKIVQSIGDVAVSPALSSPTGKFSQSSIAIIGFSGRFPESDSNEEFWEM…
Dothideomycetes	Alternaria_destruens_LH_A593_GCA_037044395.1	SAT-KS-AT-PT-xCP-xCP-Te	MEGPSRVYLFGDQTSDIEAGLRRLLQAKNSTIVQSFFQQCFHAIRQEIAKLPPSQRKLFPRFTSIVDLLSRSRESGPSPVLESALTCIYQLGCFIHFYGDLGHDYPTPSNSHLVGLCTGVLSCTAVSCAKNVGELIPAAVEAIVIALRLGICVFRVRELVASADSESTCWSALVSGISEAEASRLIDEYSSKKATPPSSKPYISAVSSNGVTVSAPPTILDEFVETCISKNYKPVKAPIHGPYHAPHLYDDKDIERILHQSSALEELTGWSPAIPVISSNTGKPIKATSIKDLFKVALEEILLRRLCWDKVTESCTSVCKTCKNHSCKLFPISSSATQSLFTVLKKAGVSISLETGVGEIAINPETRNLTGKAENSKIAIIGMSGRFPESDGTEAFWDL…
Dothideomycetes	Alternaria_ethzedia_DAOMC238797_GCA_040583925.1	SAT-KS-AT-DH-xCP-xCP-MT	MRTQSDHFAPSVAFFCPQSKAPTEAYLEQLQKYIVETPLLLPFAEAITSLTDTWTILCDGHPDIAKLKSGKRHVVSLKRWITDGISGPVSSSMSGILALPLLVVIQICQYFQLLELHGLTHERMLASLKKGGGAQGYCGGLPTAFAVSCAKDEEEVVHLATKALRLAFAVGAFGELGDDELVEGATTIAVRLRTPPQGDELVAGIPRCYISAITDPKTISIVGPVLELEKVAERARNRGLLVTDIHIRGKVHNPENAPLVKVLFDICREHDDMMLPDASQLRVPVRSNLDGSLLHDCSLTHEAINTILASRCEWYRLLKDVAQDLAGSGTDAHTFALFGIGDPVPLMPFHNARLRISKMEVHTTVQGARLAEYKYPEDAIAITGVSCRLPRAADLEELW…
Dothideomycetes	Alternaria_ethzedia_DAOMC238797_GCA_040583925.1	SAT-KS-AT-PT-xCP-xCP-Te	MNVLIFGDQTADQYPLLRKACTWKNNSTLTSFLDRVSQVVREEVQKLPRTQRDQIPNFLTTWDLIEAYYAKGLKVPQLESCMVTIAQLSHYIGYYAENPSDLKNPANTRVVGLCTGLLAGSVVASARSLSELLPLAIEAVRIAFRTGTVVGAAKEALEQTPVPKETWSTIVTSISEKAAKDAITAFHQEQRIPTLAQAYISAVSTMALTISGPPSTTKRLLQSDAFKGCTRVSIPVYAPYHAAHLYTEADIDQILDKDATRHLQQFRPLSLVHSASTGECHTATSTLDLIRTALSEILVESVRWDNLLSEVVSQVTATSSQDCSVSAIGVTSITNSLVSALKSGGQSSVTARDHTSWVAAEHDSRGRTQNDKIAIVGMSGRFPGAANPDALWDLLEKGL…
Dothideomycetes	Alternaria_gaisen_FERA_650_GCA_004156025.2	SAT-KS-AT-PT-xCP-xCP-Te	MNVLIFGDQTADQYPLLRKACTWKNNSTLTTFLDRVSQVVREEVQKLPRTQRDQIPNFLTTWDLIEAYYAKGLKIPQLESCMVTIAQLAHFIGYYAENPSDLQNPANTRVVGLCTGLLAGSVVASARSLSELLPLATEAVRIAFRTGTVVGAAKEAVEQASAPKETWSTIVTNMTEKAAKDAITAFHEEQQTPTLAQAYISAVSTMALTISGPPATTKRLLQGDAFKGCARVAIPVYAPYHAAHFYNSADIDQILDKDAIRHLQQFRPLSLVHSAATGKCHTATSTLDLIRSALTEILVEPVRWDNLLTEVVSQVTATSSQDCSVSAIGVTTITNSLVSALRNGGQSSVTARDHTTWVAAEHDSRGRTQNDKIAIVGMSGRFPGAANPEALWDLLEKGL…
Dothideomycetes	Alternaria_hordeiaustralica_BMP_2776_GCA_023758085.1	SAT-KS-AT-DH-xCP-xCP-MT	MRTQSDHFAPSVAFFCPQSKAPTEAYLEQLQKYIVETPLLLPFAEAITSLTDTWTILCDGHPDIAKLKSGKRHVVSLKRWITDGISGPVSSSMSGILALPLLVVIQICQYFQLLELHGLTHERMLASLKKGGGAQGYCGGLPTAFAVSCAKDEEEVVHLATKALRLAFAVGAFGELGDDELVEGATTIAVRLRTPPQGDELVAGIPRCYISAITDPKTISIVGPVLELEKVAERARNRGLLVTDIHIRGKVHNPENAPLVKVLFDICQEHDDMMLPDASQLRVPVRSNLDGSLLHDCSLTHEAINTILASRCEWYRLLKDVAQDLAGSGTDAHTFALFGIGDPVPLMPFHNARLRISKMEVHTTVQGARLAEYKYPEDAIAITGVSCRLPRAADLEELW…
Dothideomycetes	Alternaria_hordeiaustralica_BMP_2776_GCA_023758085.1	SAT-KS-AT-PT-xCP-xCP-Te	MNVLIFGDQTADQYPLLRKACTWKNNSTLTSFLDRVSQVVREEVQKLPRTQRDQIPNFLTTWDLIEAYYAKGLKVPQLESCMVTIAQLSHYIGYYAENPSDLKNPANTRVVGLCTGLLAGSVVASARSLSELLPLAIEAVRIAFRTGTVVGAAKEALEQTPIPKETWSTIVTSISEKAAKDAITAFHQEQRIPTLAQAYISAVSTMALTISGPPSTTKRLLQSDAFKSCTRVSIPVYAPYHAAHLYTEADIDQILDKDATRHLQQFRPLSLVHSASTGECHTATSTLDLIRTALSEILVESVRWDNLLSEVVSQVTATSSQDCSVSAIGVTSITNSLVSALKSGGQSSVTARDHTSWVAAEHDSRGRTQNDKIAIVGMSGRFPGAANPDALWDLLEKGL…
Dothideomycetes	Alternaria_incomplexa_BMP_0042_GCA_024043165.1	SAT-KS-AT-DH-xCP-xCP-MT	MRSQSDHFAPSVAFFCPQSKAPTEAYLEQLQKYIVETPLLLPFAEAITSLTDTWTILCDGHPDIAKLKSGKRHVVSLKRWITDGISGPVSSSMSGILALPLLVVIQICQYFQLLKLHGLTHERMLASLKKGGGAQGYCGGLPTAFAVSCAKDEEEVVHLATKALRLAFAVGAFGELGDDELVEGATTIAVRLRTPPQGDELVAGIPRCYISAITDPKTISIVGPVLELEKVAERARNRGLLVTDIHIRGKVHNPENAPLVKVLFDICREHDDMMLPDASQLRVPVRSNLDGSLLHDCSLTHEAINTILASRCEWYRLLKDVAQDLAGSGTDAHTFALFGIGDPVPLMPFHNARLRISKMEVHTTVQGARLAEYKYPEDAIAITGVSCRLPRAADLEELW…
Dothideomycetes	Alternaria_incomplexa_BMP_0042_GCA_024043165.1	SAT-KS-AT-PT-xCP-xCP-Te	MNVLIFGDQTADQYPLLRKACTWKNNSTLTSFLDRVSQVVREEVQKLPRTQRDQIPNFLTTWDLIEAYYAKGLKVPQLESCMVTIAQLSHYIGYYAENPSDLKNPANTRVVGLCTGLLAGSVVASARSLSELLPLAIEAVRIAFRTGTVVGAAKEALEQTPVPKETWSTIVTSISEKAAKDAITAFHQEQRIPTLAQAYISAVSTMALTISGPPSTTKRLLQSDAFKGCTRVSIPVYAPYHAAHLYTEADIDQILDKDATRHLQQFRPLSLVHSASTGECHTATSTLDLIRTALTEILVESVRWDNLLSEVVSQVTATSSQDCSVSAIGVTSITNSLVSALKSGGQSSVTARDHTSWVAAEHDSRGRTQNDKIAIVGMSGRFPGAANPDALWDLLEKGL…
Dothideomycetes	Alternaria_longipes_CBS_540.94_GCA_019059555.1	SAT-KS-AT-PT-xCP	MIQAKVLYFSGEIPQGDPEGDQRDLFRKLHLLSKERSYPILALFLETITQAVKEEQRRLIRTDRDLIPIFESILDLTDHVVELRKTSLGGAVERVLVLAFQLGSFIAYHEAHPFEYNFQPSDTFLIARGPGMLSAAAIALCPNVSMVPSIAGDIAKVAFRFGLVVDQVCRSLEISPGEINAAGAWIYCVYGVDPSEAQGAVALFNAEKEYAETSVASVFNDDGKSVSIGGPPSTLKALFTECEFFKRTRNVPMKKVQGMWHTGKVYGMEHVQQVVPHIDEKHRLHLSLFSPVTGEPFEAANANELLEQVMEEMLTQRIRWDRTIQSVTERLKQVSPNSTQLIAIQPSQYVESLLAQWKGDIPTATHTAEDMMSAIMNLPLGSSPAKDAKSSKIAVVGMA…
Dothideomycetes	Alternaria_longipes_CBS_540.94_GCA_019059555.1	SAT-KS-AT-PT-xCP-xCP-Te	MNVLIFGDQTTDQYPLLRKACTWKNNSTLTTFLDRVSQVVREEVQKLPRTQRDQIPNFLTTWDLIEAYYAKGLKIPQLESCMVTIAQLAHFIGYYAENPSDLQNPANTRVVGLCTGLLAGSVVASARSLSELLPLATEAVRIAFRTGTVVGAAKEAVEQASAPKETWSTIVTNMTEKAAKDAIAAFHEEQQTPTLAQAYISAVSTMALTISGPPATTKRLLQGDAFKGCARVAIPVYAPYHAAHFYSPADIDQILDKDAIRHLQQFRPLSLVHSATTGKCHTATSTLDLIRSALTEILVEPVRWDNLLTEVVSQVTATSSQDCSVSAIGVTTITNSLVSALRNGGQSSVTARDHTTWVAAEHDSRGRTQNDKIAIVGMSGRFPGAANPDALWDLLEKGL…
Dothideomycetes	Alternaria_metachromatica_BMP_0045_GCA_023757995.1	SAT-KS-AT-DH-xCP-MT	MASAHVLPSMLIFGPQAELPSDAVMANLRDDLVNNRSLSTLVAAIEDLQQFWTALVDFDPRLNDAQGGKTLNELQYWLHSGQLPDRNRDLPNLLTVPMTVILQITQYARYIAGLELKHPHVHILAELKEAGVQGFCIGFLSAIIIAAARNEAEIGVIAATMLRLAVCIGAYVDKNVGYGESSSPSACIAVRWKDDSVRGREEVDVIVQQFKEAYISSINDQASVTVTAKHSDIADLRDSCRSRGLRVSTLCVNGRFHTGVHLPAVEHISAFAKDRDDMQLPSTDRLHLPVRSTVDGTVIREGALIRHILENTLSEQVNWYAAVQAAAAPLKEDTAPVVVFVGTGSHVPASLLPDPRFQTISLGATIANKAASTPHVASPLANVNAQSEYPPNSIAIVGM…
Dothideomycetes	Alternaria_metachromatica_BMP_0045_GCA_023757995.1	SAT-KS-AT-DH-xCP-xCP-MT	MRSQSDHFAPSVAFFCPQSKAPTEAYLEQLQKYIVETPLLLPFAEAITSLTDTWTILCDGHPDIAKLKSGKRHVVSLKRWITDGISGPVSSSMSGILALPLLVVIQICQYFQLLELHGLTHERMLASLKKGGGAQGYCGGLPTAFAVSCAKDEEEVVHLATKALRLAFAVGAFGELGDDELVEGATTIAVRLRTPPQGDELVAGIPRCYISAITDPKTISIVGPVLELEKVAERARNRGLLVTDIHIRGKVHNPENAPLVKVLFDICQEHDGMMLPDASQLRVPVRSNLDGSLLHDCSLTHEAINTILASRCEWYRLLKDVAQDLAGSGTDAHTFALFGIGDPVPLMPFHNARLRISKMEVHTTVQGARLAEYKYPEDAIAITGVSCRLPRAADLEELW…
Dothideomycetes	Alternaria_metachromatica_BMP_0045_GCA_023757995.1	SAT-KS-AT-PT-xCP-xCP-Te	MNVLIFGDQTADQYPLLRKACTWKNNSTLTSFLDRVSQVVREEVQKLPRTQRDQIPNFLTTWDLIEAYYAKGLKVPQLESCMVTIAQLSHYIGYYAENPSDLKNPANTRVVGLCTGLLAGSVVASARSLSELLPLAIEAVRIAFRTGTVVGAAKEALEQTPIPKETWSTIVTSISEKAAKDAITAFHQEQRIPTLAQAYISAVSTMALTISGPPSTTKRLLQSDAFKSCTRVSIPVYAPYHAAHLYTEADIDQILDKDATRHLQQFRPLSLVHSASTGECHTATSTLDLIRTALSEILVESVRWDNLLSEVVSQVTATSSQDCSVSAIGVTSITNSLVSALKSGGQSSVTARDHTSWVAAEHDSRGRTQNDKIAIVGMSGRFPGAANPDALWDLLEKGL…
Dothideomycetes	Alternaria_oregonensis_DAOMC238619_GCA_040583965.1	SAT-KS-AT-DH-xCP-xCP-MT	MRSQSDHFAPSVAFFCPQSKAPTEAYLEQLQKYIVETPLLLPFAEAITSLTDTWTILCDGHPDIAKLKSGKRHVVSLKRWITDGISGPVSSSMSGILALPLLVVIQICQYFQLLELHGLTHERMLASLKKGGGAQGYCGGLPTAFAVSCAKDEEEVVHLATKALRLAFAVGAFGELGDDELVEGATTIAVRLRTPPQGDELVAGIPRCYISAITDPKTISIVGPVLELEKVAERARNRGLLVTDIHIRGKVHNPENAPLVKVLFDICREHDDMMLPDASQLRVPVRSNLDGSLLHDCSLTHEAINTILASRCEWYRLLKDVAQDLAGSGTDAHTFALFGIGDPVPLMPFHNARLRISKMEVHTTVQGARLAEYKYPEDAIAITGVSCRLPRAADLEELW…
Dothideomycetes	Alternaria_oregonensis_DAOMC238619_GCA_040583965.1	SAT-KS-AT-PT-xCP-xCP-Te	MNVLIFGDQTADQYPLLRKACTWKNNSTLTSFLDRVSQVVREEVQKLPRTQRDQIPNFLTTWDLIEAYYAKGLKVPQLESCMVTIAQLSHYIGYYAENPSDLKNPANTRVVGLCTGLLAGSVVASARSLSELLPLAIEAVRIAFRTGTVVGAAKEALEQTPVPKETWSTIVTSISEKAAKDAITAFHQEQRIPTLAQAYISAVSTMALTISGPPSTTKRLLQGDAFKGCTRVSIPVYAPYHAAHLYTEADIDQILDKDATRHLQQFRPLSLVHSASTGECHTATSTLDLIRTALSEILVESVRWDNLLSEVVSQVTATSSQDCSVSAIGVTSITNSLVSALKSGGQSSVTARDHTSWVAAEHDSRGRTQNDKIAIVGMSGRFPGAANPDALWDLLEKGL…
Dothideomycetes	Alternaria_panax_BNCC115425_GCA_019702505.1	SAT-KS-AT-DH-xCP-MT	MAIHSTPSVAFFCPQSKAPTEAYLGQLQKYILDTPLLQPFAEAITSLRDTWSTLCEGHPDIAKLKSGERHVVSLERWITDGIAGPVSSSMSGILALPLLVVIQICQYFQLLELHGLTHEQMLSNLRNGGGAQGYCGGLPTAFAISCAEDEEDVVRLATKALRLAFAIGAFGELGDDESIEGATTIAVRLRASQQGDELIEGIAGCYISAITDPRTISIVGPVLELKKVAGRARDQGLLVTDIHIRGKVHNPENAPLVKVLFDLCQEHEEMALPRASQLRIPVRSNLNGKLLDDCSLTHEAINTILASRCEWYRLLKEVAQDLVGSGTDSHTFALFGIGDPVPLMPFHNARLRVSKVEAHTAIQEARLAEYKYPEDAIAITGVSCRLPRANDLEQLWQLL…
Dothideomycetes	Alternaria_panax_BNCC115425_GCA_019702505.1	SAT-KS-AT-PT-xCP-xCP-Te	MNVLIFGDQTADQYPLLRKACTWKNNSTLTTFLDRVSQVVREEVQKLPRTQRDQIPNFLTTWDLIEAYYAKGLKVPQLESCMVTIAQMAHYIGYYAENPSDLQNPANTRVVGLCTGLLAGSVVASARSLSELLPLATEAVRIAFRTGTVVGAAKEAVEQTSVPKETWSTIVTNMTEQAAKDAIAAFHEEQRTPTLAQAYISAVSTMALTISGPPATTKRLLQGDAFKGCARVAIPVYAPYHAAHFYSDADIDQILDKDAIRHLQQFRPLSLVHSASTGKCHTATSTLDLIRTAITEILVEPVRWDNLLTEVVSQVTATSSQDCSVSAIGVTTITNSLVSALRNGGQSSVTARDHTSWVAAEHDSRGRTQNDKIAIVGMSGRFPSAANPDALWELLEKGL…
Dothideomycetes	Alternaria_porri_na_GCA_029783965.1	SAT-KS-AT-PT-xCP	MIRAKVLYFSGEIPQGDPEGDQRDLFRKLHLLSKERSYPILALFLETITRAVREEQRRLIRTERDSIPAFESILDLTDHVVELRKTSLGGAIERVLVLSFQLGSFIAYHEAHPLEYNFQSSDTFLIARGPGMLSAAAITLCPNMSMVPSIAGHIAKVAFRFGLVVDQVCRSLEISPDEINAAGAWIYCVYGVDPSEAQEAVALFNAEKEYAETSVASVFNDDGKSVSIGGPPSTLKALFTECEFFKRTRNVPMKKVQGMWHTGKVYGMEHVQQIVPYIDEKYRLHLSLFSPVTGQPFKAASANELLEQIMEEMLTQRIRWDRTIQSITERLKQVSPNSTQLIAIQPSQYVESLLAQWKADIPTATHTSEDTMSAIMNLPLGSSPSKDAKSSKIAVVGMA…
Dothideomycetes	Alternaria_porri_na_GCA_029783965.1	SAT-KS-AT-PT-xCP-xCP-Te	MNVLIFGDQTADQYPLLRKACTWKNNSTLTTFLDRVSQVVREEVQKLPRTQRDQIPNFLTTWDLVEAYYAKGLKIPQLESCMVTIAQLAHFIGYYAENPSDLQNPANTRVVGLCTGLLAGSVVASARSLSELLPLATEAVRIAFRTGTVVGAAKEAVEQASAPKETWSTIVTNMTEKAAKDAITAFHEEQQIPTLAQAYISAVSTMALTISGPPATTKRLLQGDAFKGCARVAIPVYAPYHAAHFYGSADIDQILDKDAIRHLQQFRPLSLVHSATTGKCHTATSTLDLIRSALTEILVEPVRWDNLLTEVVSQVTATASQDCSVSAIGVTTITNSLVSALRNGGQSSVTARDHTTWVAAEHDSRGRTQNDKIAIVGMSGRFPGAANPDALWDLLEKGL…
Dothideomycetes	Alternaria_rosae_BMP_2777_GCA_024043135.1	SAT-KS-AT-DH-xCP-xCP-MT	MRSQSDHFAPSVAFFCPQSKAPTEVYLEQLQKYIVETPLLLPFAEAITSLTDTWTILCDGHPDIAKLKSGKRHVVSLKRWITDGISGPVSSSMSGILALPLLVVIQVCQYFQLLELHGLTHERMLANLKKGGGAQGYCGGLPTAFAVSCAKDEEEVVHLATKALRLAFAVGAFGELGDDELMEGATTIAVRLRTPPQGDELVAGISRCYISAITDPKTISIVGPVLELEKVAERARNWGLLVTDIHIRGKVHNPENAPLVKVLFDICQEHDEMTLPDASQLQVPVRSNLDGSLLHDCSLTYEAINTILASRCEWYRLLKDVAKDLAGSGTDAHTFALFGIGDPVPLMPFHNARLRISKVEAHTTVQEARLAEYKYPEDAIAITGASCRLPRAADLEELW…
Dothideomycetes	Alternaria_rosae_BMP_2777_GCA_024043135.1	SAT-KS-AT-PT-xCP-xCP-Te	MNVLIFGDQTADQYPLLRKACTWKNNSTLTSFLDRVSQVVREEVQKLPRTQRDQIPNFLTTWDLIEAYYAKGLKVPQLESCMVTIAQLSHYIGYYAENPSDLQNPANTRVVGLCTGLLAGSVVASARSLSELLPLAIEAVRIAFRTGTVVGAAKEALEQTPAPKETWSTIVTSISEKAAKDAITAFHQEQRIPTLAQAYISAVSTMALTISGPPATTKRLLQSDAFKGCTRVSIPVYAPYHAAHLYTEADIDQILDKDATRHLQQFRPLSLVHSASSGECHTATSTLDLIRTALGEILVQSVRWDNLLSEVVSQVTATSSQDCSVSAIGVTSITNSLVSALKSGGQSSVTARDHSSWVAAEHDSRGRTQNDKIAIVGMSGRFPGAANPDALWDLLEKGL…
Dothideomycetes	Alternaria_rosae_MPI_PUGE_AT_0040_GCA_020736505.1	SAT-KS-AT-DH-xCP-xCP-MT	MRSQSDNFAPSVAFFCPQSKAPTEAYLEQLQKYIVETPLLLPFAEAITSLTDTWTILCDGHPDIAKLKSGKRHVVSLKRWITDGISGPVSSSMSGILALPLLVVIQVCQYFQLLELHGLTHERMLANLKKGGGAQGYCGGLPTAFAVSCAKDEEELVYLATKALRLAFAVGAFGELGDDELMEGATTIAVRLRTPPQGDELVAGISRCYISAITDPKTISIVGPVLELEKVAERARNWGLLVTDIHIRGKVHNPENAPLVKVLYEICQEHDEMTLPDASQLRVPVRSNLDGSLLHDCSLTYEAINTILASRCEWYRLLKDVAKDLAGSGTDAHTFTLFGIGDPVPLMPFHNARLRISKVEAHTTVQEARLAEYKYPEDAIAITGASCRLPRAADLEELW…
Dothideomycetes	Alternaria_rosae_MPI_PUGE_AT_0040_GCA_020736505.1	SAT-KS-AT-PT-xCP-xCP-Te	MNVLIFGDQTADQYPLLRKACTWKNNSTLTSFLDRVSQVVREEVQKLPRTQRDQIPNFLTTWDLIEAYYAKGLKVPQLESCMVTIAQLSHYIGYYAENPSDLQNPANTRVVGLCTGLLAGSVVASARSLSELLPLAIEAVRIAFRTGTVVGAAKEALEQTPAPKETWSTIVTSISEKAAKDAITAFHQEQRIPTLAQAYISAVSTMALTISGPPATTKRLLQSDAFKGCTRVSIPVYAPYHAAHLYTEADIDQILDKDATRHLQQFRPLSLVHSASSGECHTATSTLDLIRTALGEILVESVRWDNLLSEVVSQVTATSSQDCSVSAIGVTSITNSLVSALKNGGQSSVTARDHSSWVAAEHDSRGRTQNDKIAIVGMSGRFPSAANPDALWDLLEKGL…
Dothideomycetes	Alternaria_solani_HWC_168_2012p_GCA_002837235.1	SAT-KS-AT-DH-xCP-MT	MRSQSSHFRPSVAFFCPQSRAPTEAYLEQLQKYIVGTPLLQPFAEAITSLRDTWGILCKGHADIAKLQSGERHVASLERWITDGVAGPVSSSMSGILALPLLVVIQICQYFQLLELHDLTHEQMLASLRNGGGAQGYCGGLPTAFAVSCAKDEEDVVRLATNALRLAFAVGAFGELGDNESIEGATTIAVRLRASQQGEELVEGIPGCYISAITDPRTISIVGPVLELKKVADRARGQGLLVTDIHIRGKVHNPENAPLVKVLFDLCQEHDEMTLPDASQLRVPVRSNLTGKLLDDCSLTHEAINTILASRCEWYRLLKEVAEDLAGSSTEAHTFALFGIGDPVPLMPFHNARLRVSKVEAHTAIQEARLAEYRYPDDAIAVTGVACRLPRANDLEELW…
Dothideomycetes	Alternaria_solani_HWC_168_2012p_GCA_002837235.1	SAT-KS-AT-PT-xCP	MPSSSSWDSMEDAKPSLLFFNNDLPSDDINHLYRVLHRRTAQLSCPQLAHFITLCNQVITEEIAKLPKQRQENVPDFVNVLSLVNDDAFRKGPLGGAMEGVFLNILQIGMILGHHEVEQVPYQFNPKTTTLFGLGTGLLSAAAASVSLNIADLAVAGAHIARASFRLGIHVYNVSEQLEAPDADGNPWAFVIPGLTAEVVQAELDRYNCDTANPTLSHIFISASDKASVSVSGPPSRLRHCLKSCDVLRYSNFMPLPVHHGLCHAPHIYSAVDVQAIIEDILDDDHTRIAGLKTSLPLLSSSTGRPYPAKDFRSLIDQVLAELLMNKIHIDNVADGVIEVLDLPPASQQERSLFAFRNSVVLRTIMKNVEKQCDGRITFTHRDLVEWTKREESDAETPI…
Dothideomycetes	Alternaria_solani_HWC_168_2012p_GCA_002837235.1	SAT-KS-AT-PT-xCP	MTRAKVLYFSGEIPQGDPEGDQRDLFRKLHLLSKERSFPILALFLETITEAVKKERLRLTRAQRDLIPTFESILDLTDHVVELRKTSLGGAVERVLVLAFQLGSFIAHHEAHPLEYNFQPSDTFLIARGPGMLSAAAVALCPSVSMIPSIAGDIARVAFRFGVVVDQVCRSLETSPDEINAAGAWIYCVYGVDPSEAQEAVARFNVLKAYAETSVASVFNDDGKSVSIGGPPSTLKTLFAECEFFKHTRNVPMKKVQGMWHTGKVYGVEHVQQIVPDIHGKHRLHLPLFSPVTGQPLEAANAKDLLEQIMEEMLTQRIRWDRTIQNVTERLKQVSPDCTQLLAIQPSQYVESLLAQWKADIPTATHTTEDMMSAIMNLPLGSSPAKDAKSSKIAVVGMA…
Dothideomycetes	Alternaria_solani_HWC_168_2012p_GCA_002837235.1	SAT-KS-AT-PT-xCP-Te	MEGIDHVYVQAAKKPWIRSFLEDLSSAIKTETKAMDRVLQEGFKDSSSFQELAERYRHAGDDFGMAHAMMIYAIRAVVLLETLSREPHILDESRPRPEVIGISGGLFSAAVMSISINFETLYAACIEAGRVWSRLCNLTLVRSRAMEESPGTWGWAILGIPASDLGKTLEQFQSSMGIPCSKIAKVGVIGDRWSTIIGPPSVLELTLSECPNLKNLPKDELNIHALQHTLSVSDSDIDYIVGNSPLLETPLPPGYRIHGLDDDFPEASYAEWRHLLRASAYQTLSRPLDIVQAVSNLNAALGASKDIEAKIIGPSSHTTYLAKCLQTAGKEVLIQNGFLASPQTSGTNDGIAIVGMAGKGPGSDDLEEFWNVILKGLDLHEEVPSDRFNLEEYYSPKHP…
Dothideomycetes	Alternaria_solani_HWC_168_2012p_GCA_002837235.1	SAT-KS-AT-PT-xCP-xCP-Te	MNVLIFGDQTADQYPLLRKACTWKNNSTLTTFLDRVSQVVREEVQKLPRTQRDQIPSFLTTWDLVEAYYAKGLKIPQLESCMVTIAQLAHYIGYYSENPSDLQNPANTRVVGLCTGLLAGSVVASARSLSELLPLATEAVRIAFRTGTVVGAAKDAVEQASAPKETWSTIVTNMTEKAAKDAIAAFHQEQRTPTLAQAYISAVSTMALTISGPPATTKRLLQGDAFKGCARVAIPVYAPYHAAHIYGQADIDQILDKDAIRHLQQFRPLSLVHSASSGKCHTATSTLDLIRAALTEMLVEPVRWDNLLTEVVSQITATSSQDCSVSAIGVTTITNSLVSALRNGGQSSVTARDHTTWVAAEHDSRGRTQNDKIAIVGMSGRFPGAATPDALWDLLEKGL…
Dothideomycetes	Alternaria_solani_na_GCA_002952155.1	SAT-KS-AT-DH-xCP-MT	MRSQSSHFRPSVAFFCPQSRAPTEAYLEQLQKYIVGTPLLQPFAEAITSLRDTWGILCKGHADIAKLQSGERHVASLERWITDGVAGPVSSSMSGILALPLLVVIQICQYFQLLELHDLTHEQMLASLRNGGGAQGYCGGLPTAFAVSCAKDEEDVVRLATNALRLAFAVGAFGELGDNESIEGATTIAVRLRASQQGEELVEGIPGCYISAITDPRTISIVGPVLELKKVADRARGQGLLVTDIHIRGKVHNPENAPLVKVLFDLCQEHDEMTLPDASQLRVPVRSNLTGKLLDDCSLTHEAINTILASRCEWYRLLKEVAEDLAGSSTEAHTFALFGIGDPVPLMPFHNARLRVSKVEAHTAIQEARLAEYRYPDDAIAVTGVACRLPRANDLEELW…
Dothideomycetes	Alternaria_solani_na_GCA_002952155.1	SAT-KS-AT-PT-xCP	MTRAKVLYFSGEIPQGDPEGDQRDLFRKLHLLSKERSFPILALFLETITEAVKKERLRLTRAQRDLIPTFESILDLTDHVVELRKTSLGGAVERVLVLAFQLGSFIAHHEAHPLEYNFQPSDTFLIARGPGMLSAAAVALCPSVSMIPSIAGDIARVAFRFGVVVDQVCRSLETSPDEINAAGAWIYCVYGVDPSEAQEAVARFNVLKAYAETSVASVFNDDGKSVSIGGPPSTLKTLFAECEFFKHTRNVPMKKVQGMWHTGKVYGVEHVQQIVPDIHGKHRLHLPLFSPVTGQPLEAANAKDLLEQIMEEMLTQRIRWDRTIQNVTERLKQVSPDCTQLLAIQPSQYVESLLAQWKADIPTATHTTEDMMSAIMNLPLGSSPAKDAKSSKIAVVGMA…
Dothideomycetes	Alternaria_solani_na_GCA_002952155.1	SAT-KS-AT-PT-xCP	MPSSSSWDSMEDAKPSLLFFNNDLPSDDINHLYRVLHRRTAQLSCPQLAHFITLCNQVITEEIAKLPKQRQENVPDFVNVLSLVNDDAFRKGPLGGAMEGVFLNILQIGMILGHHEVEQVPYQFNPKTTTLFGLGTGLLSAAAASVSLNIADLAVAGAHIARASFRLGIHVYNVSEQLEAPDADGNPWAFVIPGLTAEVVQAELDRYNCDTANPTLSHIFISASDKASVSVSGPPSRLRHCLKSCDVLRYSNFMPLPVHHGLCHAPHIYSAVDVQAIIEDILDDDHTRIAGLKTSLPLLSSSTGRPYPAKDFRSLIDQVLAELLMNKIHIDNVADGVIEVLDLPPASQQERSLFAFRNSVVLRTIMKNVEKQCDGRITFTHRDLVEWTKREESDAETPI…
Dothideomycetes	Alternaria_solani_na_GCA_002952155.1	SAT-KS-AT-PT-xCP-Te	MEGIDHVYVQAAKKPWIRSFLEDLSSAIKTETKAMDRVLQEGFKDSSSFQELAERYRHAGDDFGMAHAMMIYAIRAVVLLETLSREPHILDESRPRPEVIGISGGLFSAAVMSISINFETLYAACIEAGRVWSRLCNLTLVRSRAMEESPGTWGWAILGIPASDLGKTLEQFQSSMGIPCSKIAKVGVIGDRWSTIIGPPSVLELTLSECPNLKNLPKDELNIHALQHTLSVSDSDIDYIVGNSPLLETPLPPGYRIHGLDDDFPEASYAEWRHLLRASAYQTLSRPLDIVQAVSNLNAALGASKDIEAKIIGPSSHTTYLAKCLQTAGKEVLIQNGFLASPQTSGTNDGIAIVGMAGKGPGSDDLEEFWNVILKGLDLHEEVPSDRFNLEEYYSPKHP…
Dothideomycetes	Alternaria_solani_na_GCA_002952155.1	SAT-KS-AT-PT-xCP-xCP-Te	MNVLIFGDQTADQYPLLRKACTWKNNSTLTTFLDRVSQVVREEVQKLPRTQRDQIPSFLTTWDLVEAYYAKGLKIPQLESCMVTIAQLAHYIGYYSENPSDLQNPANTRVVGLCTGLLAGSVVASARSLSELLPLATEAVRIAFRTGTVVGAAKDAVEQASAPKETWSTIVTNMTEKAAKDAIAAFHQEQRTPTLAQAYISAVSTMALTISGPPATTKRLLQGDAFKGCARVAIPVYAPYHAAHIYGQADIDQILDKDAIRHLQQFRPLSLVHSASSGKCHTATSTLDLIRAALTEMLVEPVRWDNLLTEVVSQITATSSQDCSVSAIGVTTITNSLVSALRNGGQSSVTARDHTTWVAAEHDSRGRTQNDKIAIVGMSGRFPGAATPDALWDLLEKGL…
Dothideomycetes	Alternaria_sp._Ai002NY15_Ai002NY15_GCA_023758125.1	SAT-KS-AT-DH-xCP-xCP-MT	MRTQSDHFAPSVAFFCPQSKAPTEAYLKQLQKYIVETPLLLPFAEAITSLTDTWTILCDGHPDIAKLKSGKRHVVSLKRWITDGISGPVSSSMSGILALPLLVVIQICQYFQLLELHGLTHERMLASLKKGGGAQGYCGGLPTAFAVSCAKDEEEVVHLATKALRLAFAVGTFGELGDDELVEGATTIAVRLRTPPQGDELVAGIPRCYISAITDPKTISIVGPVLELEKVAERARNRGLLVTDIHIRGKVHNPENAPLVKVLFDICQEHDDMMLPDASQLRVPVRSNLDGSLLHDCSLTHEAINTILASRCEWYRLLKDVAQDLAGSGTDAHTFALFGIGDPVPLMPFHNARLRISKMEVHTTVQGARLAEYKYPEDAIAITGVSCRLPRAADLEELW…
Dothideomycetes	Alternaria_sp._Ai002NY15_Ai002NY15_GCA_023758125.1	SAT-KS-AT-PT-xCP-xCP-Te	MNVLIFGDQTADQYPLLRKACTWKNNSTLTSFLDRVSQVVREEVQKLPRTQRDQIPNFLTTWDLIEAYYAKGLKVPQLESCMVTIAQLSHYIGYYAENPSDLKNPANTRVVGLCTGLLAGSVVASARSLSELLPLAIEAVRIAFRTGTVVGAAKEALEQTPVPKETWSTIVTSISEKAAKDAITAFHQEQRIPTLAQAYISAVSTMALTISGPPSTTKRLLQSDAFKGCTRVSIPVYAPYHAAHLYTEADIDQILDKDATRHLQQFRPLSLVHSASTGECHTATSTLDLIRTALSEILVESVRWDNLLSEVVSQVTATSSQDCSVSAIGVTSITNSLVSALKSGGQSSVTARDHTSWVAAEHDSRGRTQNDKIAIVGMSGRFPGAANPDALWDLLEKGL…
Dothideomycetes	Alternaria_sp._BMP_0032_BMP_0032_GCA_023758005.1	SAT-KS-AT-DH-xCP-xCP-MT	MRTQSDHFAPSVAFFCPQSKAPTEAYLKQLQKYIVETPLLLPFAEAITSLTDTWTILCDGHPDIAKLKSGKRHVVSLKRWITDGISGPVSSSMSGILALPLLVVIQICQYFQLLELHGLTHERMLASLKKGGGAQGYCGGLPTAFAVSCAKDEEEVVHLATKALRLAFAVGAFGELGDDELVEGATTIAVRLRTPPQGDELVAGIPRCYISAITDPKTISIVGPVLELEKVAERARNRGLLVTDIHIRGKVHNPENAPLVKVLFDICREHDDMMLPDASQLRVPVRSNLDGSLLHDCSLTHEAINTILASRCEWYRLLKDVAQDLAGSGTDAHTFALFGIGDPVPLMPFHNARLRISKMEVHTTVQGARLAEYKYPEDAIAITGVSCRLPRAADLEELW…
Dothideomycetes	Alternaria_sp._BMP_0032_BMP_0032_GCA_023758005.1	SAT-KS-AT-PT-xCP-xCP-Te	MNVLIFGDQTADQYPLLRKACTWKNNSTLTSFLDRVSQVVREEVQKLPRTQRDQIPNFLTTWDLIEAYYAKGLKVPQLESCMVTIAQLSHYIGYYAENPSDLKNPANTRVVGLCTGLLAGSVVASARSLSELLPLAIEAVRIAFRTGTVVGAAKEALEQTPVPKETWSTIVTSISEKAAKDAITAFHQEQRIPTLAQAYISAVSTMALTISGPPSTTKRLLQSDAFKGCTRVSIPVYAPYHAAHLYTEADIDQILDKDATRHLQQFRPLSLVHSASTGECHTATSTLDLIRTALSEILVESVRWDNLLSEVVSQVTATSSQDCSVSAIGVTSITNSLVSALKSGGQSSVTARDHTSWVAAEHDSRGRTQNDKIAIVGMSGRFPGAANPDALWDLLEKGL…
Dothideomycetes	Alternaria_tenuissima_ANJ_GCA_017589455.1	SAT-KS-AT-PT-xCP	MIRAKVLYFSGEIPQGDPEGDQQDLFRKLHLLSKERSYPILALFLETITRAVKEEQRRLIRTERDLIPAFESILDLTDHVVELRKTALGGAVERVLVLAFQLGSFIAYHEAHPLEYNFQSSDTFLIARGPGMLSAAAVALCPNVSMVPSIAGDIAKVAFRFGLVVDQVCRSLEISPDEINAAGAWIYCVYGIDPSEAQEAVALFNAEKKYAETSVASVFNDDGKSVSIGGPPSTLKTLFTECEFFKRTRNVPMKKVQGMWHTGKVYGTEHVQQVVPHIDEKHRLHLSLFSPVTGQPFEAANANELLEQIMEEMLTQRIRWDRTIQSVTERLKQVSPNSTQLIAIQPSQYVESLLAQWKADIPTATHTAKDMMSAIMNLPLGSSPAKDAKSSKIAVVGMA…
Dothideomycetes	Alternaria_tenuissima_ANJ_GCA_017589455.1	SAT-KS-AT-PT-xCP-xCP-Te	MNVLIFGDQTADQYPLLRKACTWKNNSTLTTFLDRVSQVVREEVQKLPRTQRDQIPNFLTTWDLIEAYYAKGLKIPQLESCMVTIAQLAHFIGYYAENPSDLQNPANTRVVGLCTGLLAGSVVASARSLSELLPLATEAVRIAFRTGTVVGAAKEAVEQASAPKETWSTIVTNMTEKAAKDAIAAFHEEQQTPTLAQAYISAVSTMALTISGPPATTKRLLQGDAFKGCARVAIPVYAPYHAAHFYSPADIDQILDKDAIRHLQQFRPLSLVHSATTGKCHTATSTLDLIRSALTEILVEPVRWDNLLTEVVSQVTATSSQDCSVSAIGVTTITNSLVSALRNGGQSSVTARDHTTWVAAEHDSRGRTQNDKIAIVGMSGRFPGAANPDALWDLLEKGL…
Dothideomycetes	Alternaria_tenuissima_FERA_1166_GCA_004156035.1	SAT-KS-AT-PT-xCP	MIRAKVLYFSGEIPQGDPEGDQQDLFRKLHLLSKERSHPILALFLETITRAVKEEQRQLIRTERDLIPAFESILDLTDHVIELRKTALGGAVERVLVLAFQLGSFIAYHEAHPLEYNFQSSDTFLIARGPGMLSAAAIALCPNVSMVPSIAGDIAKVAFRFGLVVDQVCRSLEISPDEINAAGAWIYCVYGVDPSEAQEAVALFNAEKEYAETSVASVFNDDGKSVSIGGPPSTLKTLFTECEFFKRTRNVPMKKVQGMWHTGKVYGMEHVQQVVPHIDEKHRLHLSLFSPVTGQPFEAANANELLEQIMEEMLTQRIRWDRTIQSVTERLKQVSPNSTQLIAIQPSQYVESLLAQWKADIPTATYTAKDMMSAIMNLPLGSSPAKDAKSSKIAVVGMA…
Dothideomycetes	Alternaria_tenuissima_FERA_1166_GCA_004156035.1	SAT-KS-AT-PT-xCP-xCP-Te	MNVLIFGDQTADQYPLLRKACTWKNNSTLTTFLDRVSQVVREEVQKLPRTQRDQIPNFLTTWDLIEAYYAKGLKIPQLESCMVTIAQLAHFIGYYAENPSDLQNPANTRVVGLCTGLLAGSVVASARSLSELLPLATEAVRIAFRTGTVVGAAKEAVEQASAPKETWSTIVTNMTEKAAKDAIAAFHEEQQTPTLAQAYISAVSTMALTISGPPATTKRLLQGDAFKGCARVAIPVYAPYHAAHFYSPADIDQILDKDAIRHLQQFRPLSLVHSATTGKCHTATSTLDLIRSALTEILVEPVRWDNLLTEVVSQVTATSSQDCSVSAIGVTTITNSLVSALRNGGQSSVTARDHTTWVAAEHDSRGRTQNDKIAIVGMSGRFPGAANPDALWDLLEKGL…
Dothideomycetes	Alternaria_triticina_DAOMC238612_GCA_040583995.1	SAT-KS-AT-DH-xCP-xCP-MT	MRTQSDHFAPSVAFFCPQSKAPTEAYLEQLQKYIVETPLLLPFAEAITSLTDTWTILCDGHPDIAKLKSGKRHVVSLKRWITDGISGPVSSSMSGILALPLLVVIQICQYFQLLELHGLTHERMLASLKKGGGAQGYCGGLPTAFAVSCAKDEEEVVHLATKALRLAFAVGTFGELGDDELVEGATTIAVRLRTPPQGDELVAGIPRCYISAITDPKTISIVGPVLELEKVAKRARNRGLLVTDIHIRGKVHNPENAPLVKVLFDICREHDDMMLPDASQLRVPVRSNLDGSLLHDCSLTHEAINTILASRCEWYRLLKDVAQDLAGSGTDAHTFALFGIGDPVPLMPFHNARLRISKMEVHTTVQGARLAEYKYPEDAIAITGVSCRLPRAADLEELW…
Dothideomycetes	Alternaria_triticina_DAOMC238612_GCA_040583995.1	SAT-KS-AT-PT-xCP-xCP-Te	MNVLIFGDQTADQYPLLRKACTWKNNSTLTSFLDRVSQVVREEVQKLPRTQRDQIPNFLTTWDLIEAYYAKGLKVPQLESCMVTIAQLSHYIGYYAENPSDLKNPANTRVVGLCTGLLAGSVVASARSLSELLPLAIEAVRVAFRTGTVVGAAKEALEQTPVPKETWSTIVTSISEKAATDAITAFHQEQRIPTLAQAYISAVSTMALTISGPPSTTKRLLQSDAFKGCTRVSIPVYAPYHAAHLYTEADIDQILDKDATRHLQQFRPLSLVHSASTGECHTATSTLDLIRTALSEILVESVRWDNLLSEVVSQVTATSSQDCSVSAIGVTSITNSLVSALKSGGQSSVTARDHTSWVAAEHDSRGRTQNDKIAIVGMSGRFPGAANPDALWDLLEKGL…
Dothideomycetes	Alternaria_ventricosa_BMP_2768_GCA_023758065.1	SAT-KS-AT-DH-xCP-xCP-MT	MRTQSDHFAPSVAFFCPQSKAPTEAYLEQLQKYIVETPLLLPFAEAITSLTDTWTILCDGHPDIAKLKSGKRHVVSLKRWITDGISGPVSSSMSGILALPLLVVIQICQYFQLLELHGLTHERMLASLKKGGGAQGYCGGLPTAFAVSCAKDEEEVVHLATKALRLAFAVGAFGELGDDELVEGATTIAVRLRTPRQGDELVAGIPRCYISAITDPKTISIVGPVLELEKVAERARNRGLLVTDIHIRGKVHNPENAPLVKVLFDICQEHDDMMLPDASQLRVPVRSNLDGSLLHDCSLTHEAINTILASRCEWYRLLKDVAQDLAGSGTDAHTFALFGIGDPVPLMPFHNARLRISKMEVHTTVQGARLAEYKYPEDAIAITGVSCRLPRAADLEELW…
Dothideomycetes	Alternaria_ventricosa_BMP_2768_GCA_023758065.1	SAT-KS-AT-PT-xCP-xCP-Te	MNVLIFGDQTADQYPLLRKACTWKNNSTLTSFLDRVSQVVREEVQKLPRTQRDQIPNFLTTWDLIEAYYAKGLKVPQLESCMVTIAQLSHYIGYYAENPSDLKNPANTRVVGLCTGLLAGSVVASARSLSELLPLAIEAVRVAFRTGTVVGAAKEALEQTPVPKETWSTIVTSISEKAATDAITAFHQEQRIPTLAQAYISAVSTMALTISGPPSTTKRLLQSDAFKGCTRVSIPVYAPYHAAHLYTEADIDQILDKDATRHLQQFRPLSLVHSASTGECHTATSTLDLIRTALSEILVESVRWDNLLSEVVSQVTASSSQDCSVSAIGVTSITNSLVSALKSGGQSSVTARDHTSWVAAEHDSRGRTQNDKIAIVGMSGRFPGAANPDALWDLLEKGL…
Dothideomycetes	Alternaria_viburni_BMP_2772_GCA_023758015.1	SAT-KS-AT-DH-xCP-xCP-MT	MRSQSDHFAPSVAFFCPQSKAPTEAYLEQLQKYIVETPLLLPFAEAITSLTDTWTILCDGHPDIAKLKSGKRHVVSLKRWITDGISGPVSSSMSGILALPLLVVIQICQYFQLLELHGLTHERMLASLKKGGGAQGYCGGLPTAFAVSCAKDEEEVVHLATKALRLAFAVGTFGELGDDELVEGATTIAVRLRTPPQGDELVAGIPRCYISAITDPKTISIVGPVLELEKVAERARNRGLLVTDIHIRGKVHNPENAPLVKVLFDICQEHDDMMLPDASQLRVPVRSNLDGSLLHDCSLTHEAINTILASRCEWYRLLKGVAQDLAGSGTDAHTFALFGIGDPVPLMPFHNARLRISKMEVHTTVQGARLAEYKYPEDAIAITGVSCRLPRAADLEELW…
Dothideomycetes	Alternaria_viburni_BMP_2772_GCA_023758015.1	SAT-KS-AT-PT-xCP-xCP-Te	MNVLIFGDQTADQYPLLRKACTWKNNSTLTSFLDRVSQVVREEVQKLPRTQRDQIPNFLTTWDLIEAYYAKGLKVPQLESCMVTIAQLSHYIGYYAENPSDLKNPANTRVVGLCTGLLAGSVVASARSLSELLPLAIEAVRIAFRTGTVVGAAKEALEQTPVPKETWSTIVTSISEKAAKDAITAFHQEQRIPTLAQAYISAVSTMALTISGPPSTTKRLLQSDAFKGCTRVSIPVYAPYHAAHLYTEADIDQILDKDATRHLQQFRPLSLVHSASTGECHTATSTLDLIRTALSEILVESVRWDNLLSEVVSQVTATSSQDCSVSAIGVTSITNSLVSALKSGGQSSVTARDHTSWVAAEHDSRGRTQNDKIAIVGMSGRFPGAANPDALWDLLEKGL…
Agaricomycetes	Amauroderma_rugosum_ACCC_51706_GCA_017499575.1	SAT-KS-AT-PT-xCP-xCP-xCP	MSPAVTILDVPVFAGQGTTAANSPQTRQQALKDAASPAGSLLLSSCFETFHNELSTLTTEELALVDTTLSEFANKNALLEVPSDKYLNNSLITGPTLFLIQSLRYLAFVEASGLENDSLTPFSDVLKGNLEHGLGVFGFSSGILPAVVVGSALSTITYISRAVEAYRLALWIGVRTQIYRAKHAANDPSSPWSLVFLGISKETTEEAILEFAKDNEGASLFVTAVMDDKCVTVSGHPDTLAAFASSLTTGAVVHRTSVDTLYHSPEHIKGVRQEVLDDVVRRSIKFPDYSDIIVPVRSTFTGGALDKKVTDGTLVDAVLDMVLTQPVNWDLVVDGLVKSAPVGIPIRLLNVGPGTGLTRSMERSFSKDVVSSLDLTSVHNEAAGEAKSKQEPIAIVGMA…
Sordariomycetes	Ambrosiella_beaveri_CBS_121753_GCA_030294605.1	SAT-KS-AT-PT-xCP-xCP-Te	MMTQSKLCFNFFGDQSLDTYQSLADFCRNGEPGIVAKTFMERAGAALRDEIEKLPRLERSRIPVFRSLYQLNENYRAQTLRHPGIDSALLCIFQIAQYIDRAEKAPEDHALNSHTINVGLCTGQFAAAAVSLAKNPSHLVPVGVQTILLAFRLGSHVASLANKLAPVEIGEKSEPWTCIVANVNGEQAKEALAKFHAERSIPNANKAYVSAISAANVAISGQPSTLSKIRSSGVFSTKLIPIPVYGPYHAEHLHGKIDMDSILKLDSADAKKVFEGLEPRSGIVSSSSGELIKKGNVDDLFRSIALECLCEPLMFNKAVESCVGLASAFEKSSECLIVPYGPISISNTLARVIESKTGLIVKLRTSEIKRDTHQAHLGAHGNQLGRGKLAIVGMAGRFP…
Sordariomycetes	Ambrosiella_xylebori_CBS_110.61_GCA_002778035.1	SAT-KS-AT-PT-xCP-xCP-Te	MMTQSKLCFNFFGDQSLDTYQFLADFCRNGEPGIVAKTFMERAGAALRDEIEKLPRLERSRIPIFRSLYQLNENYRAQTLRHPGIDSALLCITQIAQYINRAEKAPEDHALNSHTINVGLCTGQFAAAAVSLAKNSSHLVPVGVQTVLLVFRLGSHVASLANKLAPVEIGEKSEPWTCIVANVNGEQAKEALAKFHAEYFIPNASKAYVSAISAANVAISGQPSTLAKIQSSGVFLTKLISIPVYGPYHAEHLHGKTDMDSILKLDSADAKKVFEGLEPRFSIVSPSSGELIKESNADDLFRSIASGCLCEPLMFSKVVESCVDLVSAFEKSSECLIVPYGPTSVSNTLARVIESKTGLIVKLRTSEIKRDSYQAHIGAHGNQLGRGKLAIVGMAGRFP…
Sordariomycetes	Amesia_nigricolor_F5_GCA_004802645.1	SAT-KS-AT-PT-xCP-xCP-Te	MAAHLDNNEVGKKLVCLLFGDQSLDTHGFLTRFFRQENHGVLAKAFLGQATHALLAAIGELPLDQRKIFPPFRNLQQLNERYAIQKVKHAGIDAALLCVSQLAHYLDHIEKNFADVTPLDDTILVGLCSGLWAAAAIATAPSLPDIVPTGVQAVLFALKLGSYVHAIGQRMSPTHERSESWTYLYSGLSQEDTEEKLASFHRDEGTPALNRAYVSAVSSATITVSGPPRTLKALNGSGILSSTYPPSSLPVHGPYHAHHLHSTADVEKILGLNDQKVQDALYNSRPRFPVMSCGTAQWFQASDTKSLMASIASTVLNETLVFNKVLDTCVEHARQFEGKQCLVLPLGPTMNATTLSNLLKKETSLEVTLRQTFASSSSGTTTPRIGNQGSVQRPKLAIV…
Sordariomycetes	Amesia_nigricolor_F5_GCA_004802645.1	SAT-KS-AT-PT-xCP-xCP-Te	MTEPPQLFVFGDQAVPYAAELRRFIAKREDYTLSNLLSQAYHELRAEIARLPYSQRTHFPASSTLVELLNAHGSSARPNCALDSALACLHQIASFVSYFNETAKEYPKPSSTCLVGSCIGLLSAFAVSCGETILDLVDLGPEMVLLAFRLGLAVQKKTASVMSGLDSVTSVSFVVAGIDRDTASNLINDFCRSRSLSPVACVYISAIGNSNVTVSGPPVWLDDFFSQNPRLKSAKIAMSGLFHSAILYDPSTVVALVETVGAKLRHRAGRLNIVSNSEGDPTILPGPAEQALHTILSDILLRQMRWDLVAQRAAELSRRSDPSVAAIFPFAAGSVQGIAAAIRESRGGDSATIIDTARQSRSVDTGGRSGADADAPGGRRDRSKIAIIGYSGRFPEAEN…
Dothideomycetes	Ampelomyces_quisqualis_BRIP_72107_GCA_018398575.1	A-xCP-KS-AT-KR-xCP-Red	MSESTAPEYHQAAPELFNDTDDALTLGHCLHQLLQNVTEKYTDKTALICANEELSYGEVNGLANRFAHVLGQHGIKRGDRIGIALDRSIDLVVMLIAVLKSGATYIPIDATFPEERIHQMLCDAEPKIVIIGPSTRNALSFWKGVCLDSSTIPRGELDLKSEKSNPEVEVFPHDLAYIIYTSGSTGTPKGVEIQHGALCNFLLGAQKEPGCEEKDRLLAISTVSFDIAMLEIFLPLISGATLVVAQTNEIKDPNRLMHHLEHYEITTMQATPVTWQMLLDSGWKGASYLSKIFSAGDALPRGLADRLIPCADSVWNLYGPTEATIYSSYWRVCFDSRMLIGKPFNNYRLYVLDENLEAVPLNSEGELYIGGAGLARGYLNKPEITGTRFLPNPFHKGLM…
Dothideomycetes	Ampelomyces_quisqualis_BRIP_72107_GCA_018398575.1	SAT-KS-AT-PT-xCP	MPSSSSWDSMEDAKSSLLFFNNDLPSDDINHLYRVLHRRTAQLSCPQLSHFITLCNQVIKEEIAKLPKKWQENVPDFVNVLSLVNDNAFRKGPLGGAMEGVFLNIFQIGMILGHHEVEQVPYQFNPKTTTLFGLGTGLLSAAAASVSLNIADLAVAGAHIVRASFRLGIHVYNFSEQLEAPDVDGNPWAFVIPGVAAEVVQAELDQYNRDTANPTLSHIFISASDKASVSVSGPPSRLRHCLKSCDVLRYYNFMPLPVHHGLCHAPHIYSAADVQAIIEDILHDDHTRIAGLKTSLPLLSSSTGRPYPAKDFRSLIDQVLAELLMNKIHIDNVVDGIIEVLDLSSAIQKEGNLFAFRNSVVLRTMMKNVEKQCDGRITFTHQDLVEWTKREDSDAESPI…
Dothideomycetes	Ampelomyces_quisqualis_BRIP_72107_GCA_018398575.1	SAT-KS-AT-PT-xCP-xCP-Te	MPFTAPVTQAESHEIQRQILLFGDLSLVQFEESFRRILHVKTNALLTSFIDRVNYSLRRLLETLPLEQQIFFPRFTTLIDLVSKLGETEGTPVLRFFLLSVHEVAQFLVHYGSGSKPFPSPANTYVLGPCTGGFAAAAISCSKGLPDVVPHGVAACMTAFKTALCSYLVGRSQSRVQATESKSWSVLLNPQKDIEVEDLLKDYMPNQAALRNLPIWVSAVGKSTTLSGRPAVLQDFITKNASRVKSSRYLDVESPYHAAHLFNDDDVEEIVGDLVQADNRVVNFPFIASSTGKVISTGSLVDLLRTVVQEALEEPVRWDLVLASCRDQFSSAKECIIFPFSSHAASMVSSTLDKDGVQVAVEEITAPVTGEVPTEPTGKFEHSKIAIIGYSGRFPNSAS…
Dothideomycetes	Ampelomyces_quisqualis_BRIP_72107_GCA_018398575.1	SAT-KS-AT-PT-xCP-xCP-Te	MNILIFGDQTADQYPLLRKACTWKNNAALTTFLDRISVVIRDEVQKLPRAQRDQIPDFLTTWDLVEAYYSKGLKVPQLESCMITIAQLAHYIGYYAENPSELPNSADTRIIGLCTGLLAASVVASARSLSELLPLATEAVRIAFRAGSCVSVARAALENVTIAKDSWSTIVTGISEKDAKSALALFHDDRLIPTSARAYISAVSVMALTISGPPSTTRLLFQEIEPFRHIARVPIPVFAPYHAPHIYNQADIDRILDKDAARHLQQFRPLSLVHSATLGKCQTATNTLDLVQAALGEILFEPVRWDKLLEEVVCQVTATSSAKCSVSAIGVTNVANSLASALKSGGQIDVSVRDQSLWCATTDESRGRTQNDKIAIVGISGRFPGAASPEKLWELLEKG…
Dothideomycetes	Ampelomyces_quisqualis_HMLAC05119_GCA_010094095.1	Atg_2-KS-AT-DH-MT-ER-KR-xCP	MESQSSSGALKRQIEAQRLQLLSTSTKSIPAFYRNVEEALDSRRATHSLFSILQNNWQTSLAIDFCSNDYLSWNTTGLIRKAFLDELGANPGFSVAAGGSRVMEGNYAYIEETEQEIATWHGAQAGLIVNSAFDANVMVWSALPRPGDVIVYDNLVHASTHEGMERSLAIQKTAFEHNDVKAFRMTLSTILESSPMIKQGRRSILVAVESVYSMEGDVCPLLELVEIAEELSGGLGNIQFVVDETHSAGLFGPDGAGLVCELGLEDEVAVRLHTYSKAMGACGGIILGNATIKAALINFARPSIYSASPSFPFVAAIRAGHNMLGKIQQLARTFFESLTSHPLWEQARDRGILDVPLASNWEERPFLTHIVPVWTRQNYLYWLLFHCLAASFFVLPVKH…
Dothideomycetes	Ampelomyces_quisqualis_HMLAC05119_GCA_010094095.1	A-xCP-KS-AT-KR-xCP-Red	MSESTTPEYHQAAPELFNDTDDALTLGHCLHRLLQNVTEKYTNKTALICANEELSYGEVNGLANRFAHVLGEHGVKRGDRIGIALDRSIDLVVMLIAVLKSGATYIPIDATFPEERIHQMLCDAEPKIVIIGPGTRNALSFWKGVCLDSSTIPRGELDFQSEKSNPEVEVFPDDLAYIIYTSGSTGTPKGVEIKHGALCNSLLGAQKEPGCEEKDRLLAISTISFDIAMLEIFLPLISGATLVFAQTNEIKDPNRLMHHLEHYKITTMQATPVTWQMLLDSGWKGASYLSKIFSTGDALPRRLADRLIPCADSVWNLYGPTEATMYSSYWRVCFDSCMLIGKPFNNYRLYVLDENLEAVPMNSEGELYIGGAGLARGYLNKPEITRTRFLPNPFHEGLM…
Dothideomycetes	Ampelomyces_quisqualis_HMLAC05119_GCA_010094095.1	SAT-KS-AT-PT-xCP	MPSSSSWDSMEDAKSSLLFFNNDLPSDDINHLYRVLHRRTAQLSCPQLAHFITLCNQVIKEEVAKLPKKWQENVPDFVNVLSLVNDNAFRKGPLGGAMEGVFLNVLQIGMILGHHEVEQVPYQFNPKTTTLFGLGTGLLSAAAASVSLNIADLAVAGAHIVRASFRLGIHVYNISEQLEAPDADGNPWAFVIPGAAAEVVQAELDRYNRDTANPTLSHIFISASDKASVSVSGPPSRLRHCLKSCDVLRYYNFMPLPVHHGLCHAPHIYSAVDVQVIIEDILDDDHTRIAGLKTSLPLLSSSTGRPYPAKDFRSLIDQVLAELLMNKIHIDNVVDGIIEVLNLSSASQQERNLFAFRNSVVLRTMMKNVEKQCDGRITFTHRDLVEWTKREESDAETPI…
Dothideomycetes	Ampelomyces_quisqualis_HMLAC05119_GCA_010094095.1	SAT-KS-AT-PT-xCP-xCP-Te	MNVLIFGDQTGDQYPLLRKACTWKNNAALTTFLDRISVVIRDEVQRLPRAQRDQIPDFLTTWDLVEAYYSKGLKVPQLESCMITIAQLAHYIGYYAENPSELPNSADTRIVGLCTGLLAASVVASARSLSELLPLATEAVRIAFRAGSCVSVARAALENVTIAKDSWSTIVTGISEKDAKSALALFHDDRLIPTSARAYISAVSVMALTISGPPSTTELLFQEIEPFKHIARVPIPVFAPYHAPHIYSQADIDRILDKDAARHLQQFRPLSLVHSATLGKCQTATNTLDLVQAALGEILLEPVRWDKLLEEVVSQVTATSSAKCSVSAIGVTNVANSLASALKSGGQTNVSVRDQSLWCATTDESRGRTQNDKIAIVGMSGRFPGAASPEKLWELLEKG…
Dothideomycetes	Ampelomyces_quisqualis_HMLAC05119_GCA_010094095.1	SAT-KS-AT-PT-xCP-xCP-Te	MPSTTPVTQAESHEFQRQILLFGDLSLVQFEESFRRILHVKTNALLTSFIDRVNYSLRRLLETLPLEQQIFFPRFTTLIDLVSKLGETEGTPVLRFFLLSVHEVAQFLVHYGSGSKPFPSPANTYVLGPCTGGFAAAAISCSKGLPDVVPHGVAACMTAFKTALCSYLVGRSQSRVQATESKSWSVLLNPQKDIKVEDLLKDYMPNQAALRNLPIWVSAVGKSTTLSGRPAVLQDFITKNASRVKSSRYLDIESPYHAAHLFNDDDVEEIVGDLVQADNRVVNFPFIASSTGKVISTGSLVDLLRTVVQEALEEPVRWDLVLASCHNLFSSSKECTILPFSSHAASMVSSTLDKDGVQVTVEEITAPVTGEVPTEPTGKFEHSKIAIIGYSGRFPNSAS…
Sordariomycetes	Amphirosellinia_nigrospora_JS_1675_GCA_004123355.1	SAT-KS-AT-DH-xCP-MT	MTEAHLAESNYVLFGPVVTSWTSEGLQELQAALQENTSFAFLRHALTDLPSLLPILQSDEVSPFVSRLEHLQELSDFASGQSILDSTTLSNVHLAPLTVIYQAVEFIRVANLPEFHDDKSTQALSSLPKLQGVQGFCLGFLSAAAASSSRSWEALEQNFATSIRLSACIGAIIEADLQSHTDGLKSLSIRWKTDRARMQADTCLDLFSDTFISCITDEKSVTVTIPGENVAEYIEQLSQIGVTAKEIGLNGAYHSKRHAKAVEALIRVAEDKDNLQYKDSLVYPLRSNANAQLIGTEPLHEVALRTILCNRAHWYQVVKSAVDSLRGTTVRPLPIGKGSFVPRAITTRKNGSLSPETEASQTTETDDRWTDEIAIVGMSCRYPSADSPSDFWDLLCDRV…
Sordariomycetes	Amphirosellinia_nigrospora_JS_1675_GCA_004123355.1	SAT-KS-AT-DH-xCP-Te	MATTTRRHVLLFGDQTDDVTSCISDLYIASKQSALLAKFLRDASDLCQIEFGNLQPCFRNETPPFESLLEMVDNHAKTDRSPVLASCVLSYFARLGSSSYFNVLQSLLNRFHEEHGILKHRSTWIGVVGRGWVTISGPPSTLQLLMSRLESCDELDGGLSFVPLPVASAVHAPHIPGFDFDSTAKTSYIWDLPLQEGACIMSTDECIPYNARTLGEVTRRIIPAIISAPLMVEKTFKATAEHLKQVCTNVDISIIGPSAQAASLVRTLNHAGIGVDVRTFPDYKPCLQTRSGSGAVAIVGMSARFPQANDLEQFWKLLMEGRTTHERVTEHPNSMMNTDGCFLSNPGAFDARLFNMSPREAMQVDPTHRLLLMTSLEALEKAGYNPNSGPSSRSKRTAV…
Sordariomycetes	Amphirosellinia_nigrospora_JS_1675_GCA_004123355.1	SAT-KS-AT-PT-xCP	MTQAKVIYFSGEIPQGDPEGDQRDLFRKLYSLSKEKSHTVLASFLHSVTYSLKEECHQLSKPLKDSIPAFESVLDLTDHVVELRKTPLGPAVERVLVFVFQLGSFIAHHEVHPLEYDFRPSNTSLIARGPGMLSAVAIGLSPSFVMLPAISGDITKVAFRFGLVVNQVCISLETSPNEINFDGAWVYCVYAVDVNDARRAVSEFNTEKALPIPSMASVFSSDGKSVSIGGQPSTLSALFSESEFFKNTTNVPMKKVQGMWHSGNAYGIEHVKQIVPRFRHKHGLQLPLFSPTTGKLYEIMDPTSLLEKVMEEMLTEQIRWDKTIDGVTRLLSHISPASIKMIAIQPSQYIESLLDYWRAEFPSAVVSSQDMMSAAMSIPLEGSSPRDPKSSKIAVVGMA…
Sordariomycetes	Annulohypoxylon_maeteangense_CBS_123835_GCA_022496945.1	SAT-KS-AT-PT-xCP-xCP-Te	MADQMAFLLFGDQSLDTHGFLADFYRRGNPGVLSKEFLRLAGDALKDEVERLPQEERRNIPTFRKLQQLNEKYHAQPVKFPGIDSALLCIAQLAHYIDRSEKEHGDVTDKSNTKLSGLCTGLFAATAIASSPSLSTLLPVAVQTVLMAFRTGCHVASLAERLSPSTGKSESWTYVLPAAQEAEAKSLLAEFHKEEALFSKDLFESRPTAIPVYGPYHAPHLHGLVDIRKMLRLDDEAVTTALAGSKPQSAVMSCVTGLPFPETDTKSLLAAVVHEILNEALIFHKTLSGNANEARDFKGSRILVIPYGPTQAASTLANVLRSQTKAEVILRPTPQVSRETTSASIGNHGSSGNCKLAIVGMAGRFPDSASHDALWDLLLKGIDAHRIVPADRFPVETHY…
Sordariomycetes	Annulohypoxylon_maeteangense_CBS_123835_GCA_022496945.1	SAT-KS-AT-xCP-MT-Red	MVDMGGRPSGPLSGPTVLLFGPLALSFDEAAFAQVRKNVVENEDSHWVIDTVAEFPQIWKSLTTAIPSLKTASGLKQLEDLSDAFRTGRPLETSFPLPNKLLIPLVIVSHLSQYATFLRNSTEGEHIDPFTTSKIDRETLGLCTGLLSAFAVSSSGNSEQFKKYAAVAVRLALLIGTVVDAQDEATEPSKSLSAAWNSAGSGEELKSIVKSFPDTYVSVNYDDNRATITTKASTISKLLLQLRGAGLIASEVGLYGRFHASINLEKLALLLEFVNAHAEFQFPNASSGLAVPTRSNRGGDLITHGPLHQHALQSILAEPPQWFQTVSVVRDTTLKSKDSCILSFGPERAVPPSLLRGLNPQVIHVADLDNTSSRFESFSQKDLRTFSDNDVAVVGMSIK…
Sordariomycetes	Annulohypoxylon_nitens_CBS_120705_GCA_022496965.1	SAT-KS-AT-DH-xCP-MT	MTKFGASASSHTQEFVVALFGPQVTYWTRDTLSSLQSDLLRNPNFQFLTKSLLELPSLWSLLEQDFASENFHGADSLKSLHDFATGEKLLDPQTLTNTHLAPLTVVSHVVDFIRSVDNPYTKESLLSFEAAQGFCIGFLSAAALASASDWSAFEQNASNAIRLAACIGVVVDKEEASHAAQDRATAISVYWKTAADRTFLETCLDNIPQAYISCITDDRSFTVTLPKGDEEAFCARLREAKIPTSLVGLNGSYHHSRHIETADKLVKLCSKNSNLRLPDAESLRLPLRSTADGSVIKTGAIHEIAIQLILCKRAHWFQTVKSTLGDLTPNKATFVSLGTKSCIPRSLSPGKQTHDDEGALEEIAVVGMACRFPQADTLEEFWEIISAGKTALSTMPLDR…
Sordariomycetes	Annulohypoxylon_nitens_CBS_120705_GCA_022496965.1	SAT-KS-AT-DH-xCP-xCP-Te	MYRVAVFAGLGSETLFSRTTLDTAVQDASLPESQIILRACHAAFRKQIAKAIEQGHLSLESVDLDDFTEPESLIQPPLTYHHNVVIQHTAIYLIQILRFLRHSRGTHDVQGVAGFCAGLLPAAVVATSHNVIEFMQRAQDFFHVTLWLGINSESYRQAVLSQGGCSPDLPWSMVVHNISDEIITRLISDDQAPIYVSARNSPGCVTLSGEGHQLAQFIEKLPSQCRTRPTNVLSLYHNRHRLREIFNQTVKTLERQLSSQWEVPVAPAAPLFSTITGEPLSFSVQSETSITLGRLVSLLLEMILLEPVDWASVQDKILSDVQQRVDSEECEILNFGPGYGVSKSIQKLPQTAEIRDVSAAGASASDSSASGISMDDIAIVGMAVDLPGASDADELWDNL…
Sordariomycetes	Annulohypoxylon_nitens_CBS_120705_GCA_022496965.1	SAT-KS-AT-PT-xCP-xCP-Te	MADQMAFLLFGDQSLDTHGFLADFYRRGNPSVLSKEFLRLAGDALRDEIDRLPREERRKIPIFRTLQQLNERYHAQQIKFPGIDSALLCIAQLAHYIDRSEKEHGDVTSKQNTKLSGLCTGLFAATAIASSPSLSTLLPIAVQTVLMAFRTGSHVASLAERLSPSTDKSESWTYVLPAAQEAEAKSILAEFHKEEGISQAAHAYVSAVSANNIAISGPPATLRSLFSKDLFESRPTAIPVQMLRLDDEAVATALAGSKPESVVMSCTTGLPFPQTDTKSLLTAVVHEILNEALIFHKTLSGNANEARGFQGSRILVIPYGPTQAASTLANVLRSQTQAEVILRPAPQVSRETTATSIGNHGSTGNCKLAIVGMAGRFPDSASHEALWELLEKGIDAHRV…
Sordariomycetes	Annulohypoxylon_nitens_CBS_120705_GCA_022496965.1	SAT-KS-AT-xCP-MT	MGSPGNEPHTQGPVILFFGPEIPSFSNQSLLELRLALRNREWATEALSTLHPTWDLISTKIPFLDKIPGKRQLGDLETWLREEPPEKPVGDLPNVVLAPLTVFTQLVQFQQYSERENSTERGTHTAPPRLIPLGFCMGLLSAFTVAHCKDAASWNYYAAVAIRLAMIIGAAVDATDVSSHLGTFESMAVSWQDSEQERKLESIVDGSRGCAYISVRSDERRSTVAVSKYYAPKMLEELRKAGISAVSTGLRGQFHSDYHGELRDDILRLCDSKPSWFQFMDERACVEADHISQPQNLHRIVIEAILLKECNWYGTVLALVNSHTMNGGRLTSVSFGQGRFIPPSLQSKFDNRFEQLMPQGESPPPQSTANLPASNDEELPSTNNVSHPYDSHITEEKDV…
Sordariomycetes	Annulohypoxylon_nitens_CBS_120705_GCA_022496965.1	SAT-KS-AT-xCP-MT-Red	MTKTFQQNLGTVPTVLLFGSLALSFDATTFHQLRKSITRTKSLTWLLKVLSNLADDCEVIFAAIPTLNQEDIHDQLLNVRDALTTGRSLRIVGHIPNTILIPLVVATQLAQYVALLEHCSLTHEQYIAKGDKETLGLCTGLLAGFAVAGSHDQTDLEKYGAAAVRLGMLAGLVVDLKNVINPSKSLSVGWSSPETRDAMIQALKDVPEAYISVEYDDNRATITAAASAASQLQSKLRLLGLAASEIGLYGRFHSTENNEILEQVLAHCDKHAEFQLPDASSSAIPTRSGYVDRKCVTQGTLHAHALLAILVESPTWYLTLDAALAEKEDTTILLSFGFERCVPSSVLRKLGTRLIHLEDSTVKGATFKREQEEQGCSERPWKDSDIAVVGMACKLPGAN…
Sordariomycetes	Annulohypoxylon_nitens_CBS_120705_GCA_022496965.1	SAT-KS-AT-xCP-MT-Red	MASTLLHHEKESRAVLIFGSQPLDFTHETASELRAAVLKNPALEWVPEVLAELQHRWDIVTNDMPELRAFPGGELLCDLDDWLRTGSFPRGLAAFPLPNILLTPLIVITHLLQYLNFKSSGNMEHDRNCEILGLCSGLLSAVAVSSAADDLQLRKFGTVAIRLAMIIGAIVDAQNCDTDGQPIWASFSAAWASADLDNALSAVLPEFPDAYISVISDERRVTVTCRKCDVAGLQQRLNALGLTTTRLGLRGSFHSPQHAASAEALIRLCDEPQALLRFPDAAELVQTMRDDSGGYIKTGSLHRKVIRSILTEQANWKRAFAALNTPSCAASFGLERCVPTWLSRKLGTRLIHVTSLDTADGEKRLCSGICNSQHGLSDNDDAVAVVGMSCLLPGAPDLE…
Sordariomycetes	Annulohypoxylon_sp._FPYF3050.1_FPYF3050.1_GCA_040938065.1	SAT-KS-AT-DH-xCP-MT	MTKFGASASSHTQEFVVALFGPQVTHWTHDTLSSLQSDLLRNSKLQFLAKSLLELPPLWSLLEQDFASEDFHGADSLKSLHDFATGEKLLDPQTLTNTHLAPLTVVSHVVDFIRSVDNPYTKESLLSFEAAQGFCIGFLSAAALASASDWSDFEQNVSNAIRLAACIGVVVDKEEASHAAQDRATAISVYWKTAADRTYLETCLDNIPQAYISCITDDRSFTVTLPKGDEEAFCARLREAKIPTSLVGLNGSYHHSRHIEAADKLVKLCSKNSNLRLPDAESLRLPLRSTADGSVIKTGDLHEIAIQLILCKRAHWFQTVKSTLGDLTPDKATFVSLSTKSCIPRSISAAKQTHDDEGALEEIAVVGMACRFPQADTLEEFWEIISAGKTALSTMPLDR…
Sordariomycetes	Annulohypoxylon_sp._FPYF3050.1_FPYF3050.1_GCA_040938065.1	SAT-KS-AT-DH-xCP-MT	MHTTTPKSAENTLLLFGPQLVRLVPSRLVDLRRTVLEDPNLEFLAEIIKDLPSVWTNTIQPSVPRLKSLENAKEKLQQIVTFFDNETEEAPRLAPPYNLLLAPLSVIAQITEYVHHGHQGTAQGFCIGFLSAAAVASARNRTELERLTATAVRLAVAIGGIVDFDEQERSDGQTTLGQSSTWSVRWTSALEREHFEKTLASFPEAYVSCVTDVDRVTITIPESHFVGFSKKLADGGLSAQPIGLCGRYHTTQPERAELVQQVKVLCQQNPDFRFPAVEQLVLPLRSTSDTEVITSGLLHEIALNCILVDVCKWYDTVQATLDVVEGQPVNVIPIGNSSGAIPRSLKSTAAVADEFLGPSSQTSTPPYTTLPNSNLTTGQTTPYSTAPLPVTGTTQPIAV…
Sordariomycetes	Annulohypoxylon_sp._FPYF3050.1_FPYF3050.1_GCA_040938065.1	SAT-KS-AT-PT-xCP-xCP-Te	MADQMAFLLFGDQSLDTHGFLADFYRRGNPSVLSKEFLRLAGDALRDEIDRLPREERRKIPIFRTLQQLNERYHAQQIKFPGIDSALLCIAQLAHYIEYEPIRRSEKEHGDATSKQNTKLSGLCTGLFAATAIASSPSLSTLLPIAVQTVLMAFRTGSHVASLAERLSPSTDKSESWTYVLPAAQEAEAKSILAEFHKEEGISQAAHAYVSAVSANNIAISGPPATLRSLFSKDLFESRPTAIPVQMLRLDDEAVTTALAGSKPESVVMSCTTGLPFPQTDTKSLLTAVVHEILNEALIFHKTLSGNANEARGFQGSRILVIPYGPTQAASTLANVLRSQTQAEVILRPAPQVSRETTATSIGNHGSSGNCKLAIVGMAGRFPNSASHEALWELLEKGI…
Sordariomycetes	Annulohypoxylon_sp._FPYF3050.1_FPYF3050.1_GCA_040938065.1	SAT-KS-AT-xCP-MT	MGSPGNESHTQGPVILFFGPEIPSFSNQSLLELKLALRNREWATEALSALLPTWDLISTKIPFLNNIPGKRQLGDLETWLREGPPENPVGDLPNVVLAPLTVFTQLAQFQQYSERENSTERGPHQAPPRLIPLGFCMGLLSAFTIAHCKDAASWNYYAAVAIRLAMIIGAAVDATDVSSHLGAFESMAVSWQDSEQERKLESIVDGSRGCAYISVRSDERRSTVAVSKYYAPKMLEELRKAGISTMSTGLRGQFHSDYHGELRDDILRLCDSKPSWFQFMDEHTCVEADHISQPQNLHRIVIEAILFKECNWYGTVLALVSSHTKNGGRLTSVSFGQGRFIPPSLQSKFDNRFEQLMPQGESPPSQSTANLSASGGDELSSTQNIFYPRDSYNTGKKDV…
Sordariomycetes	Annulohypoxylon_sp._FPYF3050.1_FPYF3050.1_GCA_040938065.1	SAT-KS-AT-xCP-MT-Red	MTQTFQQNLGTVPTVLLFGSLALSFDATTFHQLRKSITRTKSLTWLLNVLSNLADDCEVVFAAVPTLNQAGIHDQLLDVRDGLTTGRSLRIVGHIPNTVLIPLVVATQLAQYVALLEHCSLTHEQYIAKGDKETLGLCTGLLAGFAVASSHDQTDLEKYGAAAVRLGMLAGLAIDLKNVINPSKSLSVGWSSPETRDAMIQALKDVPEAYISVEYDDNRATITAAASAASRLKSKLRSLGLAASEIGLYGRFHSAENNQILEQVLAHCDKHAEFQLPDASSSAIPTRSGYVDGKCVTQGTLHAHALLAILVDSPTWYKTLDAALADKEDTTTLLSFGFERCVPSSVLRKLGTRLIHLEDSTVKGATFKRDQEEQGCSERPWKDSDIAVVGMACKLPGAN…
Sordariomycetes	Annulohypoxylon_sp._FPYF3050.1_FPYF3050.1_GCA_040938065.1	SAT-KS-AT-xCP-xCP-Te	MHRVAVFAGLGSETLFSRTTLDTAVQDASLPESQIILRACHAAFRKQIAKAIEQGHLSLESVDLDDFTEPESLIQPPLTYHHNVVIQHTAIYLIQILRFLRHSRGTHDVQGVAGFCAGLLPAAVVATSHNVIEFMQRAQDFFHVTLWLGINSESYRQAVLSQGGCSPDLPWSMVVHNIGSDEIITRLISDDQAPIYVSARNSPGCVTLSGEGHQLAQFIEKLPSQCRTRPTNVLSLYHNRHRLGEIFNQTVKTLERELSSQWEVSVAPAAPLFSTITGEPLSFSVQSETSITLGRLVSLLLEMILLEPVDWVSVQDKILSNVQQRADSEECEILNFGPGYGVSKSTQKLPQTAEIRDVSAAGASTASDSSASGVSMDDIAIVGMAVDLPGASDADELWD…
Sordariomycetes	Annulohypoxylon_sp._FPYF3050_FPYF3050_GCA_040104375.1	SAT-KS-AT-DH-xCP-MT	MTKFGASASSHTQEFVVALFGPQVTHWTHDTLSSLQSDLLRNSKLQFLAKSLLELPPLWSLLEQDFASEDFHGADSLKSLHDFATGEKLLDPQTLTNTHLAPLTVVSHVVDFIRSVDNPYTKESLLSFEAAQGFCIGFLSAAALASASDWSDFEQNVSNAIRLAACIGVVVDKEEASHAAQDRATAISVYWKTAADRTYLETCLDNIPQAYISCITDDRSFTVTLPKGDEEAFCARLREAKIPTSLVGLNGSYHHSRHIEAADKLVKLCSKNSNLRLPDAESLRLPLRSTADGSVIKTGDLHEIAIQLILCKRAHWFQTVKSTLGDLTPDKATFVSLSTKSCIPRSISAAKQTHDDEGALEEIAVVGMACRFPQADTLEEFWEIISAGKTALSTMPLDR…
Sordariomycetes	Annulohypoxylon_sp._FPYF3050_FPYF3050_GCA_040104375.1	SAT-KS-AT-DH-xCP-MT	MHTTTPKSAENTLLLFGPQLVRLVPSRLVDLRRTVLEDPNLEFLAEIIKDLPSVWTNTIQPSVPRLKSLENAKEKLQQIVTFFDNETEEAPRLAPPYNLLLAPLSVIAQITEYVHHGHQGTAQGFCIGFLSAAAVASARNRTELERLTATAVRLAVAIGGIVDFDEQERSDGQTTLGQSSTWSVRWTSALEREHFEKTLASFPEAYVSCVTDVDRVTITIPESHFVGFSKKLADGGLSAQPIGLCGRYHTTQPERAELVQQVKVLCQQNPDFRFPAVEQLVLPLRSTSDTEVITSGLLHEIALNCILVDVCKWYDTVQATLDVVEGQPVNVIPIGNSSGAIPRSLKSTAAVADEFLGPSSQTSTPPYTTLPNSNLTTGQTTPYSTAPLPVTGTTQPIAV…
Sordariomycetes	Annulohypoxylon_sp._FPYF3050_FPYF3050_GCA_040104375.1	SAT-KS-AT-PT-xCP-xCP-Te	MADQMAFLLFGDQSLDTHGFLADFYRRGNPSVLSKEFLRLAGDALRDEIDRLPREERRKIPIFRTLQQLNERYHAQQIKFPGIDSALLCIAQLAHYIEYEPIRRSEKEHGDATSKQNTKLSGLCTGLFAATAIASSPSLSTLLPIAVQTVLMAFRTGSHVASLAERLSPSTDKSESWTYVLPAAQEAEAKSILAEFHKEEGISQAAHAYVSAVSANNIAISGPPATLRSLFSKDLFESRPTAIPVQMLRLDDEAVTTALAGSKPESVVMSCTTGLPFPQTDTKSLLTAVVHEILNEALIFHKTLSGNANEARGFQGSRILVIPYGPTQAASTLANVLRSQTQAEVILRPAPQVSRETTATSIGNHGSSGNCKLAIVGMAGRFPNSASHEALWELLEKGI…
Sordariomycetes	Annulohypoxylon_sp._FPYF3050_FPYF3050_GCA_040104375.1	SAT-KS-AT-xCP-MT	MGSPGNESHTQGPVILFFGPEIPSFSNQSLLELKLALRNREWATEALSALLPTWDLISTKIPFLNNIPGKRQLGDLETWLREGPPENPVGDLPNVVLAPLTVFTQLAQFQQYSERENSTERGPHQAPPRLIPLGFCMGLLSAFTIAHCKDAASWNYYAAVAIRLAMIIGAAVDATDVSSHLGAFESMAVSWQDSEQERKLESIVDGSRGCAYISVRSDERRSTVAVSKYYAPKMLEELRKAGISTMSTGLRGQFHSDYHGELRDDILRLCDSKPSWFQFMDEHTCVEADHISQPQNLHRIVIEAILFKECNWYGTVLALVSSHTKNGGRLTSVSFGQGRFIPPSLQSKFDNRFEQLMPQGESPPSQSTANLSASGGDELSSTQNIFYPRDSYNTGKKDV…
Sordariomycetes	Annulohypoxylon_sp._FPYF3050_FPYF3050_GCA_040104375.1	SAT-KS-AT-xCP-MT-Red	MTQTFQQNLGTVPTVLLFGSLALSFDATTFHQLRKSITRTKSLTWLLNVLSNLADDCEVVFAAVPTLNQAGIHDQLLDVRDGLTTGRSLRIVGHIPNTVLIPLVVATQLAQYVALLEHCSLTHEQYIAKGDKETLGLCTGLLAGFAVASSHDQTDLEKYGAAAVRLGMLAGLAIDLKNVINPSKSLSVGWSSPETRDAMIQALKDVPEAYISVEYDDNRATITAAASAASRLKSKLRSLGLAASEIGLYGRFHSAENNQILEQVLAHCDKHAEFQLPDASSSAIPTRSGYVDGKCVTQGTLHAHALLAILVDSPTWYKTLDAALADKEDTTTLLSFGFERCVPSSVLRKLGTRLIHLEDSTVKGATFKRDQEEQGCSERPWKDSDIAVVGMACKLPGAN…
Sordariomycetes	Annulohypoxylon_sp._FPYF3050_FPYF3050_GCA_040104375.1	SAT-KS-AT-xCP-xCP-Te	MHRVAVFAGLGSETLFSRTTLDTAVQDASLPESQIILRACHAAFRKQIAKAIEQGHLSLESVDLDDFTEPESLIQPPLTYHHNVVIQHTAIYLIQILRFLRHSRGTHDVQGVAGFCAGLLPAAVVATSHNVIEFMQRAQDFFHVTLWLGINSESYRQAVLSQGGCSPDLPWSMVVHNIGSDEIITRLISDDQAPIYVSARNSPGCVTLSGEGHQLAQFIEKLPSQCRTRPTNVLSLYHNRHRLGEIFNQTVKTLERELSSQWEVSVAPAAPLFSTITGEPLSFSVQSETSITLGRLVSLLLEMILLEPVDWVSVQDKILSNVQQRADSEECEILNFGPGYGVSKSTQKLPQTAEIRDVSAAGASTASDSSASGVSMDDIAIVGMAVDLPGASDADELWD…
Sordariomycetes	Annulohypoxylon_stygium_MG137_GCA_003314315.1	SAT-KS-AT-DH-xCP-MT	MHTTTPKSAENTLLLFGPQLVRLVPSRLVDLRRTVIEDPNLEFLVEIIKDLPSLWSNTIKPNVPSLGSLENAKEKLQQIVTFFENETEEAPRLAPPYNLLLAPLSVIAQIAEYVHHGHQGTAQGFCIGFLSAAAVASARNKTELEGLTATAVRLAVAIGGIVDFDEQQRSDGQTTLEHSSTWSVRWTSALEKEHFEKTLASFPEAYVSCITDVDRVTITIPESHFVGFSKQLADGGLSAQPIGLCGRYHTTQPERAELVQQVKALCQQNPNFQFPAVEQLILPLRSTSDTEVITSGLLHEIALNCILVDVCKWYDTVQATLDVVEGQPVNVIPIGNSSGAIPRSLKSTATVADEFLGPSSQTSTPPYTTLPNSNLTTGQTTPYSTAPPPVTGTTQPIAV…
Sordariomycetes	Annulohypoxylon_stygium_MG137_GCA_003314315.1	SAT-KS-AT-PT-xCP-xCP-Te	MADQMAFLLFGDQSLDTHGFLADFYRRGNPSVLSKEFLRLAGDALRDEIDRLPREERRKIPIFRTLQQLNERYHAQQIKFPGIDSALLCIAQLAHYIEYEPIRRSEKEHGDVTSKQNTKLSGLCTGLFAATAIASSPSLSTLLPIAVQTVLMAFRTGSHVASLAERLSPSTDKSESWTYVLPAAQEAEAKSILAEFHKEEGISQAAHAYVSAVSANNIAISGPPATLRSLFSKDLFESRPTAIPVQMLRLDDEAVTTALAGSKPESVVMSCTTGLPFPQTDTKSLLTAVVHEILNEALIFHKTLSGNANEARGFQGSRILVIPYGPTQAASTLANVLRSQTQAEVILRPAPQVSRETTATSIGNHGSTGNCKLAIVGMAGRFPDSASHEALWELLEKGI…
Sordariomycetes	Annulohypoxylon_stygium_MG137_GCA_003314315.1	SAT-KS-AT-xCP-MT	MGSPGNEPHTQGPVILFFGPEIPSFSNQSLLELKLALRNREWATEALSALLPTWDLISIKIPFLSKVPGKRQLGDLETWLREGPPEKPVGDLPNVVLAPLTVFTQLAQFQQYSERENSTERGPHKAPPRLIPLGFCMGLLSAFTIAHCKDAASWNCYAAVAIRLAMIIGAAVDVTDVSSHLGAFESMAVSWQDSEQERKLESIVDESGGCAYVSVRSDERRSTVAVSKYYAPKMLEELRKAGISTVPIGLWGQFHSDYHAELRDEILRLCDSKPSWFQFMDERSCVEANHISQPQNLHRIVIEAILLKECNWYGTVLALVNSHTKNGGRLTSVSFGQGRFIPPSLQSKFDNRFEQLMPPGGSPPSQSTANLSASGGDELPSTNNIFRLHNSHNMENKNV…
Sordariomycetes	Annulohypoxylon_stygium_MG137_GCA_003314315.1	SAT-KS-AT-xCP-MT-Red	MSDNRDHGTFVVLFGPQVTSFDKQSLDKLREPLLKDTSLHWIKDTVGDLPRLWGVIIESFPDLSGLPGEKLLSDLEKWLRNGVDQRQDMKLSNIILTPLVVIAQLIQYWRYLELNFKGVAGPGTRDLHASFIQQDVETLGFCTGLLSAFTVSCSYNEHGLKQYGAVAIRLAMLIGAFVDVRDTSDDDYGRAKSYALAWNDDEQDTEMRRVIGGFPEAYISVQYDERRVTLTTQEATGPILLQQLKEVGITVTEVGLQGRFHYAQHNHDVESLVQFCDSNLDFQFSGSDGLALPTYANNGGEEIKGGKMHELALRAILVEQSKWYQTFAALQASKLNKQDSVVVSFGLDRFVPPSLMHRLGPRLIHFADIDKDAPETDYGNTQTIGDNDIAIVGMSIKVV…
Sordariomycetes	Annulohypoxylon_stygium_MG137_GCA_003314315.1	SAT-KS-AT-xCP-MT-Red	MTKTFQQNLGTVPTVLLFGSLALSFDATTFHQLRKSITRTKSLTWLLKVLLNLADDCEVVFAAIPTLNQEGVHDQLLNVRDALTTGRSLRIVGHIPNTILIPLVVATQLAQYVALLEHCSLTHEQYIAKGDKETLGLCTGLLAGFAVAGSHGQTDLEKYGAAAVRLGMLAGLVVDLKNVINPSKSLSVGWSSPETRDAMIRALKDVPEAYISVEYDDNRATITTAASVASQLQSKLRLLGLAASEIGLYGRFHSTENNVILEKVLAHCDKHAEFQLPDASSSAIPTRSGYVDRKCVTQGTLHAHALLAILVESPTWYKTLDAALAEKEDTTILISFGFERCVPSSVLRKLGTRLIHLEDSAVKGATFKREQEEQGCSERPWKDSDIAVVGMACKLPGAN…
Sordariomycetes	Annulohypoxylon_stygium_MG137_GCA_003314315.1	SAT-KS-AT-xCP-xCP-Te	MYRVAVFAGLGSETLFSRTTLDTAVQDASLPESQIILRACHAAFRKQIAKAIEQGHLSLESVDLDDFTEPESLIQPPLTYHHNVVIQHTAIYLIQILRFLRHSRGTHDVQGVAGFCAGLLPAAVVATSHNVIEFMQRAQDFFHVTLWLGINSESYRQAVLSQGGCSPNLPWSMVVHNISDEIITRLISNDQAPIYVSARNSPGCVTLSGEGHQLAQFIEKLPSQCRTRPTNVLSLYHNRHRLGEIFNQTVKTLERELSSQWEVLVAPAAPLFSTIIGEPLSFSVQSETSITLGRLVSLLLEMILLEPVDWVSIQDNILSDVQQRADSEECEILNFGPGYGVSKSIQKLPQTAEIRDVSAAGASTASDSSASGISMDDIAIVGMAVDLPGASDADELWNN…
Sordariomycetes	Annulohypoxylon_stygium_TJAS01_GCA_040126005.1	SAT-KS-AT-DH-xCP-MT	MHTTTPKSAENTLLLFGPQLVRLVPSRLVDLRRTVIEDPNLEFLVEIIKDLPSLWSNTIKPNVPSLGSLENAKEKLQQIVTFFENETEEAPRLAPPYNLLLAPLSVIAQIAEYVHHGHQGTAQGFCIGFLSAAAVASARNKTELEGLTATAVRLAVAIGGIVDFDEQQRSDGQTTLEHSSTWSVRWTSALEKEHFEKTLASFPEAYVSCITDVDRVTITIPESHFVGFSKQLADGGLSAQPIGLCGRYHTTQPERAELVQQVKALCQQNPNFQFPAVEQLILPLRSTSDTEVITSGLLHEIALNCILVDVCKWYDTVQATLDVVEGQPVNVIPIGNSSGAIPRSLKSTATVADEFLGPSSQTSTPPYTTLPNSNLTTGQTTPYSTAPPPVTGTTQPIAV…
Sordariomycetes	Annulohypoxylon_stygium_TJAS01_GCA_040126005.1	SAT-KS-AT-PT-xCP-xCP-Te	MADQMAFLLFGDQSLDTHGFLADFYRRGNPSVLSKEFLRLAGDALRDEIDRLPREERRKIPIFRTLQQLNERYHAQQIKFPGIDSALLCIAQLAHYIEYEPIRRSEKEHGDVTSKQNTKLSGLCTGLFAATAIASSPSLSTLLPIAVQTVLMAFRTGSHVASLAERLSPSTDKSESWTYVLPAAQEAEAKSILAEFHKEEGISQAAHAYVSAVSANNIAISGPPATLRSLFSKDLFESRPTAIPVQMLRLDDEAVTTALAGSKPESVVMSCTTGLPFPQTDTKSLLTAVVHEILNEALIFHKTLSGNANEARGFQGSRILVIPYGPTQAASTLANVLRSQTQAEVILRPAPQVSRETTATSIGNHGSTGNCKLAIVGMAGRFPDSASHEALWELLEKGI…
Sordariomycetes	Annulohypoxylon_stygium_TJAS01_GCA_040126005.1	SAT-KS-AT-xCP-MT-Red	MSDNRDHGTFVVLFGPQVTSFDKQSLDKLREPLLKDTSLHWIKDTVGDLPRLWGVIIESFPDLSGLPGEKLLSDLEKWLRNGVDQRQDMKLSNIILTPLVVIAQLIQYWRYLELNFKGVAGPGTRDLHASFIQQDVETLGFCTGLLSAFTVSCSYNEHGLKQYGAVAIRLAMLIGAFVDVRDTSDDDYGRAKSYALAWNDDEQDTEMRRVIGGFPEAYISVQYDERRVTLTTQEATGPILLQQLKEVGITVTEVGLQGRFHYAQHNHDVESLVQFCDSNLDFQFSGSDGLALPTYANNGGEEIKGGKMHELALRAILVEQSKWYQTFAALQASKLNKQDSVVVSFGLDRFVPPSLMHRLGPRLIHFADIDKDAPETDYGNTQTIGDNDIAIVGMSIKVV…
Sordariomycetes	Annulohypoxylon_stygium_TJAS01_GCA_040126005.1	SAT-KS-AT-xCP-xCP	MYRVAVFAGLGSETLFSRTTLDTAVQDASLPESQIILRACHAAFRKQIAKAIEQGHLSLESVDLDDFTEPESLIQPPLTYHHNVVIQHTAIYLIQILRFLRHSRGTHDVQGVAGFCAGLLPAAVVATSHNVIEFMQRAQDFFHVTLWLGINSESYRQAVLSQGGCSPNLPWSMVVHNISDEIITRLISNDQAPIYVSARNSPGCVTLSGEGHQLAQFIEKLPSQCRTRPTNVLSLYHNRHRLGEIFNQTVKTLERELSSQWEVLVAPAAPLFSTIIGEPLSFSVQSETSITLGRLVSLLLEMILLEPVDWVSIQDNILSDVQQRADSEECEILNFGPGYGVSKSIQKLPQTAEIRDVSAAGASTASDSSASGISMDDIAIVGMAVDLPGASDADELWNN…
Sordariomycetes	Annulohypoxylon_truncatum_CBS_140777_GCA_022578515.1	SAT-KS-AT-DH-xCP-MT	MTHSKPFPSLLVFGPQAGFPSQEVLEDLRQELIGNPQLSALASAAAELPQFWETLVEFDDSLQLLPGPKYLNELKQWVKEGGPFPNHNISPNLYALPATILLQISQYARYLRQLGNGSHHQVLESVSAAGVQGFCVGFISATIVASSKTEADIGPIAAAGLRLALCIGAYVDLDQINEYIDGFACVAIRWREGNAEEKAKIDTIIQSYPEAYISSITDTTSVSVTLKTEDLGDFIQQIRNQGLRATTVPVNGRFHTSVHSDASNKIAKLSLRTEALRFPEAESLYAPLRSTIDGEIIRKGSLTKLIIHNTMLNTADWYTTMREATLQLPHSNETVAYAGFGNNIPSSLVQAASFQVFNLGELKGGTDTQSYGPLSTNGLPNGSKPFDEYPSHSIAIVGM…
Sordariomycetes	Annulohypoxylon_truncatum_CBS_140777_GCA_022578515.1	SAT-KS-AT-PT-xCP-xCP-Te	MADQMAFLLFGDQSLDTHGFLADFYRQGNPSVLSKEFLRLAGDALRDEIDRLPREERRKVPIFRTLQQLNERYHAQPINRSEKEHGDVTDKKNTKLSGLCTGLFAATAIASSPSLSTLLPIAVQTVLMAFRTGSHVASLAERLSPSTDKSESWTKMLRLDDEAVTAALVGSKPESVVMSCVTGLPFPETDTKSLLTAVVHEILNEALIFHKTLSGNADEARGFKGSRILVIPFGPTQAASTLANVLRSQTQAEVILRPPPQVSRETTATSIGNHGSSGNCKLAIVGMAGRFPDSASHEALWELLEKGIDAHRVVPADRFPVETHYDPTGKAINTSHTPYGNWIENPGHFDPRFFNMSPREAFQTDPMQRMALTTAYEALEMSGYVPNRTPSTRLDRIGT…
Sordariomycetes	Annulohypoxylon_truncatum_CBS_140778_GCA_902805465.1	SAT-KS-AT-DH-xCP-MT	MTHSKPFPSLLVFGPQAGFPSQEVLEDLRQELIGNPQLSALASAATELPQFWETLVEFDDSLQLLPGPKYLDELKQWVKEGGPFPNHNISPNLYALPATILLQISQYARYLRQLGNGSHHQVLESVSAAGVQGFCVGFISATIVASSKTEADIGPIAAAGLRLALCIGAYVDLDQINEYIDGFACVAIRWREGNAEEKAKIDTVIQSYPEAYISSITDTASVSVTLKTEDLGDFIQQIRNQGLRATTVPVNGRFHTSVHSDASNKIAKLSLRTEALRFPEAESLYAPLRSTIDGEIIRKGSLTKLIIHNTMLNTADWYTTMREATLQLPHSNKTVAYAGFGNNIPSSLVQTASFQVFNLGELKGGTDTQSYGPLSTNGLLNGSKPLDEYPSHSIAIVGM…
Sordariomycetes	Annulohypoxylon_truncatum_CBS_140778_GCA_902805465.1	SAT-KS-AT-PT-xCP-xCP-Te	MADQMAFLLFGDQSLDTHGFLADFYRQGNPSVLSKEFLRLAGDALRDEIDRLPREERRKVPIFRTLQQLNERYHAQPINRSEKEHGDVTDKKNTKLSGLCTGLFAATAIASSPSLSTLLPIAVQTVLMAFRTGSHVASLAERLSPSTDKSESWTPTAIPVYGPYHAPHLHGLVDIRKMLRLDDEAVTAALAGSKPESVVMSCVTGLPFPETDTKSLLTAVVHEILNEALIFHKTLSGNADEARGFKGSRILVIPFGPTQAASTLANVLRSQTQAEVILRPPPQVSRETTATSIGNHGSSGNCKLAIVGMAGRFPDSASHEALWELLEKGIDAHRVVPADRFPVETHYDPTGKAINTSHTPYGNWIENPGHFDPRFFNMSPREAFQTDPMQRMALTTAYE…
Sordariomycetes	Aquanectria_penicillioides_NNIBRFG19_GCA_003415625.1	SAT-KS-AT-PT-xCP-xCP-Red	MTRHLKLYVFGDQTFDIQPHLKDLLQHRDNPSLEDFLVKAYDAIRAEIFTLPRQVRDDVPRFTCYDDLVLWNQSGKRCVPLDMAVTCMYQLGVFISQADSFYSDRTLSKCIGLCTGTLAAAAVSCSRNTRDLVALAVHAVTVAFRIGMHVTDVATRVAPSHEFGESWSIIVPGAKASEAVENFCKETTLPLTSKPYISAYAPNGITVSGPPNSLAQLVSSETFKDVRSKSIPIYAPYHAPHLHSQSDVSDLVAELVGDRPAASSGTDSFSPETGSELPETDFRLLLEDAVKNTLLEPIRWSAILDGLHTYIQKLDPQSFAIVPIATTADQLILTALKQTSLRSLMPSVKPQGKREYSRDASSSNPKKPKLAIIGMSGRFPGAKDNEAFWDLLHQGLDVH…
Sordariomycetes	Aquanectria_penicillioides_NNIBRFG19_GCA_003415625.1	SAT-KS-AT-PT-xCP-xCP-Te	MDSSNNTMGSYRILLFGDLSVAFEDDLRALLHVRDNPLVSSFLEQVGGRMRNEIGRLGTQRQTLFPRFTTLIDLLSKLEETEGTPILRFCLLSLLWKKWPTVPGAEDTCCLGVCAGSFAAAAISCSRSLSELLPIAIEAVVDSFRTAMSSFMTRVNIIGRAEDENRCWSVVVSGMESDLQQKILDFTTANPLHKTWRPYISAVTPNHVTISGPPNILRRENQNTSRIKYGCWIEEPGLFDARFFNISPREAENTDPAQRLAITTVYEAMEMAGMVPNRTPSTQQDRIGVFFGTTSDDWREVNSGQDVDTYFIPGGNRAFVPGRISYFFRFSGPSLSMDTACSSSFAAIQTAYNFVGLDRGHFLSTTGNCNAFDDGASGYCRADAVGSVILKRLDDAEMD…
Sordariomycetes	Aquanectria_penicillioides_NNIBRFG19_GCA_003415625.1	SAT-KS-AT-PT-xCP-xCP-Te	MEHHETLYLFGDQTFDTEPHLHKLLDAKNSNVVLREFLDKAYDAIRRQIFHLPRHVRQDLPRFTSIEDVLLWKPSEGASRSVPMDMALTCMYQLGSFIIGQTGNEYPKPEDACILGLCTGALAAVTVSCSRSLAELVPRAVEAVVVAFGVGACVANMKMRLVSPEDAGRTWFIMVAGPYASQAVQRFCEESPLPTTARPFISAYTPSGLAVSGPPSSLDALVSSTHFRGLKHKAKAVYAPYHAPHLYSGADIDDILAPLGLDSESQTCEKIPVMSSNGDWIEGSHFKDLLRVALEHILLHPIRWNGILEGVRGRIRRSGEPRRCKVELFGSRADQLIYTALKQSPTGPGRTLSPRPALERTSSDVGAVPGTPTTQARPKIAIIGMSGRFPGGANNSEAF…
Sordariomycetes	Arthrinium_koreanum_KUC21332_GCA_017163955.1	Atg-KS-AT-DH-ER-KR-xCP	MGVGVTRDESTWTESSQRWSEPKLVRGSNLNISGLSSALNYGMQAYEGMRAIRDASGQIRLFRPNKHAARMRHSCAYVSIPEIPETHFTRCVSLAVALNAQFVPPYGSPAALYVRPLAIGSGAQLNLIAPSEFKFCVFVQPTAALLGQSRPISALVLDEFDRAAPRGTGSAKVGGNYAPAMRWHAQARAEGFGITLHLDSQTRTEIEEFSAAGFIGVKRAKGNDGTLAPDGGAVTLVIPDSKSIIKSVTSDTCIEIGAALGWNIMIRPICYEELPEFDEVLAVGTAATIVPIEAITRKSRPETVTYEDASKQVAGGQESCFSVLFKALLAAQRGEGKTYGDGDWSVVIQEPSCYITKADRVEMTPQARIGHAPVTSEKLPLRRHTTFNTQTGAPETDRT…
Sordariomycetes	Arthrinium_koreanum_KUC21332_GCA_017163955.1	A-xCP-KS-AT-KR-xCP-Red	MTDLIAQPQDVQQGGIVDEYGRTVDVTAPRACFHQLFERAAVIYSSNTALICGGAALTFRELNTQANRFARVLLGHGIGHGDMVGVALDRSVDLIAVLLAVMKTGATYVPIDPSLPVERINQMMEDANPKLLVTDTSALGSFSTWSNICLTVNTALHMMLLSDPGGGNLDVPTSSDDLVYVMYTSGSSGRPKGVEISHGSVSNLLLSMQQQPGCNEKDRLLAITTVSFDMAVLEMYLPLLCGGTVVLAQKHQVKDPSALVRLMEQHDITMMQGTPAVWDMILISGWQGQPRLKKIFCGGEALSRRLADRLLGCGDVLWNMYGPTEATVYASIWQVARGDDILIGGPITNGHLYVLDAHLSPTAAGYPGELYIGGAGVARGYRNNTELSRHCFLRDPFHG…
Sordariomycetes	Arthrinium_koreanum_KUC21332_GCA_017163955.1	SAT-KS-AT-PT-xCP	MAFPTSPTDSTTFSEQSDVMSALSTKIVFFGNDFSDHNLPSLFGSFQKHSRDRSFPFLSQLLTETAAGVSVSSSLSDLVQTGVESARIAWRLGVHVNSKSQLLESAQTEGSPDSWAYVVTGLSVEEIQSELDVINSKSSHPELLKIFVSAADKSSVSVTGPPSRLKAAFHSSHVLRYSKWLPLPVYGGLCHAPHLYTNDDAITIVYESDFRSFVDQKPVLPLYSSQSGEPFKEKAYAQLLNAIVIEILTNGIYLDNLEAGLIGAIRQSSYCEILRFGKSLVSDHILAEIQSQLPQLKVNDDHQSLATWPTSRDSTGIHPTSTKNAKLAIVGMSCRLPGGADDNEKFWQLMMDGRDVHSRIPADRFNLETHFDPTGKVPNSTPTPFGNFIDQPGMFDAGF…
Sordariomycetes	Arthrinium_koreanum_KUC21332_GCA_017163955.1	SAT-KS-AT-PT-xCP	MRSKANSSMIKMSSAKVLYFSGEIPQGDPEGDQRVLFRKLHLLSKERDHVVLASFLESVTAAVKDEFSRLSRPQRDLVPAFESVLDLTDHVVKLRKTPIGGAIERVLVLVFQVGSFLAYHEAHPLEYNFTPNTTILIGRGSGLLSAAAIGLSPSFSMIPGIAQEITRVSFRFGLVVDQVCRSLEVSQDEINADGAWVYCVHGVDEDHARESVQKFNDEKAYPATNVANVFNVDNAGGSVSIGGPPKTLKALFAESEGFKKTKNVAMKKIQGMWHTDKVYGTEHVGPVIPKIESTRELFLPLISPVSGESFRETEAGPLLEQIMEEILTERVRWDLIIDTVTKQLKQMSPRSAQLVSIQPSHYNHNLVESWRGELPNAAVSDLAILPAVLDLAIGTSPPK…
Sordariomycetes	Arthrinium_koreanum_KUC21332_GCA_017163955.1	SAT-KS-AT-PT-xCP	MTVASTTTAPIVLLFGGYTEPWLDSIDRLHEQAGSCDWLRHFLNDIASIVRTETICMHPNIRNSLGPSGIFSSVQEVADKYRDRDDDVGFVQCIMSYIVRAVILLRWVHDDPDVLKASPKPEGLGISGGLINAAVLAISNDFESLYEASVVTARLVCRLCEVAGQVSRAIEEERSDGASWGCAVIGASPDQLDAILHQIQEPKKVPNLKRARVGIRGDHWGTVIGPPSVLDMCLEHAAMTDLGQQRLPIYSMQHNYDLGQSHREYIAGRSALHSRAVHPGFRLWGLQETKGDSPPPSYANWGELLLSVVDSAFSKPVDLVDMVQGLSTRLGSDCEPIGLKIMGPTWFANTLSSKLKAKGKRVSAVEHTVLGTDGLGNSSDPTSSNYEGRIAIVGIAARA…
Sordariomycetes	Arthrinium_koreanum_KUC21332_GCA_017163955.1	SAT-KS-AT-PT-xCP-xCP-Red	MREQHKLYLFGDQTFDVQPHLKGLLCHRDNPVLEDFLLKAYDALRKDLYMLPAEIREDLPRFTSIDDLLLWKNDGKRCIALDMALTCLYQLGTFISVCETAALPLLAKPYISAYAPNGITVSGPPRSLQKLVDSDSFKSLPSKRISVYAPYHAPHLFSPEDVGEIVGHLKPRAANKSYLPLLSGCGDSVQDSDFDVLLRLAVEQILLQPIQWNKVLERLRIHVETKQPKGFQVVALGTRADQLIYTSLKQTPLAHLLSPLPPSPRAQQPNISGEGSYPNPGKPKLAIVAMSGRFPGARDNEAFWDVLHGGLDVHQEVPRSRWDTRTHVDPTGARKNTSTTPYGCWLDDPAGFDARFFNVSPREAPQIDPAQRLALMTAYEAIEQAGIVPDATPSTRRDR…
Sordariomycetes	Arthrinium_koreanum_KUC21332_GCA_017163955.1	SAT-KS-AT-PT-xCP-xCP-Te	MADQMAFLLFGDQSLDTHGFLADFYRLGNPSVLSKAFLEAAGEALRVEVEQLPRVERTKIPMFRTLRQLNERYHAQSIKYPGIDSALLCVAQLAHYIDRSEKEYQDATEPENTYLSGLCTGLFAASAIASSPSLSSLLPIAVQVVLMAYRVGSHVASLAERLSPSTDKSESWTYVVPGAKESTAKSILDDFHKSEGISQASHAYVSAVSASNIAVSGPPATLKSLFSKDLFDSRPTAIPVYGPYHASHLHATADLDAILRLNDDSVSAALADSKPRSSVMSCVTGASFTETDTKALLRAVVWEILNEPLLFHKALSGSIGHARGFKGTRALVIPYGPTQAAGTLANLLKTQTELEVVLRNPPTISRESNTASIGNHGSVGKCKLAIVGMAGRFPDSASV…
Sordariomycetes	Arthrinium_koreanum_KUC21332_GCA_017163955.1	SAT-KS-AT-PT-xCP-xCP-Te	MQSATVLLFGDQLASKTSAVARLYKIAKTRPSLRAFLRDATDVVQCLRQNLHPCERQLYGDFADIRDLTCRHESAEHLNEAVGTTLITIIQLAELLIVAEDEPAILCTENQTHGIGVCIGLLAAAVAATATTARDVVRLGLECVAISFRLGIELWRRTRSVEDSPESWACTFVGIDAAQVQQRLDLFNHDCPRLRTAYIGVEASTWATVFAPPATLKRLLDSEHFNQVSTSRLPSAIAVHATHLPALDVDHILGSSSLLDTLTRCECVFSSSTCEPYDALTLRDLLRMVIADIAHLPLYLEGTIKSVASSLQGRDNARLLPVGPTHSVSFVQRELQRVITTVNIENIIVDDEVLNSEGYSRGSDRVAIVGMSGRFPDSESTSELWDLLLSGRSAHQHIP…
Sordariomycetes	Arthrinium_koreanum_KUC21332_GCA_017163955.1	SAT-KS-AT-xCP	MDENTSPSNFATPSSTATTGGRKPSARLIVFSNELPSGDVQDLFRRLHRHAKRPQYPLLARFLRGCVSVLRYEVQKLPRDQRESVPPFGDVITLGSQWETLRNGPIGGAWEGAFVCIYELAMLIGIGIFSAASLAVSHSLADLASFGAEAVRIAFVFCRHVGQVSQRIESSLDVAKDTPTQTNNSITTWAAVITDVPAKVVQDELDRFNDGRSLDYVGMGMTTTLTRISISHVDRTSVGITGPPTRLTELFHQSPTLSSSRHAALPISGGLCHVPNVYDQDDVRAILETAQVWDKWGSRPVQKALLSPYTGAAFPATDAYQLVKAICTEALTKPLFFDKLAEGASIHLSQELEVQMVSLSWDADTPERFWDLLFEGRDTHSTVPTDRFDLEAHFDPSGE…
Sordariomycetes	Arthrinium_phaeospermum_M.B.Ellis_GCA_006503535.1	SAT-KS-AT-PT-xCP	MVSAKVLYFSGEIPQGDPEGDQRVLFRKLHLLSKERDNVVLASFLHSVTLAVKDECSRLSRPQRELIPPFESVLDLTDHVVQLRKTSLGGAIERVLVLVFQLGSFIAYHEAHPLEYNFTGANTSLIGRGSGLLSAAAVGLSPSISMIPSIAQDIARVSFRFGLVVDQVCRSLEVSKEEINADGAWVYCVHGVDEDDAREYVQQFNEEKGYPPTSGATVFNVDNAGGSVSIGGPPKTLKALFSESDGFKKTKNVAMKKIQGMWHTDRVYGTEHVGPVIPEFDSKRALHMPLISPVSGEPFRETQAGPLLEQIMQEILTERVRWDLIIDTVSRQLKHMMPESAQLVSIQPSHYNHNLVERWRAELPHAAVSDLALMPAALDLPLGTSPPKDTRSSKLAVVG…
Sordariomycetes	Arthrinium_phaeospermum_M.B.Ellis_GCA_006503535.1	SAT-KS-AT-PT-xCP-Te	MNSLHRNVLLFGDVTDPWVDGIDYVFRQAAAMPWLRSFLGHLFSAFRAETKHMDRTMQDSLGTCSDFQEMAQRYRDTADDFGMGNAMLLFALRAAILLETALKEPSILNPASTKSEVSLVGISGGLFSAAAVPVATNFETLQQACLEAAKVFCRVCNLSLEQSRAMEDQSGAWGWAVLGLSPEELAKALEKFQDSIGVPTAKRARIGIIGDRWSTVIGPPSILTLIMSRCAALKDCPKNQLDIRAMQHTLSITDADVAYVVGTSPFLDTPLRSGYKIWGFDDPNATYSTWGDLLRAAVPQVLSRPLDIRQVLGDVRSYLGDSPQVDVKMMGPSGHTTYLVKTLQIPGRDISISNYLEDQEAIEDTGTAGKIAIVGMGAKGPGSEDLEEFWNVLLAGQDL…
Sordariomycetes	Arthrinium_phaeospermum_M.B.Ellis_GCA_006503535.1	SAT-KS-AT-PT-xCP-xCP-Te	MQSTAATVLLFGDQLASKTSAVARLYEIAKTRPSLQAFLRDATDVVQCLRQDLYPCERQLYGDFADIRDLTCHHESAEHLNEAVGTTLITIIQLGELLLLAEDEPAVLSAESQTHGIGVCIGLLAAAVAATANTARDVVRLGLECVAISFRLGIELWRRTQSVEDSPESWACTFVGIDAAQVQQRLDLFNQSCPRLRTAYIGVQASTWATVFAPPATLRRLMESEHFSQVSTSRLASAIAVHSTHLPVLDVDRILGTSPLLDTPTPCEGIFSSSTCEPFDASTLRDLLSLIVADIAQNPLYLEDTIKNVATALHGNESARLLTIGPTHSVSFVQRELQRAVPAVTIAHVGIDDDHSSEGYSRGSDRVAIVGMSGRFPDSDSISELWDLLLSGRSAHQRI…
Sordariomycetes	Arthrinium_phaeospermum_M.B.Ellis_GCA_006503535.1	SAT-KS-AT-PT-xCP-xCP-Te	MADQMAFLLFGDQSLDTHGFLADFYRLGNPSVLSKAFLEAAGEALRVEVEQLPRVERTKIPMFRTLRQLNERYHAQSIKYPGIDSALLCVAQLAHYIDRSEKEYQDATEPENTYLSGLCTGLFAASAIASSPSLSSLLPIAVQVVLMAYRVGSHVASLAERLSPSAEKSESWTYVVPGAKEATAKSILDDFHKSEGISQAAHAYVSAVSASNIAVSGPPATLKSLFSKDLFDSRPTAIPVYGPYHAAHLHATADLDAILRLNDDSVSAALADSKPRSSVMSCVTGASFTETDTKSLLKAVVWEILNEPLLFHKALSGSIGHARDFKGTRALVIPYGPTQAAGTLANLLKAQTELEVVLRNPPAISRESNTASIGNHGSTGKCKLAIVGMAGRFPDSASV…
Sordariomycetes	Arthrinium_puccinioides_CBS_549.89_GCA_022414665.1	SAT-KS-AT-DH-xCP-Te	MLDPLAPGTYFYAKSRHLLAVDPSLFSSPRDLLKPAVQYHTHPVLQATTIYLCQLLRYLAETLRQHEAYEHSFDTLQATAGFSSGILPAAVVARSRSLDEFVASGIQGFRLAFWIACRSLIWTLETTGNSGDEVGEHVDAKATLSLVIRGPSHAQENCPNFSKGPRRMEISAISNSNTVSISGPKSDLGAFWAQLQATPELTTTFAITLLDLSPFKSGGNPTALSSSHQNDVAIVGMSVQLPKGKGTEQLWETISQGLNAVQEIPKNRFELSDYYAEDSDKPRSMHTKHGAFLEDPFSYGSFDNSFLNISPREAKSMDPQQRVLLHAAQEALEDSGYVQDSSPSFQRATIGCYIGLATGDYTDNLRNDIDTFYSSGTLRAFHSGRISYFFRLGGPSIVT…
Sordariomycetes	Arthrinium_puccinioides_CBS_549.89_GCA_022414665.1	SAT-KS-AT-PT-xCP	MSSYTSPTTPDSLDEYLDMKLLYFSNEFPRDDLASLTRHLHLLSKQKRYPLLANFFDEVTDAVRSEVRELPDSLRTSFPPFDVVLNLAGFADLRKGVLGASIDGVLLVAVQLGTFVKYYEDHPDQYGFHASNTALAGLVAGAEVARLAFRLGQVVDRVSSNLEARDPTAPYGSWASVVADVAVSDVQQELDSLHAQERTPSTAKVFISAYSRNSVTVSGPPARLSHLFRVSEYFRGRKIVALPVYGGLCHAAHIYNQDHVSEVVSMSPRLATLDSRAAPELTAISTSTASPFRATSATELFRQIITEIMTREIRWDNVVDAVLQQSLALSAYRLQVHVFRTSLPIHDLLAAFSSQQPNVNAITVDLVPSIAAPIDTSSVSGSTSKAKIAIVGMSCRMPG…
Sordariomycetes	Arthrinium_puccinioides_CBS_549.89_GCA_022414665.1	SAT-KS-AT-PT-xCP	MKLIYFSNEFPYDDLQTLFRGLLQHSKGRDHPTLALFFQEAKLALQDEVRQLPVELKALVPPFESILDFADFTSLRHSPLSGSLDGILLCTLQLGALIGHYERCPGDFDSADRSTVIAGMGLGLITSAALSLASTVADLATVGAQVVRQAFRLGVLVDEVSLQLQPRNAADAKTPDSWAYVLPETTADEAQLALDEFHRKERTPEAGKIFLSAVSASSVTISGPPARLKVLFRTADFFRDRKHIALPVYGGLCHAGHIYTEENVRWVVQTPSMHQLDARVTPRIPLLSTGTGRPFEPKPETASELFGHIIREIMTQRIEWDKVIGYVTERAQDTDDTQCQVLDFRVSLPINDLTNSLAKHVPGLEIFSREVISWIHEADAGAGIRPRGSQQSKIAIVGM…
Sordariomycetes	Arthrinium_puccinioides_CBS_549.89_GCA_022414665.1	SAT-KS-AT-PT-xCP	MSLGLLPAAATAVAASVVELVSVGTDVVAMAFRLGVHVAQVSHGLEARTSDSLPGSWAYTVTALSIEEVTEEILRHNLLTGNAGPCRLFISAADKHSVTVSGPPTRLKAFFKSSQLLRYSNFAPLPVYGGLCHSPYAYGQDDVDAVLGPWSCSALVRRPVLSPSTGKAFSATRGLDLFEAIVTEILTRATFLDKVVSGLSLYNEVHKTGLTIFLTRNTAMSRMIASAIQTSISPAPTTRSILGSWLTSEGDDGDHSTGRQPRLAIVGMSCRMPGGADDLERFWELMAQRKDVHQTVPADRFDVSTHYDPSGKKPNTSETPFGNFITEPGLFDAGFFNMTPKEASLSTMLPLISTRPYQASDDWREVNAGQHIGTYGVPGGERAFANGRINYFFKFGGPS…
Sordariomycetes	Arthrinium_puccinioides_CBS_549.89_GCA_022414665.1	SAT-KS-AT-PT-xCP-xCP-Red	MTDHMKLCIFGDQTCDLTPHWKELFQIRNNPAVEDFLAKSYNAVRNEIYNLPVEARNALPRFTCLNDLILSNQAGSRRCLPIDTATSCIYELATFIGAVDAVIAAFRTGSQATETARTLVPRTSQDEFEGSWSILFSGLADSSEALSKYCERTALPVTARPYISASSANAITVSGSPSTLARLAASEEFKGIRSKKLPVYGPLHAPHLYTGANIDEIVKGLGLACGAERPEHIAFLSSTGAMIQGPDFASLLRAAVDAIVAQPMRFPVLLDELQSHISAVNPKSFDMVPIATTVDRLVYSTFKTTPLASLVSPPARPKTSPSSETSPPNPKTAKLAIIGMSGRFPGGANSTEEFWDILYQGLDVHKSVPPRRWDPDTHVDPTRKKKNTGSVPWGCWIDD…
Sordariomycetes	Arthrinium_puccinioides_CBS_549.89_GCA_022414665.1	SAT-KS-AT-PT-xCP-xCP-Te	MADQMAFLLFGDQSLDTHAFLADFYRRGSPSILSQAFLDQAGEALRKEIELLPRVERKKIPVARTLRQLNEKYHAQSIKYPGVDSALLCVAQIAHYIESESWTYVVPGAKEGEAQSILAEFHKSEGISRASQAYVSAVSASNIAVSGPPATLKLLFSKDLFDSRPTAIPVYGPYHAAHLHASADLDSILCLNDERVTAALAGSKPRSSVMSCVTGASFTETDTKSLLRAVVREILNEPLLFHKALSGSIGHASNFKGTKALVIPFGPTQAAATLANLLKSQTKLEVVLRNPPQVSRESNASSVGNHGSTGKCKLAIVGMAGRFPDSASVEALWELLEKGIDAHRVVPAERFPVDTHVDITGKTMNTSHTPYGCWIKDPGHFDPRFFNMSPREAFQTDPM…
Sordariomycetes	Arthrinium_puccinioides_CBS_549.89_GCA_022414665.1	SAT-KS-AT-PT-xCP-xCP-Te	MQSATVLLFGDQLAPKASAVARLYDIAKTRPSLHTFLRDATDVVQCLRQDLPPCERQLYGDFADIRDLTCRHESAEHLNEAVGTTLITIIQLGELLLLAEDEPAILCSESQVHGIGVCIGLLAAAVAATATTARDVVRLGLECVAISFRLGVELWRRTRSVEDSPESWACTFVGIDTAQVQQRLDVFNHGCPRLRTAYIGVQASSWATVFAPPATLKRLLDSEHFSQASISRLPSAIAVHAAHLPALDVYRILGDSSLLDTLIRREDIFSSSTCEPFAASTLRDLLHLIVADIAQHPLYLEETVKNVASSLRGRDDARLLPVGPAHSVSFVQRELQRVVPTVTTVHIGIDDVPSSEGYRRGSDRVAIVGMSGRFPDSESTSELWDLLQSGRSAHQRIPE…
Sordariomycetes	Arthrinium_puccinioides_CBS_549.89_GCA_022414665.1	SAT-KS-AT-xCP-xCP	MSVLPSLIAFGPVAQWPSRQGLQLLATKLQETDQLRALTSALQDLVPLWKALTDQDSALTTVDGEGAIKQLTEAFHGEDAHVSDGDENRNIVLLPMTIVKQIALYLDYLRHSEVDADHASVLERIADGGGGVQGFCAGLLSALAVASATSTEDVARMTATAMKLAFCIGAFVDLDQTRAHGASQAANLCVRWKSSTTLESIRELLSDYHDTYVAVTQDIRTATLTTPLSLCARLKKDLSQKGVSVIETWFAGRYHSRHHRDVPGMILKACHGHLDPGYGDQELVRCNSDARLFPRPDALRRVLDSILLHRADWFLTISKSVSALPEDLANALILSIGADAVPNTIMKTCNVLQIRAFSNSGPNTPRQTVMDSAPSQPARDLYPDDAVAVIGMSCKFPGA…
Eurotiomycetes	Arthrocladium_fulminans_CBS_136243_GCA_003614865.1	SAT-KS-AT-PT-xCP-xCP-Te	MEEVYVFGDQTADCRTFFTKVFPRKDDVLLQAFLERASEAVRVENRNRSHTSKAVPDFNTIQELVDRYYRSEQKDAAVESSLLCISQFCHFIGAFEERSPTYIPSNTDARLVGLCTGLITATAVSCADSLTALLPLAIESVRIAFRAGAHVGKVAQQLEVESGSKSWSTIVAADEKSAQAALDSFHAEKNISPANRLWISASSATSVTISGPPATKARCFEHSEFFRSKKNAPVPVFAPYHAAHLHSEKDVQNILRPQTKDIFGSQTQKFPVCSSITGQPIQGKNGLEILEEALREVILEPIRWDKVLKYCASGSPTEAKVFAVGVTNLTSSIASALKANSKVTVEDQSTWTTLAPAGTKQSKREADIAIVGFSGRFPDAANHELFWDLLVKGLDVHRP…
Eurotiomycetes	Arthrocladium_fulminans_CBS_136243_GCA_003614865.1	SAT-KS-AT-PT-xCP-xCP-Te	MSSSTRVFLFGDQTYDFVEDLTDLIRTKDNPILTAFLDQSHHVIRAEMSQTLPQKERKVSRTSNLAHLLHKYKEGCLNPAFQIALSCICQLGIFIKQYGRPGRPYPSASDAYMLGLCTGALAAAAVSSSSSLSELLPAAVQTVQVAFRLGLCAVDMRDRIVPCNDGSPHWWSAVFHGLNPTQAQVKLDMFCTEFQLPRASQPWISATAAKATTISAPPKVLSQLRTSKQFSELKSKGIPVHVPSHSSRLFTQQNVSGILEPVIASNWSTYTAKVPVISSASGKISWAGTFRGLLEKALCECLLECFQWDVVVKGFPELMQTRGIDSVTITPIATTAEGDLVSSLQEVVVQVDRDNAEYILGASLPSGKPKLAIIGYSGRFPEAQSPAAFWDVLYEGIDT…
Eurotiomycetes	Arthroderma_uncinatum_CBS_119779_GCA_011692745.1	SAT-KS-AT-PT-xCP	MPGPVENQSSTWDKCQTSAQARLLYFGNEFPNDDLNDLFRRLLQHSKDRRFRLLAAFLEESTLVIQDEIAKLPHQIKSQVPHFNNILTLSENGYLRELGLGAAMESALLIVLQIGLFIGHYEAIDAELTLSDGLTTLAGLSVGLFSGAAVALSTSLAEVVKNGAECLRVSFRLGVYVGDFSGKLEAPQPDGILQSWAHVITGMTEKSVQSELARVNEELGNPEISKVFISAADRSSVSVSGPPSRIKSAFLQSSDLRYAKSLPLPVYDGLCHATHLYSQEDVNAVLDISESLIPVSRPLQLPLISSQTGKPFTATTAGQLLLEIATELITGTIYLDNVTAGIIDHINAVGGSATCQIDTFRTSLVFKGILETIVASFPDMEISRNDMVEWVHKDFGTRR…
Eurotiomycetes	Arthroderma_uncinatum_CBS_119779_GCA_011692745.1	SAT-KS-AT-xCP-xCP	MHEACHDRNGSRQALSVLFGPQGTVTPKSMLEIRTLLQENPGLDFLSKTISDLPELWPAIVEVLPQLCKLPAKEKLAELCQFFQGGPVPTFTEPTNNLLLSPLGVISQTIDFWKLSHGLDNRLSIGSQLADVQGFCLGFLTATAISCSNNEAEFQMLASKAVRLALCTGALVDVESLNSSNGHDCSSTIAVRRKSPAQSQHLDNALKAYPRAYISCITDSKTVTVTIPESELAPFMADLAKQNLLSMPLPPRGRWHNRDNLEGLRAISTLCDRDERFRLPDADALNSALLSNITGETITKGALHNIALHSILTDQSRWDLMFDTFFSAMKTRNVDYRYINIGETVNVPRVANATSAAGREAPVNHHGENHGTHGGNHADAHVSSSTQQSIPKGLDLEDI…
Eurotiomycetes	Arthroderma_uncinatum_T10_GCA_030015485.1	SAT-KS-AT-PT-xCP	MPGPVENQSSTWDKCQTSAQARLLYFGNEFPNDDLNDLFRRLLQHSKDRRFRLLAAFLEESTLVIQDEIAKLPHQIKSQVPHFNNILTLSENGYLRELGLGAAMESALLIVLQIGLFIGHYEAIDAELTLSDGLTTLAGLSVGLFSGAAVALSTSLAEVVKNGAECLRVSFRLGVYVGDFSGKLEAPQPDGILQSWAHVITGMTEKSVQSELARVNEELGNPEISKVFISAADRSSVSVSGPPSRIKSAFLQSSDLRYAKSLPLPVYDGLCHATHLYSQEDVNAVLDISESLIPVSRPLQLPLISSQTGKPFTATTAGQLLLEIATELITGTIYLDNVTAGIIDHINAVGGSATCQIDTFRTSLVFKGILETIVASFPDMEISRNDMVEWVHKDFGTRR…
Eurotiomycetes	Arthroderma_uncinatum_T10_GCA_030015485.1	SAT-KS-AT-xCP-xCP	MHEACHDRNGSRQALSVLFGPQGTVTPKSMLEIRTLLQENPGLDFLSKTISDLPELWPAIVEVLPQLCKLPAKEKLAELCQFFQGGPVPTFTEPTNNLLLSPLGVISQTIDFWKLSHGLDNRLSIGSQLADVQGFCLGFLTATAISCSNNEAEFQMLASKAVRLALCTGALVDVESLNSSNGHDCSSTIAVRRKSPAQSQHLDNALKAYPRAYISCITDSKTVTVTIPESELAPFMADLAKQNLLSMPLPPRGRWHNRDNLEGLRAISTLCDRDERFRLPDADALNSALLSNITGETITKGALHNIALHSILTDQSRWDLMFDTFFSAMKTRNVDYRYINIGETVNVPRVANATSAAGREAPVNHHGENHGTHGGNHADAHVSSSTQQSIPKGLDLEDI…
Leotiomycetes	Articulospora_tetracladia_NNIBRFG329_GCA_003415645.1	SAT-KS-AT-PT-xCP-xCP-Te	MDVVLFGDQTVDPKQFLLKLLRRKGYPLLSSFFEQEPAKSTPFSNIAELVERYYEADQPDIGIESTLTCLAQLSHFIGYFEDFPLEYPEPAAHKFWVSAPDSSLRPQLGSRVAIIGEQLESRREKLQPWSTIVLGISQADAEAALADFNQSETQGLSHSNKLYISAIGAMSVTVSGAPSIRSKLMENSPAFSNLQHRDIPIRGPYHAEHLFGISDVDKIINPEIASELAKYPIIHSLTGLTSSQKPTASLELFQQAVLEILARQVQWDASVKTCVNAVRSSSVGGVRILPMGATALSNSLVSAFKVGGGLQIALVDGVSWFANNTIPRSVNGDLRNSKIAIIGMAGRFPNSADHEAFWQLLEQGLDVHREIPSDRFDAKAHLDPTGKGKNMTHTPYGCF…
Leotiomycetes	Articulospora_tetracladia_NNIBRFG329_GCA_003415645.1	SAT-KS-AT-PT-xCP-xCP-Te	MLSPASPAQVFVFGDQTSAFESDLRSLLHIKDNETLRSFFEKANYALRVEIARLPISQQALFPRFTSVLDLLHHYRVSGGNPALGLSLLTLNHLGRFIKYYGEDSRPYPSASNSYAIGLCTGSFAAAAISTSQTISELIPAALEAVLVAFRTGLASIEARDDIEHDSKDTAPVWSVILGLKEQEALSALKTYIVGKSGLPKVSQPFVSAVTSNSVTLSGPPSVLEDLLQTSRFASIKPLKLSVHAPYHASHIYDSAVVDTILSKSDANILSSYGSRIPLISCSTGRKVSANNYGSLLRTILHDILIEQLRWDLVLGGCYSEFVQTAPANAQFSLFPVLTNAAPTLAAALSQAAELQVPIDSAVNDNTSAQFAATPTGKPEQSKIAIVGHSGRFPDAAST…
Dothideomycetes	Ascochyta_koolunga_GRP_15_464_GCA_026547115.1	SAT-KS-AT-DH-xCP-MT	MTSQSGQFAPSVAFFCPQSKAPTEAYLEQLQKYIVHNPLLQPFAEAITSLRDTWTTLCECHADIAKLATGERHVVNLERWITEGIAGPVTSSMSGILALPLLVIIQICQYFQLLDLHNLTHDQMLSSLKNGGGAQGYCGGLPTAFAIACAKDEEEVVRLATKAVRLALAVGAFGDLGDDESVAGFTTIAVRLGAPNQGDELIRGYPECYISAITDPRTISIVGPVLALKKVADRARDQGLLVTDIYIRGKVHNPENTPLVKVLFDICQEHDEMKLPDASQLRVSVRSNIDGKLLKNCSLTHEAIKTILASRCEWYRLLKEVAQDLAGCSTDSHSFVLFGIGDPVPLMPFHNARLRVSKVEVHTAIQNAKLAEYEYPEKAIAVTGVSCRLPQANDLEELW…
Dothideomycetes	Ascochyta_koolunga_GRP_15_464_GCA_026547115.1	SAT-KS-AT-PT-xCP-Te	MATKVINKVLFFGDQTVEKLPGVRALAQKAQTTAVAARFLQAAADAIQSELGELPADERADVDDFDTILGLAEANAAREEPNETIATVLMAVVRMGELIIYVEEDPTILGTATVGAGGRAEVLGLCTGQVPAAVALAARNSSELFALAVEATRIAFRLGREICTNSRRIDPSGGPWATTLVGVQVAQVQGLLDEFHTQTQVPLARRICIGVEAHGWMTVFGPPSTQARLWAWSSELAKASRIPTEARGGVHMPTAPLIDTARVLGTSALLATPLDTDKARMHSTVDGALLQAATFGEMLLAVIPLIVHQPIRFNGTLDAVIQALAPGAPVRLVELGPSGHTPSVQRAISERGFAVTLATHAASPAAAAASPSAGLRGGSGAVAVVGMAGRFPGAGSAGV…
Dothideomycetes	Ascochyta_koolunga_GRP_15_464_GCA_026547115.1	SAT-KS-AT-PT-xCP-xCP-Te	MNVLIFGDQTADQFPLLKKVATWRNNATLTTFLDRASVVLREEVQKLPKTQRDQIPDFLTTWDLVNTYYSEGKKTPQLESCMVTLAQLAHYIGYYGENPTDLPNPANTRLVGLCTGSIAASVVASARSISELLPLATEAVRIAFRAGTCVGAAKDALEHPADAKESWSTIVAGISETAANKALSMFHDERRIPASARAYVSAVSVMALTISGPPSTTKRLFQEIDAFRNNTRVPIPVYAPYHAPHIHAQADIDRILDSEATRHLQQFRPLALIHSASSGRCQIATSTLELMRSALTEILLEPVRWDSLLSEVVSQVTATGSADCSVAAIGVTNVANSLASALKASGQSQTAVRDHTSWVQTTDATRGRTQNDKIAIVGMSGRFPGAASPEALWELLEKG…
Dothideomycetes	Ascochyta_koolunga_GRP_17_199_GCA_026119525.1	SAT-KS-AT-DH-xCP-A-xCP-C	MTSQSGQFAPSVAFFCPQSKAPTEAYLEQLQKYIVHNPLLQPFAEAITSLRDTWTTLCECHADIAKLATGERHVVNLERWITEGIAGPVTSSMSGILALPLLVIIQICQYFQLLDLHNLTHDQMLSSLKNGGGAQGYCGGLPTAFAIACAKDEEEVVRLATKAVRLALAVGAFGDLGDDESVAGFTTIAVRLGAPNQGDELIRGYPECYISAITDPRTISIVGPVLALKKVADRARDQGLLVTDIYIRGKVHNPENTPLVKVLFDICQEHDEMKLPDASQLRVSVRSNIDGKLLKNCSLTHEAIKTILASRCEWYRLLKEVAQDLAGCSTDSHSFVLFGIGDPVPLMPFHNARLRVSKVEVHTAIQNAKLAEYEYPEKAIAVTGVSCRLPQANDLEELW…
Dothideomycetes	Ascochyta_koolunga_GRP_17_199_GCA_026119525.1	SAT-KS-AT-PT-xCP-Te	MATKVINKVLFFGDQTVEKLPGVRALAQKAQTTAVAARFLQAAADAIQSELGELPADERADVDDFDTILGLAEANAAREEPNETIATVLMAVVRMGELIIYVEEDPTILGTATVGAGGRAEVLGLCTGQVPAAVALAARNSSELFALAVEATRIAFRLGREICTNSRRIDPSGGPWATTLVGVQVAQVQGLLDEFHTQTQVPLARRICIGVEAHGWMTVFGPPSTQARLWAWSSELAKASRIPTEARGGVHMPTAPLIDTARVLGTSALLATPLDTDKARMHSTVDGALLQAATFGEMLLAVIPLIVHQPIRFNGTLDAVIKPWRRVLPGAVAVVGMAGRFPGAGSAGVDGFWEVLHKGERHVTEIPSSRFDLDTYYDATGQKPGSTLARHGAFLDQPG…
Dothideomycetes	Ascochyta_koolunga_GRP_17_199_GCA_026119525.1	SAT-KS-AT-PT-xCP-xCP-Te	MNVLIFGDQTADQFPLLKKVATWRNNATLTTFLDRASVVLREEVQKLPKTQRDQIPDFLTTWDLVNTYYSEGKKTPQLESCMVTLAQLAHYIGYYGENPTDLPNPANTRLVGLCTGSIAASVVASARSISELLPLATEAVRIAFRAGTCVGAAKDALEHPADAKESWSTIVAGISETAANKALSMFHDERRIPASARAYVSAVSVMALTISGPPSTTKRLFQEIDAFRNNTRVPIPVYAPYHAPHIHAQADIDRILDSEATRHLQQFRPLALIHSASSGRCQIATSTLELMRSALTEILLEPVRWDSLLSEVVSQVTATGSADCSVAAIGVTNVANSLASALKASGQSQTAVRDHTSWVQTTDATRGRTQNDKIAIVGMSGRFPGAASPEALWELLEKG…
Dothideomycetes	Ascochyta_koolunga_GRP_17_199_GCA_026119525.1	SAT-KS-AT-xCP-Red	MSSPNLGINKRVVFLFGPLSLSISQSNLTTLRTTILSSSQYAWVEHVLTSLPSHYQLLVTEYPDLFNKTSQSQIDDLAAWLKTGDLVADTEHLLNSLLAPLIVIEQLVQYRAFLGSQDAIQEQPIVEETAGFCIGLLSAFAVSLSHQSTPTEFEQNAGVAVRLAMLAGAMVDRQHLQDSRGPSKTLSVAWKRLDSRDNRKDLESILARFPEAYISVAYDTTRVSLTTTVSALEPLQQTLQNAGFSVTELGLSGRFHSESDHHANFESIIEYCGRNPAFAFPPSALKIPTRTDGDNTTLKDQKSFHRTALQSILLQRCEWYNIVSDLKSSYLSSSTSFVSFGERCIPSSLLSGFAGRITHFDETTMQSIRVNENDVAVIGLSINVAGASSAPEFWDLLAS…
Dothideomycetes	Ascochyta_lentis_JD202.22_GCA_016097305.1	SAT-KS-AT-DH-xCP-xCP-MT	MLSQSTEFAPSVAFFCPQSRAPTEAYLKQLQDYIVQTPLLQPFAEAITSLTDTWTTLCVCHADIAKLTTGKRYVTSLERWITDGIAGPVSSSMSGILALPLLVVIQICQYFQLLDLHDLTHDQMLANLEAGGGAQGYCGGLPTAFAIACAKNEEEVVHLATKALRLALAIGAFGELGDDESVAGSTTIAVRLGAPHQGDELVKGHPGCYISAITDPRTISIVGPVLALKQVADKARDQGLLVTDIHIRGKVHNPENTPLVKVLFDICQKHDEMKLPDASQLRVPVRSNIDGKSLKDCSLTHEAIRTILASRCEWYQLLNEVAQDLAGCSTDSHSFVLFGIGDPVPLMPFHNARLRISKLDVYTAIQNAKLAEYEYPENAIAITGASCRLPQANDLEELW…
Dothideomycetes	Ascochyta_lentis_JD202.22_GCA_016097305.1	SAT-KS-AT-PT-xCP	MSTPTEETDCSADMRSMNIVYFSNEFPKEDLQDLLRRIHNHSRSRQHPLLAQFLDEATAVVKAEIQQLATELKQIIPPFTTLLSWAENTELRQGLLCGAIDGVLLVLVQLAAYIGYAEHADKAHLDLGDTSITGLGIGLLASTALALSPELGQLPLAGANAVRLAFRMGVHVTSVAEDLESRDLSEKPDTWAYVIHDVDPEAVQSQLDNANHRVPETAKIFLSAFSRTSVTVSGPPARLKALFSTTNFFRKSRFIELPVYGGLCHASHVYGPEDTQKIIQGESLLNSSRASYRPIAPIYSTSTGKPFSASTSEELYACVVSELLTKAICWDKVVRGVADQMEFAVLGEADVQLFGFGNSLPMNDLQTALRENASGIDVSMDNFISWIVQVTPSYSTPRG…
Dothideomycetes	Ascochyta_lentis_JD202.22_GCA_016097305.1	SAT-KS-AT-PT-xCP-Te	MSTNLSNPITVFLFGDQAYDFVPSLWELLKTNNNPILSAFLDQAHYVLRAQAITSLPLSLHKACRTTSLAQLLRKYVQGTLPASFTTPLFCLAQLGCFMRDYSACPYPAANSSFNLGVCGGALAATAISCSKSLSELLPVAVHTVLIAFRLGICITERRDQLEAAVFEKSRPWSVTISLNRQDTATAIKAVSTSLALPPPRRPWITTTAKSNTTVGGAPWVLERLLQEPHVACVRTKSIPVYIPAHNPDLFAVQDVEHILSPLRGSACMAAPFAIPFISSASGQLTAAESYGALIEVVLQQILLEPIRWDAVEDSVTHLLKAGRDASSVRIVPLNTNSAAILRSVLDPHFDSVQIDRSTPKDNSQRPDEQKRKIAIVSMSGRFPESPSTESFWDLLYKG…
Dothideomycetes	Ascochyta_lentis_JD202.22_GCA_016097305.1	SAT-KS-AT-PT-xCP-xCP-Te	MNVLIFGDQTADQFPLLKKVATWRNNATLTTFLDRASVVLRDEVQKLPKTQRDQIPDFLTTWDLVNTYYSEGKKIPQLESCMVTLAQLAHYIGYYGENPTDLPNPANTRLVGLCTGSIAASVVASARSISELLPLATEAVRIAFRTGTCVGAAKDALEHPADAKESWSTIVTGISESAAKKALSAFHDERRIPASARAYVSAVSVMALTISGPPSTTKRLFQEIDAFRNNTRVPIPVYAPYHASHLHSQADIDRILDSEATRHLQQFRPLALIHSASSGKCQTATSTLELMRNALTEILLEPVRWDSLLGEVVSQVTASGSADCSVAAIGVTNIANSLASALKAGGQSHTAVRDHTSWVQTTDATRGRTQNDKIAIVGMSGRFPGAASPEALWELLEKG…
Dothideomycetes	Ascochyta_lentis_JD202.22_GCA_016097305.1	SAT-KS-AT-PT-xCP-xCP-Te	MQLFLFGDQTYSIVDDLRHLLSCKNKPILQAFLEQAHYVIKAQMNLALPKAERKASRTSNLPHLLQKYADGELSPAFQVALHCLTQLGCFISHFEEPGQPYPTSDNSQIISLCTGAIAAAAISSSSSLSELLPAAVHSVQVAMRLGLCLIETRDRIELPERGTSQEWSVAFYGLDENAAVNAINDFFEREGLPESSRPWISATVGTATTISASPSVLTKMLNADSPLSQHKHRRIPIFVPSHSSRIFTPDHKDQILETTSFTNWMGFTSKVPVVSGATGSTAWAGGFVSLLDRAISECLLEPIRWDKVLKAFPETVRAEGTEFVTIIPIASNLGQNLARTLQEITAVTVKPINNPLSETKQATPIARSKLAIVGTSGRFPEAPNLESFWDLLYQGLDVC…
Dothideomycetes	Ascochyta_lentis_JD202.9_GCA_016097315.1	SAT-KS-AT-DH-xCP-xCP-MT	MLSQSTEFAPSVAFFCPQSRAPTEAYLKQLQDYIVQTPLLQPFAEAITSLTDTWTTLCVCHADIAKLTTGKRYVTSLERWITDGIAGPVSSSMSGILALPLLVVIQICQYFQLLDLHDLTHDQMLANLEAGGGAQGYCGGLPTAFAIACAKNEEEVVHLATKALRLALAIGAFGELGDDESVAGSTTIAVRLGAPHQGDELVKGHPGCYISAITDPRTISIVGPVLALKQVADKARDQGLLVTDIHIRGKVHNPENTPLVKVLFDICQKHDEMKLPDASQLRVPVRSNIDGKSLKDCSLTHEAIRTILASRCEWYQLLNEVAQDLAGCSTDSHSFVLFGIGDPVPLMPFHNARLRISKLDVYTAIQNAKLAEYEYPENAIAITGASCRLPQANDLEELW…
Dothideomycetes	Ascochyta_lentis_JD202.9_GCA_016097315.1	SAT-KS-AT-PT-xCP	MSTPTEETDCSADMRSMNIVYFSNEFPKEDLQDLLRRIHNHSRSRQHPLLAQFLDEATAVVKAEIQQLATELKQIIPPFTTLLSWAENTELRQGLLCGAIDGVLLVLVQLAAYIGYAEHADKAHLDLGDTSITGLGIGLLASTALALSPELGQLPLAGANAVRLAFRMGVHVTSVAEDLESRDLSEKPDTWAYVIHDVDPEAVQSQLDNANHRVPETAKIFLSAFSRTSVTVSGPPARLKALFSTTNFFRKSRFIELPVYGGLCHASHVYGPEDTQKIIQGESLLNSSRASYRPIAPIYSTSTGKPFSASTSEELYACVVSELLTKAICWDKVVRGVADQMEFAVLGEADVQLFGFGNSLPMNDLQTALRENASGIDVSMDNFISWIVQVTPSYSTPRG…
Dothideomycetes	Ascochyta_lentis_JD202.9_GCA_016097315.1	SAT-KS-AT-PT-xCP-Te	MSTNLSNPITVFLFGDQAYDFVPSLWELLKTNNNPILSAFLDQAHYVLRAQAITSLPLSLHKACRTTSLAQLLRKYVQGTLPASFTTPLFCLAQLGCFMRDYSACPYPAANSSFNLGVCGGALAATAISCSKSLSELLPVAVHTVLIAFRLGICITERRDQLEAAVFEKSRPWSVTISLNRQDTATAIKAVSTSLALPPPRRPWITTTAKSNTTVGGAPWVLERLLQEPHVACVRTKSIPVYIPAHNPDLFAVQDVEHILSPLRGSACMAAPFAIPFISSASGQLTAAESYGALIEVVLQQILLEPIRWDAVEDSVTHLLKAGRDASSVRIVPLNTNSAAILRSVLDPHFDSVQIDRSTPKDNSQRPDEQKRKIAIVSMSGRFPESPSTESFWDLLYKG…
Dothideomycetes	Ascochyta_lentis_JD202.9_GCA_016097315.1	SAT-KS-AT-PT-xCP-xCP-Te	MNVLIFGDQTADQFPLLKKVATWRNNATLTTFLDRASVVLRDEVQKLPKTQRDQIPDFLTTWDLVNTYYSEGKKIPQLESCMVTLAQLAHYIGYYGENPTDLPNPANTRLVGLCTGSIAASVVASARSISELLPLATEAVRIAFRTGTCVGAAKDALEHPADAKESWSTIVTGISESAAKKALSAFHDERRIPASARAYVSAVSVMALTISGPPSTTKRLFQEIDAFRNNTRVPIPVYAPYHASHLHSQADIDRILDSEATRHLQQFRPLALIHSASSGKCQTATSTLELMRNALTEILLEPVRWDSLLGEVVSQVTASGSADCSVAAIGVTNIANSLASALKAGGQSHTAVRDHTSWVQTTDATRGRTQNDKIAIVGMSGRFPGAASPEALWELLEKG…
Dothideomycetes	Ascochyta_lentis_JD202.9_GCA_016097315.1	SAT-KS-AT-PT-xCP-xCP-Te	MQLFLFGDQTYSIVDDLRHLLSCKNKPILQAFLEQAHYVIKAQMNLALPKAERKASRTSNLPHLLQKYADGELSPAFQVALHCLTQLGCFISHFEEPGQPYPTSDNSQIISLCTGAIAAAAISSSSSLSELLPAAVHSVQVAMRLGLCLIETRDRIELPERGTSQEWSVAFYGLDENAAVNAINDFFEREGLPESSRPWISATVGTATTISASPSVLTKMLNADSPLSQHKHRRIPIFVPSHSSRIFTPDHKDQILETTSFTNWMGFTSKVPVVSGATGSTAWAGGFVSLLDRAISECLLEPIRWDKVLKAFPETVRAEGTEFVTIIPIASNLGQNLARTLQEITAVTVEAGHSWHVWSLPEAPNLESFWDLLYQGLDVCKETPIRRWDNATHVDPTGK…
Dothideomycetes	Ascochyta_pisi_HNA23_GCA_039634435.1	SAT-KS-AT-DH-xCP-xCP-MT	MLSQSTQFAPSVAFFCPQSRAPTEAYLKQLQDYIVQTPLLQPFAEAITSLTDTWTTLCVCHADIAKLTTGKRHVTSLERWITDGIAGPVSSSMSGILALPLLVVIQICQYFQLLDLHDLTHDQMLANLEAGGGAQGYCGGLPTAFAIACAKNEEEVVHLATKALRLALAIGAFGELGDDESVAGSTTIAVRLGALHQGDELVKGHPGCYISAITDPRTISIVGPVLALKQVAEKARDQGLLVTDIHIRGKVHNPENTPLVKVLFDICQKHDEMKLPDASQLRVPVRSNIDGKSLKNCSLTHEAIRTILASRCEWYQLLNEVAQELAGCSTDSHSFVLFGIGDPVPLMPFHNARLRISKLDVYTAIQNAKLAEYEYPENAIAITGASCRLPQANDLEELW…
Dothideomycetes	Ascochyta_pisi_HNA23_GCA_039634435.1	SAT-KS-AT-PT-xCP	MSTPTEETDCSADMRSMKIVYFSNEFPKEDLQDLLRRIHNHSRSRQHPLLAQFLDEATAVVKAEIQQLPTELKQIIPPFTTLLSWAENTELRQGLLCGAIDGVLLVLVQLAAYIGYAEHADKAHLDLGDTSITGLGIGLLASTALALSPELGQLPLAGANAVRLAFRMGVHVTSVAEDLESRDLSEKPDTWAYVIHDVDPEAVQSQLDITNHLVPETAKIFLSAFSRTSVTVSGPPARLKALFNTTNFFRKSRFIELPVYGGLCHASHVYGPEDTQKIIQGESLLNSSRASYRPIAPIYSTSTGKPFSASTSEELYACVISELLTKAICWDKVVRGVADQMEFAVLGEADVQLFGFGNSLPMNDLQTALRENASGIDVSMDNFISWIVQVTPSYSTPRG…
Dothideomycetes	Ascochyta_pisi_HNA23_GCA_039634435.1	SAT-KS-AT-PT-xCP-xCP-Te	MNVLIFGDQTADQFPLLKKVATWRNNATLTTFLDRASVVLRDEVQKLPKTQRDQIPDFLTTWDLVNTYYSEGKKIPQLESCMVTLAQLAHYIGYYGENPTDLPNPANTRLVGLCTGSIAASVVASARSISELLPLATEAVRIAFRAGTCVGAAKDALEHPADAKESWSTIVTGISESAAKKALSAFHDERRIPASARAYVSAVSVMALTISGPPSTTKRLFQEIDAFRNNTRVPIPVYAPYHASHLHSQADIDRILDSEATRHLQQFRPLALIHSASSGKCQTATSTLELMRNALTEILLEPVRWDSLLGEVVSQVTATGSADCSVAAIGVTNIANSLASALKAGGQSHTAVRDHTSWVQTTDATRGRTQNDKIAIVGMSGRFPGAASPEALWELLEKG…
Dothideomycetes	Ascochyta_rabiei_na_GCA_004011695.2	SAT-KS-AT-PT-xCP-xCP-Red	MTGHLTLYLFGDQTFDAISHFESLMKARDDPVLDHLLTKAYSAIRTEMYRLSPQVRKEFPQYNGIEDLVRIHQAGKRLLPLDMALTSLYQLGTFIIRVDPIEFVADRACTLGLCTGALAAAAVSCSHSALDLIPFAVQAIIVAFRVGVLVEDCAVHVARPRNKEESWSTVCPRSTVVDVLNQFCMETTLPKFAQPYISAYLPSSITVSGPPRSLEIFVSSKLYAGFKHESIPIHGPYHAPHLYSDQDVEQVMRCVASDSTMLRPSQLPALSSGGSRPDGKDFATLLKAAVTDILRHPFQLSGTVEELETCITQFSSRSFNIVSIGSTADHMIYSALSQTSLETITLRGREHVKTPILDDRVAYNLKKPKLAITGMSGRYPGAKNNEEFWDLLYRGLDVH…
Dothideomycetes	Ascochyta_rabiei_na_GCA_004011695.2	SAT-KS-AT-PT-xCP-xCP-Te	MNVLIFGDQTADQFPLLKKVATWRNNATLTTFLDRASVVLRDEVQKLPKTQRDQIPDFLTTWDLVNTYYSEGKKIPQLESCMVTLAQLAHYIGYYGENPTDLPNPANTRLVGLCTGSIAASVVASARSISELLPLATEAVRIAFRVGTCVGAAKDALEHPADAKESWSTIVTGISESAAKKALSAFHDERRIPASARAYVSAVSVMALTISGPPSTTKRVFQEIDAFRNNTRVPIPVYAPYHASHVHAQADVDRILDSEATRHLQQFRPLALIHSASSGKCQTATSTLELMRNALTDILLEPVRWDSLLGGVVSQVTATGSADCSLVAIGVTNIANSLASALKAGGQSHTAVRDHTSWVQTTDATRGRTQNDKIAIVGMSGRFPGAASPEALWELLEKG…
Dothideomycetes	Ascochyta_rabiei_na_GCA_011037155.1	SAT-KS-AT-PT-xCP-xCP-Red	MTGHLTLYLFGDQTFDAISHFESLMKARDDPVLDHLLTKAYSAIRTEMYRLSPQVRKEFPQYNGIEDLVRIHQAGKRLLPLDMALTSLYQLGTFIIRVDPIEFVADRACTLGLCTGALAAAAVSCSHSALDLIPFAVQAIIVAFRVGVLVEDCAVHVARPRNKEESWSTVCPRSTVVDVLNQFCMETTLPKFAQPYISAYLPSSITVSGPPRSLEIFVSSKLYAGFKHESIPIHGPYHAPHLYSDQDVEQVMRCVASDSTMLRPSQLPALSSGGSRPDGKDFATLLKAAVTDILRHPFQLSGTVEELETCITQFSSRSFNIVSIGSTADHMIYSALSQTSLETITLRGREHVKTPILDDRVAYNLKKPKLAITGMSGRYPGAKNNEEFWDLLYRGLDVH…
Dothideomycetes	Ascochyta_rabiei_na_GCA_011037155.1	SAT-KS-AT-PT-xCP-xCP-Te	MNVLIFGDQTADQFPLLKKVATWRNNATLTTFLDRASVVLRDEVQKLPKTQRDQIPDFLTTWDLVNTYYSEGKKIPQLESCMVTLAQLAHYIGYYGENPTDLPNPANTRLVGLCTGSIAASVVASARSISELLPLATEAVRIAFRVGTCVGAAKDALEHPADAKESWSTIVTGISESAAKKALSAFHDERRIPASARAYVSAVSVMALTISGPPSTTKRVFQEIDAFRNNTRVPIPVYAPYHASHVHAQADVDRILDSEATRHLQQFRPLALIHSASSGKCQTATSTLELMRNALTDILLEPVRWDSLLGGVVSQVTATGSADCSLVAIGVTNIANSLASALKAGGQSHTAVRDHTSWVQTTDATRGRTQNDKIAIVGMSGRFPGAASPEALWELLEKG…
Pezizomycetes	Ascodesmis_sphaerospora_NRRL_22422_GCA_027569015.1	SAT-KS-AT-PT-xCP-xCP-Red	MTDNLKLYLFGDQTFDIKPHLQKLLQRQDHLFLQDFLTKAYNAIRVEMYRLPLKVRNDLPRFTCQEDLLRWDESGKRCIALDMAMTTLYHLGTFISQAGISSYDAQSSRVVGLCTGAFAAAAISCSSFTADLIPMAVYSVIAAFRTGMLVTDVAKRVDQSQDLDQSWALLVPGSKSAAAVEKFCEESNLPLTSRPYISAYAPNGITVSGPPKTLAQLISSPSFKGLTSKSIPIFGAYHAPHLYSQMDAKKIVSSLSYNAANALSEQIPLLSSTGVKLDERSFATLLEDAVAQALVHPLHWSSILGDIQACLQDVNPGQFNVVPIGSTADHLIYTALKQTPLRSLVPSTHGQSRQSVPEAGLESTSKKPKLAIVAMSGRFPGAKDNEAYWDLLFQGLDVH…
Pezizomycetes	Ascodesmis_sphaerospora_NRRL_22422_GCA_027569015.1	SAT-KS-AT-PT-xCP-xCP-Te	MKHCKILLFGDLSVPFEGQLQALLHVHDNPLLTSFFEQSGAKIRDEIGLLTTQQQSLFPRFTTLIDLVSKLGETEGTPVLRFCLLPVCQIGQFINYYGRNGRQYPSTDEAYCLGICAGAFSAAAVGSSSSLSELVNTASETVIIAFRTALHSFSIKNDTVGNNEGHGRSWSVIIPGEEKEVQEKLDRWGKSENLHELWRPYISATALNNITLSGPPRVLQGFITSQQLKSHELPIHSPYHAPHLFDESSLREITKDMSCNDLSFFPLISASTGELAATDGHRSTITAVIKDTLINQVKWNSILEGTIQRLQKSGCESCSILPFSSNASQLLSTALSRANLNVEVEQVPQVTKSHSNHGHFSDSKIAIIGYSGRFPDSASNEAFWELLRAGKDVHREVPE…
Eurotiomycetes	Ascosphaera_apis_ARSEF_7405_ARSEF_7405_GCA_001636715.1	SAT-KS-AT-PT-xCP-xCP-Te	MGNHNLVLFDVADKDVLQPLRRLIRNEDYPILQAFFTRTGEALRFEVGRQPKAVRDQIPYFTTIIDLVEGSARKQSVLLGHAFECLYQIGTVLANEWLQWSEEGPLRIAAYGTGCLAASALAVSETPSQLAEVGSIFTVLCFRLAVHEQNVRKMLAKGTGKATLPPVASDVEQLLNNPTPFPLLSRRPQLVPILNSNELIFDFNDAEELANEVVFRLLEPKGSLESTFEAISDMSLTSEIDLFHFYQGKAAEDVCKRFSDCVPIRSVVPLFSEDVVPPQKMPSVPAENQIAIIGFSGRFPSAKDPEALWEILQSGKDVHKRIPLDRFNVETHYDPTGKRPNTMTTPYGCFIDEPGLFDNQFFSVSPREALQMDPVQRLALITAFEALQMAGVVPGRTPS…
Eurotiomycetes	Aspergillus_aculeatinus_CBS_121060_CBS_121060_GCA_003184765.1	SAT-KS-AT-PT-xCP	MVTYTPPAEAQDLPTKLKVLYFSNEFPTDDLSTLLRRLHSHSKHSSHPILARFLSEATRVLRNEVSQLRVELGQLVPAFESVTTLAGETKLRKGPLAQSIDGVLLCVLQLGIYIGHCELYPEDRATETNSLLTGLGVGILVSTAVSVSTSLDDAVTAGVEVLRIAFRLGVFVADVSHNLEAVDAESAESWAYVVHGMTVDEAQTELDDIQAKERTPSASKIFVSAISETSVTVSGPPARLKALFRNYASFRDRKFAHLPVHGGLCHAAHLYTREDAQAVVRSPSLPARYKPVVPVMSTSSGQPFLASSAAELFEQVIFEVLTKQIVWDNVIRGVAERVAKTDVHDVNIKVFRHSLPAQQLSSALTSAITDLPVDTDDLLAWVGSDVDHGQYSPGSSMQS…
Eurotiomycetes	Aspergillus_aculeatinus_CBS_121060_CBS_121060_GCA_003184765.1	SAT-KS-AT-PT-xCP-xCP-Te	MEGPYRVYLFGDQTSDFETGLRRLIQAKNNTIVQSFFQQSFYALRQEISKLPPAQRKIFPRCTSLIDLLARYRESGPSPVLESAFTCIYQLGSFINYYGDLGNAYPSQGCQLVGLCTGLLSCAAVSASRNVGELLPAAVETVLVALRLGLCVLRVRELVDSEASASPWSVLVSGLGEESASTLIEEYSIKTAIPPSSRPYISAVGSNGVTISAPPLVLDAFIENGLAGNYKHTRVLIHGPYHAPHLYDSRDVDRILESFPEERLGHYTTHIPVLSSNTGTPIGASKIKEVLQVAIEEILLRRLCWDKVTESCISIVESANSQSCQLTPISTSATQSLHTAFKKAGVANISLETGIGDVSATDKPNLSGKTECSKIAIIGMSGRFPDSESPEAFWEILQK…
Eurotiomycetes	Aspergillus_aculeatinus_CBS_121060_CBS_121060_GCA_003184765.1	SAT-KS-AT-PT-xCP-xCP-Te	MSAKLQAQASKEAAFSAFFKRQLFHSIPTVSTDLHGQVAIVTGANVGLGLACARQLLALQLSRLILAVRSQPKGETAARELRAAFPAAHVEVWPLDMASYASIQAFVTRCRTELARVDIAILNAGLALKRYQPITTNHPGPARETTLQVNFLSTALLALLLLPSLRRVAPAPAEKPGPGTALRASAPGRLTLVGSDTAYWLDAAGLLRGHASLLAAANSPTGFDGLERYKLTKLFVLMFVAKLARDVVAADEVVVNVACPGLCKGTAFVREPDDNRAKHAVVSGLIRLIGRTPELGARVYLDAALAQGPLSHGSMLSEGRILPFPPIMYKEPDLMDRLWNEIMEEFEAAGLGRELAEIVSLCSMEPRSRHILVVGDQSVDPTPFLVHALVKKPTPLLQA…
Eurotiomycetes	Aspergillus_aculeatinus_CBS_121060_CBS_121060_GCA_003184765.1	SAT-KS-AT-xCP-MT-Red	MSDSKPAVLLFGSLSLSFDEKAFQQLQRTIIADGRHHWAWETLTCLPHSYQTIVAAVPALESASTLQHLHDLKKAVQRQQPLTIPFPLPNSALIPLVVVFQLTQYADMVEDAAIDLDPRIDLFAASIHGQETLGFCTGLLSAITVSSARNKEQFCHFAAVAARLGLLVGMVVDACDAASMGPSRSLIAAWSSEKKQNELHQILQDFPKAYLSVYYDEDRATVTTAASTLSPLLEQCRAAGILAAEVGLYGRFHSDAHSNLLPAILELCDAHPSFQFPDASELVIPTRSNAGGAFIHQGFLHRHALQQILIDPPQWFAAVDTVRKSRLQEDDAHVVSFGTERCIPPSLMRTAASYTYSGNDIAVVGMACKTAGADNLEEFWDLLCAGESQHKEVPQERFG…
Eurotiomycetes	Aspergillus_aculeatus_na_GCA_039111445.1	SAT-KS-AT-PT-xCP	MVTYTPPAEAQDLPTKLKVLYFSNEFPTDDLSALLRRLHSHSKHSSHPILARFLSEATRVLRNEVSQLRVELGQLVPAFESVTTLAGETKLRKGPLAQSIDGVLLCVLQLGTYIGHCELYPEDRATETNSLLTGLGVGILVSTAVSVSTSLDDAVTAGVEVLRIAFRLGVYVADVSHNLEAVDAESSESWAYVVHGMTVDEAQAELDDLQAKERTPSASKIFVSAISETSVTVSGPPARLKALFRNYASFRDRKFAHLPVYGGLCHAAHLYTREDAQAVVRSPSLPARYKPVVPVMSTSSGRPFLASSAAELFEQVIFEVLTKQIVWDNVLRGVAERVAKTDVHDVNIKVFRHSLPAQQLSTALTSAMTDLPVDTDDLLAWVGADVDHGQYSPGSSMQS…
Eurotiomycetes	Aspergillus_aculeatus_na_GCA_039111445.1	SAT-KS-AT-PT-xCP-xCP-Te	MEPTSVVISGSTTQILLVKNTRLLTMEGPYRVYLFGDQTSDFESGLRRLIQAKNNTIVQSFFQQSFYALRQEISKLPPAQRKIFPRCTSLIDLLARYRESGPSPVLESAFTCIYQLGSFINYYGDLGNAYPSEGCQLVGLCTGLLSCAAVSASRNVGELLPAAVEAVLVALRLGLCVLRVRELVDSEASASPWSVLVSGLGEESASSLIEEYSIRTAIPPSSRPYISAVGSNGVTVSAPPLVLDAFIENGLAGKYKYTRVLIHGPYHAPHLYDSRDVDRILESFPEERLGHCTTHIPVLSSNTGTPIGASKIKEVLQVAIEEILLRRLCWDKVTESCISIVESANTQSCQLIPISTSATQSLHTAIKKAGVANISLETGIGDVSTTEKPNLSGKTECSK…
Eurotiomycetes	Aspergillus_aculeatus_na_GCA_039111445.1	SAT-KS-AT-PT-xCP-xCP-Te	MSAKLQAQASKEAAFSAFFKRQLLHSIPTVSTDLHGQVAIVTGANVGLGLACARQLLALQLSRLILAVRSQPKGEAAARELRAAFPAAHVEVWPLDMASYASIQAFVTRCRTELARVDIAILNAGLALKRYQPITANNPAPARETTLQVNFLSTALLALLLLPSLRRVAPAAAEKPGPGTALRASAPGRLTLVGSDTAYWLDAAGLLRGHASLLAAANSPTGFDGLERYKLTKLFVLMFVAKLARDVVAADEVVVNVACPGLCKGTAFVREPDDNRAKHAVVSGLIRLIGRTPELGARVYLDAALAQGPSSHGSMLSEGRILPFPPIMYKEADLMDCLWNEIMEEFEAAGLAMEPRSRNILVVGDQSVEPTPFLVHALVKKPTPLLQAFLRDVQPLLRR…
Eurotiomycetes	Aspergillus_aculeatus_na_GCA_039111485.1	SAT-KS-AT-DH-xCP	MTISVGVFCPQSRAPSASYLQSIRQFILTHPILQCLVTEIVTLKEVQTLLAMKNAAINRLPRALQYTDHLIQWLVAGDGDAAASTQSGIVALPRLLILQVAQYFQYLESQQITHADVIAQVRTAGGLQGYCGGLPAALALSCAASETEVGPLICTAIRLAYANGLYAELGDDSTVPGATTIVVRLKSEGQAEDLVRHCRHTYISAITDPRSVSLVGPVDELAALQERASDLGLLVQAMDLRGKTHDPENMDLARDLVAVCRESEMLQLPGPEHLKSPVRSNRTGDFITGRGSLSEEIVQTVLASRCEWYQLLCNVARGLQETGTPTHQIVSFGVGDVVPLMPFNKLGLRIEKQDWGAPKRRLGPEKLPSYPDDAIAIVGASCRLPGANTMEELWGVLSE…
Eurotiomycetes	Aspergillus_aculeatus_na_GCA_039111485.1	SAT-KS-AT-PT-xCP	MVTYTPPAEAQDLPNKLKVLYFSNEFPTDDLSTLLRRLHSHSKHSSHPILARFLSEATRVLRNEVSQLRVELGQLVPAFESVTTLAGETKLRKGPLAQSIDGVLLCVLQLGMYIGHCELYPEDRATETNSLLTGLGVGILVSTAVSVSTSLDDAVMAGVEVLRIAFRLGVFVADVSHNLEAVDAESSESWAYVVHGMTVDEAQTELDDIQAKERTPSASKIFVSAISETSVTVSGPPSRLKALFRNYASFRDRKFAHLPVYGGLCHAAHLYTREDAQAVVRSPSLPARYKPVVPVMSTSSGQPFLASSAAELFEQVIFEVLTKQIVWDNVIRGVAERVAKTDVHDVNIKVFRHSLPAQQLSTALTSAMTDLPVDSDDLLAWVGTDVDHGQYSPGSSMQS…
Eurotiomycetes	Aspergillus_aculeatus_na_GCA_039111485.1	SAT-KS-AT-PT-xCP-xCP	MATGFAGITNTGHRGGLWTAVRRGLRDTHAPHKLGGRRRDNQGANDVGDGSEHTLLLSTGNWNLPNNRPHREGGTAAAAGRGPWMSFGALQPWSQALDNLPPPQQALDNNSLNYITTIQKDACQHKAQSNGSCSLQLSHSSFLCSIMAHHDSVSLVHFGDQTANLDSSLRALLRSAKRLPDLDQFLRRSTEVLQTGVRTLPVTSQAEWACRTLGDFLLAVEASVDEHRPAIVTVLLTICQLGYLYVYLEQQLPDFLQSAKRIMVGLFVQGSWAVSVSGVTEEQLRGALQQFNETCTASPMLQPYISVIANSSFTVAGPPSALQGFADFMHNYMPRARIISIPIFAAYHSSLIYPTIPDSIIGNSSLLDQPRNPKSSLISTHTGLTVHDALTLRDYLHIA…
Eurotiomycetes	Aspergillus_aculeatus_na_GCA_039111485.1	SAT-KS-AT-PT-xCP-xCP-Te	MEPRSRDILVVGDQSVDPNPFLVHALVKKPTPLLQAFLRDVQPLLRREIEGLPYGTRSLIPAFASLHELVEQYQRQGVHLASLDSALTCLAQFTHFIGVCEENPRAYLQPGTLIIGTCTGLLAASAIASSDSLIALIPLAVETVRLAFRLGATAARKAESLEASQTPWTSLVTGVDSTTVSVAVEEFNQTQGLRSSHRVYVSSVATNSVAVSGPPSLRARLFEASPLLQGVHHRTLPIHAPYHAPHLFAAESDILDAASIDILNRYHQIHTVCGFNASSTRSTSALFTECIDRILRECMDWNQLVTASLNSLAPLNAPSYRILSLGPTPLGNALASALKHEQPAGLKLTLEDHASWLAANSVPAYLSSSPAGCNIAIIGMAGRFPDAADHEAFWELLAQ…
Eurotiomycetes	Aspergillus_aculeatus_na_GCA_039111485.1	SAT-KS-AT-PT-xCP-xCP-Te	MEGPYRVYLFGDQTSDFETGLRRLIQAKNNTIVQSFFQQSFYALRQEISKLPPAQRKIFPRCTSLIDLLARYRESGPSPVLESAFTCIYQLGSFINYYGDLGNAYPPEGCQLVGLCTGLLSCAAVSASRNVGELLPAAVEAVLVALRLGLCVLRVRELVDSEASASSWSVLVSGLGEESASSLIEEYSIKTAIPPSSRPYISAVGSNGVTISAPPLVLDAFIENGLAGNYKHTRVLIHGPYHAPHLYDSRDVDRILESFPEERLGHYTTHIPVLSSNTGTPIGASKIKEVLQVAIEEILLRRLCWDKVTESCISIVESANSQSCQLIPISTSATQSLHTAFKKAGVANISLETGIGDVSTTDKPNLSGKTECSKIAIIGMSGRFPDSESPEAFWEILQK…
Eurotiomycetes	Aspergillus_amoenus_S2904_GCA_023624915.1	SAT-KS-AT-PT-xCP	MKLLYFSNEFPKDDLQGLFRRLYNHSKDRRHPILARFIDEATLAVRDEVRQLPTSVKSLVPAFETVLNLADYPELRKGPLSGSLDGVLLCVLEIATLIGYYENTPDRFDLHNVSTYLAGLGLGLLSTAAVSLCSTLADLPVTGAEVVRVSFRLGTLVDEISQNLEPRDTSGSPDTWASVVPGAKVEDVQAELDAIHARENTPQPSKIFISAWGEGSVTISGPPSRIKRVLRLSEFFRRHKVVSLPVYSGLCHAKHLYNEQHARAIISTKTIDSIDTVYSPTVPIYQTSTGKHFTCSSAKELFEKLVLELLTQPILWDNVIQGVVDQAYTISATNCEVLVFRISVPINDLRTALSSKLQGFEASTEELIPWILEKPNNESPRGTKQSKIAIIGMSCRMPG…
Eurotiomycetes	Aspergillus_amoenus_S2904_GCA_023624915.1	SAT-KS-AT-PT-xCP	MKENTHSTSLVFFGNEFPNDDLKGLFRCLLRLSRDRRFRQLAAFLEESTLVLKKEVAALPQQLRDLVPHFHTILPLAELGDFRQGPLGAAMESAILTVLELGMFIGHYEAEGRGWDLFPHNTIIAGLSIGLLAAAGLALSTNLAEVAQNGAECVRVSFRLGVYVSEISRKLEAPQADGTLLSWAHVVTGETKSAIQDELTQYNSESGTPELLKVFISAADKTSVSSFALPVYDGLCHASHLYNEDSINTVINSAESLIPTSLPVRLSLHSSNTGQPFLATTAHELFQAIGTELLTGTIYLDNITEGILERIGNFSPSQCRIETFRTSIVFKSILAAVKAQFPSLEIKLVDLIPWSLRDYGTLQPRSFAHSKLAIVGMACRMPGGGNDTELFWEILEQGR…
Eurotiomycetes	Aspergillus_amoenus_S2904_GCA_023624915.1	SAT-KS-AT-PT-xCP	MDPRHARLVFFGNEVPSDGAKDLFRRLRQHSKDRRFRLLSIFLEESTAILKEEAAKLPKQLQELIPHFDTACSLADVDFRQGPLGAAMESALLTILELALFIGYYEAEDSEWDLDPSQTILAGLSIGILAGAAVSLSSNVADVAKVGPESVRVSFRLGVYVAGISSKLEAPQSDGTLQSWAHVITEMTQDAVQHELSQFNEGVHNPELTKVFISAADSTSVSVSGPPSRVKAAIQYSPVLRYSKQLPLPVYDGLCHASHLYSKNDIESVINSTDSVISNSRPVRLPLISSQTGAPFKARTARELFLEIGTELLTGTIYLDKVTAGIVEHAKLHSEMGSYGIDTFRTSLVLQGIHSAIAASLSQLSLSRNDLVSWVQKEYGAHRPSSYADSKLAIVGMAC…
Eurotiomycetes	Aspergillus_amoenus_S2904_GCA_023624915.1	SAT-KS-AT-PT-xCP-xCP-Te	MLTIGSYHGDLGHAYPSNASTQLVGLCTGLLSCAAVSSASNIGELLAPAVEVVVVALRLGLCVRRVRELVDQEMAAPLSWSALVSGINEADGMDLISDFNIQKAIPPSSRPYISAVCANTLTISGPPAVLNQFLDTTISKQNKAIRVPIHGPYHASHLYDDRDVGRILEHCDTDLVCNRQPHIPVVSSNNGELITAESMRDFLKIALEEILLRQMCWDKVTDSCAAILNSVNERTSKKLLPISTSAIQSLFNSLKKENVSNIDVDGSVTDITSPGPANNHTGRAELSKIAIIGMSGRFPDSDSPQDFWNLLYKGLDVHRKVPEDRWDADAHVDLSGTGRNTSKVQYGCWIREPGLFDPRFFNMSPREALQADPAQRLALLTAYEALEGAGFVADSTPST…
Eurotiomycetes	Aspergillus_amoenus_S2904_GCA_023624915.1	SAT-KS-AT-PT-xCP-xCP-Te	MSPTHVLLFPHERATLAAVHDLNVRSKSRRRLQALLTDASTVVQRHTASLDGLERASIGPFEDLVELAERHATHKGSIVADLVVLTTVQIGQLLVLAEDQPAILSENRVPLAFGAGLLAAGVALAASTVDEIVTLGLEAVSTAFRLGLALQRRAKDIEDSDEPWARVVSSAISVAELEQTLERFNASISPMNRVYIGQALTESNVVFGPPSTLDAFAKASEIASAINSTPVLDKAPMHGSHLPAIDATSILTDSVNGRASELWKLAVDQVAHQRIHIEETVAGLVNDLQANTTIILTSIGSETSNITSLLEKSSFIVQTSQLSPPPKPYGDSLNTIPADSIAVVGMSGRFPDSDTLDEFWKLLENAQTTHQVIPESRFNVDDFYDPTRAKHNALLARYG…
Eurotiomycetes	Aspergillus_amoenus_S2904_GCA_023624915.1	SAT-KS-AT-PT-xCP-xCP-Te	MMASQGDSTRLFLFGDKTYDFVPELRGLLAIRNNPILVAFLEQSHYVIRAQMIQTLTPKEHKQARTASLAEVLQKYVDGKLPSAFQTALSCITQLGFFMRQFDDPAIPYPRFNDSYVLGVCTGSLAASAISCSTSLSELLPIAVQTVIVSFRLGLCAQEVRDRLEISDVNYTKPWSVVSDTSPDEVAIAIDRLSNQKALPKARQPWITATSTKATTVSGSPDILADLATQPRLKDSKRWMGIPIYVPAHNPHLFSSKDVDNILETTNESYWGTYGSKIPFLSSVTGKLVWVRNYRDLLHLALKQCLIEPIRWELVEAELPRLLKARGGVDTVSIVPLATTLTKSLSAALTSEGVTVGEAHSTSAKIPERYSHRPESDRSKLAIVSMSGRFPEAPSTDSF…
Eurotiomycetes	Aspergillus_amoenus_S2904_GCA_023624915.1	SAT-KS-AT-xCP-xCP-MT-Red	MAPYTVLLFGPQALSFDDKSFAEIGDAVRNDPYNQWVIDIVLQLPDTWATFVQRFPRLDVIKGRQSLEELIGWLSSGEVSPITRTLPNVLLSPLVVISQLTQFTQYLRIVHPDSGSSEDIYSNIGQETETVGFCTGLLSALAVATATSKAQFEQNAATAVRLATLIGAFVDAQDTSNAHKASISLATAWNSVGAKQEMTRILNEFPEAYVSVLYDKNRATVTTAASSSKSLQDKLRAAGVVATEMNLVGRFHSDCYNDDIQQILKFCDANSTLQFPDASRLVTAIRSNDGGLVTGGKLHHSALKSILVEQSYWYETFEAVHASRLGDKQTTVVGFGPERCVPPSLLRSVNDQVVYMINPESAKARLLQGTSKTKSSLKYPQGYSDNDIAVVGYSLKVAN…
Eurotiomycetes	Aspergillus_austwickii_LH_A515_GCA_037043805.1	KR-KS-AT-xCP-xCP-MT-Te	MTINEMIHRLDWTSAELSTEPLNFRKVVFLAADEDSRERLSRYQAQLAGEGLTTVFIGHATEITPLLTPDTIVVHIPHVAREKSGVYEAVTKSCTSLIAAAQVLYHHNQDSRDRTSMLFSLISRDSGTDGLEYAPLYGLARVMKTEMADGFGGLFDEDQGHFPLSAFKYAQGFDVVRICQGVPQTASLQPFQDQLNNPMQLQLRENSTYLVTGGTRGIGLEIATWLGERGARNLLLVSRGGLTPALGRNAKNADHEKLVSRIAKLKDMGISVHVLSIDFGKPKAETLLRQAIDELNIPRIKGVVHAAGVAGFHTLQHCSPSDVADVLTPKVRGSLALDTLFPPGTLDFFFFMSSIGQLIGFPGQLSYAPANGFMDGLAAHRRRHGDNSMSILWTAWRGV…
Eurotiomycetes	Aspergillus_austwickii_LH_A515_GCA_037043805.1	SAT-KS-AT-PT-xCP	MRIFHFSNKFPPDDLADLFRRLRLHSKCPNHVILARVLEEVTDVVREEVAELPAELRSLLPPFQSILDLAESFNWHQGPLSGTFECVFLVLMPVCLFVGHYESRPDEFVFRRDTSLFTGLGLGFLAATAIVASPSLCSVPVTVAEVVRMAMRTGLLIYQRSQDLEPQSLDGALESWTSIVKGMGEVAVREGINEYNSSTDTPQPSSIYISVVEPDGSVFINGPPSRLRKFFSTSGKVQSAAHAPLPVYGGPCHAPHIYDHSHSSWAVKKCRAKVLSRDLSHAAYLLSMADGNPLKADTVLELFESATYILLTSIIRWGDVVNAITASSPLLEKDMKLQVEILRPSPVVDGLVSAIQKSHPGCSAYVVDLGEWIFDDTHISPHGAHEKIAVIGMSCRLPG…
Eurotiomycetes	Aspergillus_austwickii_LH_A515_GCA_037043805.1	SAT-KS-AT-PT-xCP	MIENTTITPSESRSPSPSHANVDMDANIPEEFILFSHELPSGEIQDLIRRLHRYSMLPGYPHLARFLQNCALVLRTEVQKLPRPLRDSVPPFHDVVTLASHWDDFKSSSLSGAWDGAFLCIYEIAMLIGHHETLNTSYRRPACLVGISVGLFSAAAVAVSESLSDLVSYGAESVRTAFAFCVHVQRVSQTLEPTVTEQATSVSWATVVIGVPVEIIREELDRFNHQEELQRTGTNTMPLTGVSISHVDNTSVGITGPPTRLKQLFRESEILRSSRHSELPISGGLCHVPNVYDYDDVRSILATAEVWERWGTRATQVPLISPFTGSPFQCSDAYHLIEAICTEALTKPLFFDKVANGVVTQLSGGQRPDMQSCQILHYRASVMSDTIVADVAEDLSTRD…
Eurotiomycetes	Aspergillus_austwickii_LH_A515_GCA_037043805.1	SAT-KS-AT-PT-xCP-Te	MAQSRQLFLFGDQTADFVPKLRSLLSVQDSPILAAFLDQSHYVVRAQMLQSMNTIDHKLARTADLRQMVQKYVDGKLTPAFRTALVCLCQLGCFIREYEESGNMYPQPSDSYVLGFCMGSLAAVAVSCSRSLSELLPIAVQTVLIAFRLGLCALEMRDRVDGCSDDRGDPWSTIVWGLDPQQARDQIEVFCQTTNAPQTRRPWISCISKNAITLSGSPSTLRAFCEMPQMAQHRTALIPICLPAHNGALFTQADITTILDTTPTTPWEQLPGQIPYISHVTGNVVQTTNYRDLIEVALSETLLEQVRLDLVETGLPRLLQSRQVKSVTIVPFLTRMNETMSNILPVSFISTETRTDTGRAIPASGRPGAGKCKLAIVSMSGRFPESPTTESFWDLLYKG…
Eurotiomycetes	Aspergillus_austwickii_LH_A515_GCA_037043805.1	SAT-KS-AT-PT-xCP-Te	MHQIPVFAGLGSDALFSERTLGTAAEDARTSEGQIILRACHDIFVKEITSVIHSQRLPSDIKLEDFVEPESLIRPQACYQRNSIIQHVSLYTIQLLRYLRYSTEKPGVILGVAGFCAGLLPGAALATSRNTIELLSRGQDFFYVALHVGIRIESYKQVMMGKETCPPHLPCSLVVDGITAQHARELLEEHNRRSPASYIYLSAINSDTCVTLSGRGDHLQQFSQSSVPSQCKIRPTNIFSLYHDRHQLEGVRRDILQDLRNNILLFSTPLHLIAPLFSNIDGKPIDSGQLATLEELCEKLLEMMILEPVNWVAVEDNVLAAIKQPATAVDASFEILNFGPGYGISGARYTLPDNVNIVAASIVEPRPSLQDTTGMLSSNDIAIVGMGVDLPGASNTDAL…
Eurotiomycetes	Aspergillus_austwickii_LH_A515_GCA_037043805.1	SAT-KS-AT-PT-xCP-Te	MVVEERKQIIVFGDLTCDSVAGLRTLVTVKDNPLLISFFERVTSGLREEIGLLPFSQRQRFIRFTTFEELLARVQRSTCPHPALEKALACTYQLACFIRQYTSPGHKYPSTQQTCLVGLCTGLLSAAAVGCCQSITDLLPLATHTVLIAFRAGLFVADVRDRLEPQTGAPLAWSVLIPGLDGDTASLTLQKYNEEKGLPATSAPYISTYANTGVTLSGLPSALNDLLDSSCLPKNRALTIPIYAPYHASHLYGQKNIESILRKASATEFASYQCQFSILSSITGQSIQVDTFGALIDYALNAILREPLRLDRIVSSLGEALLSDSPIRGCTILPIATVIGQSLAAALRKHGAPDITVDPCMNSSIAVRDDRTSTTGHLGHSKLAIIGYSGRFPDANNNE…
Eurotiomycetes	Aspergillus_austwickii_LH_A515_GCA_037043805.1	SAT-KS-AT-PT-xCP-xCP-Te	MVNIYIFGDQTVRVDDAVHKLLHVKNNPILKSFLDESFAAIRKQIFRLPANERTSLPDAHTLPLLLEAVRRGRRHVALESALVCLCEIGQYIALLQTTDLCHPPTGSILVGFCTGSLAAAAVSCARTSIDLLTLGIEAVVVAFRVGMHVARRANALGRDGGSQWKPWSLAVTDGSESETEKILEEFTRDEVSGVHVANRHDAYILAKGLPAIMKPYVSAAGSNTLTISGTPRVLEALKASPRLRGTKSLPVSIYAPYHATHLYNEADVESIFACKPVESALFHRELRTPLISCATGTVLKEKTFGDLLRALVMEILTCQIRFDKVEESIVPHTPGATAQLIPIHTNIAPRMKTSLTQVGLQVECFKAIANQEPAAEALSESPSNDSSKIAIIGFSGRFP…
Eurotiomycetes	Aspergillus_austwickii_LH_A515_GCA_037043805.1	SAT-KS-AT-PT-xCP-xCP-Te	MEGPRGVYLFGDQTSDFDAGLRRLLQVKNNTIVASFFQRCFHALRQEIARLSPSERKIFPRFTSIVDLLARHRESDPNPALESALTCIYQLGCFINYYGDLGNVYPSASDCHIVGLCAGLLSSAAVSCSNNVGELLPAAVEAVVVALRLGLCVLKVRELVSSDQASSTSWSVLISGISEKDASQLIGEFTAERAIPPSSKPYISAVGYNSITISAPPKVLDDLIDSRLSKSHKPVRAQIHGPYHAAHLYDGRDVDRIIESCHNEVVSNYTPRIPVLSSTTGQPIEAKHMKDLLKAALEEILLRQLCWEKVTDACYSILKTARHQPCKLFPISSTATQSLFTALTKAGITDIEVENGLGDVPTNPKDNLNISGRADCSKIAIIGMSGRFPEADGTESFWD…
Eurotiomycetes	Aspergillus_austwickii_LH_A515_GCA_037043805.1	SAT-KS-AT-xCP-MT-Red	MVNSGSNIKSESLTLVFGPQDPNLDNTFLQSLRTTLLETPELQWILETLTQLPQEWQKISDAHSELAAFQGQRYLQLLNEWVRRGTLPSNLFPLPNILVTPLVVTTQLAQYTKFITQLNPGITSNDSLQGALKLDTETAGLCTGLISSAAVAISGTLAELQKHGAAAIRIATAIGALVDAGDSEREDGDKWESLAVGWTAHGTESKLESIVDGSPEAYVSVISEARLATLTVLKADTPELLEKLKAAGVIFTKTALRGPFHCGKRKDQAASLLQLFDSDPSFQFPHASQLAFSTRSADSGKFRIEDKLHHEAARAMLTDKADWHKLFTALHESTSTRPSLTICFGSQRFVPQWFLRKLGPKLAYAADLDANPGQLPPALGALLGPIEDDAIAVVGMACH…
Eurotiomycetes	Aspergillus_austwickii_LH_A515_GCA_037043805.1	SAT-KS-AT-xCP-MT-Red	MLSQLEPPPGGKTVFIFGCQCLSFNFDDFHRLRATVLETPEHRWIQDVLSELPVYYRTASTTYVQKLKNIPGTQQLRNLAEWFRTGQVPTDSFPLPYIQLAPLLVITHFTEYWQYLRIRHHKGPTSVKESSAENPVVEIVGFCIGFLSAAVVSAARNQEQLSKYAAVALRLATLMGALGDAQEREEEYTSLATVWKAAELENRLPLVLEAFPESYVTVRFDTNRVTIMTPRRTIKQLENELQSAGFNTTQVEFNGRYHWAGHEDTLHALSRMCDSDPALQLPDASQSVVPTRPNIPMDTPPKGPLHELVLWSILAKQCQWLDTFSKVYQAHLEDTASLIIEFGPERCIPPTYMRKLQGRTVHFADLDLNTLSRTPPLYQTPRSYDSDIAVVGIACRVAG…
Eurotiomycetes	Aspergillus_awamori_IFM_58123_GCA_003850985.1	A-xCP-KS-AT-xCP	MVPEDDFNLTDDPSKLGHNVVSLFDQTQTRYSPKAAIVCGEHTLTYGALASDSDRLACLLLSRGISRGHVVALALDRTPDLIMFILGVLKAGATYVPVDPALPPERVNQMLDDEALRLVIVSPVSTKGGAGTGRYDYGNKAVCCTTSELQDQMRYQADKRPAVDIQPDDIAYILYTSGSTGKPKGVEIHHAAICNYALSVHQRPGCTDQDRVLFKSTISFDMAAFEIYVPLLCGATVVQAQAHEIGDPRALMHLIDRHSVTFSVATPTILQMMLDSGWCGTPGFSKLVTGGEALSPRLAERLTACVEEVWNLYGPTETTASVAAWKVQVGEDILIGTPNPNTRLYVLDADLQPVPVGSTGELYISGAGVARGYRNNPERTKAAFLPDPFWEGHTMYKSG…
Eurotiomycetes	Aspergillus_awamori_IFM_58123_GCA_003850985.1	KR-KS-AT-DH-xCP-xCP-MT-Te	MEMWSASDPAWSLSATPKQFRRFIQFDLSDFYAVLRPYTRERGSMLAVFNTQDESMHKLIKSPIAPLFSLSNVVHFEGLVEGVLACLSEQFDKRFVATGEAFDCAEWLQYFAFDVMGTMSFSKRYGFLEQGRDVNGMLRAIFEFFMVAAPMTQLTWLDPILYKNRLAHSFRQTPGMSILGFVGKAIGGRLAKSGDVKEDSGFTPPNKDFLARFLETQKLNPKLPPWLGLMRIQNTQGLHGLDIFQCHCWLRFGWDCDENCHMVNHLLSYSESLERLQRELDGANLTRPYPQWSEVRDLPYLDACIQEAARLHPPFALPLERIVPRGGVTVLGHYLPEGTLVGGNPYVVNRHEATFGPDVEAWKPERWLNAEDDHKRLLEQSLLTFGAGRRVCLGRHIGI…
Eurotiomycetes	Aspergillus_awamori_IFM_58123_GCA_003850985.1	SAT-KS-AT-PT-xCP	MSAPTKLVFFGNEFPNDDLKALFRGLHRHGKDRRFRQLATFLEESTRVLQSEVAQLPEPLKKLVPHFENLMPLTEVDFRQGPLGAAMESALLTILELGMFIGHYEAEERVWDLSADRTTLAGLSIGLLAAAGVALSTHLAEVVQNGAECVRVSFRLGVYVHDISRKLEAPQADGSLLSWAHVVTGETASDLQEELSRYNTETGTPELLKVFISAADKTSVSVSGPPSRIRAAFRASQRLRYSKSLALPVYDGLCHAAHLYDEETIHRVLHPDGSVIPTSRPVQLALLSSRSGQPFEATTAAELFRAISTELLTGTIFLDNITAGILDRTERCADATQCQIETYRTSLVFKGLLKALEACFPDRTISTTDLIPWVFQDYGARQPKSCADSKLAIVGMACR…
Eurotiomycetes	Aspergillus_awamori_IFM_58123_GCA_003850985.1	SAT-KS-AT-PT-xCP-xCP-Te	MEGPSRVYLFGDQTSDIEAGLRRLLQAKNSTIVQSFFQQCFHAIRQEIAKLPPSHRKLFPRFTSIVDLLSRSRESGPSPVLESALTCIYQLGCFIHFYGDLGHDYPTPSNSHLVGLCTGVLSCTAVSCARNVGELIPAAVESVVIALRLGICVFRVRELVDSADSESTCWSALVSGISEAEASHLIDEYSSKKATPPSSKPYISAVSSNGVTVSAPPTVLDEFVETCISKNYKPVKAPIHGPYHAPHLYDDKDIERILQQSSALEGLTGCSPVIPIISSNTGKPIKAKSIKDLFKVALEEILLRRLCWDKVTESCTSVCKTGTNHSCKLFPISSSATQSLFTVLKKAGVSISLETGVGEIATNPEMRNLTGKAENSKIAIIGMSGRFPDSDGTESFWNL…
Eurotiomycetes	Aspergillus_awamori_IFM_58123_GCA_003850985.1	SAT-KS-AT-PT-xCP-xCP-Te	METVAEVFIFGDQTVVFELTLHSLLHVKDNAVLTDFFDRVGFQLRRHVGSLPLHQQEWFPYFTTLIDLLAQHENCYAAPALKLPLLCATELGQFIRHYGQAGRTYPAPESTFLIGACTGAFAAAAVATSLTLAELVPAAVEAVTVAFRTALRSLILRSDLVPTVEETPESWSAIVGVSETEATSAIQGFNAEKGLPPAYRLYLSSVSRTNVSISGPPHLLGQFLSSYAWKHSFLPIELPYHASHLFRKADADVIVDDIHDSSLLKYTLRTKVISAVSGEIITASDLRSLLLRAVQEALCEPLQWNRITASLSRELKQGQFTDCIINQVSSRSGTLLSSALSQEAFLQVKIVQSIGDASVHSALSSSTGKFSQSTIAIIGFSGRFPESGSNEEFWEMLLA…
Eurotiomycetes	Aspergillus_awamori_IFM_58123_GCA_003850985.1	SAT-KS-AT-xCP-MT-Red	MVTTTRATNPTNTLLLFGPQALSFSAATFADIHARVVQTSENAWIKQTITSLPGLWDALVKEFPQYGALEGKQLLRNLDRWFETGTMEHAEPHLPNILLSPMVVITQLTEYVDYLKTMPHAADQQTETVGFCTGLLTALAASLASDIKGIRQYGAIAIKLAMIIGAVVDVQDITSPNGPSKSLAVAWDSAETQDRLNQIIDQSPEAYISVEYDYNRATITTAARSISSLQQRLRNAGLIASEIGLRGRFHCACYEKDIEALSKFCDSVPSLCLPDAAVLALPTRSNDAGSFILSGKLHHCALRSILLDTSHWYQTLDVVRQSCLKSPSSMVVSFGPERCIPPSILKGLSSIVTTAAEYQPSYLHRDPELCNPNEIAVIGMSCKVAGADDVGEFWDLLCK…
Eurotiomycetes	Aspergillus_awamori_var._piceus_JCM_22320_GCA_001599415.1	A-xCP-KS-AT-KR-xCP-Red	MGDMDGTISNEDYLTIIEQFNATEDATTLGFCLPELFEKVAERYPNNIAVIYGDTQLAYGTLNRLANQLARILVEERGVGRGDVVGVALDRSIDLIVAVLAVVKAGAAYVPIDPAFPADRVTHMVNDAGPKLVVVSDSTVTALSPWRDICLSIDTVRGNMKQVDSSNLTTQNVRPENLAYVIYTSGSTGRPKGVEANHGALCNLLLSMQKEPGCAPGDRLLAVATISFDMSILDLLLPLASGAATVIAPTEALRDPGALLKLMERHSVTMIQATPSFWQMLLDGGWKGQPRLVKILTAGEPISRRLLDRLLAYGDMVWNGYGPTEATVYASVGRVSQDEQDIVIGHPIANFQLYVLNPKDLTPMPIGGLGEVYIGGCGVNCGYRNKPGMTKERFLDNNP…
Eurotiomycetes	Aspergillus_awamori_var._piceus_JCM_22320_GCA_001599415.1	KR-KS-AT-DH-xCP-xCP-MT-Te	MANDDLIHKLTWSPAALSKEPLSIAHVVFVVADKESESLSVYQRQLVNEGITTFVTDDAMKIDPLITPGTIVVYIPPTAKSKNEIYAAASQACTGLISVAQQLNHRIISAKSETVKLFSIVPLDRGIGDLVYAPLQGLSRVLKTEIPEIFGGLFEDDRGVFPLSAVKYAQGFDVVRVCEGEARVAYLQPFTDDEPSDKKGLQLHANSSYLITGGTGGIGLATATWLAQRGARNIVLVSRRGLPPSTDSKPVEANSADPISRIAKLKAVGILVHVLAVDISKPNADVTLSQAINDLGIPPIKGVIHAAGTAGYHTLTRCTPTDIADNLAPKVIGSLNLDSLFPPRTLDFFVFTSSVGQLVGFPGQLAYAPSNAFLDALAAHRRRQGDNSMAILWTGWQGT…
Eurotiomycetes	Aspergillus_awamori_var._piceus_JCM_22320_GCA_001599415.1	SAT-KS-AT-PT-xCP	MRVVFFSNKFPGVDLRDLSQRLRFVSRSRSHGLLRRFLEEATMVAHEEIRRLPPELKTLIPPFQSILDLVDSFDWHGGPLTGVFECAFTCLFHISLFLGSYERNPQEFNFSNSTFTGLGLGLLAATGIVASQTLLDVPQTSAEAVRIAMRTGYLLYQKQQEIEPQEPDAPPKSWSVILKNMDQATVQETLDHFNASIDVSITGKLYISVIEPDGSLFVNGPPSILAKIFGKTGKLASARHAALPVYGGPCHAAHLYDRADSAHVAETVSPKIANRRVPSNVCLLSMVDGKPLGSQTVLELFESAIYCLLTGTIQWGNVAEAIFSSPDWNEEAHVRLESIFQPCPVVNTLISRAQATYPHCTVDTREHMQWVFMEENKPTNPSSTDIAVVGMSCRLPGGA…
Eurotiomycetes	Aspergillus_awamori_var._piceus_JCM_22320_GCA_001599415.1	SAT-KS-AT-PT-xCP	MSAPTKLVFFGNEFPNDDLKTLFRGLHRHGKDRRFRQLATFLEESTRVLQNEVAQLPEPLKKLVPHFENLMPLTEVDFRQGPLGAAMESALLTILELGMFIGHYEAEERVWDLSADRTTLAGLSIGLLAAAGVALSTHLAEVVQNGAECVRVSFRLGVYVHDISRKLEAPQADGSLLSWAHVVTGETASDLQEELSRYNTETGTPELLKVFISAADKTSVSVSGPPSRIRAAFRASQRLRYSKSLALPVYDGLCHAAHLYDEETIHRVLHPSGSVIPTSRPVQLALLSSRSGQPFEATTAAELFRAISTELLTGTIFLDNITAGILDRTERCADATQCQIETYRTSLLFKGLLKALEACFPDRTIGTTDLIPWVFQDYGARQPKSCADSKLAIVGMACR…
Eurotiomycetes	Aspergillus_awamori_var._piceus_JCM_22320_GCA_001599415.1	SAT-KS-AT-PT-xCP-xCP-Te	MSKMETVAEVFIFGDQTVAFESTLHSLLHVKDNAVLTDFFDRVGYQLRRHVGNLPLHQQEWFPYFTTLIDLLAQHENCHAAPALKLPLLCATELGQFIRHYGQAGRTYPAPESTFLIGACTGAFAAAAVATAQTLAELVPAAVEAVTVAFRTALRSLILRNDLELTIDGPQKSWSAIVGASEPEAANAIRCFNVEKGLPPVARLYLSSVSRTNVSISGPPRLLGQFLLSCAWKHSLLPIELPYHASHLFRKDDAEIIVGDFHDFSLLKYTQRTKVICAVSGEVVVASDLRSLLHRAVQEALCEPLQWNCITASLSQELKQGQFTECVINQVSSRSGSLISSVLLQEAFLGVKIVQSIGDVAVSPALSSPTGKFSQSSIAIIGFSGRFPESGSNEEFWEM…
Eurotiomycetes	Aspergillus_awamori_var._piceus_JCM_22320_GCA_001599415.1	SAT-KS-AT-PT-xCP-xCP-Te	MEGPSRVYLFGDQTSDIEAGLRRLLQAKNSTIVQSFFQQCFHAIRQEIAKLPPSQRKLFPRFTSIVDLLSRSRESGPSPVLESALTCIYQLGCFIHFYGDLGHDYPTPSNSHLVGLCTGVLSCTAVSCARNVGELIPVAVEAIVIALRLGICVFRVRELVASADSESTCWSALVSGISEAEAGRLIDEYSSKKATPPSSKPYISAVSANGVTVSAPPTVLDEFVETCISKNYKPVKAPIHGPYHAPHLYDDKDIERILQQSSALEELTSWSPAIPVISSNTGKPIKAKSLKDLFKVALEEILLRRLCWDKVTESCTSVCKTGTNHSCKLFPISSSATQSLFTVLKKAGVSVSLETGVGEIAMNPETRNLTGKAENSKIAIIGMSGRFPESDGTEAFWDL…
Eurotiomycetes	Aspergillus_baeticus_NRRL_62501_GCA_027569055.1	SAT-KS-AT-DH-xCP-MT	MKVCAEHPSGKVRLLFGPQCVEVEDQVTRIRNALNRYPYELQFLYEIIGELPSLWPIITAAWPTLNQVPGERELTTLAQLLNSECPVGKLKGRLNVLITPLTVIAHLAEFWQLQDAASHPALPCKSPVAPQPPLPRVIDTQGFCIGILAAIVVACSRDQREFASVASNAIRLAVCIGALVDLDQMESGETILMAVRWESQDAYDHLQQILTEEPDTYISCYTDVNNVTITVPINSTQRLKRKLGRAGLPSTQVPLSGRFHHQATHGMGLKQVLQLCKTDQHFQLPNSDELMFPLRSNQDGEVIGPGTSLHAVALETILCARADWSKTISSLLTSKEMEVGGSHFLSVGPNEIVPPSLRGHPANQDTIARANRAQRLVNGHAPGGSADSVMDGEEKVDMR…
Eurotiomycetes	Aspergillus_baeticus_NRRL_62501_GCA_027569055.1	SAT-KS-AT-DH-xCP-xCP	MQSQNRPELRPLLEAIRALPELWATLKMGEPGLQALSDEPVLSLRDWLSPSSSSLHNGITKNSVSDGHGNGYSPLTVPTTLPNVLLAPLTVIIHIAQYIHYLDGLRLDLGRDGAGTGADADVHAYIREAFAAAPPAQTPDTDIERESKFQGLCIGTLSGAVMECSSTRTELGQNAAAAVRLAMCIGAYVDSKRLLAISGSNSSLNSNSENMCFIARWGVESGRENVEAILNRHPEAYISVELDNNSVTITAPECDTPSLWVELNSQGVRVADIPVRGRYHSSKNEELLQSLLELCSSDSASPFWVPWGVEKLERCLRSILTEQARWLSDISKTVSSLTPISTITALELGLVSCFPSSLSALPHHRIVRGSLPLPAPQAEDQDEDRDPYNYPETSVAIIG…
Eurotiomycetes	Aspergillus_baeticus_NRRL_62501_GCA_027569055.1	SAT-KS-AT-DH-xCP-xCP	MAQPAALVFGPQTTLPSSELASQLRTALLLNPRLYLIRESIEVLPVIWPVLLAADPALYQVCGARALKDLSRWLSHGEFPAAREISELPSVFVTPFTVILHIVQYLSYTDPKHGGPRHEDVLESVKEQGGVQGFCSGLLAAVAVATSPDLETVYRRAEVVLRLAVGIGAYIDLDCVDSKISSIAVKSRPATPPHNELQDYFDDLESTYVSVVTDASSRTVTTPTALMDAVSQKLRAQGFAMKHVDLRGRFHYSGHARAVDTLRRLAGSNPDFQLPQTDSLLAPVYSNVDGQAFPQGPIGDTLLESILLHRCDWYSTMSAAMAGLASEDITVVQFGLVECVPASLLRRARASVQRISSIPEQSLSTSIPTTIDRTTKAGAEPIAIIGMACKVPGADSLEE…
Eurotiomycetes	Aspergillus_baeticus_NRRL_62501_GCA_027569055.1	SAT-KS-AT-PT-xCP	MKDDRQSTELIFFGNEFPNDDLKGLFRNLLRSAKDRRFRHLGSFLEESTLVLKREIAALPQSLKVLVPHFHSLMSLVEVDDFRQGPLGAAMESALLTVLELGMFIGHYEAEGGEWGLSKHTTTLAGLSIGLLAGAGVALSSNLAEVAQNGAECVRVSFRLGVYVNEISRKLEAPQADGTLLSWAHVITGQTQSAIQDELSQCNSESGTPELLKVFISAADKTSVSIIYDGLCHATHLYSQDAINTVINSEESIIPASRPVRIALLSSNTGQPFMANNARELFLAIGTELLTCTIYLDRITAGILERVSGIKSKHCQIENFRTSIVFRSILGAIEANYPSLEIKLVDLIPWSMRDYGPRQPRSFADSKLAIVGMACRMPGGANDTELFWEILEQGRDVHT…
Eurotiomycetes	Aspergillus_baeticus_NRRL_62501_GCA_027569055.1	SAT-KS-AT-PT-xCP	MATPRPRLVFFGNEFPSDGLKELFRRLKQHSRDRRFRLLSMFLEESTAILKEEKSKLPQQLQQLIPHFDTVCVLAEVDFRQGPLGAAMESALLTTLELGMFIGQYEAEGAEWDLDPSQTNLAGLSIGILAGAAVALSSNLADVAKVGAESVRVSFRLGVYVAGISAKLEAPQSDGTLQSWAHVVTEMTQEAVQNELSQFNSATQSPELTKVFISAADKTSVSVSGPPSRVKAAFQHSPILRYSKRLPLPVYDGLCHASHLYNRDDIETVINSSESVLSTSRPVRLPLLSSQTGTPFRAKTARDLFLEIGTELLTGTIYLDKVTTGIIKHVKLHAAGGQYQIDSFRTSLVLQGIQSAIEAGVPELPLARQDLVAWIHGDYGARRPASYADSKLAIVGMAC…
Eurotiomycetes	Aspergillus_baeticus_NRRL_62501_GCA_027569055.1	SAT-KS-AT-PT-xCP	MADITHLEAAEVKSLEGSLEEGRKKLVFFGNEFPSDDLKLLFRHLHRHSKDRRFRLLSAFIHEATLVLKDEISKLPKILQDQVPHFESVLILAEHGDFREGGLGAAMESALLVVLQLSILIGAHEAENRELNLDSSTTTLAGLSIGLFAGAAVALSNTLADVLKNGAESLRVSFRLGVYVEEFSRNLEAPQPDGALQSWAHVVTGMKAEDVQAELSKYNAESEGPELTKIFISAADKNSVSISGPPSRIKEAFQRSHDLRYSKSFALPVYDGLCHASHIYGQQEVSAVLDKSAALVPLSRPIQHSLLSSRSGKPFTATTAGELFEEICTELITGTIYLDNVTANIIGRICCGFSSPPHELEVDTFRTSIVFKGIMETIQATYPEIEVKRNDFVDWVYKD…
Eurotiomycetes	Aspergillus_baeticus_NRRL_62501_GCA_027569055.1	SAT-KS-AT-PT-xCP-Te	MATTNPPTRRLLCLTMLGYKKPGLTEEELCDFQARQHSQMVSGMMEKYGVVHYSITHNAAKPMSLIPKLFDPAYVSFSDHDFVVQIIIPSLDVFVALKEDPVYKERVALDHLNFADRSSPERKTRMSLGYVHEIIRDGKVVYVDAADVDLQALCTIRGNPLLTSFLDQAASALRLEIGSISLAQKSGLPSFTTLSELLAKLRSSAALHPELETALISVLHFASFINHISQPGQVYPTDADARVTGLCTGLLAGAAISCCRSLSELIPVAVHTVTVALRIGLLVNGVRRRIDPCGDTADSWSLVMPGLNEDSATAVLEKYASEMGIPVASRPYISASARCGVTLSGPPQALSHLCASNYLPKRTNLQTRIHGPYHAKHLYNMVDVEDLLLQSVSRGTFGG…
Eurotiomycetes	Aspergillus_baeticus_NRRL_62501_GCA_027569055.1	SAT-KS-AT-PT-xCP-Te	MGGQHFLLFGDQTVELIPSLQRLLRLSQSSPTASVFLQNALDVIQRKASALSAKERSNIGHFESFQSILQKYSHTEDTIGVTNTVVICACRLAELIILVENDPSLLGASSKVTALGLCTGLLPAAALAGSRNISDLVSISVETVAICFRLALELYRRTRHIEEVPGHWAYTILGVPAQEMETVLEDFHRSKSTPSHRHVFIGVEEESWLTLFGPPPELEQLFSYSAKIESAPKLKLAAYGAVHSPHLPVPDVEAIVGTSSIMDRTVSSRVRVLSTSTGEPYYASTLRELFVQVSQEVVQKRLKMNIVLKSAAQGLSSTKPVQLTVVGLTNATPIVKRALDEQRLSVSVLNEPTGVSQPSGDTRAGSNSVAIVGMAGRFPGSEDLEGFWQSLLDGLDAHE…
Eurotiomycetes	Aspergillus_baeticus_NRRL_62501_GCA_027569055.1	SAT-KS-AT-PT-xCP-xCP-Te	MASSHEHTRLFLFGDQTYDFVPELRSLLATRNNPILVAFLEQSHYVVRAQMIQKLPPKEHKQSRSASLAEVVQKYVDGKLPSAFQTALSCITQLGSFMRQFDDPSIPYPRFNDSYVLGVCTGSLAAAAISCSTSLSDLLPIAVQTVLVAFRLGLCAQEVRDRLEISTQNRTQPWSVVSEVPPEEVAIAIEKFSQETALSTTRRPWIAASSVKTTTISGSPSVLSQLAEKSHLKEGKRWMEIPIYVPAHSSQLFSSKDVDDILETTHQDSWSSHGAKIPFLSSVTGKLGWARNYRDLLHLALAQCLMDPIRWDLVETELPRLLKARTGDSSIQIMPFTTVLTKSLTGALTSEGFTIKDVGTTTGPIPDAFSHRPGLGRSKLAIVSMSGRFPEAQSTDSFW…
Eurotiomycetes	Aspergillus_baeticus_NRRL_62501_GCA_027569055.1	SAT-KS-AT-PT-xCP-xCP-Te	MHRPLQVDRLNLVLLGDQTSNVSALLKKLLLAAPHSVAQTEFIRDASAALRAQSDRLRPFQRVHLPSFTNIHDLARIYHESQGVCHPSISSALLCVTQLLQIFRYFEGRGRRPENNELITVAGLCTGSLVAAAYAASASLDDLKHLAVPTVSMAFQMGLQAATASSMLHEQGTPLGSWSIAIPKMTEDEALSALNIYDAGGHLSLRHRCFVSAVGLKSVTISGSPPALNRFAESLTASQPSRKIIWLPIYAGYHASHIHTVLDFQSFLSRCGIDAELLSSFKTLKTLLSPLTGQPVDSPNALGLFKTVVHHTLQAPLRLDLILDRCETLIQDNGISTVRIDAVGPTPVAESLAATLRGCTEATVSVHDLVVLEPGVDEYRPSASFSHAPLAIVGMAGRF…
Eurotiomycetes	Aspergillus_baeticus_NRRL_62501_GCA_027569055.1	SAT-KS-AT-PT-xCP-xCP-Te	MEDLYQVYLFGDQTGDFEVGLRRLLQAKNHTLVSAFFQRSYHALRQEIASLPPAERSMFPRFTSIVDLLARHCESRGNSAMESALTCIYQLGCFINYHGDLGHAYPEPSKSHLIGLCTGLLSCAAVSSATNIGELLTPAVEAVVVAFRLGLCVLRVRGLVDGDQAVPLSWSALVSGINEAEGTEIITKFSNQNAIPPSSRPYISAVCANTLTISGPPHILDKFIDVSLSKQQKAVRAPIHGPYHAAHMYDSRDVERILQSCDTDIVCNYKSRIPVLSSHTGKPITVETMKDFLGLALEEILLRQMCWDKVTDSCVSILKSVGNRASKKVFPISTTATQSLMNSLKKAGHSDIEIDGSLGDISAEPQGHNHTGRAELSKIAIIGMSGRFPEADSPQDFWN…
Eurotiomycetes	Aspergillus_baeticus_NRRL_62501_GCA_027569055.1	SAT-KS-AT-xCP-MT-Red	MASGIRSSLSLVPPVENSTGIGQSRSNGTERPKGKNNNVGNVVLVFGCQWLSFDAGDFRRLRAAVLDNPENHWMLDVLSELPGYYRTASETKHLPALKTIPGETGLQELERRFRCDDLPTAKFPLSYTQLAPLLMITHFVQYGQYLKLTKAKPGCRRDNPGEGSSSVVEIVGFCIGLLSGVVVSAARNQEQLRRLGAVALRLAIFLGALGDVQEKEEEYTSLATAWRTAKLEEKLQGVLDQYPGSYTTVRYDENRATIMAPRRSTADLQQSLQSAGFTATSVDFNGRYHWPGHEKTLPALFALCRADRDLQLPDASELIRPLRTNTTAEPVLSGPLHELVLRSILAETCQWHMTFSAVYQEHLTSSGSLVVEFGPEHCIPPSFLRRLPQRVIHFADLEL…
Eurotiomycetes	Aspergillus_baeticus_NRRL_62501_GCA_027569055.1	SAT-KS-AT-xCP-Red	MQSTDSEPQAGTLLVFGPQSLTFDKRALARLRDEINSSTHRRWIQETLAGLPTYWSALCDALPEIPTLLPEADQHLNQLSRVLEHGLEESSLPNIILTPLVVLTHLIEYSRYLTTQDTQSPTNTSAIGFCTGLLATYAIASSDPTTPNEFSHYGAVALRLATLIGALVDAEESRQSNSGTGRSSSHTVGWNTAEQEAKLHEILKRRHPEVYMSVRYDRARCTLTASGAASAAAEVTQALREAGLSATEVRLQGRFHDPNEARRGDVEGLVEVCTRVPELQFASAPTINLPGYTEGQSMAELAIQGMLVQFCDWYGTLEPFTTTPSAPRVVCFGSEKCIPPTLTTILQPLYMHSIKAPEPQGFPGVNPDNLIAVVGMAVKTAGADDVDEFAQMLRTGQAQ…
Eurotiomycetes	Aspergillus_baeticus_NRRL_62501_GCA_027569055.1	SAT-KS-AT-xCP-xCP-MT	MAIAKGLENSLPDAALQKNKRHQLVKDLVILSRFNRYNPFLATFSGVWATLLAGASQCEGNPTSTTTTHVFHQALLVFVSGYLFCGAGMVWNDWVDLKIDQQVARTNQRPLAAGRVTTLQALLWMTAHSATYRTPVKAGVWLTTIHYTAGSREAMIPVTISTILYPYGKRPFFKAIYFYPQYFLGFTLGWPSVIGWLAIKGQTQPLRESIAEASALGLTVFTWTLYLNTAYSYQDIEGDRKAHVNSIYFLAGAYIHYFVIFLAGLVVVAIAVQLSSSQGSQWLWGSWLCVWGWSFAGQLVRFSSRNPASGGTLHKENFALGIWTVIACAVELVLQCGVSKCQLGMASPLPATVICGPQTIPPPPQCLEQLRARLAHDPELKPLLEAVLNSPSLLSQLQA…
Eurotiomycetes	Aspergillus_biplanus_NRRL_5071_GCA_027569045.1	SAT-KS-AT-PT-xCP	MKTNCTPLIFFGNEFPSDDLKDLFRRLHQHSRDRRFRLLSLLLDESTAVLKQEVAKLPRELQDLVPHFDTICTLAEVDFRQGALGAAMESALLTVLELGMFIGNSEAKDAEWELDPAHTQLAGLSIGLLAGAAVALSSSLGDVARMGAESVRVSFRLGTYVAGISSKLEARQADGTLQSWAHVITEMGHEAVQKELDQFNVATQNPELTKAFVSASDKTSVSVSGPPSRVKAAFQHSPTLRYSKSLQLPVYDGLCHAPHLYSRDDIETVINSAESVVPVDRAVRLPLLSSQNGKPFAAKTARELFLEISTELLTGTIYLDEVKAGILAHVEQRTNQEKYQIDSFRTSLVLQGIQSSIETGFPELSLVRGDLVAWVHEDYGARRPASYTDSKLAIVGMAC…
Eurotiomycetes	Aspergillus_biplanus_NRRL_5071_GCA_027569045.1	SAT-KS-AT-PT-xCP-Te	MAQRILLFGDQADAPIPMIRRVVDKARHSKNLEAFLQSAIDHVQLEVAKLTPAERETVGSFHSVQDLTTALTSKTDRYGIAQMVVVFIARIGELILHAESNPSLLSGDSTLLSLGICGGLLPAAAAAVASNVAELIAVASYLAAVNCRVAATISRRSVQIEDDTGSWAFSALGAVVAKLPAILDQFHRDQAIPRHRRAYIAISTPTWATVFGPPSVLTQLLDTASTLKTSEITILPAFGAVHAGHLAAPDFTELISESPLLDRPLKANYKLLSGSKYAPFPCSTLRTLLPQILTDIFQNATNPARLFEVGGSYLDKSKDVSLYMLGSTSYLVLLRRSLHLQHHKVTLHTNPPTSPHPSLRSGSNSVAIIGMSGQFPGAASVDEMFESLMNRDEHHQKIP…
Eurotiomycetes	Aspergillus_biplanus_NRRL_5071_GCA_027569045.1	SAT-KS-AT-PT-xCP-Te	MPSHNVLVFGSEAVDSVAALGDLHNLAKSRPQLHHFLQLAVRAIRSHLLELSIADRSLFDGLPSIIDRVDRNESQGAPSALCSSVLLTIIQIGEFLVYVEDNPHLDAANAGASYAGLGVGLLAACAAAAARRANDIVTIGVQAVLISLNIAVELGHRTNLIVGGGETQWASAVVEMPQSNVQSHLEEHSSKIPALKKAYISVVGDTWVTVSGPLSTLEQATNLDVFQGKVSTFSTNATALHAAHLSGLDVKKLVPQSPILETSWSSSSCFSTGRCVPFRPCRLGETVANVASTVKGEGGDDVSVVGFGEFPPPVSQLLRERLGEVRRHVPLQPQDETGSSSGHIAIIGMSGRFPGADTLDELWGLLQGGKDVHQRIPSTRFNLSEFYDPSGEKKNSILT…
Eurotiomycetes	Aspergillus_biplanus_NRRL_5071_GCA_027569045.1	SAT-KS-AT-PT-xCP-xCP-Red	MAHDLKLYLFGDQTFPLHPHLKTLLYNKPNPVLQAFLTRAYDAIRAELYQLPPRVREHLPRFTCLDDLLLWSPSGPRCIPLDMAVTCLYHLGTFISQSDADDFSADKSRVLGLCTGALAAAAVSCSRSTLDLVPLAVDTVIVAFRTGLLVADAVHRISPSTRESDEVWSLIVPGLAVADAVDQFCTQTNLPLTSKPYVSAYALNGATISGPPKSLAQLTSSESFKDIKYKTIPIYGPYHAPHIYSARDSATILSGVISEGLSGSPQRIPLLSSTGYTIKDQSFAALLQAAVEDIILHSIQWSGIIDTIQTTLQDVGPKSFTVVSIGSTADQLIYTALKRTPLCSLLPEPTRPEGIRAPATGGTTPQRPKLAIIGMSGRFPGAKDNDAFWDLLYQGLDVH…
Eurotiomycetes	Aspergillus_biplanus_NRRL_5071_GCA_027569045.1	SAT-KS-AT-PT-xCP-xCP-Te	MEEQLNSTLETHRVAFFGGQGSRAVFSHERAATTTQRSRTAGKLLSACYNAFQQELSNAREQETGTNPVLMELVELTSAESLLSPPSTHHSNPIIQGVSLLVQQVLSYLGYVEDSAVSSEPKVSLQSILREWDEVMGFCSGVLPAFVVATSSSIEEFLRGCEHAVRMAFWIGYRVSIFCEEKAGAQWRARSWSIAVNGMEPDAVREYIIKQKDGLVCFSARISPDIITVTGTPSALDDFKTDLEVSADPIPVHGWYHGGESTESVVQALLRDVERRDISLTESKSFLVPVRSTVDGSLMTMGDETTLTETAVRIILTHSLDWYKTWESISLGATMTELHAFGPHSRSFFSANSKNTRVIDHSVPNSQRGPHEDIAIVGMSVNFPSAPDKETLWKNLESG…
Eurotiomycetes	Aspergillus_biplanus_NRRL_5071_GCA_027569045.1	SAT-KS-AT-PT-xCP-xCP-Te	MHRPKAMDRLNLVVFGDQTNDLSALLGKLLLAAPQSAAQSDFLRDAGVALRAQCDRLHPFQREHLPAFKDIHGLHKVYKDSNGLCHPAITSTLLCVTQLLQIFRYFESRGRASEDNVNTTVVGLCTGSLVAAAYAASSSLDDMKALAIPTVSMAFQIGLQATIASSMIHGQGSPPDSWSVAIAKMTEDEALSALKKYHEGGRPSLHDRCFVSAVGLRSVTISGSPLALSRFADDLLASTPSTKIVSLPIFAAYHAAHIHTVLNFLAFLKRCQVNPCLLADFKSVKTLLSPLTGEPVEGTNALDLFETMVHHTLQAPLRLDLIMERCIALIERNDVSTVQIDVVEPSPVGDSLAAIFRSRSKANVSTRELVALDTDVDEYRPSASFHSSPLAIVGVSGRF…
Eurotiomycetes	Aspergillus_biplanus_NRRL_5071_GCA_027569045.1	SAT-KS-AT-PT-xCP-xCP-Te	MLISTMEDPSKPPTVAMEPCHATGADQSAQIFLFGDQTIAFEPLLHNLLNVKGQGTLSDFFDRVGCQLRSCIGRLPSYQQDWFPFFTTLVDLFAQHDKHYGSPALKFTLLAVTELAQFFRYVGHGSNLYPSAADTYLVGACTGSFAAAAISTSRTLAELLPAAVETVIVSFRVALRALILRGDLGSQVDGEPKSWSALLGTQEENAQKLVDSFNSTKGLVRVSQLYISSVSLTSVTVSGPPKILAEFVSSTSLKHSFLPIELPYHAPHLFPETEVDELVQSFHDQCLESYRQRLNIVSVVGGEVTTSQDFRTLLRRAVSEALRESLRWDTIATALGKSIIDATHTHCKIYQVSSTSGPFIAAALTRESSLDVKIVNLVEEAPETNHKSNPTGKFSNSDI…
Eurotiomycetes	Aspergillus_biplanus_NRRL_5071_GCA_027569045.1	SAT-KS-AT-xCP-xCP	MMSPSIPSLIICGSQTPLPTSETLGQLASCLEQSPDLKPLREAILALPDVWAAVKKSEPHFQCLRDSPVIRLRDWLALPSSSRADINIGSDILDTLPNTLLAPLTVIIHIVQYQHYLDTFGMGTADTHDRIRDASVSAAQGTGALSKFRGLCIGSLTAAALDCSPIETALGENAVAAVNLAMCIGAYIDLERLAQSSPEMVCFIARWGADHRREDMEGTLTRYSEAYISVELDNNSVTITTPSSDIRSLQRELSDAGVRVADIPVRGRYHSRKNEHMLQSLLKLCLSPFSPCVVPWGAEKLEDSLRSILTEPAHWFSDISRAVNPCSSGSNTAVAVLELGLVSCLPPSLGAVPHHHIIRGSLPQDHYYHYPESSVAIVGAACKYPGADNLDQLWTLVSM…
Eurotiomycetes	Aspergillus_brasiliensis_CBS_101740_CBS_101740_GCA_001889945.1	KR-KS-AT-DH-xCP-xCP-Te	MDIQDPIHRVDWKPAALADTPLAFQRIVLLVNPTSKQETCGEYQKQLTNAGYTVLVVKDISQIQCHLTPGTIVVHIPERAEEKNSVYESATESCNTLIAAAQILSKHGSHQVFSVLPTSTGIAQLGYAPLYGLARVLRMEVPDIFGGLFEAEPESFPLDAIKYARDHDVVRVSDGVPHTACLQPSMKEPDGTVTPLQIRPESTYLITGGTKGMGLHIAVWMAKRGARNIILVSRQGLGEGGASDDSNNALTCHVKDLQSQGANVHVLGIDLGLPGAEKSLRQAIAGLGLPPIKGVVHAAGVAQYKMMDGYAPSDLDYTMAPKAAGALALDSIFAPGELDFFLLTSSVGQLVGFPGQLTYAPANSFLDGFASYRRQQGDACTSIQWTSWRGVGMVAQTKS…
Eurotiomycetes	Aspergillus_brasiliensis_CBS_101740_CBS_101740_GCA_001889945.1	Red-KS-AT-DH-MT-ER-KR-xCP	MTHDSSPLDHASWYQDQVVFLTGATGHLGGCMLYKLAVQLPTKIYVLCRRSLEQAMNKWETSMPDQIEEIFDTGKVHCLIGDTTEPHMGLKKADRDRLQQEVTVVIHGAASISMMEELQKAVREHCSAMTNMIHLASQMTHLRAFVFISSFLVGLLLSNETTQERFLKVAADEPDPEEQVASIVATNSSPYADRFPTTYSQAKYLSERLLLAHQKSLPVLVVRPTSIGPAIRDPYPLYGVAGSVPVDTAFYLYAQSGVYRSMSEMERFSQEAIVDEIPVDLVVNGCLLHIACESRGLVHLGCQLYVIQTFGDLTAQWQKYGPKDLASQMAKLNKERNGALVRHAFEQIYRIHRTWFVDCSRSRHLQTTGGPIGLSLAGHNFEQYVKARVEKQGPSKSSF…
Eurotiomycetes	Aspergillus_brasiliensis_CBS_101740_CBS_101740_GCA_001889945.1	SAT-KS-AT-PT-xCP	MDVFTPNSTEARPMKILYFSNEFPPDDLQELLRRLHTHSKIAQHDILARFIREATLAIRDEVRQLSTTLRSLVPAFESVLELANYSELRKGPLAGSIEGVLLCVVQLASLIGYYENAPREFDHTTVKTRLAGLGIGLMVAGAIGCAPALTDIPASGALAVRLAFRLGILVDEVSHTLQPRDTTGSPDSWAYVLPDVAVDEVQEELDRIHAEQSTPEASKIFISALSATSVTISGPPARLKALFRTADFFRDRKFVALPVYSGLCHAKHIYKTEDVARVVQADSMSSVCRPVLPVLSTSTGKPYVATTAEEFFGQIVSEILTQPITWDKVIEGLVQEADDLATLDCRVFLFRMSLAGSELVNGLTNAKLEVSTEDVLAWTKQPSTVTSTPRGPSQSKIAI…
Eurotiomycetes	Aspergillus_brasiliensis_CBS_101740_CBS_101740_GCA_001889945.1	SAT-KS-AT-PT-xCP	MSASTKLVFFGNEFPNDDLKTLFRGLHRHGKDRRFRQLATFLEESTRVLQNEVAQLPEPLKKLVPHFENLMPLTEVDFRQGPLGAAMESALLTILELGMFIGHYEAGERVWDLSADRTTLAGLSIGLLAAAGVALSTHLAEVVQNGAECVRVSFRLGVYVHDISRKLEAPQADGSLLSWAHVVTGETASDLQEELSRYNAETGTPELLKVFISAADKTSVSVSGPPTRIRAAFRASQRLRYSKSLALPVYDGLCHAAHLYDEETIHRVLHPDGSVIPTSRPVQLALLSSRSGQPFEATTAAELFRAISTELLTGTIFLDNITAGILDRTERCAATQCQIETYRTSLVFKGLLKALEACFPDRTIGTTDLIPWVFQDYGARQPKSYADSKLAIVGMACRM…
Eurotiomycetes	Aspergillus_brasiliensis_CBS_101740_CBS_101740_GCA_001889945.1	SAT-KS-AT-PT-xCP-xCP-Te	MEGPSRVYLFGDQTSDIEAGLRRLLQAKNSTIVQSFFQQCFHAIRQEIAKLPPSQRKLFPRFTSIVDLLSKSRESGPSPVLESALTCIYQLGCFIHYYGDLGHGYPTPSNSHLVGLCLGVLSCTAVSCAKNVGELIPAAVEAVVVALRLGICVFRVRELVDSGDSESTCWSALISGISETEASRLIDEYSNKKATPPSSKPYISAVSSNGVTVSAPPTVLDEFIGTCISKNYKPVKAPIHGPYHAPHLYDNKDIERILQQSSALESLTASSPTVPVISSNTGKPINAKSTRDLFKVALEEILLRRLCWDKVTESCTSVCKTGTNHSCKLFPISSSATQSLFTALKKAGVNISLETGVGEIATNPDMRNLTGKAECSKIAIIGMSGRFPDADGTESFWDL…
Eurotiomycetes	Aspergillus_brasiliensis_CBS_101740_CBS_101740_GCA_001889945.1	SAT-KS-AT-PT-xCP-xCP-Te	MSRMETVAEVFVFGDQTVPFESTLHSLLHVKDNAVLTDFFDRVGFQLRRHVGKLPFHQQEWFPSFTTLIDLLAQHGGCYAAPALKLPLLCATELGQFIRHYGQAGKTYPAPESTFLIGACTGAFAAAAVATSLTLAELVPAAVEAVTVALRTALRSLILRSDLDLTVEEPQKSWTAIVGASEPEAASAIRSFNAEQGLPPVARLYLSSVSRTNVSISGPPRLLGRFVSSCPWKHSFLPIELPYHAPHLFRKADADVIVDELHDSSLLKYTQRTKVISAVSGAVVTGSDLRNLLCRAVEEALCEPLHWNRITASLSQELKQSQFTNCVINQVSSRSGSLLSSALSEELFLEVKFVQSIGDGPVPSVPSSPTGKFSQSSIAIIGFSGRFPESDSNEEFWEM…
Eurotiomycetes	Aspergillus_brasiliensis_CBS_101740_CBS_101740_GCA_001889945.1	SAT-KS-AT-xCP-Red	MEPQQLRELLDARGNTILAFGPQVQSLNESVISKIRSDIDKGPTFFRHALDDLGVYWDALAAKIPEIEQVFPERNFIEDLTRFMHHGQYEDGLWKHTSTLACVAYIAQIIQHWQYLHMATDGLEQSEDPQAAWIAQRKENDTACVGFCGGLVPACVIASAHNMAELEHNAVVGLRILVLMGLIADVDEELNGYAYAFATICRGDEAQDALHRVIERHAPHVHMQATFDIRCATVCVSESVESAFLEEARDAGVKCIKLGFHGRAHDVSAEGERKTSILLQLCEELPGLRLPDASQSALPVYSNINSEAPFTQGSLHEMAIRGILSLPCDWYSIFVNVWARLDDPYVVSYGLEQCVPRSLLFGIKSKVLHLADVKPPPPLPQPPCPNEEMIAIVGMAIKT…
Eurotiomycetes	Aspergillus_brunneoviolaceus_CBS_621.78_CBS_621.78_GCA_003184695.1	SAT-KS-AT-PT-xCP	MVTYTPPAEAQDLPTKLKVLYFSNEFPTDDLSALLRRLHSHSKHSSHPILARFLSEATRVLRNEVSQLRVELGQLVPAFESVTTLAGETKLRKGPLAQSIDGVLLCVLQLGMYIGHCELYPEDRATETNSLLTGLGVGILVSTAVSVSTSLDDAVTAGVEVLRIAFRLGVFVADVSHNLEAVDAESSESWAYVVHGMTVDEAQAELDDIQAKERTPSASKIFVSAISETSVTVSGPPSRLKALFRNYASFRDRKFAHLPVYGGLCHAAHLYTREDAQAVVRSPSLPARYKPVVPVMSTSSGQPFLASSAAELFEQVIFEVLTKQIVWDNVLRGVAERVAKTDVHDVNIKVFRHSLPAQQLSTALTSAMTDLPVDTDDLLAWVGTDVDHGQYSPGSSMQS…
Eurotiomycetes	Aspergillus_brunneoviolaceus_CBS_621.78_CBS_621.78_GCA_003184695.1	SAT-KS-AT-PT-xCP	MAIYTPSRSEDDGSREPVQLRVLHFSNEFPKDGLCTLFRALHCRSKDRRYPLLARFLEEATRALREEIRGLPSSLNQLVPPFESILNLASFTDLRHGPLGGSVEGLLLYTVQLGTIIGYYEQHPETFPSDSTSTVLTGLGMGLLATAALSLAATVADLPSSAAEVVRQAFRLGIVVDEVSQNLQPRETTTPSATPDPWAYVIPGVTAEEIQQDLDVLQKQTPEASRVFISAASVSSATVSGPPARLKELFRTAYVFSNRKFVPLPVYGGLCHAGHIYNDEHVRRVVRTPSISGHHGRSVPCLAILSTCDGRPFTGQDATELLEQIVREILTRRIEWATVVQGVVQQAQGINAEHCHLLVFRNSLASHDLAAALQTINPAVEISTDEIIPWLYEAQTPAD…
Eurotiomycetes	Aspergillus_brunneoviolaceus_CBS_621.78_CBS_621.78_GCA_003184695.1	SAT-KS-AT-PT-xCP-Te	MEGPYRVYLFGDQTSDFESGLRRLIQAKNNTIVQSFFQQSFYALRQEISKLPPAQRKIFPRCTSLIDLLARYRESGPSPVLESAFTCIYQLGSFINYYGDLGNAYPSEGCQLVGLCTGLLSCAAVSASRNVGELLPAAVEAVLVALRLGLCVLRVRELVDSEASASPWSLLVSGLGEESASSLIEEYSIKTAIPPSSRPYISAVGSNGVTISAPPLVLDAFIENGLAGNYKHTRVLIHGPYHAPHLYDSRDVDRILESFPEERLGHYTTHISVLSSNTGTPIGASKIKEVLQVAIEEILLRRLCWDKVTESCISIVESANSQSCQLIPISTSATQSLHTAFKKAGVANISLETGIGDVSATDKPNLSGKTECSKIAIIGMSGRFPDSESPEAFWEILQK…
Eurotiomycetes	Aspergillus_brunneoviolaceus_CBS_621.78_CBS_621.78_GCA_003184695.1	SAT-KS-AT-PT-xCP-xCP-Te	MEPRSRDILVVGDQSVDSTPFLVHALVKKPTPLLQAFLRDVQPLLRREIEGLPHGTRSLIPAFASLHELVEQYQRQGVHLASLDSALTCLAQFTHFIGVCEENPRAYLQPGTLIIGTCTGLLAASAIASSDSLIALIPLAVETVRLAFRLGATAARKAESLEASQTPWTSLVTGVDSTTVSVAVEEFNQTQGLRSSHRVYVSSVATNSVAVSGPPSLRARLFEASPLLQGVHHRTLPIHAPYHAPHLFAAESDILDAASIDILNRYHQIHTVCGFNTSSTRSTSALFTECIDRILRECMDWNQLVTASLNSLAPLNAPSYRILSLGPTPLGNALASALKHEQPAGLKLTLEDHASWLAANSVPAYLSSSPAGCNIAIIGMAGRFPDAADHEAFWELLAQ…
Eurotiomycetes	Aspergillus_brunneoviolaceus_CBS_621.78_CBS_621.78_GCA_003184695.1	SAT-KS-AT-xCP-MT-Red	MTCLNNHLSPQILLWGSLALSFNASTLEHLCAVLRQHEENFWLADVLKTLPHACRTVLASIPANIIHRATGDQALRLLRELEELFRGNRPIETAIPLPLPNSVLLPLVVIAQLAQYCQYRHQRGPEAKTTQTLGLCTGLLSAFAVSSSQSTEELHIHGAAAVRLGLLIGLMVDSQDASLGLGRFQSLSAAWSTPEGENELADIIRNFPHVLYNGWSPDSTDHAKLTYCGFPKAYISVYYDEKRATVTSAPQSIPALVRRLESAGIAVSEIGLYGRFHSADNEGLIDSLTTFCDCHAEFQLPDASTLRLVSRSNNSTAAILTDGSLHVHALRAILVESSQWYQAFSATVSANNHDKRVQVLDFGPERSIPPSLAVKGRLNMQVLYLPDQKTPSRTDQQPE…
Eurotiomycetes	Aspergillus_calidoustus_na_GCA_001511075.1	SAT-KS-AT-DH-xCP-xCP	MAHQAALIFGPQTTLPPPSLTSQLRAALLLNPRLYPLRKCIESLPAVWPVLVSADPALDQVPGVRALKDLTRWLSHGEFPPAKAISELPSAFVTPFTVILHIVQYLSYTDSKHGPGPRHEHVLESVRDQGGVQGFCSGLLAAVTVATSPDFEKVFRRAEVALRLAVGIGAYIDLDCVGSKISSIAIKSRPATPRNELQGYFDELESTYVSVVTDASSSTVTTPTPLLEAVTQKLKAQGFAMKQVDLRGRFHYPGHARAVETLRRLADSNPDFQLPHTDALLAPVYSNVNGKPFPEGPIGDTLIESILLQRCDWYSTMSAAFAGLTSEDATVVQFGPVECVPASLLRRARASVHRVTSIPGQEPSSSAIPATIERAGKAASEPIAIIGMACKVPGADSLE…
Eurotiomycetes	Aspergillus_calidoustus_na_GCA_001511075.1	SAT-KS-AT-DH-xCP-xCP	MPSSIPPLIIYGSQTIPPTAEILDQLASYLTRRQNTPELGPLVKAIRALPETWATLKTAEPRLQGLSDAPVLSLGQWLSATSSSSLHSDITSSSDSARDGHTNTYSRLAIPATLPNVLLAPLTVIIHIAQYSHYLDGLNLDVGLSGASPDPDAHVYIREGFAAACPAHTPDTGIGTASQFQGLCIGMLSAAVMECSATRTELGRNAAAAVRLAMCIGAYIDSERALAMSGSKSNCSLNSDSDVVCFIARWGVESGREIVEAILSRYSEAYISVELDRNCVTITVPDCDSRFLCRELNSHGVRVADIPVRGRYHSSKNEPLVRSLLELCSTDSASPFWVPWGVEKLECCLRSILTEQAGWFSEMSKTVSSLSHMSPMPMTVLELGLVSSFPPSLSVLPHL…
Eurotiomycetes	Aspergillus_calidoustus_na_GCA_001511075.1	SAT-KS-AT-PT-xCP	MKDDRQGTQLVFFGNEFPNDDLKGLFRNLLRAAKDRRFRHLANFLDESTLVLKREVAALPQSLKVLVPHFHSLLPLVEVDDFRQGPLGAAMESALLTVLELGMFIGHYEVEGGEWGLSEHTTTLAGLSIGLLAGAGVALSSNLAEIAQNGAECVRVSFRLGVYVNDVSRKLEAPQADGTLLSWAHVITGQTQPAIQDELSQCNSELGTPELLKVFISAADKTSVSISGPPSRIKAAYGASHLLRYSKSLPLPVYDGLCHATHLYSQDSINTVINSAESIIPANRPVRFALLSSNTGQPFVATNAGELFAAIGTELLTCTIYLDRITAGILDRVGGSKFKRCHIETFRTSIVFRGILSSLKADYPDLEIKLVDLIPWSMKDLEPRLPRSFADSKLAIVGM…
Eurotiomycetes	Aspergillus_calidoustus_na_GCA_001511075.1	SAT-KS-AT-PT-xCP	MRVLYFSNEFPKDDLQVLFRRLHNHSKHRRHPILARFIDEATLAVRDEVRHLPAALKALVPPFETVLSLVDHPDLRKGPFSGSMEGVLLCVLEISALIGHYEIAPEGFDLHALSTYVAGLGIGLLASAAVALAATLADVPATGAEVVRIAFRLGTLVDEVSQNLEPRDTSGSPDTWASVVPGAKLEEVQAELDAIHARERTPEPSKIFISSWSESAVTISGPPSRLKRVLRLSEFFRRHKVVGLPVYGGLCHAKHLYTEQDARDITATSSIGFVDRKYKPEIPIFQTSTGHQFAASTARDLLEQITLELLTRPIVWERVVQSLVDQAYTISAIDCEILVFHNSLPVNDLRAAFKSKLQEFEASTKELVPWIHETPEGTDPRGTRQSKIAIIGMSCRMPG…
Eurotiomycetes	Aspergillus_calidoustus_na_GCA_001511075.1	SAT-KS-AT-PT-xCP	MKLIFFSNKFPTEEPSDIFRQLRRQSRSDSHIILRQLLKETTLAVRDEIRLLPAELRSCLPPFRCILDLAEHYDWHRGPLSGTFECVFLCLSSLGLFVGDYEGRAHEFSFTQENTVVTGLGLGFLAATAVIASPSLSDFPHVAADVIRVAIRVGLVVYQTSQDLDPKGLDAPLRSWTTLVKGLGEEAIQRELEHFNESTGAIGPGRLYISVVEPDGSVFVNGPPSRMQTLFKGSGLLASAPRAPLPVYGGPCHASHLYDRSHVSWALQHVRADIAQRSCFGAARLLSMEDGQPLGANTVLELLENATQILLTSIIRWGRVVAALKEDLWQTGPQGEQSEEATTDLRIESCRSPPVVEGLGSTLREAHPDLSITAHDLAGWLSTVPTEHSKNGDDTKIAV…
Eurotiomycetes	Aspergillus_calidoustus_na_GCA_001511075.1	SAT-KS-AT-PT-xCP-xCP-Te	MDGSYHVYLFGDQTGDFEVGLRRLLQAKNHTVVSAFFQRSYHALRQEIASLPPAERSMFPRFTSIVDLLARHCESRGNSAMESALTCIYQLGCFINYHGDLGHAYPSSSKSHLIGLCTGLLSCAAVSSATNIGELITPAVEAVVVAFRLGLCVLRVRGLVDGEQAASLSWSALVSGINEAEGTDMIAKFSSEKAIPPSSRPYISAVCANTLTISGPPLVLDKFLDASLSKQHKAVRAPIHGPYHAAHMYDDRDVDRILDACNPDIVCKYNPHISILSSHTGKPMAVDTMKDFLRLALEEILLRQMCWDKVTDSCVSMLRSVGNHTSKRVFPVSTTATQSLMNSLKKAGQTDIEVDGSLGDISAEPQWHNATGKAELSKIAIIGMSGRFPEADSPQDFWN…
Eurotiomycetes	Aspergillus_calidoustus_na_GCA_001511075.1	SAT-KS-AT-PT-xCP-xCP-Te	MAILTELAKTSTGPPTWVILGALAVIAVYLKLFISSKRANLPIYSTHSGWLGSWHDSLDYLRDSPGVLKAGYERFSKHDLFYQLRTPVRWVIVVPPRFIDEIRTAPPTHLSAKVAANDVQQARYTVSPIVEADKFHFHLIKTHLTPNLEHKIVDLLDEINLAFDQEIGRPEDWKPVVMARTAHRIATRTANRLLVGAPLCRNEEYLQMSIRYTIDVFGGADKLRAWPDFLKRPVTYFVTSVNERQKVARKHLLPYIKTRLEGVKGIEKSSPRDKPVDSLQWVIDAAPNPLERDPERLMYRLLHLNVAAVHTTSVTFLNCVYDLALHADTHAELREEVQRAVSEDGWTARGLAGMRKLDSFMLESQRLAPIASSQMTRAVTKDFTFSDGTTVPKGSYVLV…
Eurotiomycetes	Aspergillus_calidoustus_na_GCA_001511075.1	SAT-KS-AT-xCP-Red	MQRPDSDTQGPSGTLLVFGPQSLTFDKRALARVRDDINASSHRVWIQDTLAGLATFWNELCNALPEVAGLLPAAEQHLHSFSRVLEHGLEESISTPSLPNIILTPLVVLTQLIEYERYLATRPQPNDTPSAIGFCTGLLAAYAVASSNTPIERSRYGAVAIRLATLIGALVDAEESRQANSGNTRSISHTVGWSTEEQEATVHEILSRRHPDVYMSVRYDRARCTLTSSGSAAAEVTRELREAGMSVTEVRLQGRFHDPGEARQGDVEGLVGLCARVPELQFAGSPTINLPGLTEGESLHERAIRGMLVQFCDWYGTLSSLPSPPKTVVCFGSEKCIPPTLTATLNPLYMHSTKRPEPQGFPGVDPANLIAVVGMAVKTAGADDVDEFAQMLRTGRAQH…
Eurotiomycetes	Aspergillus_campestris_LH_A408_GCA_037044165.1	A-xCP-KS-AT-DH-KR-xCP-Te	MSRLELIPNLLIRHARESGQRVAFAGPGWTISYGDLEKRTRRVAAHLVRAGIGRGDFVAVVLGRCLQTVESILAITRAGAVGVPLDPRSTSSELAKVLEHSGARVIITDGRHLATVRAAARERSLIILTTEVPDMGAMEEGYQIARYQDWIEDEERSTSDINIDDLGEDEQAFLHYTSGTTSLPKGVLSNQKSWLLNVDSLISAFELTPEDQFFWPLPLFHCIGHLLCIMGTVVVGASAYLPDADQTAFDSLRDTQARDTTLIVGAPTTFHDLVDAATRSDSTSLVSLPKLRACMYAGSSASVSLSSQVKELFGVPLLNNYGCTEGCGSVAVSRTDHLYRDNSSITILPHWDIKLVDLDRNPVNDGEQGEVWIGGPGLMLEYYKETQTPFTPDGWYPTG…
Eurotiomycetes	Aspergillus_campestris_LH_A408_GCA_037044165.1	SAT-KS-AT-PT-xCP	MTVYTPDSDTSSETSKMKLVYFSNEFPNDDLQDLLRRLYNHSKTKQHPVLAQFIDDATSAIRDEVRQLPASLKKLVPPFETVLNLADHADLRKGQLGGSVDGVLLCVLEIGTLIRYYEASPDQYDLAAVNTCLAGLGIGLLATAAVSLSQALTDLPLAGAEVVRVAFRLGVVVDEISQNLEPRDPSSPPSAWASVVPDVSAKDVQAELDTIHANEKTPEPSHVFISALNQTSVTVSGPPSRLKRIFRLSEFFRGRKIVNLPVYGGLCHAGHIYKDEHVQAVINTQTVDSLDEKLCPGIPIFSTSTGRPYTARSARGLFKQIIAEIMTKRIEWDRVVEGMLEYANNTSASECQIYVFRMSLPMHDLLSAASTTIPDMATSTEELIPWVSKADTNTSGTPR…
Eurotiomycetes	Aspergillus_campestris_LH_A408_GCA_037044165.1	SAT-KS-AT-PT-xCP-xCP-Te	MNRQVDCPYRVAFFGGQGSRTIFARDVCNAVIQQTRRSATASTLLDSCYQAFLDELSSAKEESTGHFCQVLMELTEVMEPGNLLSPPIGLQTNPIIEGISLLVHQLLAYLRTMHTGGLWNNPEGCVNEAERQWDEIIGFCSGVLPAVVVATSNSTEDFLQGSEQAVRLAFWLGYRVSLFSEEVAGDQWRASPWTMALNGITEQDAADFNAEKGGDLSNRVCWAAQLGDNRATITGTASALQAFSATRQAHADSIPVHGWYHGGEATESVVTQLLQDLSRRSISINPSRSLVIPLRSAVDGAVLTESGGGVLVEYAVRAILTYSLDWQKTWQSINQNPKKVEVHAIGPYSRSFFRNRTDNVHLVDCFKPDDKVTAPDDIAIVGMSVNFPGASDKESLWAN…
Eurotiomycetes	Aspergillus_campestris_LH_A408_GCA_037044165.1	SAT-KS-AT-xCP-MT-Red	MAVANHEETEATTVLLFGPQALSFTEESFQRIRVALSDSANAWMRQVVEELPDCTSRVAEQFPKLQATPAARLQDSLREWLKIDEGTAPAASKSLPNALLTPLVVLDQLAQYSQYVQLAHTETGHGADRYGPRSRPTRNVGFCTGLLSALAVSSASNQVEFREYAAVAVRLAAVIGALVDAEDAIGSCGESKTFSAAYHSPQQASELQSILQEFPEAYISVNYDEGRATITTSNSTAQAFQQRLRNAGITAQAIGLRGRFHYRGYQEDLARLIEICDTMPELSLPDVTDTVSPIHSLSGGGLITEGRLHHIALREILVEQSQWGKTFDAVSRSSLANPHSLLVPFGFEKCVPPTAMPRVGGQIVYMTDQHDVRSRLSAVQKPGETVSEDEIAVVGMAVK…
Eurotiomycetes	Aspergillus_chevalieri_JCM_23047_GCA_001599875.1	SAT-KS-AT-DH-xCP-xCP-MT	MEAPMGARPISLLFGPQSTLTSESISQIRATILQDPTLHFLHDVLKDLSLLWASITNAWPALISLPGETYLIELGRFFQEGGDPPAFSETSNIIWAPLAVVSQVIDFWKTKDHIKCFHSSESPTERPPLIDVQGFCIGSLTAAATACSHNTEEFKSFSSKAVHLAVCIGAAVDFDALDTSFRGYSIAIRWRSDLEYQCLEDLLGYYHRAYISCVTDTDRVTVTVNEDILAPLMNAVAERGISVRLLGLRGRYHHDDHESSVQRIASLCESDPRFALPDAQCLALPLRSTVNGAVITNGSLHTALLEAILTEQSQWHLTVSAVLEDARSKNVHMHFIPIGAGSFVPPSILRNEASRAPARPKIDNGCASTYPIPIDPVLTPSDTSSEGAEGSKFPVAIIG…
Eurotiomycetes	Aspergillus_chevalieri_JCM_23047_GCA_001599875.1	SAT-KS-AT-PT-xCP	MDTPSSSADVVNDHHYRLVYFSNELPSDEQIGAHLRRLQALSKDRRHPILKVFLDDATEVLREELRKLPSYLLSLIAPFESIIDFAYQFGLRTGPFGGSTEGVSTCLIQLGTYISYHECPTNEPLTSPHGTLVALGSGLLAAAAVSFASRLPDLVKLGSEAIRIAFRMGLRVDQASQRLETRRAEGPAESWAYVFSELSEDEVQKELATMNASLNFPAPSQIFVSAVSPGSVTISGPPSRLKTLVRSSELLRYAKWASLPIFNGLCHTSHAYTHADAEDIVSAMDLPTNSSYIPHAPLLSTRNGQPFAAHTPAQLFEDVIFELLTGTIRWDTVTATLHDRVALHFVPEVVVKALGAPNALKGFNEAVQAHADPVRVTTEDVLAQSLATPLPVRAPRDPK…
Eurotiomycetes	Aspergillus_chevalieri_JCM_23047_GCA_001599875.1	SAT-KS-AT-PT-xCP-xCP-Te	MEGLRRVYLFGDQTGDFDAGLRRLLHVKNNSLVTAFFQKCFYALRQQITRLPPSQRQIFPRFTSIIDLLARYRESGVNPALESALTCIYELGCFISYYGDLGHAYPSGSDSAIIGLCTGLLPSTAVSCSKTVGELIPVAVETVVLALRLGLCVHSVRKLVDRGTSSSSSWSALVSGISEGEALDKIREFSSQKAIPPSSQPYVSAVSTNGVTISAPPSTLDQLIQTSLSKDHKPVRAPIHGPYHAAHLYDKRDVERVLESWPKDTFSSYVPQIPVLSSNTGSSIEAETIDALLRASVDEILLRQLCWDKVTGSCVSRLKGTACSICTLVPISSSAIQSLHTTLKKAGITNLDVNSALGDIPNEPNGLSTTGRSEHSKIAIIGYSGRFPEATDPEKFWDL…
Eurotiomycetes	Aspergillus_chevalieri_JCM_23047_GCA_001599875.1	SAT-KS-AT-PT-xCP-xCP-Te	MASSEVFIFGDQTVAFEPTLHRLLHVKDDVLLSDFFDRVGFQLRRYVSSLPAHQQAWFPLFTTLLDLFAQHEKVYSVPALKFALLCATEIGQFIRHLVQTTRPYPVAASTYLVGACTGSFPAAAISTSQTLSELLPAAVEAVLVSLKLGLHSLIVRYDIEASVPGQPKSWSALVDVEVTEAADKITAYNADKASNLPLILTWEFHDQSLQGYKQRTKVVSIASGNVLDSYSFKALLREAVLGALTEPMCWDSVVSSLTSNMQQREVTNCTIYQVSSISGPFISSGLPETLDVKVNTIDSIREGPLPDTGFNTTGKFSQSNIAIIGYSGRYPDSASNEEFWDLILAGRDVHRTIPEDRFDWEAHYDPTGKRKNTSRVKYGCFIKEPGVFDAPFFNMSPRE…
Eurotiomycetes	Aspergillus_chevalieri_M1_GCA_016861735.1	SAT-KS-AT-DH-xCP-xCP-MT	MEAPMGARPISLLFGPQSTLTSESISQIRATILQDPTLHFLHDVLKDLSLLWASITNAWPALISLPGETYLIELGRFFQEGGDPPAFSETSNIIWAPLAVVSQVIDFWKTKDHIKCFHSSESPTERPPLIDVQGFCIGSLTAAATACSHNTEEFKSFSSKAVHLAVCIGAAVDFDALDTSFRGYSIAIRWRSDLEYQCLEDLLGYYHRAYISCVTDTDRVTVTVNEDILAPLMNAVAERGISVRLLGLRGRYHHDNHESSVQRIASLCESDPRFAFPDAQCLALPLRSTVNGAVITNGSLHTALLEAILTEQSQWHLTVSAVLEDARSKNVHMHFIPIGAGSFVPPSILRNEASRAPARPKIDNGCASTYPIPIDPVLTPSDTSSEGAEGSKFPVAIIG…
Eurotiomycetes	Aspergillus_chevalieri_M1_GCA_016861735.1	SAT-KS-AT-PT-xCP	MDTPSSSADVVNDHHYRLVYFSNELPSDEQIGAHLRRLQALSKDRRHPILKVFLDDATEVLREELRKLPSHLLSLIAPFESIIDFAYQFGLRTGPFGGSTEGVSTCLIQLGTYISYHECPTNEPLTSPHGTLVALGSGLLAAAAVSFASRLPDLVKLGSEAIRIAFRMGLRVDQASQRLETRRAEGPAESWAYVFSELSEDEVQKELATMNASLNFPAPSQIFVSAVSPGSVTISGPPSRLKTLVRSSELLRYAKWASLPIFNGLCHTSHAYTHADAEDIVSAMDLPTNSSYIPHAPLLSTRNGQPFAAHTPAQLFEDVIFELLTGTIRWDTVTATLHDRVALHFVPEVVVKALGAPNALKGFNEAVQAHADPVRVITEDVLAQSLATPLPVRAPRDPK…
Eurotiomycetes	Aspergillus_chevalieri_M1_GCA_016861735.1	SAT-KS-AT-PT-xCP-xCP-Te	MASSEVFIFGDQTVAFEPTLHRLLHVKDDVLLSDFFDRVGFQLRRYVSSLPAHQQAWFPLFTTLLDLFAQHEKVYSVPALKFALLCATEIGQFIRHLVQTTRPYPVAASTYLVGACTGSFPAAAISTSQTLSELLPAAVEAVLVSLKLGLHSLIVRYDIEASVPGQPKSWSALVDVEVTEAADKITAYNADKASNLPLILTWEFHDQSLQGYKQRTKVVSIASGNVLDSYSFKALLREAVLGALTEPMCWDSVVSSLTSNMQQREVTNCTIYQVSSISGPFISSGLPETLDVKVNTIDSIREGPFPDTGFNTTGKFSQSNIAIIGYSGRYPDSASNEEFWDLILAGRDVHRTIPEDRFDWEAHYDPTGKRKNTSRVKYGCFIKEPGVFDAPFFNMSPRE…
Eurotiomycetes	Aspergillus_chevalieri_M1_GCA_016861735.1	SAT-KS-AT-PT-xCP-xCP-Te	MEGLRRVYLFGDQTGDFDAGLRRLLHVKNNSLVTAFFQKCFYALRQQITRLPPSQRQIFPRFTSIIDLLARYRESGVNPALESALTCIYELGCFISYYGDLGHAYPSGSDSAIIGLCTGLLPSTAVSCSKTVGELIPVAVETVVLALRLGLCVHSVRKLVDRGTSSSSSWSALVSGISEGEALDKIREFSSQKAIPPSSQPYVSAVSTNGVTISAPPSTLDQLIQTSLSKDHKPVRAPIHGPYHAAHLYDKRDVERVLESWPKDTFSSYVPQIPVLSSNTGSSIEAETIDALLRASVDEILLRQLCWDKVTGSCVSRLKGTACSICTLVPISSSAIQSLHTTLKKAGITNLDVNSALGDIPNEPNGLSTTGRSEHSKIAIIGYSGRFPEATDPEKFWDL…
Eurotiomycetes	Aspergillus_chevalieri_M1_GCA_016861735.1	SAT-KS-AT-xCP-xCP-MT-Red	MTQSTNTVLLFGPQALSFEQESFHQIRSTLLSTSQYNWILGVVAELPNLFSRAKEKLPKVKSTSGAKLLDDLNDWLRSGVINESSFQLPNILLSPLIIIVHLIEYSQYQQLSSGSENGHKETIGFCTGFLSALAVSSSDSQVKFKQYGSVAIRLAMLIGAVVDAEDAVGEHGENKSLATAWNSPELKGELTRVLDSIPEAYISVSYDENRATVTTSTSTIATLQQQLRAANIIATQIDLRGRFHSTAYEKELDALIEFTDSETSLQFPPASSLVLSTWANGGEIIKDDKPHHAALRSILLDHSQWFQTFSAVQSSKLSSSTDTVVSFGPERCIPPSILRRIPAEVIHFAERNPTTRQSDNDIAVVGIACNVAGASDLEEFWNLLCEGKSQHQPVPAERF…
Eurotiomycetes	Aspergillus_clavatus_NRRL_1_NRRL_1_GCA_000002715.1	SAT-KS-AT-PT-xCP	MRLFFFSNKFPPDDLQELFRRLRLYSQSPEHVVLRRLLDETTQVVREEIRRLPAELRSLIPPFQSILDLAESHNWHKGPLCGTFECIFLCLIPLCLFVGNYESRPERFGFHAQDSLFTGLGLGFLAATAIVASPSLLDVPVTAAEVIRVAMRAGILLYQKSQDIEPQSVKSPLESWATLVKGLDEETVQEELEMFNTSTGSPQCSKVYISVVEPDGSVFVNGPPSRLRQFFNTPGKVQSAPRAPLPVYGGPCHAAHLYDRTHTYVLSMGDGRPLKGETVQELLESATHVLLTSVIRWGSVLHAAAKFPYWRDDMELQLETFRPSTPVVHGLLSSVQTAFPECTVGVEDLVEWIFDNRNIPSLTANDTKIAVVGMSCRLPGGADDLQRFWELLEDGRDVH…
Eurotiomycetes	Aspergillus_clavatus_NRRL_1_NRRL_1_GCA_000002715.1	SAT-KS-AT-PT-xCP-xCP-Te	MMEDLRRVYLFGDQTISCDEGLRNLLQAKNHTIVASFFERCFHALRREISKLPPSQRSLFPRFTSIADLLARHRESGTNPALGSALTCIHQLGCFIDYHGDRGHPYPSAEDSLLLGSCTGLLSCAAVSSCRNVGELLPLAVEVVAMAIHLGLCVMTVRDLVDSSSSSTGSWSVLVSDLNEEDAINRIAQFHEKRGINPSSRPYISAVGSKGLTISAPPEILDEFIEEALPKECKHFKAPGVHGPYHAPHLYNEREIQSMLDSCSDMISNYAPHISLLSSNTGKTVQAQSTRDLLKVALEEILVRRICWDKVTESCLSIVQSTPGKLWKILPIASSATQGLATALQRVGNCRVEVDTGVGAPQMDPAALNQTGNTSRSKIAIIGMSGRFPEADGVEAFWD…
Eurotiomycetes	Aspergillus_clavatus_NRRL_1_NRRL_1_GCA_000002715.1	SAT-KS-AT-xCP-MT-Red	MTMNSHHKPKVFLFGPQALALDVSFFRQLSLHLHADPHGKWALSTVSELPQLWETLISSIPKLQHFSGAQLLQDLDQGLQTGDISPSLFPLPNTLLSPLVVIAQLTQYVDLITAALPNLGENDKFPASITESSETLGLCTGILSAFAVSSSSNLAELYKNGAVAVRLAMLAGALVDAEQASPDSNGVATSVSVSWNGAETKASLYGVLEKCPAAYISVYVDEKRSTVTLPQQEAADLIQQMKSLGLHVSEVPLSGRFHWPGHAEEAEQLIALCKSHDILQFPESSKIILPSVLASGASLHEIALREILIRPSHWLETFTSVYTTHVEVGGATFICLGPERCVPPTMTRKLGTQLVQVSEIDPAASSLPAQLVGQHMDDLPDDRVAVIGMACLVPGADDL…
Eurotiomycetes	Aspergillus_costaricaensis_CBS_115574_CBS_115574_GCA_003184835.1	A-xCP-KS-AT-xCP	MIPENDFNLTDDPSKLGHNVVSLFNQIQTRYSPKPAIVCGDHTITYGALASESDGLACLLLSRGISRGHVVALALDRTPDLIMFILGVLKAGAIYVPVDPALPPERVNQMLDDEALRLVIVSPASTKGGTGTSRYDYGHKAACCTTSELRDQMRYQADKKPAVDIQADDIAYILYTSGSTGKPKGVEIHHAAICNYALSVHQRPGCTGQDRVLFKSTISFDMAAFEIYVPLLCGATVVQAQAHEIGDPRALIYLLDRHSVTFSVATPTILQMLLDSGWSGTPGFSRLVTGGEALSPRLAERLTACVDEVWNLYGPTETTASVAAWKVQVREDILIGTPNPNTRLYVLDTDMQPVPVGSTGELYISGAGVARGYRNNPERTKAAFLPDPFWEGHTMYKSG…
Eurotiomycetes	Aspergillus_costaricaensis_CBS_115574_CBS_115574_GCA_003184835.1	ER-KS-AT-DH-MT-KR-xCP	MTDVEAFNNPRVQRALVIENTGNLAVRDDVPVPDLKNGCVLVKIDFVGLNPFDAKIIDYSPIGGSTPGIEFAGRVYALGISATHTLQVGTAVCGIMPEPISMVPTHGAFAEFITIPPEYLIKIPTHMPMEAAAAIPVGSMTAGLALYQTLNLPWPQQRRDSSPYVLVYGGSTTTGSMAIQFLKLSGCIPLTVCSPHNFSLVHSRGAAKAFDRHSSQCAAEISEYTAGNLHYVLDCISEEGSFDLCRDAMGTGGGQYVAVNPIPDHQIVNKDIEYSMVVCSTISGTPSELPRYWSLDARPADHEFAIRWCQAVETMLANSKIQPHPILVHRKDGLVGILDGLRMLRTGKISGQKLVYGVSTRKLSNANHTRGPTITPRLCPHILHEKGTVIGSSCRFPGG…
Eurotiomycetes	Aspergillus_costaricaensis_CBS_115574_CBS_115574_GCA_003184835.1	KR-KS-AT-DH-xCP-xCP-MT-Te	METFNGIPALYSLLERWQQLTAATTGWWLLWAGGLTLILGLLQLARTWWSLRHIPGPFLASISNLPRVWWQITGRAHLYHQAAHAKYGDVVRIGPRMVSFSNPEAIPTVYPVRPGFPKGDLYSALRPYTSERGPIYLVFNTQDESMHKLIKSPIAPLFSLSSVVQFEGLVDEVLAVLSKQLDERFVATGETFDCADWLHFFSFDVMGTLSFSKQYGALEQGRDVNGMLSEVYRFFQLAAPMTQITWLDPILYKNRLMHTLRKLQKKTPSMSILDFASRAIKERMAKEGNDKEDPNTPPRRKDFLDRFLEIHRQSSKLPPWASTAWTFSNIIAGSDSVGTVMKTAVCEFDPHGPREAVKIAIVLRLQCELDGANLTRPYPLWEQVRDLPYLDACIQEAAR…
Eurotiomycetes	Aspergillus_costaricaensis_CBS_115574_CBS_115574_GCA_003184835.1	SAT-KS-AT-PT-xCP	MSAPTKLVFFGNEFPNDDLKTLFRGLHRHGKDRRFRQLATFLEESTRVLQNEVAQLPEPLKKLVPHFENLMPLTEVDFRQGPLGAAMESALLTILELGMFIGHYEAEERVWDLSADRTTLAGLSIGLLAAAGVALSTHLAEVVQNGAECVRVSFRLGVYVHDISRKLEAPQADGSLLSWAHVVTGETASDLQEELSRYNTETGTPELLKVFISAADKTSVSVSGPPSRIRAAFRASQRLRYSKSLALPVYDGLCHAAHLYDEETIHRVLHPSGSVIPTSRPVQLALLSSRSGQPFEATTAAELFRAISTELLTGTIFLDNITAGILDRTERCADATQCQIETYRTSLVFKGLLKALEACFPDRTIKTTDLIPWVFQDYGARQPKSYADSKLAIVGMACR…
Eurotiomycetes	Aspergillus_costaricaensis_CBS_115574_CBS_115574_GCA_003184835.1	SAT-KS-AT-PT-xCP	MAVTTAMRLFFFSNRFPTDNLPDVFRNLRMHSELPGHVILRQFFKETTQVVREEIHRLPPELRSLIPPFQSILDLAENYNWHKGPLCGAFECIFLCLVHLGLFIGSYESRPHEFIFDAQGALFTGLGLGSLAATAVVASRSLLDVPTTAAEVIRIAMRSGILLYQKSQDLEQLPLDSSRESWTTVVRGLDEKTVQEELEMFNRSMNIPQSAKVYISVVEPDGSVFVSGPPSRLREFFNKPGKVQSAPRAPLPVYGGPCHAAHLYDRTHAAWVVREVNSGIASRCLSGHPLLLSMGNGQSLAGETAGELFESATYVLLTSIIRWGDVLEGVKGFPHWKDNMKLRVETFKSPSPAVHGLLSAIQSGYPESTVSLDDLDQWIIDNNLEQSSNPMDSKIAVVG…
Eurotiomycetes	Aspergillus_costaricaensis_CBS_115574_CBS_115574_GCA_003184835.1	SAT-KS-AT-PT-xCP	MGQSSEPDGQDSTHYIPTPKLVYFGNEFPNDDVNELFRRLQQHSKDRRFRLLSAYLEDSILVLQDEIAKLPHSVNSRVPHFDNIVTLSENGYLRELGLGAAMESAFLLILQLGSFIGHHEATDSDFDLPKDVTIVAGLSVGLFSAAAIALSDSLAEVIKNGAECLRVSFRLGVYVGDFSSKLEAPQPEGALASWAYVVTGMDRDSVQSELTRVNQDLGNPEMSKVFISAADNSSVSVSGPPSRIKAAFLHSSDLRYSKSLALPVYDGLCHANHIYSQDDVNAVLNVPMSLIPTTRPLRLSVISSRTGKPFTATTASGLLSEIATELITGTIYLDNIIKGIQHHIGAFSGAKTCHIDSFRTSIIFKSILDAIAEDHPRVSIRKNDLVDWVHKDFGPRLRN…
Eurotiomycetes	Aspergillus_costaricaensis_CBS_115574_CBS_115574_GCA_003184835.1	SAT-KS-AT-PT-xCP-xCP-Te	MEGPSRVYLFGDQTSDIEAGLRRLLQAKNSTIVQSFFQQCFHAIRQEIAKLSPSQRKLFPRFTSIVDLLSRSRESGPSPVLESALTCIYQLGCFIHFYGDLGHDYPTPSNSHLVGLCTGVLSCTAVSCARNVGELIPAAVEAIVIALRLGICVFRVRELVASADSESTCWSALVSGISEAEASRLIDEYSSKKATPPSSKPYISAVSSNGVTVSAPPTILDEFVETCISKNYKPVKAPIHGPYHAPHLYDDKDIERILHQSSALEELTGWSPAIPVISSNTGKPIKATSIKDLFKVALEEILLRRLCWDKVTESCTSVCKTGKNHSCKLFPISSSATQSLFTVLKKAGVSISLETGVGEIAINPETRNLTGKAENSKIAIIGMSGRFPESDGTEAFWDL…
Eurotiomycetes	Aspergillus_costaricaensis_CBS_115574_CBS_115574_GCA_003184835.1	SAT-KS-AT-PT-xCP-xCP-Te	MSKMETVAEVFIFGDQTVAFESTLHSLLHLKDNAVLTDFFDRVGYQLRRYVGNLLLHQQEWFPYFTTLIDLLAQHENCHAAPALKLPLLCATELGQFIRHYGQAGRTYPAPESTFLIGACTGAFAAAAVATSQTLAELVPAAVEAVTVAFRTALRSLILRNDLEINIDGSQKSWSAIVGVCEPEAASAIRCFNVEKGLPPVARLYLSSVSRTNVSISGPPRLLGQFLLSCAWKHSLLPIELPYHASHLFRKDDAESIVGEFHDFSLLKYTQRTKVICAVSGEVVVASDLRSLLHRAVQEALCEPLQWNFIAASLSQELKQCQFTVCVINQVSTRSGSLISSALSQEAFLGVKIVQSIGDVAVSPALSSPTGKFSQSSIAIIGFSGRFPESGSNEEFWEM…
Eurotiomycetes	Aspergillus_costaricensis_FKII_L6_BK_DRAB1_GCA_022814465.1	A-xCP-KS-AT-xCP	MVPENEFNLTDDPSKLGHNVVSLFEQIQSRYSPKPAIVCGDHTITYGVLASESDRLACLLLSRGISRGHVVALALDRTPDLIIFILGVLKAGAAYVPIDPALPSERVNQMLDDEALRLVIVSHASTKGMTSNCRCDYGHKAACCTTSELRDQMRYQADKKPAVDIQGDDLAYILYTSGSTGKPKGVEVHHAAICNYALSVHQRPGCTDQDRVLFRSTISFDMSAIEIYVPLLCGATVVQAQTYEIRDPRALIHLINHHAVTFAVTTPTILQMLLDSGWCGTPGLSKLLTGGEALSPRLAERLTACVEEVWNIYGPTETTMSVATWKVQVGEDILIGTPKANIRLYVLDADMRPVPVGGTGELYISGAGVARGYRNNPERTKAVFLPDPFWEGHTMYKSG…
Eurotiomycetes	Aspergillus_costaricensis_FKII_L6_BK_DRAB1_GCA_022814465.1	KR-KS-AT-DH-xCP-xCP-MT-Te	METFNEIPALNAILARWQQLTAATTGWWLLWAGGLTLILGLLQLARTWWSLRHIPGPFLASISNLPRVWWQITGRAHLYHQAAHAKYGDVVRIGPRMVSFSNPEAIPTVYPVRPGFPKGDLYSALRPYTSERGPIYLVFNTQDESMHKLIKSPIAPLFSLSSVVQFEGLVDEVLAVLSKQLDERFVATGETFDCADWLHFFSFDVMGTLSFSKQYGALEQGRDVNGMLSEVYRFFQLAAPMTQITWLDPILYKNRLVHTLRKLQKKTPSMSILDFASRAIKERIAKEDNGKEDPNFPPRRKDFLDRFLEIHSQSSKLPPWASTAWTFSNIIAGSDSVGTVMKTAVCEFVNLLSHPDSLEKLQRELDGANLTRPYPLWEQVRDLPYLDACIQEAARVHPP…
Eurotiomycetes	Aspergillus_costaricensis_FKII_L6_BK_DRAB1_GCA_022814465.1	KR-KS-AT-DH-xCP-xCP-MT-Te	MANDELIHKLTWSPAALSKEPLSIAHVVFVVAEKESESLSAYQAQLANEGITTVVTDDAMKINPLITPKTIVVYIPPTAKSKEEIYAAATQACTSLINVAQQLYHRSISAKSKTVKLFSIVPKDWGIGDLVYAPLHGLSRVLKTEIPEIMAALKYAQGFDFVRICEGEAQVAYLQPFTDELSDKKELQLHANSSYLITGGTGGIGLATAAWLAQRGARNIVLVSRRGLPPSSDSKAVEANSADLISRIAKLKAVGVSVHVLAVDISKPNADVTLSQTINDLDIPPIKGVIHAAGTAGYHTLTRCTPTDIADNLAPKVIGSLNLDALFPPGTLDFFVFTSSVGQLVGFPGQLAYAPSNAFLDALAAHRRRQGDNSMAILWAGWQGTGVWDQSKSAMRRLN…
Eurotiomycetes	Aspergillus_costaricensis_FKII_L6_BK_DRAB1_GCA_022814465.1	SAT-KS-AT-PT-xCP	MSAPTKLVFFGNEFPNDDLKTLFRGLHRHSKDRRFRQLATFLEESTRVLQNEVAQLPEPLKKLVPHFENLMPLTEVDFRQGPLGAAMESALLTILELGMFIGHYEAEERAWDLSADRTTLAGLSIGLLAAAGVALSTHLAEVVQNGAECVRVSFRLGVYVHDISRKLEAPQADGSLLSWAHVVTGESASDLQEELSRYNTETGTPELLKVFISAADKTSVSVSGPPSRIRAAFRASQRLRYSKSLALPVYDGLCHAAHLYDEETIHRVLHPDGSVIPTSRPVQLALLSSRSGQPFEATTAAELFRAISTELLTGTIFLDNITAGILDRTERCADTTKCQIETYRTSLVFKGLLKALEACFPDRTISTTDLIPWVFQDYGARQPKSCADSKLAIVGMACR…
Eurotiomycetes	Aspergillus_costaricensis_FKII_L6_BK_DRAB1_GCA_022814465.1	SAT-KS-AT-PT-xCP-xCP-Te	MSKMETVAEVFIFGDQTVAFESTLHSLLHVKDNAVLTDFFDRVGYQLRRYVGNLPLHQQEWFPYFTTLIDLLAQHENCHAAPALKLPLLCATELGQFIRHYGQAGRTYPAPESTFLIGACTGAFAAAAVATSQTLAELVPAAVEAVTVAFRTALRSLILRNDLELNIDGSQKSWSAIVGVCEPEAASAIRCFNVEKGLPPIARLYLSSVSRTNVSISGPPRLLGQFLLSCAWKHSLLPIELPYHASHLFRKDDVEIIVGDFHDFSLLKYTQRTKVICAVSGEVVVASDLRSLLHRAVQEALCEPLQWNCIAASLSRELKQCQLTECVINQVSTRSGSLISSALSQEAFLGVKIVQSIGDVAVSPALSSPTGKFSQSSIAIIGFSGRFPESDSNEEFWEM…
Eurotiomycetes	Aspergillus_costaricensis_FKII_L6_BK_DRAB1_GCA_022814465.1	SAT-KS-AT-PT-xCP-xCP-Te	MEGPSRVYLFGDQTSDIEAGLRRLLQAKNSTIVQSFFQQCFHAIRQEIAKLPPSQRKLFPRFTSIVDLLSRSRESGPSPVLESALTCIYQLGCFIHFYGDLGHDYPTPSNSHLVGLCTGLLSCTAVSSARNVGELIPVAVEAIVIALRLGICVFRVRELVASADSESTCWSALVSGISEAEASRLIDEYSSKKATPPSSKPYISAVSSNGVTVSAPPTVLDEFVETCISKNYKPVKAPIHGPYHAPHLYDDKDIERILQQSSALEELTGWSPAIPVISSNTGKPIKAKSLKDLFKVALEEILLRRLCWDKVTESCTSVCKAGPNHSCKLFPISSSATQSLFTVLKKAGVSISLETGVGEIAINPETRNLTGKAENSKIAIIGMSGRFPESDGTEAFWDL…
Eurotiomycetes	Aspergillus_costaricensis_LH_A159_GCA_037044335.1	A-xCP-KS-AT-xCP	MVPENEFNLTDDPSKLGHNVVSLFEQIQSRYSPKPAIVCGDHTITYGVLASESDRLACLLLSRGISRGHVVALALDRTPDLIIFILGVLKAGAAYVPIDPALPSERVNQMLDDEALRLVIVSHASTKGMTSNCRCDYGHKAACCTTSELRDQMRYQADKKPAVDIQGDDLAYILYTSGSTGKPKGVEVHHAAICNYALSVHQRPGCTDQDRVLFRSTISFDMSAIEIYVPLLCGATVVQAQTYEIRDPRALIHLINHHAVTFAVTTPTILQMLLDSGWCGTPGLSKLLTGGEALSPRLAERLTACVEEVWNIYGPTETTMSVATWKVQVGEDILIGTPKANIRLYVLDADMRPVPVGGTGELYISGAGVARGYRNNPERTKAAFLPDPFWEGHTMYKSG…
Eurotiomycetes	Aspergillus_costaricensis_LH_A159_GCA_037044335.1	KR-KS-AT-DH-xCP-xCP-MT-Te	MANDELIHKLTWSPTALSKEPLSIAHVVFVVAEKESESLSAYQAQLANEGITTVVTDDAMKINPLITPKTIVVYIPPTAKSKEEIYAAATQACTSLINVAQQLYHRSISAKSKTVKLFSIVPKDWGIGDLVYAPLHGLSRVLKTEIPEIMAALKYAQGFDVVRICEGEAQVAYLQPFTDELSDKKELQLHANSSYLITGGTGGIGLATAAWLAQRGARNIVLVSRRGLPPSSDSKAVEANSADLISRIAKLKAVGVSVHVLAVDISKPNADVTLSQTINDLDIPPIKGVIHAAGTAGYHTLTRCTPTDIADNLAPKVIGSLNLDALFPPGTLDFFVFTSSVGQLVGFPGQLAYAPSNAFLDALAAHRRRQGDNSMAILWAGWQGTGVWDQSKSAMRRLN…
Eurotiomycetes	Aspergillus_costaricensis_LH_A159_GCA_037044335.1	SAT-KS-AT-PT-xCP	MSAPTKLVFFGNEFPNDDLKTLFRGLHRHSKDRRFRQLATFLEESTRVLQNEVAQLPEPLKKLVPHFENLMPLTEVDFRQGPLGAAMESALLTILELGMFIGHYEAEERAWDLSADRTTLAGLSIGLLAAAGVALSTHLAEVVQNGAECVRVSFRLGVYVHDISRKLEAPQADGSLLSWAHVVTGESASDLQEELSRYNTETGTPELLKVFISAADKTSVSVSGPPSRIRAAFRASQRLRYSKSLALPVYDGLCHAAHLYDEETIHRVLHPDGSVIPTSRPVQLALLSSRSGQPFEATTAAELFRAISTELLTGTIFLDNITAGILDRTERCADTTKCQIETYRTSLVFKGLLKALEACFPDRTISTTDLIPWVFQDYGARQPKSCADSKLAIVGMACR…
Eurotiomycetes	Aspergillus_costaricensis_LH_A159_GCA_037044335.1	SAT-KS-AT-PT-xCP-xCP-Te	MSKMETVAEVFIFGDQTVAFESTLHSLLHVKDNAVLTDFFDRVGYQLRRYVGNLPLHQQEWFPYFTTLIDLLAQHENCHAAPALKLPLLCATELGQFIRHYGQAGRTYPAPESTFLIGACTGAFAAAAVATSQTLAELVPAAVEAVTVAFRTALRSLILRNDLELNIDGSQKSWSAIVGVCEPEAASAIRCFNVEKGLPPIARLYLSSVSRTNVSISGPPRLLGQFLLSCAWKHSLLPIELPYHASHLFRKDDVEIIVGDFHDFSLLKYTQRTKVICAVSGEVVVASDLRSLLHRAVQEALCEPLQWNCIAASLSRELKQCQLTECVINQVSTRSGSLISSALSQEAFLGVKIVQSIGDVAVSPALSSPTGKFSQSSIAIIGFSGRFPESDSNEEFWEM…
Eurotiomycetes	Aspergillus_costaricensis_LH_A159_GCA_037044335.1	SAT-KS-AT-PT-xCP-xCP-Te	MEGPSRVYLFGDQTSDIEAGLRRLLQAKNSTIVQSFFQQCFHAIRQEIAKLPPSQRKLFPRFTSIVDLLSRSRESGPSPVLESALTCIYQLGCFIHFYGDLGHDYPTPSNSHLVGLCTGVLSCTAVSCAKNVGELIPAAVEAIVIALRLGICVFRVRELVASADSESTCWSALVSGISEAEASRLIDEYSSKKATPPSSKPYISAVSSNGVTVSAPPTILDEFVETCISKNYKPVKAPIHGPYHAPHLYDDKDIERILHQSSALEELTGWSPAIPVISSNTGKPIKATSIKDLFKVALEEILLRRLCWDKVTESCTSVCKTCKNHSCKLFPISSSATQSLFTVLKKAGVSISLETGVGEIAINPETRNLTGKAENSKIAIIGMSGRFPESDGTEAFWDL…
Eurotiomycetes	Aspergillus_cristatus_2e_GCA_034509305.1	SAT-KS-AT-DH-xCP-xCP-MT	MEAPMGERPISLLFGSQSTLTSESISQIRATILQDPALRFLHDVLKDLSLLWTSITNAWPALISLPGETYLIELGRFFQEGGDPPAFSETSNIIWAPLAVVSQIIDFWKTKDHIKCFHFSESPTERPPLIDVQGFCIGSLTAAATACSHNTEEFKSLSFKAVHLAVCIGAAVDFDALDTSFRGYSITIRWRSDLEYQYLEDLLDYYHRAYISCVTDTDRVTVTVNEDILAPLMNAVAERGISVRLLELRGRYHHDDHESSVQRIASICESDPRFAFPDAQCLALPLRSTVNGAIITNGSLHTALLEAILTERSQWHLIVSAVLEDARSKNVHMHFIPIGAGSFVPPSVLRNEASRAPACPKIDNGCASTYPIPIDPVLTPSDTSSEGAEGSKFPVAIIG…
Eurotiomycetes	Aspergillus_cristatus_2e_GCA_034509305.1	SAT-KS-AT-PT-xCP	MDTPSSSADVVNDHHYRLVYFSNELPSDEQIGAHLRRLQALSKDRRHPILKVFLDDATEVLREELRKLPSHLLSLIAPFESIIDFAYQFGLRTGPFGGSTEGVFACLIQLGTYISYHECPTNEPLTSPHGTLVALGSGLLAAAAVSFASRLPDLVKLGSEAIRIAFRMGLRVDQASQRLETRRAEGPAESWAYVFSELSEDEVRQELATMNASLNFPAPSQIFVSAVSPGAVTISGPPSRLKTLVRSSELLRYAKWAPLPIFNGLCHTSHAYTHADAEDIVSATDLPTNSSYVLHAPLLSTRDGQPFAAETPAQLFEDVILELLTGTIRWDTVTATLHDRVALHFVPEVVVKALGAPNALKGFNEAVQAHADPVRVITEDVLAQSLATPLPVRAPRDPK…
Eurotiomycetes	Aspergillus_cristatus_2e_GCA_034509305.1	SAT-KS-AT-PT-xCP-xCP-Te	MAPSEVFIFGDQTVAFEPTLHRLLYIKDDVLLSDFFDRVGFQLRRYVSSLPAHQQAWFPLFTTLLDLFAQHEKVYSVPALKFALLCATEIGQFIRHLVQTTRPYPVAASTYLVGACTGSFPAAAISTSQTLSELLPAAVEAVLVSLKLGLHSLIVRHDIEASVPGQPKSWSALVDVESLSPVSQLYISSVSHSSVTISGPPRLLGPFLSPGGWRHSFLPIELPYHAPHLFQSSDLGDVVGEFHDQSLQGYKQRTKIVSIASGNVLDSYSFKALLREAALGALTKPMCWDSVVSSLTSNMQQHEVTDCTIYQVSSMSGPFISSRLSETLDVKVNTIDSIRKEALPDTGFNTTGKFSQSNIAIIGYSGRYPDSASNEEFWDLILAGRDVHRTIPEDRFDWE…
Eurotiomycetes	Aspergillus_cristatus_2e_GCA_034509305.1	SAT-KS-AT-PT-xCP-xCP-Te	MEGLRRVYLFGDQTGDFDAGLHRLLHAKNNSLVTAFFQKCFYALRQQITKLPPSQRQIFPRFTSIIDLLARYRESGVNPALESALTCIYELGCFINYYGDLGHAYPLGSDSAIIGLCTGLLPSTAVSCSKTVGELIPVAVETVVLALRLGLCVHSVRKLVDRGTSSSSSWSALVSGISEGEALDKIREFSSQKAIPPSSQPYISAVSTNGVTISAPPSTLDQLIQTSLSKDHKPVRAPIHGPYHAAHLYDTRDVERVLDSWPKDTFSSYVPQIPVLSSNTGSSIEAETIDALLRASVDEILLRQLCWDKVTGSCVSRLKGTDSSACTLVPISSSAIQSLHTTLKKAGITNIDVNSALGDIPNEPNGFSTTGRSEHSKIAIIGYSGRFPEATDPEKFWDL…
Eurotiomycetes	Aspergillus_cristatus_ACQ.1_GCA_026770215.1	SAT-KS-AT-DH-xCP-xCP-MT	MEAPMGERPISLLFGSQSTLTSESISQIRATILQDPALRFLHDVLKDLSLLWTSITNAWPALISLPGETYLIELGRFFQEGGDPPAFSETSNIIWAPLAVVSQIIDFWKTKDHIKCFHFSESPTERPPLIDVQGFCIGSLTAAATACSHNTEEFKSLSFKAVHLAVCIGAAVDFDALDTSFRGYSITIRWRSDLEYQYLEDLLDYYHRAYISCVTDTDRVTVTVNEDILAPLMNAVAERGISVRLLELRGRYHHDDHESSVQRIASICESDPRFAFPDAQCLALPLRSTVNGAIITNGSLHTALLEAILTERSQWHLIVSAVLEDARSKNVHMHFIPIGAGSFVPPSVLRNEASRAPACPKIDNGCASTYPIPIDPVLTPSDTSSEGAEGSKFPVAIIG…
Eurotiomycetes	Aspergillus_cristatus_ACQ.1_GCA_026770215.1	SAT-KS-AT-PT-xCP	MDTPSSSADVVNDHHYRLVYFSNELPSDEQIGAHLRRLQALSKDRRHPILKVFLDDATEVLREELRKLPSHLLSLIAPFESIIDFAYQFGLRTGPFGGSTEGVFACLIQLGTYISYHECPTNEPLTSPHGTLVALGSGLLAAAAVSFASRLPDLVKLGSEAIRIAFRMGLRVDQASQRLETRRAEGPAESWAYVFSELSEDEVRQELATMNASLNFPAPSQIFVSAVSPGAVTISGPPSRLKTLVRSSELLRYAKWAPLPIFNGLCHTSHAYTHADAEDIVSATDLPTNSSYVLHAPLLSTRDGQPFAAETPAQLFEDVILELLTGTIRWDTVTATLHDRVALHFVPEVVVKALGAPNALKGFNEAVQAHADPVRVITEDVLAQSLATPLPVRAPRDPK…
Eurotiomycetes	Aspergillus_cristatus_ACQ.1_GCA_026770215.1	SAT-KS-AT-PT-xCP-xCP-Te	MEGLRRVYLFGDQTGDFDAGLHRLLHAKNNSLVTAFFQKCFYALRQQITKLPPSQRQIFPRFTSIIDLLARYRESGVNPALESALTCIYELGCFINYYGDLGHAYPLGSDSAIIGLCTGLLPSTAVSCSKTVGELIPVAVETVVLALRLGLCVHSVRKLVDRGTSSSSSWSALVSGISEGEALDKIREFSSQKAIPPSSQPYISAVSTNGVTISAPPSTLDQLIQTSLSKDHKPVRAPIHGPYHAAHLYDTRDVERVLDSWPKDTFSSYVPQIPVLSSNTGSSIEAETIDALLRASVDEILLRQLCWDKVTGSCVSRLKGTDSSACTLVPISSSAIQSLHTTLKKAGITNIDVNSALGDIPNEPNGFSTTGRSEHSKIAIIGYSGRFPEATDPEKFWDL…
Eurotiomycetes	Aspergillus_cristatus_ACQ.1_GCA_026770215.1	SAT-KS-AT-PT-xCP-xCP-Te	MAPSEVFIFGDQTVAFEPTLHRLLYIKDDVLLSDFFDRVGFQLRRYVSSLPAHQQAWFPLFTTLLDLFAQHEKVYSVPALKFALLCATEIGQFIRHLVQTTRPYPVAASTYLVGACTGSFPAAAISTSQTLSELLPAAVEAVLVSLKLGLHSLIVRHDIEASVPGQPKSWSALVDVESLSPVSQLYISSVSHSSVTISGPPRLLGPFLSPGGWRHSFLPIELPYHAPHLFQSSDLGDVVGEFHDQSLQGYKQRTKIVSIASGNVLDSYSFKALLREAALGALTKPMCWDSVVSSLTSNMQQHEVTDCTIYQVSSMSGPFISSRLSETLDVKVNTIDSIRKEALPDTGFNTTGKFSQSNIAIIGYSGRYPDSASNEEFWDLILAGRDVHRTIPEDRFDWE…
Eurotiomycetes	Aspergillus_cvjetkovicii_NRRL_227_GCA_027569695.1	SAT-KS-AT-PT-xCP	MDQYAHVVAFADYLCPQTRSLPELPQVEILTPRVLRVLGGNPGQMQLQGTNTYIVGTGPERLLIDTGQGNARWAESIRSLAEKHGFKICSVLLTHWHLDHTEGVPDLLKMNPDLAGAVYKHDPDPSQRPIADGQIFSVEGATLRAVSTPGHTADHMCFFLQEEEAVFTGDTILGHGATATEDLGQYMQSLSKLSGLDCRAGYPGHGAVIANLAQKLQQEVRVKLRREQLLLRALEGFRLDKGGVTQAELTESVYGQLPTDSPTALLERYVSEILMKLATEKRVGFKLQGGQKHCPQTYKWMPSLYNIPIQAPNLHRTKLPILRNMSKQTSRNLFYFSNELPPDELHDVFRRLRSRSKTQRHPVLRSFLSQATLVLREEISQLPGDLRSQLPPLGNALDL…
Eurotiomycetes	Aspergillus_cvjetkovicii_NRRL_227_GCA_027569695.1	SAT-KS-AT-PT-xCP	MKLLYFSNEFPKDDLQGLFRRLYNHSKDRQHPILARFIDDATLAVRDEVRQLPASVKALVPAFETVLNLADYPELRKGPLSGSLDGVLLCVLEIATLIGYYENSPDRFDLRSVSTYLAGLGLGLLSTAAVSLCSTLADLPVTGAEVVRVSFRLGTLVDEVSQNLEPRDTSGFPDTWASVVPGAKVEEVQAELDAIHARENTPQPSKIFISAWGEGSVTISGPPSRIKRVLRLSEFFRRHKVVSLPVYSGLCHAKHLYNEQHAREIISTKTMASIDAAYSPTIPIYQTSTGRPFICSTAKELFEKLVLELLTQPILWDNVIQGVVDQAYTISATNCEVLVFRISVPINDLRTALSSKLQGFEASTEELIPWILEKSDNANPRGTKQSKIAIIGMSCRMPG…
Eurotiomycetes	Aspergillus_cvjetkovicii_NRRL_227_GCA_027569695.1	SAT-KS-AT-PT-xCP	MKDNTHSTALIFFGNEFPNDDLKGLFRCLLRLSRDRRFRQLAAFLEESTIVLKKEVAALPQPLRDLVPHFHTLLPLAELGDFRQGPLGAAMESALLTVLELGMFIGHYEAEGRDWDLFPHNTTLAGLSIGLLAAAGLALSTNLAEVAQNGAECVRVSFRLGVYVSEISRKLEAPQADGTLLSWAHVVTGETKSAIQDEITEYNSESGTPELLKVFISAADKTSVSVSGPPSRMKACFGSSHLLRYSKSFALPVYDGLCHASHLYNEDSINTVINSAESLIPTSRPVRLFLHSSNTGQPFLATTARELFQAIGTELLTGTIYLDNITDGILQRIGNFGPSQCRIETFRTSIVFKSILAAVKAKFPALEIELVDLIPWALRDYGTLQPRSFAHSKLAIVGM…
Eurotiomycetes	Aspergillus_cvjetkovicii_NRRL_227_GCA_027569695.1	SAT-KS-AT-PT-xCP-xCP-Te	MASQADPTRLFLFGDQTYDFVPELRDLLAIRNNPILVAFLEQSHYVIRAQMIQKLTPKEHKQARTASLAEVLQKYVDGKLPSAFQTALSCITQLGLFMRQFDDPAIPYPRFNDSYVLGVCTGSLAASAISCSTSLSELLPVAVQTVLVSFRLGLCAEEVRDRVEISDANRTKPWSVVSDISPDEVAIAIDKFSNQKALPNTRQPWITATSTKTTTVSGSPDILAELATQPRLKDSKRWMGIPIYVPAHNPRLFSSKDVDNILETTNENPWGAHGSQIPFLSSVTGKLVWVRNYRDLLHLALEQCLIEPIRWELVEAELPRLLKARGGVEAVSIVPFTTVLTKSLSAALTSEGVKVGEAQSIPAKIPERYSHRPGSARSKLAIVSMSGRFPEAPSTDSFW…
Eurotiomycetes	Aspergillus_cvjetkovicii_NRRL_227_GCA_027569695.1	SAT-KS-AT-PT-xCP-xCP-Te	MEDLYRVYLFGDQTSDFEVGLRRLLQAKDHTIVSAFFQKSYHALRQEISSLSPSERSIFPRFTSIVDLLARHCESPGNPALESALTCLYQLGCFINYHGDLGHAYPSNSSTQLVGLCTGLLSCAAVSSASNIGELLAPAVEAVVVALRLGSCVLRVRELVHQEKTTPLSWSALVSGINETDGTDLISDFSIEKAIPPSSRPYISAVCANTLTISGPPVVLDQFLDTALSKQNKAIRAPIHGPYHAYHLYDDRDVERILEHCDADLVCNRQPRIPVLSSNTGELITAESMRDFLQIALEEILLRQMCWDKVTDSCATILNSVDDRTSKKLLPISTSATQSLFNSLKKENVSNVDVDGSVADITSPIPGANRTGRAELSKIAIIGMSGRFPDSDSPQDFWN…
Eurotiomycetes	Aspergillus_cvjetkovicii_NRRL_227_GCA_027569695.1	SAT-KS-AT-PT-xCP-xCP-Te	MTPKHVLFFPHERATLAAVHDLNVRSKSRRRLHDLLTEVATVVQRHTATLDGLERASIGPFEDLVELAERHVTHAKGSIVADLVLLATVQIGQLLVLAEDQPALLSEKRYPLAFGAGFLAAGVAVTASTVDDIVTLGLEAVSIAFRLGLALQRRGKDIEESDEPWARVVSNAISVGDLEQTLGKFNASLSPMNRVYIGQVLTDSTVIFGPPSTLDVLSKAPEFAATSAPTVAQAPMHGSHLPTIDSTSIFTDSVGRVELWKLAVDQVAHQRIDIEQTVAALVNDLQSNTTDITLTNLGSTETSGITNLLEKNSLLVQPSQLNPPPKPYGSDLNTIPADAIAVVGMSGRFPDSDTLDEFWKLLEDAQTTHQVIPESRFNVDDFYDPTRAKHNALLARYGC…
Eurotiomycetes	Aspergillus_diversus_NRRL_5074_GCA_027569885.1	KR-KS-AT-DH-xCP-xCP-MT-Te	METNNLIHRVAWTPAVLCREPLQFSKVVFLSRDEEQKEHLPSYCQQLADEGYTTAVVRDDTELQALLAPGTIVVHIPHAARVKDAVYEAITRSCARLIDTAKILKQHCESQSDTKGAIRLFSLIRNDDSIAALASTLVYGLARVLKREIPDIFGGLFKDDQGRFPISAIKHAYDFDVVHVLEGVPHTASLQPFEGESMDQVPLRLDADGTYLITGGTRGMGLEIASWMCERGASNVLLISRNRPQGADGQKLASFIANQEARGVSIHVMPIDLTQPDADHILKQAIGDLHIPPIKGIIHGAGVAGYHTLSRFRPSDSEMASVLTPKVIGALHLDTLFPPGTLDFFILSSSIGQLVGFTGQLFYAPANSFLDGLAAYRRRHGDKCTSIQWGSWRGVGLMA…
Eurotiomycetes	Aspergillus_diversus_NRRL_5074_GCA_027569885.1	SAT-KS-AT-PT-xCP	MKTNCTPLIFFGNEFPSDDLKDLFRRLHQHSRDRRFWLLSLLLNESTAVLKQEVAKLPRELQELVPHFDTICTLAEVDFRQGALGAAMESALLTVLELGMFIGHSEAKDAEWELDPAHTQLAGLSIGLLAGAAVALSSSLGDVARMGAESVRVSFRLGTYVAGISGKLEARQADGTLQSWAHVITEMGHEAVQKELDEFNAATQNPELTKTFVSASDKTSVSVSGPPSRVKAAFQHSPILRYSKSLQLPVYDGLCHAPHLYSRDDIETVINSAESVVPVDRAVRLPLLSSQNGKPFAAKTARELFLEISTELLTGTIYLDEVKAGILAHVERRTNQEKYQIDSFRTSLVLQGIQSAIETSFPGLSLDRGDLVAWAHEEYGARRPASYADSKLAIVGMAC…
Eurotiomycetes	Aspergillus_diversus_NRRL_5074_GCA_027569885.1	SAT-KS-AT-PT-xCP-Te	MPSRNVLVFGSEVVDPVAALGDLHNLAKSRPQLRHFLQVAGRAIRSHLLELSIEDRSPFSGLLSIVELTERNASQGAQSALCTSVLLTVTQIGELLVYMEDNPQLHAAKAGASYMGFGVGLLAACTTAAARNASEIITIGVQAVLISVNIAVELAHRASLIMGAGETQWASAVVEMPQKNVQSHLDEQNKALPVLRQAHISIVGDTWVVVSGPPSTLKQVTDLDALKDNVSTFSTNAVALYATHLGQLDVKKLIPQSPVLNARWSSLSCFSTSQCMPFRLCLLGETIANVAPKVKKDGRDGVSVVGFGEFLPPVSQLLRERLKEVQRHLPLQTQDGTSSPSGHIAIIGMSGRFPGADTLDELWGLLQDGKDVHQEIPSTRFNLSEFYDPSGEKKNSILT…
Eurotiomycetes	Aspergillus_diversus_NRRL_5074_GCA_027569885.1	SAT-KS-AT-PT-xCP-Te	MAHRILLFGDQADAPIPMIRRVVDKARHSKNLDSFLQSAIDHVQLEVANLTPAERETVGSFHSVQDLTTALTSKTDRYGIAQMVVVFIARIGELILHAESNPSLLSTDSTLLSLGICGGLLPAAAAAVASNVSELIEVASYLAAVNCRVAAAISRRSVQIEDDTGSWAFSALGAVVAKLPALLDQFHRDQAIPRHRRAYIAISTPTWATVFGPPSVLTRLLDTSSTLKNSEITILPAFGAVHAGHLAAPDFNEIICESPLLDRPLKANYKLISGSKYAPFPCSTLRTLLPQILTDIFQNATNPARLFEVGSSYLDKSKEVSLYMLGSTSYLVLLRRSLHVQGHKVTLHTNPPTSPPTSLRSGSNSVAIIGMSGQFPGSASIDEMFESLMTRQEFHQKIP…
Eurotiomycetes	Aspergillus_diversus_NRRL_5074_GCA_027569885.1	SAT-KS-AT-PT-xCP-xCP	MDIFNLVLVGDASDGLSALLESLLLKAPESQYQIEFLDEVGISLRAQVQRLIPDQQQRSPDFTDIYTLARAYSGTGGKCHVAICNALGCVTHLLQIFGKLELPDRKVNTTANTAVAGQSIGLLAAATYSLCSSLNDLKLLAVPTVAMAFQLGLEADTRSALVDEQQGEFRSWSLSFPNITVEEAHIALEAYNSENHLYLGKQCFISAVGVDSIIISGPPTILSRFSESLKLSQPAREANWLQKFAASHSPHIHRTFDFSSFLSQCAIEERFLASFFSIQTLLSSSTGTKLVCNTGLELFKMVVHEILQAPTRLDYILDSCARVTRESTNRIPKVKVTLVGPISAADRIAAGLQDRAGPSISTLDLVPLNERHDANHSVPSRQQPLAIVGVSGRFPRGEN…
Eurotiomycetes	Aspergillus_diversus_NRRL_5074_GCA_027569885.1	SAT-KS-AT-PT-xCP-xCP-Red	MADDLKLYLFGDQTFPLHPHLKTLLYNKPNPVLQVFLTRAYNAIRTEIYQLPLRVREHLPRFTCLDDLLLWNPSGPRCIPLDMAVTCLYHLGAFISQSDADDFSPGKSRVLGLCTGALAAAAVSCSRSTLDLVPLAVDTVAVAFRTGLLVADAVHRISPSSHEPDEVWSLIVPGLAVVDAVDQFYTQTVGLPFLLPIPFSAFLVETPDKGLTQYNLFKNLPLTSKPYVSAYALNGATISGPPKSLAQLTASDSFKDIKYKTIPIYGPYHAPHIYSARDLTAILRGVISQGLSSSPQRIPLLSSTGYTIKDQSFGALLQAAVEDIILHSIQWNGIIDNIQTTLHDVGPRSFTVVPIGSTADQLIYTALKRTPLRSLLPEAPRPESIRAVAGGSTGPSTPQ…
Eurotiomycetes	Aspergillus_diversus_NRRL_5074_GCA_027569885.1	SAT-KS-AT-PT-xCP-xCP-Te	MLISTMEDPSKPPTVAMESCHSIGEGTPAQIFLFGDQTIAFEPILHNLLHVKGQGTLSDFFDRVGSQLRSCIGRLPSYQQDWFPFFTTLVDLFAQHDKHYGSPALKFTLLAVTELAQFIRYVGHGSNLYPSAAGTYLVGACTGSFAAAAISTSRTLAELLPAAVETVIVSFRVALRALILRGDLGSQVDGGPKSWSAILGTQEENAQKLVDSFNSAKGLVRVSQLYISSVSLTSVTVSGPPKILAEFVSSTSLKHSFLPIELPYHAPHLFPASEIDELVQPFHDQSLETCTQRLNIVSLVGGEVLISQDFRTLLRRAVSEALRESLRWDVLATALGKSITDDNHTQCQIYQVSSTSGPFIASALTRESSLDVKIINLVEEAQETDQKSNTTGKFSISDI…
Eurotiomycetes	Aspergillus_diversus_NRRL_5074_GCA_027569885.1	SAT-KS-AT-PT-xCP-xCP-Te	MDRVNLIVFGDQTNDLSALLGKLLLGAPHSAAQSDFLRDARAALCAQRDRLHPFQRKDLPAFKDIHSLHRIYEEGNGIFRYFEGRRRTSEDDANIAVAGLCTGSLVAAAYAASSSLDDLKALAIPTVSMAFQIGLQAAIASSMIHEQSNPPDSWSIVIAKMSEDEALSALNKYHKVDRPSLHDRCFVSAVGLRGVTISGSPPALSRFADGLLASTPSTKIVPLPIFAAYHAPHIHTVLDFPAILKRCHINPGLLADFKCVKTLLSPLTGEPVEGTNALDLLETMVHHTLQAPVRLDLITERCVTLIERNDVSTIQIDVVEPSPVGDSLAAIFRNLSKAHVFTRELVSLDTEADEYRPSASFHNSPLAIVGVSGRFPGADSVDALWGFLEAGLDLHRVIP…
Eurotiomycetes	Aspergillus_diversus_NRRL_5074_GCA_027569885.1	SAT-KS-AT-PT-xCP-xCP-Te	MKEQLHSTLETHRVAFFGGQGSRAVFSPELADTTIQYTQQSRTAGKLLSTCYNAFQQELSNAREQEARKNPVLTELVEMTSAESLLSPPFTHHSNPIIQGVSLLIQQALSYLGHVEDSAVSSGPKVSLQGILSEWDEVMGFCSGVLPAFVVATSSSIEEFLRGCEHAVRLAFWIGYRVAVFCEEKAGPQWRARPWSIAVSGMDQDAVREYNIKRDETVCFSARISPDIITLTGTPSALDEFKSDAEVSADPIPVHGWYHGGEATESVVQALLRDVERRDISLTASKSLLVPVRSTVDESLTTMGDQSTLTETAVRIILTHSLDWYKTWESLSLGATMTELHAFGPHSRSFFSANSKNARVIDHSVPDTNRGPHEDIAIVGMSVNFPSAPDKETLWKNLE…
Eurotiomycetes	Aspergillus_diversus_NRRL_5074_GCA_027569885.1	SAT-KS-AT-xCP-xCP	MMSASIPSLIICGSQTIPPTAETLAQLASCLAKSPGLQPLREAIRALPEVWATLRATEPRFQALSDSPVVFLRDWLASSASSHPDMSVGSDIPVTLPNTLLAPLTVIIHIVQYKHYLDSLGINNADAHDRIRDASNSTAQGTEALSKFQGLCIGSLSATALDCAPIKTALGQNAVAAVKLAMCIGAYIDSERLSDSSADIACFIARWGADHRREGIEETLTRYSEAYISVELDHNSVTITAPSSDMRSLQGELSDAGVRVADIPIRGRYHSRKNVDMLRSLLTICFAPSSPFCVPWGAEKVEACVRSILTEPAHWFSDITTTVNSLSSGAKESTTTLELGLVNCFPPSLCAVPHHHIIRGSPPQDSYHYPESSVAIIGAACKYPGADNLNQLWTLISTE…
Eurotiomycetes	Aspergillus_elegans_IMI_345568_GCA_016097275.1	A-xCP-KS-AT-KR-xCP-Red	MTVLTTEEFQLTKDAVTLGHALTPLLEQAASSHFDKTALICGDQTLTYGELNARANRLARVLAERGIKRGDLVGVALDRSVDLVAVLVAVLKSGAAYVPIDPALPAKRMSLMIEDAVPKLVVANERALAALTPWSGICVRMDAVRRTMDLAIDSANLDIDVWPSDLAYVIYTSGSTGAPKGVEVSHRSVTNFLIGMQRRIGCSKADRLLAVSSISFDMAVYELFTPLIAGATVIVTPSAHIQDARALLGLMQSHAVTMLLATPTSWQMLLHAGWSGQPRLRASIAGGEPLPGHVAEKLVDYSDAVWNAYGPTEATGCASAWRVQKGEGMLIGEPLGNVQVYVLADDLTPVPLGRHGELYIGGAGVACGYRNNPERTKSHFIRNPFGKGRLYRTGDLACF…
Eurotiomycetes	Aspergillus_elegans_IMI_345568_GCA_016097275.1	KR-KS-AT-DH-xCP-xCP-MT	MTSDLFHRLHWTPATLAQEPLNFTKVIFVVDSPRTQESQSTRLLAAYQAELVSWGYATAVINNPLEIHDILTPGTATIIVHIPHVAHGCEGVYDAAIDSCASLIAIAQELVSRPGTTTKLFSIVADDDGISELGHAPLTGLARVLRMEIPDLFGGLLQLGTPSWGFPLSAIKYAQGFDVIRVCDEGEESVPQTASLQPLVLNGEGENELSSQLNSNSTYLITGGTKGIGLEIASWMVAHGARHLILVSRHGLEVSGAGGAASNHLVARIADMEAQGASVHVLAIDLGLPGAADTLRKAIDSLQQPDVKGVVHAAGTAGYHTLNACTPTDIQNVFASKVRGALSLDALFPPRTLDFFLLMSSVGQLVGFPGQLSYAPANAFLDGLATWRRREGDNTTSVQ…
Eurotiomycetes	Aspergillus_elegans_IMI_345568_GCA_016097275.1	SAT-KS-AT-PT-xCP	MQRPSEVDEKETAEKSLRPTLLYFGNGFPNDDVYELFCRLQQHSKDRRFRLLNSFLEESILVLQDEMAKLPHHIKSRVPYFDNIVTLHYEAIDSEFNFPKSLTIITGLSVGLFSAATIALSSSLAEVVSNGAECLRVSFRLGVYVSDLSRNLEGPQPDSLLASWAHVVIGMTEEAVQSELDRANEELKAPEVSKVFISAADKSSVSVSGPPARIKAAFLQSSELRYSKALPLPVYDGLCHATHLYGEDDVKVVLETSESLIPATRPIQFPVISSQTGVPFAATTASGLLYEIVTELITGTIYVDNIIAGILRHIDCFSGARICRIDSFRTSIIFKAIIEANGSDHPTMTMTKNDLVGWVHQNFDPRRRNNPASSKLAIVGMACRMPGGANGIEEFWELL…
Eurotiomycetes	Aspergillus_elegans_IMI_345568_GCA_016097275.1	SAT-KS-AT-PT-xCP-xCP-Te	MAQQLHVYLFGDQTFEVSTKLPPLLHSKSSPLLEAFFEQAYQGLRSEITQLPARERDTYPRFSSIAELLSWRNRQEKLHQPIETILTCIYQLAQFISEHDGFGRTYPSPTETCMSGLCTGALAAAAVSCCKTVSELIPVAVQTVIVALRTGQCALNAANAVDQSEGNWSTVLTGLSQQEVSDRLQEFSNSHRLPITSQPYVSAYAENWVTISGPPRVLGLLRHSENFAKVHPRPISVFAPYHAPHLFTKVDIEGILSTTPEGVWGRYGAALPVVSSTTGKLVEGDNLRRRLEAALVQILLEPVQWNQLTQGVASVISSSGASQFTTSPVGTNADAALGAALNSTAGLSDGIVPERAPQTTDIESDTSKPAGSTGRSKIAIVGMSGRYPSADNNEEFWDL…
Eurotiomycetes	Aspergillus_elegans_IMI_345568_GCA_016097275.1	SAT-KS-AT-PT-xCP-xCP-Te	MSVNVFVFGDQTLPFESSLHALLQVKDNPILLDFIDRLGYHLRRYVASLSVSQQNWFPCFTTLVDLFAQHEKAHACPALKFAFVVATQIALFIKHFGDGSRPNPTDNTYVIGACTGCFAAAAISTSHTLTGLVTPAVEAVLAALRTAVHALILRDDLIPEDEHKAWSAVVGTDESVAKDLVEKFNAEKSLPRVMQLEVSNRGFTNCNLYHFQYRGSFLATGIAQQIPSLNITTISISKACPPSLPTAQPTGKFAHAKLAIIGYSGRFPDAASNDEFWSLLLAGRDVHRTIPEDRFSWEKHYDATGKTKNTSRVKYGCFIKEPGVFDARFFNMSAREAENTDPSQRLAITTAYEAMEMAGLVTNTTPSTQQDRIGVFYGNCNAFDDGADGYCRSDSVGSV…
Eurotiomycetes	Aspergillus_elegans_IMI_345568_GCA_016097275.1	SAT-KS-AT-PT-xCP-xCP-Te	MERPGTILFFGDTSTSVISALSQLLESERKDTLLSRFLTLSKNVLRDSVEHLPLHVRQDARRFTELYDFTDPQHGKSSSLRVLSPALLLIAQLGQFISWYETHPHADYPSPHSTVYIGLCVGQISASVISLSSNLLELIPLAVEAVRLALNLGSLVFTVRNDLEYDTDGASWALTVENKIIEKQLLDLSPEALGIPHRKQAYVSASFENTTTIQGPPTTLARLKQALINLKEVSSNLSGRPVAIYAPYHASHLYTEKDVLELMDSSCSIKYAYSTETWHKEQPEMLSTSSGSSIPVTSRRGLLNAVLEDILIKPIEWSNIIEGAISSVHSIGHTKWNTQCFGPLHSQKSLVAAISAGADVEILLADMSTHSTTSHSGEPLNTPIAIVGMAGRFPDADSV…
Eurotiomycetes	Aspergillus_elegans_IMI_345568_GCA_016097275.1	SAT-KS-AT-PT-xCP-xCP-Te	MVNAVDVLHFGDQTVDIRSSLQELVHLSKSSQTLATFLQSSADTLRAALFAPPSASLSESSWRSLRDLGDAFAESPDENAPLAPAALCICQLGYLLLHLQDKPRLLCGNDRKILLGVCTGMLSASAAACISSVSELLKLGPELIHIALRLGMRVSSRSQNVEHTPGSWSLACAGISLDPLRDTIAQFHQIHSIPPTKRVYVSALVHQSAFTVSGPPRILQEFSRFTETQLPEARRTRLSIHGAYHASHIHGADVESILGESPILDTAVVSRRSVFSTSSGRAMEDVSTLGECLRNALRDILRQPLDWRATLQGLVDCDLEHPVLTTIGPSYMAKSLKETLQWDKIADGKDTPPVQDGSISGSFAIVGMSGRFPGSDDLDSFWGVLEDGLDLHREIPANR…
Eurotiomycetes	Aspergillus_elegans_IMI_345568_GCA_016097275.1	SAT-KS-AT-xCP-MT-Red	MTSKLSPPPGHKAILVFGCQCLTFSAEDFLALRETILSSPHYAWALDVLAELPVYYRTATQYLPNLTTIPGEPQLRSLHEWFRTGDIEGETFPPPYIQLAPLLMLTHFTQYEQYLCLSKAYSEEGRIHAEESEIGEIVGFCIGFLSAAVASAAESREKLAEYASVAVRLAMLLGAIGDAMEVQEEWTSLATVWKGDMEGALGEVLKGFPEAYITVRYDDNRATIMTPRRTLFQLHDALQSASFGCSQVDFNGRYHWSGHHDAVQSLLSMCSTDASLQLPDASQLIRPTRANTGGQHVLSGPLTTLVIESILQQQCNWLHTFSSVYTTQLQDTSSIVVEFGQERCIPPTFMRSLRNRIIHFSDLNLDLTSRLSPLHPSPKSYSSDIAVIGMSCRVAGADS…
Eurotiomycetes	Aspergillus_eucalypticola_CBS_122712_CBS_122712_GCA_003184535.1	A-xCP-KS-AT-xCP	MVPENDFNLTDDPSKLGHNVVSLFNQIQTRYSPKPAIVCGDHTITYGALASESDRLACLLLSRGISRGHVVALALDRTPDLIMFILGVLKAGAIYVPVDPALPPERVNQMLDDEALRLVIVSPASTEGGTGTSRYDYGHKAACCTTSELRDQMRYQADKKPAVDIQADDIAYILYTSGSTGKPKGVEIHHAAICNYALSVHQRPGCTDQDRVLFKSTISFDMAAFEIYVPLLCGATVVQAQAHEIGDPRALIHLLDRHSVTFSVATPTILQMLLDSGWSGTPGFSRLVTGGEALSPRLAERLTACVDEVWNLYGPTETTASVAAWKVQVREDILIGTPNPNTRLYVLDTDMQPVPVGSTGELYISGAGVARGYRNNPERTKAAFLPDPFWQGHTMYKSG…
Eurotiomycetes	Aspergillus_eucalypticola_CBS_122712_CBS_122712_GCA_003184535.1	KR-KS-AT-DH-xCP-xCP-MT-Te	METSNGIFALNAFLGKWQQLTTATTGWWLLWAGGLTLILGLLKLARTWWLLRHIPGPFLASISNLPRVWWQITGRAHLYHQAAHAKYGDVVRIGPRMVSFSNPEAIPTVYPVRPGFPKGDLYSALRPYTSERGPIYLVFNTQDESMHKLIKSPIAPLFSLSSVVQFEGLVDEVLAVLSKQLDERFVATGETFDCADWLHFFAFDVMGTLSFSKQYGALEQGRDVNGMLSEVYRFFRLAAPMTQITWLDPILYKNRLVHTLRKLQKKTPSMSILDFASRAIKERIAKEDNDKEDADIPPRKKDFLDRFLEIHRQINLLSHPDSLEKLQRELDGANLTRPYPLWEQVRDLPFLDACIQEAARVHPPFALPFERVTPRGGVTVLGHYLPEGTNVGGNAYVVN…
Eurotiomycetes	Aspergillus_eucalypticola_CBS_122712_CBS_122712_GCA_003184535.1	KR-KS-AT-DH-xCP-xCP-MT-Te	MASSEWIHQLTWLPAALSKEPLQIGKVVFVVTDRNNEKLSAYQAQLAHEGYATVVTCDTTNISPSLTPDSIVVHIPPAAENKSSVYEAATQACTALVQIAQQLYRCSVSTNAKTVKLFSVISKDFDTGDLGYAPLHGLARVLKMEIPHIFGGLFEDDVGLFPLSAVKYAQGFDVVRVCRGEAQTACLQPFPDEINHQRGLYLDSHSTYLITGGTGGVGLAIATWMARRGAKHIILVSRRGLKPIGGRNIAEATGQEPISPIAGLEALGVSVYVLAVDLSKPNASSILSQAINNLSSPPIKGVVHAAGTAGYHTLASCTSSDIADVLAPKIIGGLTLDTLFAPGTLDFFVFTSSIGQLVGFPGQLSYASANAFLDALAAYRRRQGDNSTSILWTGWRGVG…
Eurotiomycetes	Aspergillus_eucalypticola_CBS_122712_CBS_122712_GCA_003184535.1	SAT-KS-AT-PT-xCP	MSAPTKLVFFGNEFPNDDLKSLFRGLHRHGKDRRFRQLATFLEESTRVLQNEVAQLPEPLKKLVPHFENLMPLTEVDFRQGPLGAAMESALLTILELGMFIGHYEAEERVWDLSADRTTLAGLSIGLLAAAGVALSTHLAEVVQNGAECVRVSFRLGVYVHDISRKLEAPQADGSLLSWAHVVTGESASDLQEELSRYNTETSTPELLKVFISAADKTSVSVSGPPSRIRAAFRASQRLRYSKSLALPVYDGLCHAAHLYDEETIHRVLHPDGSVIPTSRPVQLALLSSRSGQPFEATTAAELFRAISTELLTGTIFLDNITAGILDRTERCADATQCQIETYRTSLVFKGLLKALEACFPDRTINTTDLIPWVFQDYGARQPKSYADSKLAIVGMACR…
Eurotiomycetes	Aspergillus_eucalypticola_CBS_122712_CBS_122712_GCA_003184535.1	SAT-KS-AT-PT-xCP	MGQSSEPDGRDSTHYIPTPKLVYFGNEFPNDDVNELFRRLQQHSKDRRFRLLSAYLEDSILVLQDEIAKLPHSVNSRVPHFDNIVTLSENGYLRELGLGAAMESAFLLILQLSLFIGHHEAIDSDFDLPKDVTIVAGLSVGLFSAAAIALSNSLAEVIKNGAECLRVSFRLGVYVGDFSSKLEAPQPEGALASWAYVVTGMERDSVQSELTRVNQDLGTPEMSKVFISAADNSSVSVSGPPSRIKAAFLHSSDLRYSKSLALPVYDGLCHANHIYSQDDVNEVLNTPMSLIPTTRPLRLSVISSRTGKPFTATTASGLLSEIATELITGTIYLDNIIKGIQHHIGAFSGAGICRIDSFRTSIIFKSILEAIAEDHPRVTIRKNDLVDWVHKDFGPQLRN…
Eurotiomycetes	Aspergillus_eucalypticola_CBS_122712_CBS_122712_GCA_003184535.1	SAT-KS-AT-PT-xCP-xCP-Te	MEGPSRVYLFGDQTSDIEAGLRRLLQAKNSTIVQSFFQQCFHAIRQEIAKLPPSQRKLFPRFTSIVDLLSRSRESGPSPVLESALTCIYQLGCFIHFYGDLGHDYPTPSNSHLVGLCTGVLSCTAVSCAKNVGELIPVAVEAIVIALRLGICVFRVRELVASADSESTCWSALVSGISEAEASRLIDEYSSKKATPPSSKPYISAVSSNGVTVSAPPTVLDEFVETCISKNYKPVKAPIHGPYHAPHLYDDKDIERILQQSSALEELTSWSPALPVISSNTGKPIKAKSLKDLFKVALEEILLRRLCWDKVTESCTSVCKTGTNHSCKLFPISSSATQSLFTVLKKAGVSVSLETGVGEIAMNPETRNLTGKAENSKIAIIGMSGRFPESDGTEAFWDL…
Eurotiomycetes	Aspergillus_eucalypticola_CBS_122712_CBS_122712_GCA_003184535.1	SAT-KS-AT-PT-xCP-xCP-Te	MMASELLYALTIYGYRKPGMPEDEYHRYLSDHHAVLVRNHLVKMGIVRYTLTHNTSETKEMMKHIFGNLPEGHTSDCDCLAQIIFRDVEDYVRARNDPYYKEVIFPDHENFADSNRTQTMLEESSTKTDTSAMSKMGTVAEVFIFGDQTVAFESTLHSLLHVKDNAVLTDFFDRVGYQLRRHVGNLPLHQQEWFPYFTTLIDLLAQHENCHAAPALKLPLLCAAELGQFIRHYGQAGRTYPAPESTFLIGACTGAFAAAAVATSQTLAELVPAAVEAVTVAFRTALRSLILRDDLEFTIDGSQKSWSAIVGACEPEAASAIRCFNVEKGLPPVARLYLSSISRTNVSISGPPRLLDQFLLTCAWKHSLLPIELPYHASHLFRKDDAEIIVGEFHDFSLL…
Eurotiomycetes	Aspergillus_felis_FM324_GCA_016413765.1	A-Red-KS-AT-DH-xCP-xCP-MT	MAAFIPPKVSLDGTANTGIRTLPDLVDFHGKHNPQHLFCIQTTRDHGFVSVSYETLQRAIVRCQARLRGEDAVLHPPTVDADGHVTKCAPVAILMESHVGLAIYVLACMGMGVPVVLLSARLSSSAVRHLLQETGANLVVVSPRLQALASEAISPSDETSGFELNSDGAVTIRVAAEWESILEEEEDADESQPVCVAFATHFVSEQDRQVVILHSSGTSGLPKPIPCSHKYFLGYATCHTFASESEAHSLTISTLPLFHGFGFVAICLSLGAGKTVCIPPPSTIPNGASIVALLQHSGASALLTVPSVLEEIEGLPKDKGSEALARLDFVGFGGGMPKESVGQRLKATGVKLIGQYGATETGPMTPFFIPGRGHDWRRLRLRRDTLGPLQVKLDRVDAG…
Eurotiomycetes	Aspergillus_felis_FM324_GCA_016413765.1	SAT-KS-AT-DH-xCP-xCP	MALALPSTIVCGSQTPPPSRECLQRIRSNLRNPKLKELAKAVDDLPQFWSHLVEIKPVLSQVNDESLQKLKDWARDECFLEIPEDLPNILLAPLTVIIHLVQYLQFAHSLDADDSQEDRHRRILQSTCKGGFQGLCTGFLSAAALACSRTERDIWCNATVALRQATCVGGYVDLDRLTYDSTDVYVCMIIHWEDNCGKDRVTEVLKGYPGVYTSVELDDRSITVTAKQSQVSSLRADLAARNAKVTNIPIHGRYHSITHAEILQDLVEICNNDESLRFPIINTPFVPLRNNTTGDLITSAEKLHELTLRCVLTEPANWYSTMTETISSLKSQPEKNQRPLILELGLVSCLPRSLTASANLQVFSPPLTSTVSPKDQKSSTNDEHRYDYPEHSIAVIGAA…
Eurotiomycetes	Aspergillus_felis_FM324_GCA_016413765.1	SAT-KS-AT-PT-xCP	MKVVYFGNELPHDGLQGVCRRLHAYTKDRRHPLLARFIEESTWAVRDEVRQLHAAQKALVPPFESVLHLAEQPELCKGPLCGSIEGVLLCAIQLGTFIGYYEASPNEYVFDSAHTYLTGLGLGLLASTAVSVSPTLADLPLAGAEVVRVAFRLGVLVADISQNLQPADATGDQGSWAYVIPNVAPKEAEEELTVIHTRENTPEASRIFISAISRTSVTISGPPHRLKRLFRMSDFFRDCTFIALPVYGGLCHAKHIYSSQHSRSVVESPSTAALDTRFIARYPVLSTSCGEPFPTATMARELFEHIVTEILTQAIEWENVIQGIVERAKLLSVSEVQVLVFRISLPVHDLQSALQMSLSERVEVTIKDLDPWVSKIRDDQGFAPRGTAQSKIAIVGMSC…
Eurotiomycetes	Aspergillus_felis_FM324_GCA_016413765.1	SAT-KS-AT-PT-xCP	MGESIMNIHNNASRKMKLIYFTNEFPQDDLQTVFRKLHNHSKDRRHPTLARFLEEATLAIREEVRRLPTTLRALIPPFESILNFAEFTDLRKGQLCGSIDGILLCVLELGTLIGYYENHEDAFNGDPASIALAGLGIGLLATAAVSIATTVADLAITGAQVVRLAFRLGVLVDEVSQNLEPRDTTEGSSPDSWAYVMPNVSVDEVQHELDAIQAKERTPEPSKIFISARSTTSVTISGPPSRLQAMFRTAKFFHEHKCIALPVAKFVPRLPVYSTSTGQPFPASSATDLIESIIAEILTKAIEWDRVIQGVAQLARDLNATECQLVVFRISLPIRDLAAALKNNSDVESYIKEILPWVHQEDESDEGGPRGPLQSKIAIVGMSCRMPGGATDTEKFWDL…
Eurotiomycetes	Aspergillus_felis_FM324_GCA_016413765.1	SAT-KS-AT-PT-xCP	MATPRAQTVWFGNEFPVDDLKDLFRRLHQQSKDRRFRLLSVFLDESTAILKEEVANLPHQLQELVPHFDTACTLAEVDFRQGALGAAMESALLTILELGMLIGNYEAEDIEWDLDPSQTILAGLSIGILAGAAVALSSSLADVAKVGAESVRVSFRLGVYVADISTKLEAPQSDGTLQSWAHVVTGMSHEAVQEEISQFNAVTQNPELTKVFVSAADKTSVSVTGPPSRIKAAFQHSPSLRYSKSLPLPVYDGLCHAPHLYSQDDIDTVINSAKSVIPSSRPVRLPLISSQTGKPFEAKTAGELFLEIGTELLTGTIYLDNVTGGILEHVNLKEPTGSYQIISFRMSQVLKGILTAIETDFPALELDRRDLVSWVHGDYGARRPSSYAGSKLAIVGMAC…
Eurotiomycetes	Aspergillus_felis_FM324_GCA_016413765.1	SAT-KS-AT-PT-xCP	MRLFFFSNKFPTDDLPELFRRLRLRSQSPGHVVLRRVLEETTRVVREEIHRLPPELRSLIPPFQSILDLAENYNWHKGPLCGVFECIFLCLVQLGLFVGNYESRSHEFSFDAQRSLFTGLGLGFLAATAIVASPSLLDLPATAAEVIRIAMRAGILLYQKSQDLEPQSLNSSLESWTTVVRGLDENTVREELEMFNMSTETPPSSKVYISVVEPDGSVFVSGPPSRLRKFFSKPGKVQSAPRAPLPVYGGPCHAAHLYDRTHSAWVVSEVHPDIASRRLSGAPLILSMGDGQPLEGETVRDLFESATYVLLTSIIRWGNVLAAVGKFPHWQHDMKLQLEAFRPSSPVVHGLLSAVQTDYPECTISVEDLGQWINDNDLEPPSSPVDSKIAVVGMSCRLP…
Eurotiomycetes	Aspergillus_felis_FM324_GCA_016413765.1	SAT-KS-AT-PT-xCP-xCP-Red	MADHLELFLFGDQTYNPQPCLREMMRNRHNPALENFLSKSYDAIRAEIYSLPHEVRADMPRFTCLDDLILWKQDGQQCIPLDMALTCMYQLGAFISKTEGGCYPAEDSAVLGICTGALAAAAVSCSRSTLELIPIAVDAVVIAFRTGKLVADITRTLEPLHAPVQSWSIFIRGLTSAEAVRKFREQTVLPLTRQPYISAVTPNGITVSGPPSSLTQMTSSSTFKDFRLETINIYGPYHATHLYSQNDVEAIVGSLAPRGSDARRQMLLLSSTETPVRAGGLDALWRAAIEQILLQPICWSSMFGQLQAMHQKVSPKTIRITPIGTKADQLIYTALRQTPLCKSLAMPEKSPKAEPQTPYSNPGKPKLAIVGMSGRFPGANDIEAFWDLLYQGLDVHKPV…
Eurotiomycetes	Aspergillus_felis_FM324_GCA_016413765.1	SAT-KS-AT-PT-xCP-xCP-Te	MEDLRRIYLFGDQTISCDEGLRNLLQAKNHTIVASFIERCFHALRQKIARLPPSQRTLFPRFTSIADLLARHRESGTNPALGSALTCIYQLGCFIDYHGDRGHPYPSSDDTLLLGSCTGLLSCAAVSSCKNVGELLPLAVEVVALTIHLGLCVMRVREMVDSTESSSGSWSILVSEINEADAANLISNFVKKRVSTVYDLWKKILTYQGITPSSQPYISAVGSKGLTISAPPDILDKFIEQGLPKEYKHFKAPGVCGPYHAPHLYNDREIRDILNFCSENVTSRYAPRVSLVSSNTGKLVQAKSMRDLLKVALEEILLRRICWDKATESCLSIVQAANDKPWKILPIASNATQGLVTALQRMGNCQVEVDTGVGAPQMDPAALNATGNASRSKIAIIGM…
Eurotiomycetes	Aspergillus_felis_FM324_GCA_016413765.1	SAT-KS-AT-PT-xCP-xCP-Te	MSPSRIEDRTPSLCLTMCAYRKEGLSEEEYRKYMTEVHAPKVRALMVKYGIERYSMVHNPSKTRALMSTIYDAQFANVADYDCIVQIQFCDVEQFVRLKADPEYLQTVAPDHEHFADTKRTRWVTSVLNKSNDRRHLALDFKMRAPMQILLFGDQTNDFVSGLRQLLRAKDKSLLTTFFEKANYALRQEASRQPRHIQEILPRFSSISDLLARYTTASQAAPMLESTLTTIFHLGCIVGYYEESSRPYPSASHDVLLGMCTGLLAASAAACAPTVVQLVPLAVEAVIVAFRTGLHARKVGNALEPSAASVNPWSFIVSNMKLESICSHIDSFCNDAHLPIPSRPFVSAVGPSSVTVSGPPRILKTFLASPSMATHTAVPVSIHAPYHASHLHTESDVED…
Eurotiomycetes	Aspergillus_felis_FM324_GCA_016413765.1	SAT-KS-AT-PT-xCP-xCP-Te	MEDKLHSTLELHQVAFFGGQGSRAVFSEEASTTAIQHARRSRTAGKLLESCYNAFLQELSSASEQEHGQSVLTELAELTSSELLLSPPATHQSNPIIQGVSLLIHQLLSYLNHVETCAASPEPPLSLQEITSKYAEVMGFCSGVIPALIVATSTSIEDFIQGSDNAVRLAFWIGYRVASFCEDRAGPQWRARPWSIAVSGLKEEDVVRFNSKDGNETVCFSGRINTDIITVTGTPSALELFKIFSKGNGEPVPVHGWYHGGDTTKSVVHMVLQDITRRSISFPAPQSLYIPVRSTVDGNLMTLPREVTLAETAIQIILTHALNWQLTCESLSLGPPSTEIHAFGPHSRSLFGTQWNNTRVVDHSLPEMPKIPPADIAIVGMSVNFPSANNKEALWNNLM…
Eurotiomycetes	Aspergillus_felis_FM324_GCA_016413765.1	SAT-KS-AT-PT-xCP-xCP-Te	MHRPIQVERLNLVVLGDQTNNVSALLKKLLLGAPYSVAQSEFIRDASAALRAQSDRLRPFQREHLPGFKTIHDLARIYEESNGLLQIFRYFEGRGRRPENNEHIAVVGLCTGSLVAAAYATSASLDDLKLLAVPTVSMAFQMGLQAATASNMLHEQGNPLGSWSIAIPKMTEDEALSALKIYDAGGHLSLRHRCFVSAVGLKSVTISGSPPALGRFAESLTASQPSRKIIWLPIFAGYHASHIHTVLDFPSFLSRCGIDVDLLSSFKSIKTLLSPLTGEPVDSNSALDLFKTVVHHTLQAPLRLDLIVDRCAFLIRENAIASVRIDAVGPTPVADSLAAALRNRTSANISTRELVVLEPGVDQYKPSAAFSQAPLAIVGMSGRFPGAESAEALWSLLES…
Eurotiomycetes	Aspergillus_felis_FM324_GCA_016413765.1	SAT-KS-AT-PT-xCP-xCP-Te	MNQIPVFAGLGSEALFSERTLGTAAEDARTPEGQIILRACHAIFVKEITSVIQSQRLPSDIKLEDFMEPESLIRPRACYQRNSIIQHVSLYTIQLLRYLRHSREKPGFLLGVAGFCAGLLPCAALATSRNTIELLARGQDFFYVALHLGIRIENYRQVMVAEEGCPPDLPWSLVVDGITPQHARELLEEHNRRSPASYVYLSAINSDTCVTLSAPLHLIAPLFSNVDGKPIDSGQLATFEEFCDKLLDMMLLEPADWAAVEDNILAAIKESATAADASYEILNFGPGYGMSGARHTLPDNVKIVVASIVEQRPSPQDASGLLSSDDIAIVGMGVDLPGAPSTDALWQNLVEGVNSCSEIPSSRFHVEDFYHKKDVRTIRTKYGNFLDNPFMFDNELFGI…
Eurotiomycetes	Aspergillus_felis_FM324_GCA_016413765.1	SAT-KS-AT-PT-xCP-xCP-xCP-Te	MEQHHRIYLFGDQTYDVDAPLRELLHHSDPILTSFFERALHVLRLEIGQLPSELRHEFPRFSSIAGLISRRGDTRLHPGLEMALVLIYQLGSFIRWVQFTAQSTSCSRSLVELLPIAVETVLVAFRTGLCAGRIGNCIEPTATGSREWSILVAGMDSQTVEDALAQFSATKSLPRMSRPYISAYAPNGLTVSGPPSILAELRQSSAFARVACKSIPIHAPYHAPLLFTKDDIDEIVDTAINDNWASYIAQLPVISSATGRLIWAGNFRALLQSAIEDVLLQPIHWLKVQDGMKSTLPSTSMVNYEVIPIATQADPLLSRALQQPIMNPIPALSEKQQDLTTPNNRAKIAIVGMSGRFPGANNTEALWELLSQGLDLCKEVPANRWNINTHVDPTGKRKN…
Eurotiomycetes	Aspergillus_felis_FM324_GCA_016413765.1	SAT-KS-AT-xCP-MT	MELPKVGDVLCSLDLTTVVPLILVAVLGHSGQSSPTSNGFTGLKLEELRSTTSRCMRNMAHVSGLDQIWCRYLTRQSFPYYIKCEQSAFYRAFMPYTPSGLIPSIFTTQDEATHKQMKSHIAPLYSLSQTVLFEETFNELLQKLFNQLDVRFADTGVEFDLGDWLRYFAFDVMGMMTFSKEYGFLENGTDVKGILADLRDFNLVAGPMTQVPWLDRILHKNAIANALRRQVVSPLLDFVNRAVMDRQRTVHGQGSVHRRDFLSHYIDVQAKDSTIPPSYVSSWALSNVIAGSDTTAVAMRVLMFNLLSHPDSLERLSQELKDTMNSTGLTTPFPAWKEVKDLPYLDACVNEALRLQPPVCLPFERVAPRGGLTFTLCGRHFKEGTILGMNPYVVHRHRP…
Eurotiomycetes	Aspergillus_fijiensis_CBS_313.89_CBS_313.89_GCA_003184825.1	SAT-KS-AT-DH-xCP-xCP-MT	MTISVGVFCPQSRAPSASYLQSIRQFILTHPILQCLVTEIVTLKEVQTLLAMKNAAINRLPRALQYTDHLIQWLVAGDGDAAASTQSGIVALPRLVILQVAQYFQYLESQQITHADVIAQVRTASGLQGYCGGLPAALALSCAASETEVGPLICTAIRLAYAIGLYAELGDDSTVPGATTIVVRLKSEGQAEDLVRHCRHTYISAITDPRSVSLVGPVDELAALQERASDLGLLVQAMDLRGKTHNPENMDLARDLVAVCRESEMLQLPGPEHLKSPVRSNRTGDFITGRGSLSEEIVQTVLASRCEWYQLLCNVARGLQETGTPTHQIVSFGVGDVVPLMPFNKLGLRIEKQDWGAPKRRLGPEKLPSYPDDAIAIVGASCRLPGANTMEELWGVLSE…
Eurotiomycetes	Aspergillus_fijiensis_CBS_313.89_CBS_313.89_GCA_003184825.1	SAT-KS-AT-PT-xCP	MAIYTPSRSEDDGSREPVQLRVLHFSNEFPKDGLCTLFRALHYRSKDRRYPLLARFLEEATRALREEIRGLSSSLNQLVPPFESILNLASFTDLRHGPLGGSVEGVLLCTVQLGTIIGYYEQHPEIFPSDSTSTVLTGLGMGLLATAALSLAATLADLPSSAAQVVRQAFRLGIVVDEVSQNLQPRETTTPSATPDPWAYVIPGVMAEEVQQDLDVLQKQTPVASRVFISAASVSSATVSGPPARLKELFRTAYVFSNRKFVPLPVYGGLCHAGHIYNDEHVRRVVRTPSISGHHGRSVPCLAILSTCDGRPFTGQDATELLEQIVREILTQRIEWATVVQGVVQQAQGINAEHCQMLVFRNSLASHDLAAALQNINPAVEVSTDEIISWLHEAQTPAD…
Eurotiomycetes	Aspergillus_fijiensis_CBS_313.89_CBS_313.89_GCA_003184825.1	SAT-KS-AT-PT-xCP	MVTYTPPADAQDLPNKLKVLYFSNEFPTDDLSTLLRRLHSHSKHSSHPILARFLSEATRVLRNEVSQLRVELGQLVPAFESVTTLAGETKLRKGPLAQSIDGVLLCVLQLGMYIGHCELYPEDRATETNSLLTGLGVGILVSTAVSVSTSLDDAVMAGVEVLRIAFRLGVFVADVSHNLEAVDAESSESWAYVVHGMTVDEAQTELDDIQAKERTPSASKIFVSAISETSVTVSGPPSRLKALFRNYASFRDRKFAHLPVYGGLCHAAHLYTREDAQAVVRSPSLPARYKPVVPVMSTSSGQPFLASSAAELFEQVIFEVLTKQIVWDNVIRGVAERVAKTDVHDVNIKVFRHSLPAQQLSTALTSAMTDLPVDSDDLLAWVGTDVDHGQYSPGSSMQS…
Eurotiomycetes	Aspergillus_fijiensis_CBS_313.89_CBS_313.89_GCA_003184825.1	SAT-KS-AT-PT-xCP-xCP	MAHHDSVSLVHFGDQTANLDSSLRALLRSAKRLPDLDQFLRRSTEVLQTGVRTLPVTSQAEWACRTLGDFLLAVEASVDEHRPAIVTVLLTICQLGYLYVYLEQQLPDFLQSAKRIMVGLFVQGSWAVSVSGVTEEQLRGALQQFNETCTASPMLQPYISVIANSSFTVAGPPSALQGFADFMHDYMPRARIISIPIFAAYHSSLIYPTIPDSIIGNSSLLDQPRNPKSSLISTHTGLTVHDALTLRDYLHIAVHDILQHPVHLVTVLKSLRTQSRTDTSLTVLDNPDLFDARLFNLSAKEAAAMDPSQRLLLMTTYEALQMAGYSPGRGSSGRAHRVGTFVGQTSDDYRETNAGQDVGIFWTPGGMRAFGSGRLNHHFGWDGPSYSVDTACSSRGVNI…
Eurotiomycetes	Aspergillus_fijiensis_CBS_313.89_CBS_313.89_GCA_003184825.1	SAT-KS-AT-PT-xCP-xCP-Te	MEPRSRDILVVGDQSVDPNPFLVHALVKKPTPLLQAFLRDVQPLLRREIEGLPYGTRSLIPAFASLHELVEQYQRQGVHLASLDSALTCLAQFTHFIGVCEENPRAYLQPGTLIIGTCTGLLAASAIASSDSLIALIPLAVETVRLAFRLGATAARKAESLEASQTPWTSLVTGVDSTTVSVAVEEFNQTQGLRSSHRVYVSSVATNSIAVSGPPSLRARLFEASPLLQGVHHRTLPIHAPYHAPHLFAAESDILDAASIDILNRYHQIHTVCGFNASSTRSTSALFTECIDRILRECMDWNQLVTASLNSLAPLNAPSYRILSLGPTPLGNALASALKHEQPAGLKLTLEDHASWLATNSVPAYLSSSPAGCNIAIIGMAGRFPDAADHEAFWELLAQ…
Eurotiomycetes	Aspergillus_fijiensis_CBS_313.89_CBS_313.89_GCA_003184825.1	SAT-KS-AT-PT-xCP-xCP-Te	MEGPYRVYLFGDQTSDFETGLRRLIQAKNNTIVQSFFQQSFYALRQEISKLPPAQRKIFPRCTSLIDLLARYRESGPSPVLESAFTCIYQLGSFINYYGDLGNAYPSEGCQLVGLCTGLLSCAAVSASRNVGELLPAAVEAVLVALRLGLCVLRVRELVDSEASASSWSVLVSGLGEESASSLIEEYSIKTAIPPSSRPYISAVGSNGVTISAPPLVLDAFIENGLAGNYKHARVLIHGPYHAPHLYDSRDVDRILESFPEERLGHYTTHIPVLSSNTGTPIGASKIKEVLQVAIEEILLRRLCWDKVTESCISIVESANSQSCQLIPISTSATQSLHTAFKKAGVANISLETGIGDVSTTDKSNLSGKTECSKIAIIGMSGRFPDSESPEAFWEILQK…
Eurotiomycetes	Aspergillus_fijiensis_CY4_GCA_030014135.1	SAT-KS-AT-DH-xCP-xCP-MT	MTISVGVFCPQSRAPSASYLQSIRQFILTHPILQCLVTEIVTLKEVQTLLAMKNAAINRLPRALQYTDHLIQWLVAGDGDAAASTQSGIVALPRLVILQVAQYFQYLESQQITHADVIAQVRTAGGLQGYCGGLPAALALSCAASETEVGPLICTAIRLAYAIGLYAELGDDSTVPGATTIVVRLKSEGQAEDLVRHCRHTYISAITDPRSVSLVGPVDELAALQERASDLGLLVQAMDLRGKTHNPENMDLARELVAVCRESEMLQLPGPEHLKSPVRSNRTGDFITGRGSLSEEIVQTVLASRCEWYQLLCNVARGLQETGTPTHQIVSFGVGDVVPLMPFNKLGLRIEKQDWGAPKRRLGPEKLPSYPDDAIAIVGASCRLPGANTMEELWGVLSE…
Eurotiomycetes	Aspergillus_fijiensis_CY4_GCA_030014135.1	SAT-KS-AT-PT-xCP	MVTYTPPAEAQDLPNKLKVLYFSNEFPTDDLSTLLRRLHSHSKHSSHPILARFLSEATRVLRNEVSQLRVELGQLVPAFESVTTLAGETKLRKGPLAQSIDGVLLCVLQLGMYIGHCELYPEDRATETNSLLAGLGVGILVSTAVSVSTSLDDAVMAGVEVLRIAFRLGVFVADVSHNLEAVDAESSESWAYVVHGMTVDEAQTELDDIQAKERTPSASKIFVSAISETSVTVSGPPSRLKALFRNYASFRDRKFAHLPVYGGLCHAAHLYTREDAQAVVRSPSLPARYKPVVPVMSTSSGQPFLASSAAELFEQVIFEVLTKQIVWDNVIRGVVERVAKTDVHDVNIKVFRHSLPAQQLSTALTSAMTDLPVDSDDLLAWVGTDVDHGQYSPGSSMQS…
Eurotiomycetes	Aspergillus_fijiensis_CY4_GCA_030014135.1	SAT-KS-AT-PT-xCP	MATGFAGITNTGHRGGLWTAVRRGLRDTHAPHKLGGRRRDNQGANDVGDGSEHTLLLSTGNWNLPNNRPHREGGTAAAAGRGPWMSFGALQPWSQALDNLPPPQQALDNNSLNYNTTIQKDACQHKAQPNGSCSLQLSHSSFLCSIMAHHDSVSLVHFGDQTANLDSSLRALLRSAKRLPDLDQFLRRSTEVLQTGVRTLPVTSQAEWACRTLGDFLLAVEASVYEHRPAIVTVLLTICQLGYLYVYLEQKLPDFLQSAKRIMVGLFVQGSWAVSVSGVTEEQLRGALQQFNETCTASPMLQPYISVIANSSFTVAGPPSALQGFADFMHDYMPRARIISIPIFAAYHSSLIYPTIPDSIIGNSSLLDQPRNPKSSLISTHTGLTVHDALTLRDYLQIA…
Eurotiomycetes	Aspergillus_fijiensis_CY4_GCA_030014135.1	SAT-KS-AT-PT-xCP-xCP-Te	MEPRSRDILVVGDQSVDPNPFLVHALVKKPTPLLQAFLRDVQLLLRREIEGLPYGTRSLIPAFASLHELVEQYQRQGVHLASLDSALTCLAQFTHFIGVCEENPRAYLQPGTLIIGTCTGLLAASAIASSDSLIALIPLAVETVRLAFRLGATAARKAESLEASQTPWTSLVTGVDSTTVSVAVEEFNQTQGLRSSHRVYVSSVATNSVAVSGPPSLRARLFEASPLLQGVHHRTLPIHAPYHAPHLFAAESDILDAASIDILNRYHQIHTVCGFNASSTRSTSALFTECIDRILRECMDWNQLVTASLNSLAPLNAPSYRILSLGPTPLGNALASALKHEQPAGLKLTLEDHASWLAANSVPAYLSSSPAGCNIAIIGMAGRFPDAADHEAFWELLAQ…
Eurotiomycetes	Aspergillus_fijiensis_CY4_GCA_030014135.1	SAT-KS-AT-PT-xCP-xCP-Te	MEGPYRVYLFGDQTSDFETGLRRLIQAKNNTIVQSFFQQSFYALRQEISKLPPAQRKIFPRCTSLIDLLARYRESGPSPVLESAFTCIYQLGSFINYYGDLGNAYPSEGCQLVGLCTGLLSCAAVSASRNVGELLPAAVEAVLVALRLGLCVLRVRELVDSEASASSWSVLVSGLGEESASSLIEEYSIKTAIPPSSRPYISAVGSNGVTISAPPLVLDAFIENGLAGNYKHTRVLIHGPYHAPHLYDSRDVDRILESFPEERLGHYTTHIPVLSSNTGTPIGASKIKEVLQVAIEEILLRRLCWDKVTESCISIVESANSQSCQLIPISTSATQSLHTAFKKAGVANISLETGIGDVSTTDKPNLSGKTECSKIAIIGMSGRFPDSESPEAFWEILQK…
Eurotiomycetes	Aspergillus_fischeri_NRRL_181_NRRL_181_GCA_000149645.4	SAT-KS-AT-DH-xCP-xCP	MASTLPSAVVCGSQTPPPSRDCLQRIQSNLKDPKLKELAKAVDDLPRFWSRLVEVKPVLSQVNDEPLKKLKDWAKDESFLKIPEGLPNILLAPLTVIIHLVQYLQFAHSLDANDSQEDRHQRILQSTSKGGFQGLCTGFLSAAALACSRTQRDIWCNATVALRLATCVGAYVDLDRLTYDSTDVHTCMIIHWEDNCGRDRVTEVLKGYPGVYTSVELDDRSITVTAKQSQVSSLRADLTARDTKLTKIPIHGRYHSRTHAEILQDLLEICSNEETLRFPIISTPLVPLRNNTTGGLITSAEKLHELALKCVLTEPADWYSTMTETVSSLVSQPETNEQSLILEVGLVSCLPRSLTASANLRFFTPLLTSTVSPNEEEWSVNDEYRYDYPEHSIAVIGAA…
Eurotiomycetes	Aspergillus_fischeri_NRRL_181_NRRL_181_GCA_000149645.4	SAT-KS-AT-PT-xCP	MTNPQPPPILDFSVFYGNDSQAKAQLVQRVRECCLNNGFFQITGHKVSPELQRRTFDCAKQFFDLPLAEKMKIERSPNAFNRGYEAFQSHMSQPGSAPDRKEGLFLGPDLPESHPYCVQRKLNCGPNRWPQGLDDLEEFKHISMEYYDAMFQLAKDIFAVLALTMDYDETFFDPLTEGAVATLRYLHYPPQPVREAEKGLGTGAHRDYSCITLLLQDGTGGLQVLDEPTGQWLDVEPVPGAYIVNLANVFSRMTNENYKSALHRVINKSGLERYSIPFFFTGNPDYVCECLSRFRKEGEPVKYPPATVHEVVGEAVRATVERAKRYNAERQGIHAEQPRNMDQYANLFAFEDYLGAQARAIPDLPEVDVLSPRVMRVLGGNPGQMQLQGTNTYILGTGA…
Eurotiomycetes	Aspergillus_fischeri_NRRL_181_NRRL_181_GCA_000149645.4	SAT-KS-AT-PT-xCP	MDWTETPNTEPSLVTATPSTTESLVDPAKMKVGYFGNEFPHDDLHDLSRRLYNWSKDRQHTLLATFINEATAAVRQEVRLLPATLRALIPPFETIFSLVSHADLRHGPLGGCIDGMLLCAVQLATFIGYYEDSTEDTFHWHNADACLAGLGTGLLSTVAVSVSPTLADMPVTGAEVVRIAFRLGILVHEVSRNLQAPTSDGGPGDSWAYVVPDAIAVDVQSELDAFHDAKKTPESSKVFISALSRTSVTISGPPTRLKDLFLVSDYFRDRRFVPLPVYGGLCHANHVYTKEHVDRIVNTDSSALVSLDSRLAPRVPIFATSNGKPFPAKTVSGLFRNIVEELLTQRIEWDNVIEGVIQQAKCTAVSETLVFMFRTSLPVRDLVEALNSESLPFKGRTQD…
Eurotiomycetes	Aspergillus_fischeri_NRRL_181_NRRL_181_GCA_000149645.4	SAT-KS-AT-PT-xCP	MRPVDFTPSSESPTAEKGMKLVYFGNELPQDGLQGICRRLHAYTKDRRYPLLARFIEESTWAVHDEVRQLHAAQKALVTPFESVLHLAEQPELCRGPLCGSIEGVLLSVIQLGTFIGYYETSPDEYAFDSAHTYLTGLGLGLLASTAVSLSPTLADLPLAGAEVVRVAFRLGVLVADVSQNLQPADATGDRGSWAYVIPNVTPSEAEEELTAIHTRENTPEASRIFISAISRTSVTISGPPARLRRLFRMSDFFRDRTFVALPVYGGLCHAKHIYSSQHARSVVQGPSIAALDTRFIARYPILSTGSGEPFPTATTATELFEHVITEILTQAIEWENVVQGVVERAKLLSVSEVQVQVFRISLPVHDLLSALQTSLREGVEVTIKDLDPWITKTRDDER…
Eurotiomycetes	Aspergillus_fischeri_NRRL_181_NRRL_181_GCA_000149645.4	SAT-KS-AT-PT-xCP	MATPRGQTVWFGNEFPNDDLKDLFRRLHQHSKDRRFRLLSVFLDESTAILKEEVANLPQQLQELVPHFDTACTLPEVDFRQGPLGAAMESALLTILELGMLIGNYEAEDIEWDLDPSQTILAGLSIGIIAGAAVALSSSLADVAKVGAESVRVSFRLGVYVADISTKLEAPQSDGTLQSWAHVVTGMSHEAVQEELSQFNAVTQNPEITKVFVSAADKTSVSVTGPPSRIKAAFQHSPSLRYSKSLPLPVYDGLCHAPHLYSQDDIEIVINSAKSVIPTSRPVRLPLISSQTGKPFEAKTAGELFLEIGTELLTGTIYLDNVTAGILEHVKLKEPTGNYQIISFRMSQVLNGIQAAIETDFPALGRARRDLVSWVHGDYGARRPSSYAASKLAIVGMAC…
Eurotiomycetes	Aspergillus_fischeri_NRRL_181_NRRL_181_GCA_000149645.4	SAT-KS-AT-PT-xCP-xCP-Te	MEDLRRIYLFGDQTISCDEGLRNLLQAKNHTIVASFIERCFHALRQEITRLPPSQRTLFPRFTSIADLLARHRESGTNPALGSALTCIYQLGCFIDYHGDRGHPYPSSDDGLLGSCTGMLSCAAVSSCKNVGELLPLAVEVVTLTIHLGLCVMRVREMVDSTESSSGSWSILVSEINEADAANLVGNFVKKRVSTVYDHWKKILTHQGITPSSQPYISAVGSKGLTISAPPDILDKFIEEGLPKEYKHFKAPGVSGPYHAPHLYNDRAIRDILGFCSDNVILRHTPRVPLVSSNTGKLVQVKSMRDLLKVALEEILLRKICWDKVTESCLSIVQAANDKPWRILPIASNATQGLVTALQRMGNCQVEVDTGVGAPQMDPAAPNATGNASRSKIAIIGMS…
Eurotiomycetes	Aspergillus_fischeri_NRRL_181_NRRL_181_GCA_000149645.4	SAT-KS-AT-xCP-MT-Red	MGSLAKQNMVQNVFLFGPQALSLDGDDIKTLRETLHSTPSNRWALDCLSELPDLWDVVAKNVSQLESFDGKPLLKKFVDEFNAGSTSPSTFPLPNILTTPLVVIMHLTQYSKALRDTWPRLKDDDPLPADFMQESVAAGLCTGMLGAMAASHSGTLQSLATNSGKAVRQAMAIGAMVDAEMASDGSDGRAVSFSVSWGAGRTLDSVKKLIQPFPNTYISVIMDERRATITVSEKLAVAFAQTLKAAGVYVVRLELAGRFHWPGHAENAKQLAQLFASNEKFHLSSPRHMMFHSDMSSLSRDSLVEVTVLRGILLEQSDWFSSFSQLVDPSILDASQGRIINIGPERCVPPTLASMLNSRVTRIGETSLAKPGIAPHIIHGDEQIAVVGMSCHVPGAEDL…
Eurotiomycetes	Aspergillus_flavus_2017_Washington_T2_GCA_003953715.1	KR-KS-AT-DH-xCP-xCP-MT	MTINEMIHRLDWMSAELSTEPLNFRKVVFLAADEDSRERLSRYQAQLAGEGLTTVFIGHATEITPLLTPDTIVVHIPHVAREKSGVYEAVTKSCTSLIAAAQVLYHHNQDSRDRTSRLFSLISRDSGTDGLEYAPLYGLARVMKTEMAEGFGGLFDEDQGYFPLSAFKYAQGFDVVRICQGVPQTASLQPSQDQLNDQKQLQLRENSTYLITGGTRGIGLEIATWLGERGARNLLLVSRGGLTPALGRNAKNADHEKLVSRISKLKDMGISVHVLSIDFGKPEAETLLRQAIDELNIPRIKGVVHAAGVAGFHTLQHCSPSYVADVLAPKVRGSLALDKLFPPGTLDFFFFMSSIGQLIGFPGQLSYAPANGFMDGLAAHRRRRGDNSMSILWTAWRGV…
Eurotiomycetes	Aspergillus_flavus_2017_Washington_T2_GCA_003953715.1	SAT-KS-AT-PT-xCP	MIENTTITPSESRSPSPSHANIDMDANIPEEFILFSHELPSGEIQDLIRRLHRYSMLPGYPHLARFLQNCALVLRTEVQKLPRPLRDSVPPFHDVVTLASHWDDFKSSSLSGAWDGAFLCIYEIAMLIGHHETLDTSYRRPACLVGISVGLFSAAAVAVSESLSDLVSYGAESVRTAFAFCVHVQRVSQTLEPTVTEQATSVSWATVVIGVPVEIIREELDRFNHQEELQRTGTNTMPLTGVSISHVDNTSVGITGPPTRLKQLFRESEILRSSRHSELPISGGLCHVPNVYDYDDVRSILATAEVWERWGTRATQVPLISPFTGSPFQCSDAYHLIEAICTEALTKPLFFDKVANGVVTQLSGGQRPDMQSCQILHYRASVMSDTIVADVAEDLSTRD…
Eurotiomycetes	Aspergillus_flavus_2017_Washington_T2_GCA_003953715.1	SAT-KS-AT-PT-xCP	MRIFHFSNKFPPDDLADLFRRLRLHSKCPNHVILARVLEEVTDVVREEIAELPAELRSLLPPFQSILDLAESFNWHQGPLSGTFECVFLVLMPVCLFVGHYESRPDEFVFRRDTSLFTGLGLGFLAATAIVASPSLCSVPVTVAEVVRMAMRTGLLIYQRSQDLEPQSLDGALESWTSIVKGMGEVAVREGIDEYNSSTDTPQPSSIYISVVEPDGSVFINGPPSRLRKFFSTSGKVQSAAHAPLPVYGGPCHAPYLYDHSHSSWAVKKCRAKVLSRDLSHAAYLLSMADGNPLKADTVLELFESATYILLTSIIRWGDVVNAITASSPLLEKDMKLQVEILRPSPVVDGLVSAIQKSHPGCSAYVVDLGEWIFDDTHISPHGAHEKIAVIGMSCRLPG…
Eurotiomycetes	Aspergillus_flavus_2017_Washington_T2_GCA_003953715.1	SAT-KS-AT-PT-xCP-Te	MVVEERKQIIVFGDLTCDSVAGLRTLVTVKDNPLLISFFERVTSGLREEIGLLPFSQRQRFIRFTTFEELLARVQRSTCPHPALEKALACTYQLACFIRQYTSPGHKYPSTQQTCLVGLCTGLLSAAAVGCCQSITDLLPLATHTVLIAFRAGLFVADVRDRLEPQTGAPLAWSVLIPGLDGDTASLTLQKYNEEKGLPATSAPYISTYANTGVTLSGLPSALNDLLDSSCLPKNRALTIPIYAPYHASHLYGQKNIESILRKASATEFASYQCQFSILSSITGQSIQVDTFGALIDYALNAILREPLRLDRIVSSLGEALLSDSPIRGCTILPIATVIGQSLAAALRKHGAPDITVDPCMNSSIAVRDDRTSTTGHLGHSKLAIIGYSGRFPDANNNE…
Eurotiomycetes	Aspergillus_flavus_2017_Washington_T2_GCA_003953715.1	SAT-KS-AT-PT-xCP-Te	MHQIPVFAGLGSDALFSERTLGTAAEDARTSEGQIILRACHDIFVKEITSVIHSQRLPSDIKLEDFVEPESLIRPQACYQRNSIIQHVSLYTIQLLRYLRYSTEKPGVILGVAGFCAGLLPGAALATSRNTIELLSRGQDFFYVALHVGIRIESYKQVMMGKETCPPHLPCSLVVDGITAQHARELLEEHNRRSPASYIYLSAINSDTCVTLSGRGDHLQQFSQSSVPSQCKIRPTNIFSLYHDRHQLEGVRRDILQDLRNNILLFSTPLHLIAPLFSNIDGKPIDSGQLATLEELCEKLLEMMILEPVNWVAVEDNVLAAIKQPATAVDASFEILNFGPGYGISGARYTLPDNVNIVAASIVEPRPSLQDTTGMLSSNDIAIVGMGVDLPGASNTDAL…
Eurotiomycetes	Aspergillus_flavus_2017_Washington_T2_GCA_003953715.1	SAT-KS-AT-PT-xCP-Te	MAQSRQLFLFGDQTADFVPKLRSLLSVQDSPILAAFLDQSHYVVRAQMLQSMNTVDHKLARTADLRQMVQKYVDGKLTPAFRTALVCLCQLGCFIREYEESGNMYPQPSDSYVLGFCMGSLAAVAVSCSRSLSELLPIAVQTVLIAFRLGLCALEMRDRVDGCSDDRGDPWSTINVPQTRRPWISCISKNAITLSGSPSTLRAFCAMPQMAQHRTALIPICLPAHNGALFTQADITTILDTTPTTPWEQLPGQIPYISHVTGNVVQTTNYRDLIEVALSETLLEQVRLDLVETGLPRLLQSRQVKSVTIVPFLTRMNETMSNILPVSFISTETRTDTGRAIPASGRPGAGKCKLAIVSMSGRFPESPTTESFWDLLYKGLDVCKEVPRRRWDINTHVDP…
Eurotiomycetes	Aspergillus_flavus_2017_Washington_T2_GCA_003953715.1	SAT-KS-AT-PT-xCP-xCP-Te	MEGPRGVYLFGDQTSDFDAGLRRLLQVKNNTIVASFFQRCFHALRQEIARLSPSERKIFPRFTSIVDLLARHRESDPNPALESALTCIYQLGCFINYYGDLGNVYPSASDCHIVGLCAGLLSSAAVSCSNNVGELLPAAVEAVVVALRLGLCVLKVRELVSSDQASSTSWSVLISGISEKDASQLIGEFTAERAIPPSSKPYISAVGYNSITISAPPKVLDDLIDSRLSKSHKPVRAQIHGPYHAAHLYDGRDVDRIIESCHNEVVSNYTPRIPVLSSTTGQPIEAKHMKDLLKAALEEILLRQLCWEKVTDACYSILKTARHQPCKLFPISSTATQSLFTALTKAGITDIEVENGLGDVPTNPKDNLNISGRADCSKIAIIGMSGRFPEADGTESFWD…
Eurotiomycetes	Aspergillus_flavus_2017_Washington_T2_GCA_003953715.1	SAT-KS-AT-PT-xCP-xCP-Te	MVNIYIFGDQTVRVDDAVHKLLHVKNNPILKSFLDESFAAIRKQIFRLPANERTSLPDAHTLPLLLEAVRRGRRHVALESALVCLCEIGQYIALLQTTDLCHPPTGSILVGFCTGSLAAAAVSCARTSIDLLTLGIEAVVVAFRVGMHVARRANALGGDGGSQWKPWSLAVTDGSESETEKILEEFTRDEVSGVHVANRHDAYILAKGLPAIMKPYVSAAGSNTLTISGTPRVLEALKASPHLRGTKSLPVSIYAPYHATHLYNEADVESIFACKPVESALFHRELRTPLISCATGTVLKEKTFGDLLRALVMEILTCQIRFDKVEESIVPHTPGATAQLIPIHTNIAPRMKTSLTQVGLQVECFKAIANQEPAAEALSESPSNDSSKIAIIGFSGRFP…
Eurotiomycetes	Aspergillus_flavus_2017_Washington_T2_GCA_003953715.1	SAT-KS-AT-xCP-MT-Red	MVNSGSNIKSESLTLVFGPQDPNLDNTFLQSLRTTLLETPELQWILETLTQLPQEWQKISDAHSELAAFQGQRYLQLLNEWVRRGTLPSNLFPLPNILVTPLVVTTQLTQYTKFITQLNPGITSNDSLQGALKLDTETAGLCTGLISSAAVAISGTLAELQKHGAAAIRIATAIGALVDAGDSEREDGDKWESLAVGWTAHGTESKLESIVDGSPEAYVSVISEARLATLTVLKADTPELLEKLKAAGVIFTKTALRGPFHCGKRKDQAASLLQLFDSDPSFQFPHASQLAFSTRSADSGKFRIEDKLHHEAARAMLTDKADWHKLFTALHESTSTRPSLTICFGSQRFVPQWFLRKLGPKLAYAADLDANPGQLPPALGALLGPIEDDAIAVVGMACH…
Eurotiomycetes	Aspergillus_flavus_2017_Washington_T2_GCA_003953715.1	SAT-KS-AT-xCP-MT-Red	MLSQLEPPPGGKTVLIFGCQCLSFNFDDFHRLRATVLETPEHRWIQDVLSELPVYYRTASTTYVQKLKNIPGTQQLRNLAEWFRTGQVPTDSFPLPYIQLAPLLVITHFTEYWQYLRIRHHKGPTSVKESSAESPVVEIVGFCIGFLSAAVVSAARNQEQLSKYAAVALRLATLMGALGDAQEREEEYTSLATVWKAAELENRLPLVLEAFPESYVTVRFDTNRVTIMTPRRTIKQLENELQSAGFNTTQVEFNGRYHWAGHEDTLHALGRMCDSDPALQLPDTSQSVVPTRPNIPMDTPPKGPLHELVLWSILAKQCQWLDTFSKVYQAHLEDTASLIIEFGPERCIPPTYMRKLQGRTVHFADLDLNTLSRTPPLYQTPRSYDSDIAVVGIACRVAG…
Eurotiomycetes	Aspergillus_flavus_2017_Washington_T4_GCA_003953615.1	KR-KS-AT-xCP-xCP-MT-Te	MTINEMIHRLDWMSAELSTEPLNFRKVVFLAADEDSRERLSRYQAQLASEGLTTVFIGHATEITPLLTPDTIVVHIPHVAREKSGVYEAVTKSCTSLIAAAQVLYHHNQDSRDRTSRLFSLISRDSGTDGLEYAPLYGLARVMKTEMAEGFGGLFDEDQGHFPLSAFKYAQGFDVVRICQGVPQTASLQPFQDQLNDQKQLQLRENSTYLITGGTRGIGLEIATWLGERGAHNLLLVSRGGLTPALGRNAKNADHEKLVSRIAKLKDMGISVHVLSIDFGKPEAETLLRQAIDELNIPRIKGVVHAAGVAGFHTLQHCSPSDVADVLAPKVRGSLALDTLFPPGTLDFFFFMSSIGQLIGFPGQLSYAPANGFMDGLAAHRRRHGDNSMSILWTAWRGV…
Eurotiomycetes	Aspergillus_flavus_2017_Washington_T4_GCA_003953615.1	SAT-KS-AT-PT-xCP	MIENTTITPSESRSPSPSHANVDMDANIPEEFILFSHELPSGEIQDLIRRLHRYSMLPGYPHLARFLQSCALVLRTEVQKLPRPLRDSVPPFHNVVTLASHWDDFKSSSLNGAWDGAFLCIYEIAMLIGHHETLDTSYRRPACLVGISVGLFSAAVVAVSESLSDLVSYGAESVRTAFAFCVHVQRVSQTLEPTVTEQATSVSWATVVIGVPVEIIREELDRFNHQEELQRTGTNTMPLTGVSISHVDNTSVGITGPPTRLKQLFRESEILRSSRHSELPISGGLCHVPNVYDYDDVRSILATAEVWERWGTRATQVPLISPFTGSPYQCSDAYHLIEAICTEALTKPLFFDKVAKGVVTQLSGGQRPDMQSCQILHYRASVMSDTIVADVAEDLSTRD…
Eurotiomycetes	Aspergillus_flavus_2017_Washington_T4_GCA_003953615.1	SAT-KS-AT-PT-xCP	MRIFHFSNKFPPDDLADLFRRLRLHSKCPNHVILARVLEEVTDVVREEITELPAELRSLLPLFQSILDLAESFNWHQGPLSGTFECVFLVLMPVCLFVGHYESRPDEFVFRRDTSLFTGLGLGFLAATAIVASPSLCSVPVTVAEVVRMAMRTGLLIYQRSQDLEPQSLDGALESWTSIVKGMGEVAVREGIDEYNSSTDTPQPSSIYISVVEPDGSVFINGPPSRLRKFFSTSGKVQSAAHAPLPVYGGPCHAPHLYDHSHSLWAVKKCRAKVLSRDLSHAAYPLSMADGNPLKADTVLELFESATYILLTSIIRWGDVVNAITASSPLLEKDMKLQVEILRPSPVVDGLVSAIQKSHPGCSAYVVDLGEWIFDDTHISPHGAHEKIAVIGMSCRLPG…
Eurotiomycetes	Aspergillus_flavus_2017_Washington_T4_GCA_003953615.1	SAT-KS-AT-PT-xCP-Te	MHQIPGFAGLGSDALFSERTLGTAAEDARTSEGQIILRACHDIFVKEITSVIHSQRLPSDIKLEDFVEPESLIRPQACYQRNSIIQHVSLYTIQLLRYLRYSTEKPGVILGVAGFCAGLLPGAALATSRNTIELLSRGQDFFYVALHVGIRIESYKQVMMGKETCPPHLPCSLVVDGITAQHARELLEEHNRRSPASYIYLSAINSDTCVTLSGRGDHLQQFSQSSVPSQCKIRPTNIFSLYHDRHQLEGVRRDILQDLRNNILLFSTPLHLIAPLFSNIDGKPIDSGQLATLEELCEKLLEMMILEPVNWVAVEDNVLAAIKQPATAVDASFEILNFGPGYGISGARYTLPDNVNIVAASIVEPRPSLQDTTGMLSSNDIAIVGMGVDLPGASNTDAL…
Eurotiomycetes	Aspergillus_flavus_2017_Washington_T4_GCA_003953615.1	SAT-KS-AT-PT-xCP-Te	MVVEERKQIIVFGDLTCDSVAGLRTLVTVKDNPLLISFFERVTSGLREEIGLLPFSQRQRFIRFTTFEELLARVQRSTCPHPALEKALACTYQLACFIRQYTSPGHKYPSTQQTCLVGLCTGLLSAAAVGCCQSITDLLPLATHTVLIAFRAGLFVADVRDRLEPQTGAPLAWSVLIPGLDGDTASLTLQKYNEEKGLPATSAPYISTYANTGVTLSGLPSALNDLLDSSCLPKNRALTIPIYAPYHASHLYGQKNIESILRKASATEFASYQCQFSILSSITGQSIQVDTFGALIDYALNAILREPLRLDRIVSSLGEALLSDSPIRGCTILPIATVIGQSLAAALRKHGAPDITVDPCMNSSIAVRDDRTSTTGHLGHSKLAIIGYSGRFPDANNNE…
Eurotiomycetes	Aspergillus_flavus_2017_Washington_T4_GCA_003953615.1	SAT-KS-AT-PT-xCP-Te	MAQSRQLFLFGDQTADFVPKLRSLLSVQDSPILAAFLDQSHYVVRAQMLQSMNTVDHKLARTADLRQMVQKYVDGKLTPAFRTALVCLCQLGCFIREYEESGNMYPQPSDSYVLGFCMGSLAAVAVSCSRSLSELLPIAVQTVLIAFRLGLCALEMRDRVDGCSDDRGDPWSTIVWGLDPQQARDQIEVFCQTTNVPQTRRPWISCISKNAITLSGSPSTLRAFCAMPQMAQHRTAPIPICLPAHNGALFTQADITTILDTTPTTPWEQLPGQIPYISHVTGNVVQTTNYRDLIEVALSETLLEQVRLDLVETGLPRLLQSRQVKSVTIVPFLTRMNETMSNILPVSFVSTETRTDTGRAIPASGRPGAGKCKLAIVSMSGRFPESPTTESFWDLLYKG…
Eurotiomycetes	Aspergillus_flavus_2017_Washington_T4_GCA_003953615.1	SAT-KS-AT-PT-xCP-xCP-Te	MVNIYIFGDQTVRVDDAVHKLLHVKNNPILKSFLDGSFAAIRKQIFLLPANERTSLPDAHTLPLLLEAVRRGRRHVALESALVCLCEIGQYIALLQTTDLCHPPTGSILVGFCTGSLAAAAVSCVRTSIDLLTLGIEAVVVAFRVGMHVARRANALGGDGGSQWKPWSLAVTDGSESETEKILEEFTRDEVSGVHVANRHDAYILAKGLPAIMKPYVSAAGSNTLTISGTPRVLEALKASPHLRGTKSLPVSIYAPYHAAHLYNEADVESIFACKPVESALFHRELRTPLISCATGTVLKEKTFGDLLRALVMEILTCQIRFDKVEESIVQHTPGATAQLIPIHTNIAPRMKTSLTQVGLQVECFKAIANQEPAAEALSESPSNDSSKIAIIGFSGRFP…
Eurotiomycetes	Aspergillus_flavus_2017_Washington_T4_GCA_003953615.1	SAT-KS-AT-PT-xCP-xCP-Te	MEGPRGVYLFGDQTSDFDAGLRRLLQVKNNTIVASFFQRCFHALRQEIARLSPSERKIFPRFTSIVDLLARHRESDPNPALESALTCIYQLGCFINYYGDLGNVYPSASDCHIVGLCAGLLSSAAVSCSNNVGELLPAAVEAVVVALRLGLCVLKVRELVSSDQASSTSWSVLISGISEKDASQLIGEFTAERAIPPSSKPYISAVGYNSITISAPPKVLDDLIDSRLSKSHKPVRAQIHGPYHAAHLYDGRDVDRIIESCHNEVVSNYTPRIPVLSSTTGQPIEAKHMKDLLKAALEEILLRQLCWEKVTDACYSILKTARHQPCKLFPISSTATQSLFTALTKAGITDIEVENGLGDVPTNPKDNLNISGRADCSKIAIIGMSGRFPEADGTESFWD…
Eurotiomycetes	Aspergillus_flavus_2017_Washington_T4_GCA_003953615.1	SAT-KS-AT-xCP-MT-Red	MVNSGSNIKSESLTLVFGPQDPNLDNTFLQSLRTTLLETPELQWILETLTQLPQEWQKISDAHSELAAFQGQRYLQLLNEWVRRGTLPSNLFPLPNILVTPLVVTTQLAQYTKFITQLNPGITSNDSLQGALKLDTETAGLCTGLISSAAVAISGTLAELQKHGAAAIRIATAIGALVDAGDSEHEDGDKWESLAVGWTAHGTESKLESIVDGSPEAYVSVISEARLATLTVLKADTLELLEKLKAAGVIFTKTALRGPFHCGKRKDQAASLLQLFDSDPSFQFPHASQLAFSTRSADSGKFRIEDKLHHEAARAMLTDKADWHKLFTALHESTSTRPSLTICFGSQRFVPQWFLRKLGPKLAYAADLDANPGQLPPALGALLGPIEDDAIAVVGMACH…
Eurotiomycetes	Aspergillus_flavus_2017_Washington_T4_GCA_003953615.1	SAT-KS-AT-xCP-MT-Red	MLSQLEPPPGGKTVLIFGCQCLSFNFDDFHRLRATVLETPEHRWIQDVLSELPVYYRTASTTYVQKLKNIPGTQQLRNLAEWFRTGQVPTDSFPLPYIQLAPLLVITHFTEYWQYLRIRHHKGPTSVKESSAESPVVEIVGFCIGFLSAAVVSAARNQEQLSKYAAVALRLATLIGALGDAQEREEEYTSLATVWKAAELENRLPLVLEAFPESYVTVRFDTNRVTIMTPRRTIKQLENELQSAGFNTTQVEFNGRYHWAGHEDTLHALGRMCDSDPALQLPDTSQSVVPTRPNIPMDTPPKGPLHELVLWSILAKQCQWLDTFSKVYQAHLEDTASLIIEFGPERCIPPTYMRKLQGRTVHFADLDLNTLSRTPPLYQTPRSYDSDIAVVGIACRVAG…
Eurotiomycetes	Aspergillus_fructus_NRRL_239_GCA_027569115.1	SAT-KS-AT-PT-xCP	MKENTHSTSLVFFGNEFPNDDLKELFRCLLRLSRDRRFRQLAAFLEESTLVLKKEVAALPQQLRDIVPHFHTILPLAELGDFRQGPLGAAMESALLTVLELGMFIGHYEAEGRGWDLFPHNTILAGLSIGLLAAAGLALSTNLAEVAQNGAECVRVSFRLGVYVSEISRKLEAPQADGTLLSWAHVVTGETKSAIQDELTQYNSESCTPELLKVFISAADKTSVSSFALPVYDGLCHASHLYNEDSINTVINSAESLIPNSRPVRLSLHSSNTGQPFLATTAHELFQAIGTELLTGAIYLDSITDGILERIGNFSQSQCRIETFRTSIVFRSILAAVKAQFPSLEIKLVDLIPWSLRDYGTLQPRSFAHSKLAIVGMACRMPGGGNNTELFWEILEQGR…
Eurotiomycetes	Aspergillus_fructus_NRRL_239_GCA_027569115.1	SAT-KS-AT-PT-xCP	MSVYTPQSGSQAEYSKMKLLYFSNEFPKDDLQGLFRRLYNHSKDRRHPILARFIDEATLAVRDEVRQLPTSVKSLVPAFETVLNLADYPELRKGPLSGSLDGVLLCVLEIATLIGYYENTPDRFDLHNVSTYLAGLGLGLLSTAAVSLCSTLADLPVTGAEVVRVSFRLGTLVDEISQNLEPRDTSGSPDTWASVVPGAKVEEVQAELDAIHARENTPQPSKIFISAWGEGSVTISGPPSRIKRVLRLSEFFRRHKVVSLPVYSGLCHAKHLYNEQHARAIISTKTIDFIDTVYSPTVPIYQTSTGKHFTCSTAKELFEKLVLELLTQPILWDNVIQGVVDQAYTISATNCEVLVFRISVPINDLRTALSSKLLGFEASTEELIPWTLEKPSNESPRGT…
Eurotiomycetes	Aspergillus_fructus_NRRL_239_GCA_027569115.1	SAT-KS-AT-PT-xCP	MDPRHPRLVFFGNEVPSDGAKDLFRRLRQHSKDRRFRLLSIFLEESTAILKEEAAKLPKQLQELIPHFDTVCSLADVDFRQGPLGAAMESALLTVLELALFIGHYEAEVSEWDLDPSKTILAGLSIGILAGAAVSLSSNVADVAKVGPESVRVSFRLGVYVAGISSKLEAPQSDGTLQSWAHVITEMPQDAVQHELSQFNEGVNNPELTKVFISAADSTSVSVSGPPSRVKAAIQYSPVLRYSKQLPLPVYDGLCHASHLYSEGDIESVINSSDSVISNSRPVRLPLISSQTGAAFKARKARELFLEIGTELLTGTIYLDKVTAGIVEHAKLHSEMGSYRIDTFRTSLVLQGIHSAIAVSLSQLSLSRNDLVSWVSKDFGPDRPSSYAASKLAIVGMAC…
Eurotiomycetes	Aspergillus_fructus_NRRL_239_GCA_027569115.1	SAT-KS-AT-PT-xCP-xCP-Te	MASQADSTRLFLFGDQTYDFVPELRDLLAIRNNPILVAFLEQSHYVIRAQMIQKLTPKEHKQARTASLAEVLQKYVDGRLPSAFQTALSCITQLGFFMRQFDDPAIPYPRFNDSYVLGVCTGSLAASAISCSTSLSELLPIAVQTVLVSFRLGLCAQEVRDHLEISDVNHTKPWSVVSDISPDEAAIAIERFSNQKALPNVRQPWITATSTKTTTVSGSPDILADLATQPRLKDSKRWMGIPIYVPAHNPHLFSSKDVDNILETTNESYWGTYGSKIPFLSSVTGKLVWVRNYRDLLHLALKQCLIEPIRWELVETELPRLLKARGGVDTVSIVPLATTLTKSLSAALTSEGVTVGEAHSTSAQIPERYSHRPGSDRSKLAIVSMSGRFPEAPSTDSFW…
Eurotiomycetes	Aspergillus_fructus_NRRL_239_GCA_027569115.1	SAT-KS-AT-PT-xCP-xCP-Te	MLTIGSYHGDLGHAYPSNASTQLVGLCTGLLSCAAVSSASNIGELLAPAVEAVVVALRLGLCVRRVRELVDQEMAAPLSWSALVSGINEADGMDLISDFNIQKAIPPSSRPYISAVCANTLTISGPPAVLNQFLDTTIPKQNKAIRVPIHGPYHASHLYDDRDVGRILEHCDTDLVCNRQPHIPVLSSNTGELITAESMRDFLKVALEEILLRQMCWDKVTDSCAAILNSVNERTSKKLLPISTSAIQSLFNSLKKENVSNIDVDGSVTDITSPGPANNHTGRAELSKIAIIGMSGRFPDSDSPQDFWNLLYKGLDVHRKVPEDRWDADAHVDLSGTGRNTSKVQYGCWIREPGLFDPRFFNMSPREALQADPAQRLALLTAYEALEGAGFVADSTPST…
Eurotiomycetes	Aspergillus_fructus_NRRL_239_GCA_027569115.1	SAT-KS-AT-PT-xCP-xCP-Te	MSPTRVLLFPHERATLEAVHDLNVRSKSRRRLQALLTDTSTVVQRHTASLDELERASIGPFEDLVELAERHATHKGSIVADLVLLTTVQIGQLLVLAEDQPAILSENRVPLAFGAGLLAAGVAVAASTVDEIVTLGREAVSTAFRLGLALQRRGKDIEDSDEPWVRVVSSTISVADLEQTLERFNALISPMNRVYIGQALTESNVVFGPPSTLYAFAKTPEIAAAITSRPVLDKAPMHGSHLPTVDAASILTHSVNGKVRELWNLAVDQVAHQRIHIEETVAGLVNHLQPNTAIILTSIGSEASSITSLLEKSSLIVQTSQLSPPPKPYGDSLNTIPADAIAVVGMSGRFPDSDTLDEFWKLLENAQTTHQVIPSSRFNVDDFYDPTRAKHNALLARYG…
Eurotiomycetes	Aspergillus_fructus_NRRL_239_GCA_027569115.1	SAT-KS-AT-xCP-xCP-MT-Red	MAPYTVLLFGSQALSFDEKAFAEIRDAVRNDPYNQWVIDVVSKLPETWAMFIQRFPQLDVIKGSQSLEELNRWLSSGEVSPITRTLPNVLLSPLVVISQLTQFTQYLRIVHPDAGSGEDIYSNIGQETETVGFCTGLLSALAVATATSKGQFEQNAATAVRLATLIGAFVDAQETSNAHKASISLATAWNSLGAKQEMTRILNEFPEAYVSVLYDKNRATVTTAASSSKSLQDKLRAAGVIATEMNLVGRFHSDCYNDDIQQILDFCDANSTLQFPDASRLVTAVRSNDGGLITGGKLHYSALQSILVEQSYWYETFEAVHASRLGDKQATVVGFGPERCVPPSLLRSVTDQVVYMTNPQSAKARLLQGTSKPHSPPKYPKGYSDNDIAVVGYSLKVAN…
Eurotiomycetes	Aspergillus_fumigatus_08_19_02_30_GCA_040142875.1	SAT-KS-AT-DH-xCP-xCP	MASTLPSTVVCGSQTPPPSRDCLQRIQADLKDPKLKELAKAVDELPEFWSHLVEVKPVLSQVNDAPLKKLKDWAKDESVLNIPEGLPNILLAPLTVIIHLVQYLRFAHSLDANDSQEDQHQRILQSTSKGGFQGLCTGFLSAAALACSRTRSDIWCNATVALRLATCVGAYVDLDRLTYDNTDVHTCMIIHWEDNCGKDQVTEVLKGYPGVYISVELDNRSITVTAKQSQVSLLRGDLAARGAKLTRIPIYGRYHSRTHAEILQDLLEICSNDESLRFPIISAPIVPLRNNTTGGLITSAEKLHELALKCMLTEPADWYSTMSETVSSLMLQPVINEHPLILELGHVSCLPRSLTASANIRAFTPLLTLTASPNEPDASRYDYPEHSIAVIGAACKFTG…
Eurotiomycetes	Aspergillus_fumigatus_08_19_02_30_GCA_040142875.1	SAT-KS-AT-PT-xCP	MRPVDFTPSSESPTAEKGMKVVYFGNELPQDGIQGICRRLHTYTKDRRYPLLARFIEESTWAVHDEVRQLHAAQKALVSPFESVLHLAEQPELCRGPLCGSIEGVLLCVIQLGTFIGYYEDSPNEYTFDSANTYLTGLGLGLLASTAVSLSPTLADLPLAGAEVVRVAFRLGVLVADVSQNLQPADATGERDSWAYVIPNVAPKEAEEELAVIHTRENTPEASRIFISAISRTSVTISGPPARLRRLFRMSDFFRDRTFVALPVYGGLCHAKHIYNSQHARSVVQGPSIAALDTRFIARYPILSTGSGEPFPTATTATELFEHVMTEILTQAIEWENVIQGVVERAKLLSVSEVQVQVFRNSHPVHDLLSALETSLREGVEVAIKDLGPWITRTRDEER…
Eurotiomycetes	Aspergillus_fumigatus_08_19_02_30_GCA_040142875.1	SAT-KS-AT-PT-xCP	MATPRGQTVWFGNEFPNDDLKDLFRRLHQHSKDRRFRLLSVFLEESTAILKEEVANLPQQLQELVPHFDTACTLPEVDFRQGPLGAAMESALLTILELGMLIGHYEAEDIEWDLDPSRTILAGLSIGILAGAAVALSSSLADVAKVGAESVRVSFRLGVYVADISTKLEAPQSDGTLQSWAHVVTGMSHEAVQEELSQYNAVTQNPEITKVFVSAADKTSVSVTGPPSRIKAAFQHSPSLRYSKSLPLPVYDGLCHAAHLYSQDDIEIVINSAKSVIPTSRPVRLPLISSQTGKPFAAKTAGELFLEIGTELLTGTIFLDNVTAGILEHVKLQEPTGNYEIVSFRMSQVLNGILTAIETDFPELGRARRDMVSWVHGDYGARRPSSYAASKLAIVGMAC…
Eurotiomycetes	Aspergillus_fumigatus_08_19_02_30_GCA_040142875.1	SAT-KS-AT-PT-xCP	MDQYSNLFAFEDYLGAQARSIPDLPEVDVLSPRVVRVLGGNPGQMQLQGTNTYILGTGAERLLIDSGQGRARWEQLMASLAAEHKFRISTVLLTHWHLDHTGGVPHLFRIFPELRGANAIYKYHPDPSQQAIVDGQVFSVEGATVRAVFTPGHSTDHMCFLLQEEEAIFTGDTVLGHGTTGVEDLEEYMQSLRKIQSLGCRIGYPGHGAVIENMQQKVQQEIDRKQRRERQVLLALQNIQREKRTVGDANGAATQAELIEAIFGRLPADVADRFFAPYMKDILMKMARDKQVGFRFKGGQKHWFANVSQENPVCPSQLALFYFANGLPPDDIQDLFQRLRSQSKTESGWTLRAFVVQATNALREEIRQLPHHLRNPLTPLDNALDLAVVPDWRRGPLAG…
Eurotiomycetes	Aspergillus_fumigatus_08_19_02_30_GCA_040142875.1	SAT-KS-AT-PT-xCP-xCP-Te	MNQIPVFAGLGSDALFSERTLGTAAEDARTPEGQIILRACHSIFLKEVASVTHSRRLPSDINLDDFVEPESLIRPRQCYERNSIIQHVSLYTIQLLRYLRYSKEKPGIVLGVAGFCAGLLPCAAVATSKTVIELLARAQDFFYVALHLGIRVESYRQTMVAKEACSPDLPCSLVVDGIDAHHARELLDDHNRRSPASYVYLSAINSDTCVTLSGRGDHLQQFSQSNALSQCKIRPTKIFSLYHNRRQLEGVQKDVLQDLRGNILLCSTPLHLIAPLFSNIDGKPIDSGQMTTFGEFCEKLLEMMLLEPVDWVAVEDNILAALKQSATAGDASYEILNFGPGYGMSGARHTLPDNLKIVAASIAESRPLPQDASGLLSPDDIAIVGMGVDLPGAPDADAL…
Eurotiomycetes	Aspergillus_fumigatus_08_19_02_30_GCA_040142875.1	SAT-KS-AT-PT-xCP-xCP-Te	MEDLHRLYLFGDQTISCDEGLRNLLQAKNHTIVASFIERCFHALRQEITRLPPSQRTLFPRFTSIADLLAQHRESGTNPALGSALTCIYQLGCFIDYHGDRGHPYPSSDDGLLGSCTVEIVRLTIHLGLCVMRVREMVDSTESSSGSWSILVSEINEADATSLIGNFVKKRGIPPSSQPYISAVGSKGLTISAPPEILDNFIEEGLPKEYKHFKAPGVSGPYHAPHLYNDREIRNILSFCSEDVILRHTPRVPLVSSNTGKLVQVKSMRDLLKVALEEILLRKICWDKVTESCLSIVQATNDKPWRILPIASNATQGLVTALQRMGNCQIEVDTGVGAPQMDPAAPNATGNASRSKIAIIGMSGRFPEADGIEAFWDLLYKGLDVHKKVPPERWDVDAH…
Eurotiomycetes	Aspergillus_fumigatus_47_10_GCA_040142855.1	SAT-KS-AT-DH-xCP-xCP	MASTLPSTVVCGSQTSPPSRDCLQRIQADLKDPKLKELAKAVDELPEFWSHLVEVKPVLSQVNDAPLKKLKDWAKDESVLNIPEGLPNILLAPLTVIIHLVQYLRFAHSLDANDSQEDQHHRILQSTSKGGFQGLCTGFLSAAALACSRTRSDIWCNATVALRLATCVGAYVDLDRLTYDNTDVHTCMIIHWEDNCGKDQVTEVLKGYPGVYISVELDNRSITVTAKQSQVSLLRGDLAARGAKLTRIPIYGRYHSRTHAEILQDLLEICSNDESLRFPIISAPIVPLRNNTTGGLITSAEKLHELALKCMLTEPADWYSTMSETVSSLMLQPVINEHPLILELGHVSCLPRSLTASANIRAFTPLLTLTASPNEPDASRYDYPEHSIAVIGAACKFTG…
Eurotiomycetes	Aspergillus_fumigatus_47_10_GCA_040142855.1	SAT-KS-AT-PT-xCP	MATPRGQTVWFGNEFPNDDLKDLFRRLHQHSKDRRFRLLSVFLEESTAILKEEVANLPQQLQELVPHFDTACTLPEVDFRQGPLGAAMESALLTILELGMLIGHYEAEDIEWDLDPSRTILAGLSIGILAGAAVALSSSLADVAKVGAESVRVSFRLGVYVADISTKLEAPQSDGTLQSWAHVVTGMSHEAVQEELSQYNAVTQNPEITKVFVSAADKTSVSVTGPPSRIKAAFQHSPSLRYSKSLPLPVYDGLCHAAHLYSQDDIEIVINSAKSVIPTSRPVRLPLISSQTGKPFAAKTAGELFLEIGTELLTGTIFLDNVTAGILEHVKLQEPTGNYEIVSFRMSQVLNGILTAIETDFPELGRARRDMVSWVHGDYGARRPSSYAASKLAIVGMAC…
Eurotiomycetes	Aspergillus_fumigatus_47_10_GCA_040142855.1	SAT-KS-AT-PT-xCP	MRPVDFTPSSESPTAEKGMKVVYFGNELPQDGIQGICRRLHTYTKDRRYPLLARFIEESTWAVHDEVRQLHAAQKALVSPFESVLHLAEQPELCRGPLCGSIEGVLLCVIQLGTFIGYYEDSPNEYTFDSANTYLTGLGLGLLASTAVSLSPTLADLPLAGAEVVRVAFRLGVLVADVSQNLQPADATGERDSWAYVIPNVAPKEAEEELAVIHTRENTPEASRIFISAISRTSVTISGPPARLRRLFRMSDFFRDRTFVALPVYGGLCHAKHIYNSQHARSVVQGPSIAALDTRFIARYPILSTGSGEPFPTATTATELFEHVMTEILTQAIEWENVIQGVVERAKLLSLSEVQVQVFRNSHPVHDLLSALETSLREGVEVAIKDLGPWITRTRDEER…
Eurotiomycetes	Aspergillus_fumigatus_47_10_GCA_040142855.1	SAT-KS-AT-PT-xCP	MDQYSNLFAFEDYLGAQARSIPDLPEVDVLSPRVVRVLGGNPGQMQLQGTNTYILGTGAERLLIDSGQGRARWEQLMASLAAEHKFRISTVLLTHWHLDHTGGVPHLFRIFPELRGANAIYKYHPDPSQQAIVDGQVFSVEGATVRAVFTPGHSTDHMCFLLQEEEAIFTGDTVLGHGTTGVEDLEEYMQSLRKIQSLGCRIGYPGHGAVIENMQQKVQQEIDRKQRRERQVLLALQNIQREKRTVGDANGAATQAELIEAIFGRLPADVADRFFAPYMKDILMKMARDKQVGFRFKGGQKHWFANVSQENPVCPSQLALFYFANGLPPDDIQDLFQRLRSQSKTESGWTLRAFVVQATNALREEIRQLPHHLRNPLTPLDNALDLAVVPDWRRGPLAG…
Eurotiomycetes	Aspergillus_fumigatus_47_10_GCA_040142855.1	SAT-KS-AT-PT-xCP-xCP-Te	MEDLHRLYLFGDQTISCDEGLRNLLQAKNHTIVASFIERCFHALRQEITRLPPSQRTLFPRFTSIADLLAQHRESGTNPALGSALTCIYQLGCFIDYHGDRGHPYPSSDDGLLGSCTVEIVRLTIHLGLCVMRVREMVDSTESSSGSWSILVSEINEADATSLIGNFVKKRGIPPSSQPYISAVGSKGLTISAPPEILDNFIEEGLPKEYKHFKAPGVSGPYHAPHLYNDREIRNILSFCSEDVILRHTPRVPLVSSNTGKLVQVKSMRDLLKVALEEILLRKICWDKVTESCLSIVQATNDKPWRILPIASNATQGLVTALQRMGNCQIEVDTGVGAPQMDPAAPNATGNASRSKIAIIGMSGRFPEADGIEAFWDLLYKGLDVHKKVPPERWDVDAH…
Eurotiomycetes	Aspergillus_fumigatus_47_10_GCA_040142855.1	SAT-KS-AT-PT-xCP-xCP-Te	MNQIPVFAGLGSDALFSERTLGTAAEDARTPEGQIILRACHSIFLKEVASVTHSRRLPSDINLDDFVEPESLIRPRQCYERNSIIQHVSLYTIQLLRYLRYSKEKPGIVLGVAGFCAGLLPCAAVATSKTVIELLARAQDFFYVALHLGIRVESYRQTMVAKEACSPDLPCSLVVDGIDAHHARELLDDHNRRSPASYVYLSAINSDTCVTLSGRGDHLQQFSQSNALSQCKIRPTKIFSLYHNRRQLEGVQKDVLQDLRGNILLCSTPLHLIAPLFSNIDGKPIDSGQMTTFGEFCEKLLEMMLLEPVDWVAVEDNILAALKQSATAGDASYEILNFGPGYGMSGARHTLPDNLKIVAASIAESRPLPQDASGLLSPDDIAIVGMGVDLPGAPDADAL…
Eurotiomycetes	Aspergillus_funiculosus_NRRL_4744_GCA_027569145.1	SAT-KS-AT-DH-xCP-MT	MGSLPETVVLFGPQRSDVDDSVCKIRRALREHPGLHFLGDVVDELPSLWPTISDALPGLTQIPGETMLVTLARSIREEDAPTTEIDPLNMLLTPLTVIRHIVEFWELGQGLDHPAFVAEASQRSRVTDVQGFCVGFLAAVPVACCQSLKEFAVLTAAVVRLAVCVGAAVDLDEAMHGASASIAIRWKSPGEYESLQQILARHPEESYISCVIDVDSVTVTVSSDVEQLLTQELMDHGLILRPIALRGRFHHESHADAAESILELCDRDSRFQLPSGSAACLPLKSNTDAQGIAQDMLHTIAVRSILTRQCNWVRTLSPMLGQLQNNKPQRSVMSIGSGQFVPRSIRTRLQHTNHFSQRNRAPAAPLIAITGMAGRYPHADSLEELWQLLELGKCVVQEL…
Eurotiomycetes	Aspergillus_funiculosus_NRRL_4744_GCA_027569145.1	SAT-KS-AT-DH-xCP-xCP-MT	MSPLPAALVFGPQTSLPSADLAVQLRAALLIDPRLYSLRASIENLPSVWPVLLAADPALGRLPSHEALQQLSRWLSDGHFPKVESISELPAVFVTPFTVILQLVQYLCYADPRTGGPAHEDVLKSVKDQGGVQGFCTGLLSAVSVATSGDVESICRQAAAVLRLAVAIGAYIDLDCAESTDSSSVAVKSRQSITQDQLEGYLVHFPDTYVSVVMESSAFTVTTPAASLETVSNKLKSQGLAVKQVDLRGRFHYPGHARAAETLRRLAASNTDFQLPQTSSLLAPVYSNIDGQRVPDGSIHDTLLDAMLVQQCQWYASLAAAFSHIPLGKESIVVQLGLVDCVLSAILRLVGASLQRIWRISQLVGHLSATVDRPADSPYHPSSEPIAIVGMACKFPGAD…
Eurotiomycetes	Aspergillus_funiculosus_NRRL_4744_GCA_027569145.1	SAT-KS-AT-PT-xCP	MSVYTPPSDSQAEDSKMKLLYFSNEFPKDDLQDLFRRLHNHSKDRKHPVLARFIDEATLAVRDEVRQLPSWLRTLMPAFDSVLNLADHPDLRKGPLGGSMDGVLLLVVQIATLIGYYENAPGRFDLSTVPTYLSGLGLGLLASASLALSSSLADIPDTGAEAVRIAFRLGVLVDDVSHNLEPRDTSGSPDPWASVVPGAKLQDVLAELDAIHTREQTPTPSKIFCSAWSETSVTISGPPSRLKRVLRLSEFFRRHKAVNLPVLSGLCHAKHIYNEKHVQQIISTNSMESVDTKYSPSVIILQTSTGRPFTASTAKELFEQLVAELLTQPILWDTVIQGVIDQAYTISATNCEVLVFRNSVPINELRSTLTTKLQGFEASTEELIPWILEKSEKEDPRTS…
Eurotiomycetes	Aspergillus_funiculosus_NRRL_4744_GCA_027569145.1	SAT-KS-AT-PT-xCP-Te	MAPQHFLLFGDQTVELVPSLKRLLELSKASHTVRQFLQSSLDVVQRRLSALNADEKARLGSFDSFEAVLDAYSQHEDTIGVAHTVAICVCRLAELILNVQNDPSLLGAPQSRVIAIGLCTGLLPAAALAGSRNISELISTSVETVAVCFRLALELYRRTRRIEEAPGHWAYTVLGLRASETNAILDDFHLAQNTPNHRRVFIGVQEDSWLTLFGPPPELAQLFSYSSRIEAAPKTRLAAYGAVHASHLPVPDIDEVVGNSAVLDRALTSHVQVLSTSTGEPYTPSTLRELYVDVCREIVQKRLKLTDVLASAVSKLNPSVPVQVTVVGLTNATPIVKRTLEERGLSVELQDKPQAQSPQNNDSRAGSNSIAIVGMAGRFPGSDDLEEFWQSLLQGLDAH…
Eurotiomycetes	Aspergillus_funiculosus_NRRL_4744_GCA_027569145.1	SAT-KS-AT-PT-xCP-xCP-Te	MEGKYHVYLFGDQTTDFEAGLRRLLQAKNHTTVSSFFQKCYHALRQEIAALSPSERSIFPRFTSIVDLLARHCETRGNPALESALTCIYQLGCFINYYGDLGHAYPSSSKSHIIGLCTGLLSCAAVSSASNIGELIAPAVESVIVALRLGLCVLRVRGLVDQNQSSSASWAALVSGINENEGLDLIKKFSAQKTIPPSSRPYISAVCSNTLTISAPPMVLEQFIETALSKEHKVTKASIHGPYHASHLYDDRDVERVLQSCDKEIILNFKPHIPVLSSHTGKPIIASTMGDFLRVALEEILLQQLCWDKVTDSCVSVLKSGGDRTSKILLPISSTATQSLFSALKKANLSNLGVDGGIGDVSADTKGVNDTGRSELSKIAIIGMSGRFPEANSPQDFWN…
Eurotiomycetes	Aspergillus_funiculosus_NRRL_4744_GCA_027569145.1	SAT-KS-AT-PT-xCP-xCP-Te	MASPRHILLFPHEQVDVLGAIHNLSVQSKTRLQLRTFLTAASTVVHRQAAVLDGPERASASIAAFEDLVELAEQHVSQNRRSIVVELVLLTTIQIGQLLVLAEDQPAILSTPDTSSPVGFGAGLIAASVASTATTPDAVVTLGLEAVAIAFRLAFELHHVAGDIEESTDVWARVVAGTDIAGLEKKLEEFNGSLRPLHRAYIGQVLPDSAVLFAPPSTLAALAQTADFPAAITSPTASSRGLLHGAHLPSVDVAKVVGTSPVLDKYTVQRPVYPLAAGTLRELWQLAVAQIAHKPLVVQETLRALATALEGTGSSDIVLTTVGLPWDASGVAKILSQLGLAVQVGEPAPLPKPFGDSIDSIPPDAIAVVGMSGRFPESDSLDEFWRLLATGTTTHQQIP…
Eurotiomycetes	Aspergillus_funiculosus_NRRL_4744_GCA_027569145.1	SAT-KS-AT-PT-xCP-xCP-Te	MSGSLKLYVFGDETGDFAESLQRLCEQRKEFLFLHFLEELNKILRDEVRRQPREVRMQIPEFTDVLDLVKRYRHSGSRNQILETTLTCVCQLATVISFFGNKTSQYFTPSDSAFAGFCTGLLSASSVATSQDTLQLISNALTTVRVAFRIGVKVNGAAQRLSKHGDAAAAQSWTTLIIGAQKEASIAALAEFSESKGIPKANQAYISANSKDVVSISGPPETITSLLQHSEYLQKFRAVSLDIFAPFHAPHLYSDDDVAEVLQPFSSKDEKRKFFIPVMSGAGTRYSPDLDVDTLMVDVVRDILIRPLSLENFMKTVTETTTASPQKNCQVFSVGPSQAINSLASTLRAETSLNVTTEGQLHTEKPNYEPLNGAQKIAIVGMAGRFPNSDDLESFWSTL…
Eurotiomycetes	Aspergillus_funiculosus_NRRL_4744_GCA_027569145.1	SAT-KS-AT-xCP-xCP-MT-Red	MASSSHTVLLFGPQALSFNETSFTELRDAILNEPGNRWVIDAVSELPGSWASFAANFPKLNAIDGGQRLQQLIDWLNTGDITPAAARTLPNVLLSPLVVIAQLTQFTKYLRLKRPDDSPSLGDDDIYASLAQEDTEAVGFCTGLLSALAVATARNKSQFEQTATTAIRLATLVGAFVDAQEISGPYKASRSFATVWNTPHAKEEVAHIINEFPGTYVSVLYDRNRATVTTAASRAIELQQRLSAAGIIAAEVNLSGRFHCDCYNDDIQQILDFCDSDSKLQFPTTASQLVVPVRSNDGNFITEGLLHHFALRGILVEQSRWFETFSAVHDSKLGDKRATVVGFGPERCVPPSILRSVSDQVVYMTTPAEVKGRLLQGITTKPQYLPDYPQGYSDNDIAV…
Eurotiomycetes	Aspergillus_glaucus_CBS_516.65_CBS_516.65_GCA_001890805.1	SAT-KS-AT-DH-xCP-MT	MPATTPNTLILFGPQITRLLPGHLAELRAIINDPNFSFLLDVVKELPSLWPLIRESCDPLRHLPGQEQLQQLENFFETGELPQVEPPNNIILAPLTVLAQVTEYLRLGRTGNTQGFCVGFLAAAVVASAQNETELQQLAAAAVRLAVCIGAAIDLDKVTLDPQDRSFAYSVHWTSMAEKTHFEKALTSFPKAYISCVTDQDRVTVTIPLEQFAAFSLQLSNGGLSAKPVGLCGRYHLLGRENIVQQLKSLCKENPAFQLLSADGLNLQIRSNADTAVVSHGKLHDIILESILSQKCEWFQTVQAALSAQGQEVEIVSVGGLGAVPPSIKRKELRNGDASLQMESTNENLSNSPSLPSGLETPSDLSWTTPSASGAIAVIGMACRYPQADSVEEFWNLIT…
Eurotiomycetes	Aspergillus_glaucus_CBS_516.65_CBS_516.65_GCA_001890805.1	SAT-KS-AT-PT-xCP	MDTPSSSADVVNDHHYRLVYFSNELPSDEQISAHLRRLQALSKDRRYPILKIFLDDATDVLREELRKLPSNLLSLIAPFESIIDFAYQFGLRIGPFGGSTEGVFTCLIQLGTYISYHECPTNDPLTSPDGTLVALGSGLLTAVAVSFASRLSDLVKLGAEAIRIAFRMGLRVDQVSQRLESRRAEGPTESWAYVFSELSEDEVRKELASMNASLNFPTPSQIFLSAVSPGSVTISGPPSRLKTLVRSSELLRYAKWAPLPIFAGFCHTAHVYTRADAEAIVSATKLPTNSPYVIHTPLLSTRDGQPFAAQTPARLFEDVIFELLTGTIRWDTVIATLHDRVALQLVPEVSVKALGMPNALKSFNEAVQAHADPVRVITEDVLAQSLATPLPERAPRDPK…
Eurotiomycetes	Aspergillus_glaucus_CBS_516.65_CBS_516.65_GCA_001890805.1	SAT-KS-AT-PT-xCP-xCP-Te	MEGLRRVYLFGDQTGDFDAGLRRLLHAKNSSLVTAFFQKCFFALRREITKLPPSRRQIFPRFTSIVDLLARYRESGVNPALESALTCIYELGCFINYYGDLGHAYPSGSDSVIVGLCTGLLPSAAVSCSKTVGELIPVAVETVVLALRLGLCVHSVRKLVDRGTSSSSSWSALVSGIGEGEALDKIRGFSGQKAIPPSSQPYISAVSANGVTISAPPSTLDQLIQTSLSKDHKLVRAPIHGPYHATHLYDARDVDRVLDSWPKDTFSSYVPQIPVLSSNTGSAIDAEAIYVLLRASVEEILLRQLCWDKVTESCVSRLKDNASSACTLVPISSSAIQSLHTTLKKAGVTNIDVDSALGDIPNEPNGFSTTGRSEHSNIAIIGYSGRFPEATDPEEFWDL…
Eurotiomycetes	Aspergillus_haitiensis_NRRL_4568_GCA_027569155.1	SAT-KS-AT-PT-xCP	MTLYTPPSDSVSESRQLKFFYFSNEFPHDDLELLIRHIRQHSKDRQHPELARFLTEATLAVREEIRCLSSSLRSLIPSFESILDWSDNVALRKGPLCSSVDGVLLCVVQLSAFIGYFENHDAEFNLDQVQTSLAGLGIGLLSTTAVSLALAIADIPRTGAEAVRAAFRLGIHVSEVSAHLEPTPSGEGPVDSWAYVMPDMLPEEVQKELDMVHEKEGTPSVSRIFVSALSPTSVTISGPPARLKALFRSYDFFRDRKYVSLPVYGGLCHAPHIYRPHHVHTVVRIPSVDCLSERYRPVVPVLSPSTGKPYLATTATELFENVITEIMTQHIEWRKVIEGVVRCLDGFAASELEIYLFRKSLPIHELLLATQEVATSTKDLIPWILEDSTVNRGPIGPMQ…
Eurotiomycetes	Aspergillus_haitiensis_NRRL_4568_GCA_027569155.1	SAT-KS-AT-PT-xCP	MDSLCTRTLFFGNEFPSDDLKDLFRRLHQHGKDRRFRLLSLFLNESTAVLKQEVAKLPRQLQELVPHFDTICTLAEVDFRQGILGAAMESALLTVLELGMFIGHYEAKDAEWDLDTPQTQLAGLSIGLLAGAAVALSSSLADVTRMGAESVRVSFRLGTYVAGMSSKLEARQSDGSLQSWAHVVTEMGQEAVQNELSQFNAATQNPELTKVFVSAADKTSVSVSGPPSRVKAAFQHSPALRYSKSLPLPVYDGLCHAPHLYSRADIEAVIDCAKSVIPVDRAVRLPLLSSQTGKPFGAKTASELFAEISTELLTGTIYLDEVKAGILAHVEGRATEDKFVIDSFRTSLVLQGIQSAIETGFPALSLVRGDLVAWVHEEYGPRRPSSYAASKLAIVGMAC…
Eurotiomycetes	Aspergillus_haitiensis_NRRL_4568_GCA_027569155.1	SAT-KS-AT-PT-xCP-Te	MASHDVLFFGDDIVNPDSALRELHALAKLRPQLNQFLQAAASAFRRHLLGISIVERCLFDNIPDIVEPPGRNVYQATPSPGRSSVLLTVVQVGEFLVYVEDNLHILTTGTPRTSFVGLGVGLLAACTAAAARDTSEVVTIGVEAVLISLNVALELAHRASPIVHGGGAQWESAVVQMPHNRVQSCLDEHNQALAAPNQAYISVIGDTWVAVSGPPSTVETLRRLEPFRANISSPIKITHALHAPYLAHLDKEKIVFSSRILEVGDILQRPCRVGETVAKVASLVKEKGIDDFAVIRFGDFLLGKNVSQLVHNQLKEATRHQPHSSSDEALSFPKGIAAIGISGRFPGADSVDELWDLLQDGKDVHQEIPSTRFDLNEFYDPSGERKNSILTRYGCFLRR…
Eurotiomycetes	Aspergillus_haitiensis_NRRL_4568_GCA_027569155.1	SAT-KS-AT-PT-xCP-xCP-Te	MTVQQLYALTICAYRKPGMSEEEYHQYLSEHHAKIVKTHLVKAGITHNTSETKKMLRQIFGNFPEGNTADYDCFIQILFRDVQDYIQAKNDPYYQNVIFPDHANFADSSRTVFVTGWMEAHILDGKLLYGSPALKFTLLAVTELAQFIRYVGQGSKPYPSPSNTYLVGACTGSFAAAAVSTSQTLAELVPVAVETVIIAFQTALRALVLRSDLASPLAGESKSWSAILGAEEEDAVRLVTSFNTERNFVPISKLYISSVSSTSVTVSGPSTTLAEFISSTSLKHAFLPIELPYHAPHLFLDSEVDELVQCSRKPLLIKYHQRFKILSAVNGEVLDSLDFYALIRRAVSEALRESLRWDVCSSSGAFLAASLTRQSSLKVNVTNIVEEASTPSQNEDNLF…
Eurotiomycetes	Aspergillus_haitiensis_NRRL_4568_GCA_027569155.1	SAT-KS-AT-PT-xCP-xCP-Te	MVASHHLYLFGDQTGDFEAGLRRLLQAHNNAIVSSFFLKCYHALRQEVAALPPAQRALFPRFTSIVDLLARHCESRSNPAIESALTCIYQLGSFINYYGDLGHAYPSSSESYIIGLCTGLLSCSAVSSSKNVGELLPAAVAAVVVALRVGLCVLRVRELVDQHQSASASWSALVSGISEKEGLDMITRFNYEKAIPPSSQPYISAVCANTLTISAPPTVLDQFIETSLSNEHKVTRVPIHGPYHASHLYDSRDVEKIIESCDNEIISSYSPHITVLSSNTGKPIRAKSMKGFIKVALDEILLKQLCWDKVTDSCASIFKSMGSEAKMKLFPVSTTATHSLFTALKRAQIGDLEIDGRIGDVSATEEDINSTGRPELSKIAIIGMSGRFPEAENPQDFWN…
Eurotiomycetes	Aspergillus_haitiensis_NRRL_4568_GCA_027569155.1	SAT-KS-AT-xCP-MT-Red	MTSSPLPPRNGAYTLIFGSQILDFNDASARELRAALLEGEDLRWIADTIEELPVYGRELEKNLPEIKVIRLLEELKEWFQTGKSPNAIFPLPNAVLTPLVVVTHLVQYLTFCKTWDPDADLRDGLQSAVQSASETLGLCTGLLSAVAVSSSENFKELQTYGATAIRLAMAIGAVADIEGDWTSLSVSWTSSALGDQMMELLKSFPEDAASLEEQLKGLRLGVTKVGLRGNFHSPMHRERVEALLRVLDSHPAFRFPDASDMVVPTRSNTTGEYIRSGPLHKMVTESMLTLQSNWHQAFAQLDSVMDDQSLVILFGPERCVPPGLARRLGPRLLQGTANLELGSRKVPNSISQPRPPPPSDEAIAVIGMSCHLPGAPDLDRFWEILCAGKSQHKEVPAER…
Eurotiomycetes	Aspergillus_haitiensis_NRRL_4568_GCA_027569155.1	SAT-KS-AT-xCP-MT-Red	MSDAPGTLQRGAPKARPEILLFGPLALSFDHATFLQLRQSVIENEEHHWAVEAIDSLPYYYKSIILAFPHLNVVQRLDHLENLKEAFHTGQSLTASFPLPNSLLIPLVVIGQLTQYSSFLKHANPELDGQVDPYMVAHENRETVGFCTGLLSAFAVSSSRNKAQFRQYATVAVRLGLLVGLVVDAQNTGSSLGPSKSLTAAWNSMEKFEEAQSLFSDFLEVGIPLFHCLSLVDHRANELKTYISVRYDDDRATITTPASAIAELQKELRSAGLIVAEVGLNGRFHAECHREQLAALIKFCDNHTDFHLPGGSELALPTRSNATGDYIQEEPLHHHALRSILVEPPQWFQTFTKIRDESSMYKETMIYSFGSEKCIPPSLMRGLVDRVIYVSDLESVRKG…
Eurotiomycetes	Aspergillus_haitiensis_NRRL_4568_GCA_027569155.1	SAT-KS-AT-xCP-Red	MQRVDGSRPRARTLLVFGSQSLSFDKRALNKLRNEISHSKHRSWIQSTIAELPTFWTALSNELPETASMLPPTEQLHDLDRLLNQSIDDIPEQLNLPNIKLTPLVVISHLIEYERYLETKQDRSDAASAFLNSQSQEVGSGTKSLGFCTGLLSAFAVASSHNNEDLARYGAVAVRLAMLIGALVDAEETRQESLGSGRSVSYSVAWTSKEQEEKMHEILSRWQPDVYVAVRYDRARATITSSGRAAATVAQELREAGLTAAAMPLQGRFHDPSEARKNDTEKLVTLCDRNTDLQFAATPAMALASDSNNPDGTPIAEGTQLHEIAAHSILVQHCEWYGTFTAAYPMNTTDAPRVVCFGSEKCIPPTLASQVQPIYQSSLGRATQGPQTRQAPHGGPDFS…
Eurotiomycetes	Aspergillus_homomorphus_CBS_101889_CBS_101889_GCA_003184865.1	SAT-KS-AT-PT-xCP	MVTYTPPAEAQDLPKFKALYFSNEFPTDDLSTLLRRLHNHSKHRSHSILARFLNEATRVLRNEVSQLRAELAHLVPAFESVTTLASETKLRKGPLCQSIDGVLLCVLQLGTYIGHCELYPEDQLSGPNSLLTGLGVGILVSTAVSVSTSLEDVVTAGVEVLRIAFRLGVFVGDVSHNLEAVDPESSDSWAYVVYGLTVDEAQKELDDIQAKERTPSASKIFVSAISETSVTVSGPPSRLKALFRNYASFRDRKFAHLPVYGGLCHAAHIYTREDAQAVVPSPSLPSRFKPTVPVLSTSSGQPFLASSAANLFEQVIFEVMTKQIVWDNVIRGVAERVAKSDVHDVNIKVFRNSLPAQQLSSALTSAMIDLNVETDDLLAWVGTDIDDGEYAPGSSMQSK…
Eurotiomycetes	Aspergillus_homomorphus_CBS_101889_CBS_101889_GCA_003184865.1	SAT-KS-AT-PT-xCP	MRPADFTPSSEDSLTAEKGMKVVYFGNELNHDSLPKLCQRLHSLSKDRRHPHLARFIEESTWAVRDEIRQLRPGQKAPIPPFESVLHLAEQPELCKGPLCGSIEGVLLCTIQLATFIGYYEAAPAEYSFEAAHTYLTGLGLGLLVSTAVLLSPTLADLPVAGAAVVRIAFRLGMLVSDVSQNLQPTDVTGDPDSWAYVIPNVAFHEVNEELEMIHMRENTPETSRIFVSAISRSSVTVSGPPARLKRLFRMSDFFRDRTFITLPVYGGLCHAKHIYSLQHVRAVVQVPALAALNKRYISRYPVLSTSRGEPYPTAATATELFEHVIAEVLTQPIEWDNVIRGLVERAKLLPLSEVQVTVIRNSLPVHDLMSALRTANLEGVEVSMQDLEPWATKRVDEE…
Eurotiomycetes	Aspergillus_homomorphus_CBS_101889_CBS_101889_GCA_003184865.1	SAT-KS-AT-PT-xCP-Te	MTRSALVYIFGDQSENYIAGLRCLLQSPQSDQTLRHFLTQSYEGIIREISQQSYCPEYLAVHTSSLRDLLSNEAERYVPLQHALATLYHFAAFIHRCHQSEGVYVLRDHPATYLIGLCTGSLAAATISCLDSLVNLLPVAVDVVRLSFRVGAVAANIARAVAGEGKTRPLTWALGCAGLLPETADAVIKTLVRDHTLPDTARPYISSLWPGGITVSGPPEILSLWRSHPELSAIRTTWLPVYAPYHAAHLYSEQYVDHILQTFPSVKIKTQQVIPTLFGTTVQSPATSSGADLRTVLRDALHGIYCQPMELARVPQELQSILAMSDITSVKVIPIASSQAQRIIPSLQGVDVHIQSDLLGNSNDSPSGMSLGASAQGPRFALVGMAGRFPNAEDTSAFW…
Eurotiomycetes	Aspergillus_homomorphus_CBS_101889_CBS_101889_GCA_003184865.1	SAT-KS-AT-PT-xCP-xCP-Red	MTNHVQLYVFGDQTFQLQPHLKHLLRGRSNPILADFLDKAYQAVRAELYRLPTTTREDLPRFSSLEDLVLWDQNGPRCVPLDMALTCLYQLGTFIDQTAPEDFNASTSRVLGLCTGALAAAAVSCSRSTSELVPLAVKAVIAAFHTGLVVADVTQRIGPSCEADQSWSMIVPGLHAAEGVEEFRRNSTLPLTSQPYVSAYAPNGITVSGTPSVLAQLRASEPFTGLRFKGIPIYGPYHAPHLYAPADIHSIINELPSDSMGVTAQLPSLGGSRDPSGDVTTFSARLEEAIEQILLHPIRWARILDELQASLQHSAPDSFRVVSIGSTADQLIYTALKQTPLRSLVPSTQTPSSTATLALSPPPSASSGRPKLAIIAMSGRYPNAQDNEAFWSLLHQGLD…
Eurotiomycetes	Aspergillus_homomorphus_CBS_101889_CBS_101889_GCA_003184865.1	SAT-KS-AT-PT-xCP-xCP-Te	MSANSILRRSEQMEGPYHVYLFGDQTSDFEAGLRRLIQAKNNTIVQSFFQQAFHALRQEISKLPPAQRKIFPRCTSLIDLLARYCESGPSPVLESAFTCIYQLGSFLNYYGDLGNAYPSDGCQLVGLCTGLLSCAAISASRNVGELLPAAVETVVVALRLGLCVLRVRELVDSEASSSSWSVLVSGLNEESASSLIEDYSTRLAIPPSSKPYISAVSSNGVTISAPPSVLDTFVETGLAGKYKPTRVPIHGPYHAPHLYDSRDVERILESSPQDNIAHYTRHIQMLSSETGTPIEASKIKEVLKVAIEEILLRRLCWDKVTESCISIIESSQSQSCRLMPISTSATQSLHTALKKAGVANLSLDTGIGEIPSTADRPNSTGKTECSKIAIIGMSGRFPD…
Eurotiomycetes	Aspergillus_homomorphus_CBS_101889_CBS_101889_GCA_003184865.1	SAT-KS-AT-xCP-MT-Red	MALGSASNTHSAARSRLLLFGPQALGFTKQSFQSLLRSLSDSPLDRRWVLDLVAELRAHWPTLAKQISTLQWVRGEKLLAELEGWFMTSSFPETNYDLPNILLTPLVVLSQLGQCWQYFSVRNLGNDMPLSGCATLGFCTGILSAFAVSSSKSLQDLPHYAAVAVRLAMLIGALVDAQEASDTVYGPAKSFAIAWTSTEQGTILDRIIDQFPEAYISVLYDTQRATVTISQHTASLLVQQLHAAGMVASEVGLQGRFHCRQYEKDLETVLRFCDSEPRFQFPDASQLALPSYTNTDGQPLVTGRLHHLALRAVLVEQCNWYKTFTAVQSSVLQSDSDVAVSFGPSRSVPPSLVRQLGARLVQAPMIEERPEAPQFSASVLDPKIDRSATSIRNAEDDDI…
Eurotiomycetes	Aspergillus_hortae_MCA7_GCA_032158215.1	A-xCP-Red-KS-AT-DH-xCP-xCP-MT	MGFVRPTLNLEPSEGEEIRTLPELIEFHSLHNASYEFCQQAWKEPDGHTFLHVDYQQLHMAISRCQAWLRSNLDLQTPLLLGDGTVAKAAPVALLMESHIGLAIYTLALMGLGVPAVLLSARLSSVAVAHLLRETGVEKILVSPRLQSITREAAIDVAVFDPTAYQELLAAPDDDLSSSGPVVALPLHYVSETDRNVLILHSSGTTGLPKPIYCSHRHLLGFALCHEFTDEIAPGLLVSTSPFFHKHQGFGLVPMCLSLGVGKPFAIPPTTTILTGLSVIELLEDCKAKALLTVPSILEEIALLPSDRGLNVLRKLDFVAFGGGLPKESIAQRLVSTGARLINHYGATETGPMTPFFQPEPDHDWHFFQLRVDTLGPLQVRLEPVENEQPPQENAFKMS…
Eurotiomycetes	Aspergillus_hortae_MCA7_GCA_032158215.1	SAT-KS-AT-DH-xCP-MT-Red	MNTITSPSTPKVLIFGSQALGFNSQTADHLRTALLQTPECAWLLDSLAELRTYWADAVVAIPALQDFPGAECLEDLSTWLRTGAFTNSTFPLPNTILTPLVVVYHLAQYLQFLDVTRQTEDRLSASFIKTTESMGLCTGLLTATAVASSATRADLQLYGAVAVRLAMLVGLIVDAQNQASGGNQSFTIAWSSAALGETAREIIERDPDAYISVTVDEMKATVTTSARAAPALQKELKTVGIIMADISLAGRFHTPDHEAVLQALDAFCDTHPEFQFPNADQLVFPTRSNTDNAALIQSGALHRTTTRSMLTEQCQWFQAFKQIDASTLASGNAVAVIFGTENGAPGWLSRKLGPRLVMLDQLSPLELPVSRASLLDPQAPIPYRKKLSSQGVAVVGMSA…
Eurotiomycetes	Aspergillus_hortae_MCA7_GCA_032158215.1	SAT-KS-AT-DH-xCP-xCP-MT	MPPSLLLCGSQAIQWSEDYLSSLRETLLADSVLQPLVNAIRDLPQLWATLLEADTALHKIPGKQTLDRFTRWLDGERLLEKDLLSGSNMIMSPLTVIMQLVEYISHLHQNNLTHLQILDGAKHRGIQGFCTGFLTAITLSISRDENDVAELGAVALRLAMCIGAYVDLDQCNTSGFACLAVRWPAAADEGKVKDILETCDGAYISVRSDVTSATLTVPQATKSIITEKLSNMGVHVKDIPLSGRFHSQVNCESFAKLVSLCKSTTALQFPAHCRPLVPLRSNADGELLSGNEALHVAAMNSLLLDVSDWHKTVSKAMDSLGQATAEPEVSVLGLGDCVPRTIRQSRALHVSHIKTGSTQSHDDPYQYPGDSIAIVGMGCRFPGADSLEEYWKVIESATS…
Eurotiomycetes	Aspergillus_hortae_MCA7_GCA_032158215.1	SAT-KS-AT-PT-xCP	MNDKPAFKLFYFTNEKPSGNPKEVFRRLRSHSRTKDHPLLHAFITEATAIVREELRQAPDSLRSQLPPFENILDLAELLDWQQGAFLAIFETVFLCLLQLSLVIGYFEKFPNEFALSKSTSCFTGIGSGLLAAAAVAASPTLSDLPKLGREMIRVALRFGMVTNEVTQSIEPREPGRPSESTAVMLIGVHEETVQKELDAFNKSTHNPRPGHIYTSVIGEGSVTISGPPSKLLADRAMGDAAPLLSPGDGSPFPSNTPRQLFHSAVSEILTGAVCWNKALESALDIIQNAWTTGPHLFAINPCRAVTQMVNAGATRQPKCDFQTHIMGHWVFGDSVSPAILRREDSPIAIVGMSCRFPGGADDPERFWELLEEGRDVHKKVPADRFDVDLHCDPTGKRK…
Eurotiomycetes	Aspergillus_hortae_MCA7_GCA_032158215.1	SAT-KS-AT-PT-xCP	MDFTPSTGTPGEFRRMKLTYFTNEFPSDDLPGLARQLHLHSKDRRHHILARFLQDATLAIREEVAQLPPALKDLLPPFESVLTFVEYPEMRRGPLCGSIDGVLLSTVELATFIGYFEEFPETYDLESAHTYLAGLGIGLLSAAAVSLSRTLADIAYVGSEVVRMAFRLGVLVDNVSEQLQPRELASHGTPDSWAYVLPNVTREAVQQELDVIHSGEGIPETGKIFVSAFSQSSVTVSGPPSRLKDLFRTSSFFRDRRFFSLPVFGGLCHAKHIYTETHVQHVVRIKPMDMLSARVLPRIPIFSPSSGSPFPAATATELFEGIISEILTQVIQWDNVIQGALDQINILSPSEFQVLVFRISLPIHDLMAAVNTELKGFQATTKEIMPWVSHTAKDRIPRE…
Eurotiomycetes	Aspergillus_hortae_MCA7_GCA_032158215.1	SAT-KS-AT-PT-xCP-xCP-Red	MPNTTMELFIFGDQTLDVQLYLRGLAQHRHNPVLEDFFNKAYQVLRTEIDQLPPNVKVTLPRFTCIDDVIFRPPGSKSCIALDMAVSTLYQLGVFISQHINHLGESRVTCVLGLCTGALAAAAVSCSRNVVDLVPMAVDAVRAAFRTGAHVLDIAHRIESPDASDQSWLLYVPGVEAAETALKAFREQTLLPGIRQPYITAYTLNSVMVSGPPSSLEQLKRHAPFRELNPQSVSINGPYHAPHLYSEENIDNIVRDLACQGVHGRSCRVPVIAADGNPVPDADFGTILKAAVAQILRHQINWNGILKELLTRHEIAGSPTLTVTTIGTKTDHFVYNVLKQSPLREYLSSKPAQSQQSISDERAPDPANGRQKLAIVGMAGRFPGAEGIEEFWALLEQGL…
Eurotiomycetes	Aspergillus_hortae_MCA7_GCA_032158215.1	SAT-KS-AT-PT-xCP-xCP-Te	MAGSLKLYVFGDEAGDFAGPLQRLCEQRKEVLFLHFLDELNKVLRDEVRRQPRDVRVQIPEFTDVLDLVRHYRDSGSRNQILETTLTCVCQLAAVISFFGNKTSQSFASSDSVFAGFCTGLLSASAVATSQDTLELISNALTTVRVAFRIAVKVHGAAQRLSKHGDAAVAQSWTTLVIGAQKEASIAALAEFNESKGIPHANQAYISANSKDVVSISGPPETVASLLEHSEYLQKFRTVSLDIFAPFHAPHLYSDEDVAEVLQPFSGKNEKRKLFIPVISGLGTRYSPDMDVETLMVDVVRDILIRQLLFENVMKTVTETTTASSHKNCQIFSVGPSQAINSLASTLRADTSLNVTTEGPIHTRSPDYEPLNGAQKIAIVGMAGRFPNSDDLESFWSTL…
Eurotiomycetes	Aspergillus_hortae_MCA7_GCA_032158215.1	SAT-KS-AT-xCP-MT-Red	MTHTTGPRKASGESTIFLFGPHVGTFTKQSMNKLVHPLSQSPQRDWILDTIAELPEYWDALAAKMPDVARDIDGTRSLAELDSWLRHGSANLGEDDSNLPSIIVGPLVVFIQLTQYWRHLELTRAGTQATDLQADLVAMHNNQTGDKVEILGFCAGLLAALAVASSNNRQEFQKYGAVAVRLAMLIGALIDAQEVWDKASGKGSSSSYAVAWRGPKQEEDMTRIIDDLAANAYIAVRYDQTRATVTASETIAPLLLKRFRAAGITVAEVGIKGQIHSPNPDRRAHTNALVDLCNSLPGLQYAEAERLALQTYDNQGDGKPLLPDRGSLTEMVLRSILVQQCHWYDTFSSVTERHQDPYVVTFGLERCVPPTLMRSLGGRQVFFEDLPKDPSHPSSWMPN…
Eurotiomycetes	Aspergillus_hortae_MCA7_GCA_032158215.1	SAT-KS-AT-xCP-MT-Red	MIESTSHPVLRPKAFVFGPQDLSFDTGSFKKLHSQLQDHQWAHDALVDLRKYWDSFSVGDPKLQHANAGGLLENLKAWISNGAVPKDALPLPNVLLSPLVVIGQLVEYLAFLKAAFPSLGKNDDMPSSMFEGIETLGLCTGTLSAFAVASSSSIEEIHQHGAVAVRLAMLAGAIVDAEEASSGPEGESAYVSVVVDERRATVTVSKKTAADVIERLKQVGAHVTSIALSGRFHWQQHQDTASRLIQFCALDPSLQLPDATKMLLQGRSAANGQFITTGKLHELAIRAILLEQAQWYRTCRIAYSSNFIMDDATVICFGPERAMPPTLARKLGSRLIYISEIDISSSPLPRQLLGGTQSVDLADLPDERIAVIGMACQLPGAGDTEGFWQILKQGQSQHR…
Eurotiomycetes	Aspergillus_hortae_MCA7_GCA_032158215.1	SAT-KS-AT-xCP-MT-Red	MAVANHEEAEATTVLLFGPQALSFTEESFQRIRVALNDTENAWMRQVVEELPECTSRVAKQFPKLQATPAAKLQDSLRDWLRIDEGVAPAASKSLPNALLTPLVVLDHLAQYSQYVQLAHVETGLGTDRYGPQSRPTRNLGFCTGLLSALAVSSASNKAEFRKYAAVAVRLAAVIGALVDAEDAIGHHGESKTFSAAYHSSKQESELQSILQDFPEAYISVNYDEGRATITTSNRTAQAFQQRLREAGITAQAIGLRGRFHYQGYQQDLARLIEICDATPDLRLPDVTDAVIPIHSLSGGGLITEGRLHHIALREILVEQSQWGKTFDAMSRSSLASTQSLLVSFGFEKCVPPSAMLRVGGQVVYMTDQRHAGLRLSAVKTPSEMVSEDEIAVIGMAIK…
Eurotiomycetes	Aspergillus_hortae_MCA8_GCA_032158085.1	A-xCP-Red-KS-AT-DH-xCP-xCP-MT	MGFVRPTLNLEPSEGEEIRTLPELIEFHSLHNASYEFCQQAWKEPDGHTFLHVDYQQLHMAISRCQAWLRSNLDLQTPLLLGDGTVAKAAPVALLMESHIGLAIYTLALMGLGVPAVLLSARLSSVAVAHLLRETGVEKILVSPRLQSITREAAIDVAVFDPTAYQELLAAPDDDLSSSGPVVALPLHYVSETDRNVLILHSSGTTGLPKPIYCSHRHLLGFALCHEFTDEIAPGLLVSTSPFFHKHQGFGLVPMCLSLGVGKPFAIPPTTTILTGLSVIELLEDCKAKALLTVPSILEEIALLPSDRGLNVLRKLDFVAFGGGLPKESIAQRLVSTGARLINHYGATETGPMTPFFQPEPDHDWHFFQLRVDTLGPLQVRLEPVENEQPPQENAFKMS…
Eurotiomycetes	Aspergillus_hortae_MCA8_GCA_032158085.1	SAT-KS-AT-DH-xCP-MT-Red	MNTITSPSTPKVLIFGSQALGFNSQTADHLRTALLQTPECAWLLDSLAELRTYWADAVVAIPALQDFPGAECLEDLSTWLRTGAFTNSTFPLPNTILTPLVVVYHLAQYLQFLDVTRQTEDRLSASFIKTTESMGLCTGLLTATAVASSATRADLQLYGAVAVRLAMLVGLIVDAQNQASGGNQSFTIAWSSAALGETAREIIERDPDAYISVTVDEMKATVTTSARAAPALQKELKTVGIIMADISLAGRFHTPDHEAVLQALDAFCDTHPEFQFPNADQLVFPTRSNTDNAALIQSGALHRTTTRSMLTEQCQWFQAFKQIDASTLASGNAVAVIFGTENGAPGWLSRKLGPRLVMLDQLSPLQLPVSRASLLDPQAPIPYRKKLSSQGVAVVGMSA…
Eurotiomycetes	Aspergillus_hortae_MCA8_GCA_032158085.1	SAT-KS-AT-DH-xCP-xCP-MT	MPPSLLLCGSQAIQWSEDYLSSLRETLLADSVLQPLVNAIRDLPQLWATLLEADTALHKIPGKQTLDRFTRWLDGERLLEKDLLSGSNMIMSPLTVIMQLVEYISHLYQNNLTHLQILDGAKHRGIQGFCTGFLTAITLSISRDENDVAELGAVALRLAMCIGAYVDLDQCNTSGFACLAVRWPAAADEGKVKDILETCDGAYISVRSDVTSATLTVPQATKSIITEKLSNMGVHVKDIPLSGRFHSQVNCESFAKLVSLCKSKTALQFPAHCRPLVPLRSNADGELLSGNEALHVEAMNSLLLDVSDWHKTVSKAMDSLGQTTAEPEVSVLGLGDCVPRTIRQSRALHVSHIKTGSTQSHDDPYQYPGDSIAIVGMGCRFPGADSLEEYWKVIESATS…
Eurotiomycetes	Aspergillus_hortae_MCA8_GCA_032158085.1	SAT-KS-AT-PT-xCP	MNDKPAFKLFYFTNEKPSGNPKEVFRRLRSHSRTKDHPLLHAFITEATAIVREELRQAPDSLRSQLPPFENILDLAELLDWQQGAFLAIFETVFLCLLQLSLVIGYFEKFPNEFALSKSTSCFTGIGSGLLAAAAVAASPTLSDLPKLGREMIRVALRFGMVTNEVTQSIEPREPGRPSESTAVMLIGVHEETVQKELDAFNKSTHNPRPGHIYTSVIGEGSVTISGPPSKLLADRAMGDAAPLLSPGDGSPFPSNTPRQLFHSAVSEILTGAVCWNKALESALDIIQNAWTTGPHLFAINPCRAVTQMVNAGATRQPKCDFQTHIMGHWVFGDSVSPAILRREDSPIAIVGMSCRFPGGADDPERFWELLEEGRDVHKKVPADRFDVDLHCDPTGKRK…
Eurotiomycetes	Aspergillus_hortae_MCA8_GCA_032158085.1	SAT-KS-AT-PT-xCP	MDFTPSTGTPGEFRRMKLTYFTNEFPSDDLPGLARQLHLHSKDRRHHILARFLQDATLAIREEVAQLPPALKDLLPPFESVLTFVEYPEMRRGPLCGSIDGVLLSTVELATFIGYFEEFPETYDLESAHTYLAGLGIGLLSAAAVSLSRTLADIAYVGSEVVRMAFRLGVLVDTVSEQLQPRELASHGTPDSWAYVLPNVTREAVQQELDVIYSGEGIPETGKIFISAFSQSSVTVSGPPSRLKDLFRTSDFFRDRRFFSLPVFGGLCHAKHIYTETHVQHVVRTKPMDMLSARVLPRIPIFSPSSGSPFPAATATELFEGIISEILTQVIQWDNVIQGALDQINILSPSEFQVLVFRISLPIHDLMAAVNTELKGFQATTKEIMPWVSHTAKDRIPRE…
Eurotiomycetes	Aspergillus_hortae_MCA8_GCA_032158085.1	SAT-KS-AT-PT-xCP-xCP-Red	MPNTTMELFIFGDQTLDVQLYLRGLAQHRHNPVLEDFFNKAYQVLRTEIDQLPPNVKVTLPRFTCIDDVIFRPPGSKSCIALDMAVSTLYQLGVFISQHINHLGESRVTCVLGLCTGALAAAAVSCSRNVVDLVPMAVDAVRAAFRTGAHVLDIAHRIESPDASDQSWLLYVPGVEAAETALKAFREQTLLPGIRQPYITAYTLNSVMVSGPPSSLEQLKRHAPFRELNPQSVSINGPYHAPHLYSEENIDNIVRDLACQGVHGRSCRVPVIAADGNPVPDADFGTILKAAVAQILRHQINWNGILKELLTRHEIAGSPTLTVTTIGTKTDHFVYNVLKQSPLREYLSSKPAQSQQSISDERAPDPANGRQKLAIVGMAGRFPGAEGIEEFWALLEQGL…
Eurotiomycetes	Aspergillus_hortae_MCA8_GCA_032158085.1	SAT-KS-AT-PT-xCP-xCP-Te	MAGSLKLYVFGDEAGDFAGPLQRLCEQRKEVLFLHFLDELNKVLRDEVRRQPRDVRVQIPEFTDVLDLVRHYRDSGSRNQILETTLTCVCQLAAVISFFGNKTSQSFASSDSVFAGFCTGLLSASAVATSQDTLELISNALTTVRVAFRIAVKVHGAAQRLSKHGDAAVAQSWTTLVIGAQKEASIAALAEFNESKGIPHANQAYISANSKDVVSISGPPETVASLLEHSEYLQKFRTVSLDIFAPFHAPHLYSDEDVAEVLQPFSGKNEKRKLFIPVISGLGTRYSPDMDVETLMVDVVRDILIRQLLFENVMKTVTETTTASSHKNCQIFSVGPSQAINSLASTLRADTSLNVTTEGPIHTRSPDYEPLNGAQKIAIVGMAGRFPNSDDLESFWSTL…
Eurotiomycetes	Aspergillus_hortae_MCA8_GCA_032158085.1	SAT-KS-AT-xCP-MT-Red	MTHTTGPRKASGESTIFLFGPHVGTFTKQSMNKLVHPLSQSPQRDWILDTIAELPEYWDALAAKMPDVARDIDGTRSLAELDSWLRHGSANLGEDDSNLPSIIVGPLVVFIQLTQYWRHLELTRAGTQATDLQADLVAMHNNQTGDKVEILGFCAGLLAALAVASSNNRQEFQKYGAVAVRLAMLIGALIDAQEVWDKASGKGSSSSYAVAWRGPKQEEDMTRIIDDLAANAYIAVRYDQTRATVTASETIAPLLLKRFRAAGITVAEVGIKGQIHSPNPDRRAHTNALVDLCNSLPGLQYADAERLALQTYDNQGDGKPLLPDRGSLTEMVLRSILVQQCHWYDTFSSVTERHQDPYVVTFGLERCVPPTLMRSLGGRQVFFEDLPKDPSHPSSWMPN…
Eurotiomycetes	Aspergillus_hortae_MCA8_GCA_032158085.1	SAT-KS-AT-xCP-MT-Red	MIESTSHPVLRPKAFVFGPQDLSFDTGSFKKLHSQLQDHQWAHDALVDLRKYWDSFSVGDPKLQHANAGGLLENLKAWISNGAVPKDALPLPNVLLSPLVVIGQLVEYLAFLKAAFPSLGKNDDMPSSMFEGIETLGLCTGTLSAFAVASSSSIEEIHQHGAVAVRLAMLAGAIVDAEEASSGPEGESAYVSVVVDERRATVTVSKKTAADVIERLKQVGAHVTSIALSGRFHWQQHQDTASRLIQFCALDPSLQLPDATKMLLQGRSAANGQFITTGKLHELAIRAILLEQAQWYRTCRIAYSSNFIMDDATVICFGPERAMPPTLARKLGSRLIYISEIDISSSPLPRQLLGGTQSVDLADLPDERIAVIGMACQLPGAGDTEGFWQILKQGQSQHR…
Eurotiomycetes	Aspergillus_hortae_MCA8_GCA_032158085.1	SAT-KS-AT-xCP-MT-Red	MAVANHEEAEATTVLLFGPQALSFTEESFQRIRGALNDTENAWMRQVVEELPECTSRVAKQFPKLQATPAAKLQDSLRDWLRIDEGVAPAASKSLPNALLTPLVVLDHLAQYSQYVQLAHVETGLGTDRYGPQSRPTRNLGFCTGLLSALAVSSASNKAEFRKYAAVAVRLAAVIGALVDAEDAIGHHGESKTFSAAYHSSKQESELQSILQDFPEAYISVNYDEGRATITTSNRTAQAFQQRLREAGITAQAIGLRGRFHYQGYQQDLARLIEICDATPDLRLPDVTDAVIPIHSLSGGGLITEGRLHHIALREILVEQSQWGKTFDAMSRSSLASTQSLLVSFGFEKCVPPSAMLRVGGQVVYMTDQRHAGLRLSAVKTPSEMVSEDEIAVIGMAIK…
Eurotiomycetes	Aspergillus_ibericus_CBS_121593_CBS_121593_GCA_003184845.1	ER-KS-AT-DH-MT-KR-xCP-C-A-xCP-Red	MFRRSGLRGGVASSDGSDDGADSEISLESLMLVRVGTDEGLTRAAPGKGPASIFVGADPAPVGAQGRSWEPSGRWGQSPSPDQVFTGSAAASDPLRLSNPFLLPTETTSIDTMPAINPSQRQTAVVAAGLGAYAIAHDHPIPSISPDQIIIRTAAVAINPVDVNTVDNFAYTDTAAGFDLAGIVIAIGSAVDLAVQLREGDRVCAAVQGMNPLRPTDGAFAQYVAADADLVMKVPSDMPLEEAASLPVGVGTIGLALRSLGLDTAGQKPAVVLVYGASSASGTLALQMLRHAGHHAIATCSPANFNLVKEKGAEAVFDYRSPTCVADIRGHTRNSLRYVLDCISETSSMEFCYATIGRAGGLYTSLAVCSSRVKATRPTVKADWVFHPALFGREVAWPN…
Eurotiomycetes	Aspergillus_ibericus_CBS_121593_CBS_121593_GCA_003184845.1	SAT-KS-AT-DH-xCP-xCP-MT	MSFKAPSMLVFGPQSSTLSPECLSQLRTVLGPQSTPRLQPLRAAVESLSTVWPVLAASDRSLATLPGHEYIQQLRGLLSADLDTTVVRVSELPSTVVTPLTVLLHLTQYLLYVESGSTHGVTSHAQVLDRVRQQGGVQGFCTGLLSAVAVAGSRDEHEFIRWASTALRLAIAIGACVDADAQGHSQEASCIVVKWSTEEGKAQLLESLAQTVGAYISVYPDGNAATVTVPTEAVATLTQTLQAHKLVAIPLDMRGRFHTTEHESIAGQLKQLCATTPELQLPRASELLVSVLGNHGQVLPSDASLHDLLIDAILVQTCNWHNTVSTAAANLTADSDPSHIIQFGTIDCIPPSVLRTHPHASVYRMPKSLLDISGTADPSIAAQPPPAANAVAIVGMAGR…
Eurotiomycetes	Aspergillus_ibericus_CBS_121593_CBS_121593_GCA_003184845.1	SAT-KS-AT-PT-xCP-xCP-Te	MEGPSRVYLFGDQTSDIEAGLRRLLQAKNSTIVQSFFQQCFHALRQEITKLPPSQRKLFPRFTSIVDLLARHRQSGPSPVLESALTCIYQLGCFIHFYGDLGHTYPTPTNSQLVGLCTGLLSCTAVSCSKNVGELVPAAVESVVVALRLGICVLRVRELVDSDDSKSTCWSALISGISEAGATALIEEYSTKKATPPSSKPYISAVSSNGVTVSAPPAVLDEFIEASASNNYKPVKAPIHGPYHAPHLYDDKDIGRILQPLTSDTLSGYAPVIPVISSNTGQPVKAKSISDLFKVALEEILLRRLCWDKVTDACSSLCKSGPNQSCKLFPISSSATQSLFTVLKKAGVNVSLETGVGDVSTNPDTRNLTGKTECSKIAIIGMSGRFPDADGTESFWELL…
Eurotiomycetes	Aspergillus_ibericus_CBS_121593_CBS_121593_GCA_003184845.1	SAT-KS-AT-PT-xCP-xCP-Te	MDPYLHRQRSSEHIGQDSCKHHRSIDTCLRDLQLRMLEDLRIHTVSEFGSRPMSPRRPSSYVGCKNGSIQRMNMVLRTTLQDSSAPTETSVIDMEAPAEVFIFGDQTVAFEPTLHSLLHIKDNAVLTDFFDRVGFQLRRHVGKLPSHQQEWFPFFTTLIDLFAQHENCVAAPALKFPLLCATQLGQFIRHFGQGARAYPAPESTYLVGACTGAFAAAAIASAQTLAELLPAAVEAVIVAFRTALRSMILRNDLDPSVDGRQRAWSAIVGTVEEEARSAIDKFNVAQSLPPVARLYISSISRTSVSVSGPPFLLNEFVSSSPWKCSFLPIELPYHAPHLFRKDDAEAILGDFHDPCLREYTQRTRVISATSAEVIASSDLRSLFCRAVQEALCDPLQWDL…
Eurotiomycetes	Aspergillus_japonicus_CBS_114.51_CBS_114.51_GCA_003184785.1	SAT-KS-AT-PT-xCP	MVTYTPPAEAQDLPTRLKTLYFSNEFPTDDLSTLLRRLHNHSKHGSHPILARFLNEATKALRNEVSQLRAELAHLVPAFESVTTLAGETRLRKGPLAQSIDGVLLCVLQLGMYIGHCELYPEDHATGPNSLLTGLGVGILVSTAVAVSTSLDDTVTAGVEVLRMAFRLGVFVGDVSHNLEAVDADSSESWAYVVHGMTVNEAQTELDNIQAKERTPSASKIFVSAISESSVTVSGPPSRLQALFRNYASFRDRKFAHLPVYGGLCHAAHIYTREDAQAVVRSPSLPARYRPVIPVMSTSSGQPFGASSAQQLFEQVIFEVMTKQIVWDNVIRGVAERVAKTDVHAVNIKVFRHSLPAQQLSSALTSDMTDLAVDTDDLLTWVGSDVEHGEYLPGSSMQS…
Eurotiomycetes	Aspergillus_japonicus_CBS_114.51_CBS_114.51_GCA_003184785.1	SAT-KS-AT-PT-xCP-xCP-Te	MEGPYRVYLFGDQTSDFEAGLRRLIQAKNNIIVQSFFQQTFYALRQEISKLPPAQRKLFPRCTSLIDLLARYRESGPSPVLESAFTCIYQLGSFINYYGDLGNAYPSEDCQLVGLCTGLLSCAAVSASKNVGELLPAAVEAVVVALRLGLCVLRVRELVDSEATSSSWSVLVSGLSEENASTLIEEHSIKTAIPPSSRPYISAVSSNGVTISAPPLVLDAFIENGLAGNYKHTRVLIHGPYHAPHLYDSRDVDRILESFPEERLGHYTTHTPVLSSNTGTPVEASKIKEVLQVAIEEILLRRLCWDKVTESCISIVESANRQSCQLIPISTSATQSLHTAFKKAGVVNISLETGIGDVSTSADKPNLSGKTECSKIAIIGMSGRFPDSESPEAFWEILQ…
Eurotiomycetes	Aspergillus_japonicus_CBS_114.51_CBS_114.51_GCA_003184785.1	SAT-KS-AT-PT-xCP-xCP-Te	MEPRSRDILVVGDQSVDPTPFLVHALVKKPTPLLQAFLRDVQPVLRRELEGLPHATRSLIPAFASLHELVEQYQRQGVHLASLDSALTCLAQFTHFIGFCEENPRAYLQPGTLIIGTCTGLLAASVIASADSLVALVPLAVETVRVAFRLGATAARKAESLEASQTPWTSLVTGIDSTTVSAAVEEFYQTQGLRSSHRVYVSSVATNSVAVSGPPSLRTRLFEVSSALRGTHHRTLPIHAPYHAPHLFTDESDILDTASLDILNRYHQIHTVCGFDTSSTRSTSALFIECIHRILQECMDWNKLVATSLNFLAPLNAPSYRILSLGPTPLGNALASALKHEQPAGLKLTLEDHASWLAANSVPAYLSSSPAGCNIAIIGMAGRFPDAADHEAFWELLAQ…
Eurotiomycetes	Aspergillus_latus_na_GCA_041682755.1	A-MT-xCP-KS-AT-xCP	MDTTTVHGSNAMTAQLNAPDDPTTLGHCVHKLFEHAADRYADKTALSCTTKELSYRDLNARANRLALLLARRGIARGDLVVVALDRSLNLVAALLAVLKTGAAYVPLDPSFPLERIRHMMEDAQPKLIVTCDTIRDALSSWKELFVNIDVVHDTSNTDVGNLKADVQTDDLAYVIYTSGSTGKPKGVEVSHGAVSNLLLSMRQDPGCGDSDRLLAVTTVSFDIAVLELFLPLICGATTVIAQEHEVADAGALLGLIEYHRVGIMQGTPATWQILLDSGWCGTPRLDKILCGGEALSRRLADRLLCCADAVWNMYGPTEATVWASIWRVRYGDDIIVGSPVANTQLYVLDTDLSPVPPGSAGELYIGGAGVARGYHNNPKLTRSQFLQTPFRPGTIYRTG…
Eurotiomycetes	Aspergillus_latus_na_GCA_041682755.1	SAT-KS-AT-DH-xCP-MT	MILGTECPEGSIRLLFGPQYTDWGDPVARIRDALEKYPSGLQFFFEILDELPSLWAIMTDAWPALDRIPGERGLTALSQIINNEISASHMNERSNIILTPLTVMAHLAEFWGLQDVAAHPAFPPESSAKYPPTAVPRIIDTQGFCVGILAAIVVACSRDSHEFRMVASSAIRLAVCIGALVDLDETAFGNATSMAVRWESQDGYDRLQKVLVQDPTVKKIYISCHTDVNTITITLPQDTFPWVKQQVSGFRLWSKQIPLRGRFHYNGAHAEGVQHILQLAMKERNFQLPNSDNLLFPVRSNKDGEVIEPGIMLHTVALQTILCATADWSKTISYLLTSGEMGSTGSRLLPIGSREFVPRSARGRLVSQHSLPMTGRKHGLVNGKTLGHSAASCVDQCDK…
Eurotiomycetes	Aspergillus_latus_na_GCA_041682755.1	SAT-KS-AT-DH-xCP-xCP-MT	MALAPSALVFGSQTTLPSVEAALRLRAALLLDPRLYPLRISIESLPEIWPVLTVSDPALERVAGPAEKALRQLCRWISHEEFPDSTEISELPATFVTPLTVILHTILYVRYTSEDGGLGHAGVLRAVQSNGGVQGFCTGLLTAATVATSPDLEALSRQASVALRLAVAIGAYIDLDLIDSDVSSVAVRSRAGKKGLEDCLVQFPGAYISVITDELNATVTAPTASLDALSQSLASNGLSAKRFDLRGRFHHPAHKKALESLRKLVASNRGFQFLHSELLVPVYANINGQILSSDSIIDTLLQSILVQRCDWYTSISTAFHKCSSGEKTNIVQFSLVECIPPSFTRQARLSVQRIADVPVQRLPTTLPASLNTVGTRAPTSEPVAIIGMGCKFPGADTLE…
Eurotiomycetes	Aspergillus_latus_na_GCA_041682755.1	SAT-KS-AT-PT-xCP	MKDNTHSTTLIFFGNEFPNDDLKGLFRCLLRLSKDRRFRQLAVFLEESTLVLKKEVAALPQPLRDLVPHFHTVLPLAELGDFRQGPLGAAMESALLTVLELGMFIGHYEAEGRDWNLLEHNTTLAGLSIGLLAAAGVALSTNLAEVAQNGAECVRVSFRLGVYVSEISRKLEAPQADGTLLSWAHVVTGETKSAIQDELSKYNSESGTPELLKVFISAADKTSVSVSGPPSRMKACFSSSHLLRYSKSFALPVYDGLCHASHLYNEDSINTVINSAESVIPVSRPVQLSLHSSNTGQPFPAATAHELFQAIGKELLTGTIYLDNIIDGIIKRIGEFNPSDLQVETFRTSIVFKSVRAALEGEFSDLKINITDLIPWAFRDYGPRLPRSFAHSKLAVVGM…
Eurotiomycetes	Aspergillus_latus_na_GCA_041682755.1	SAT-KS-AT-PT-xCP	MPVYTPQSGSLPEYSKMKLLYFSNEFPKDDLQGLFRRLYNQSKYRRYPILARFIHEATLAVREEVRQLPTAVKALVPAFETVLNLADYPELRKGPLGGSLEGVLLCATDCCSYYENAPERFDLHAVSTYLAGLGLGLLSTAAVALCSALADVPVIGAEVVRVSFRLGTLVDEISQNLEPRDTSSSPDTWASVVPGAKVEEVQAELDAIHAREKTPQPSKIFISAWNEGSVTISGPPSRIKRVLRLSEFFRRHKVVSLPVYSGLCHAKHLYNEKHAPIPVYQTSTGRPFTASTAKGLFEQLVLELLTQPILWDNVVQGVVDQAYATSATSCDILVFRISVPINDLRTALGSKLQGFETSTEELIPWMLQKSDMEIPRGTAQSKIAIIGMSCRMPGGATDT…
Eurotiomycetes	Aspergillus_latus_na_GCA_041682755.1	SAT-KS-AT-PT-xCP	MLHPTVVEGTMPLEEPALWYFGNEFPNDDVNELFRHLLQHSKDRRFRILSAYLEESTLVLQSEIAKLPHPVRSRVPHFDNIVTLSEEGYLRDLGLGAAMESAFLLILQLGLLIGYHEATGCELDLSKHTATIAGLSVGLFSGAALALSKTLSDVVKNGAECLRVSFRLGVYVAGFSSKLEAAQSDGMLNQSWAHVVTGMTEESLRSELARVNDELGNSDLSKVFISAADKSSVSVSGPPSRVKAAFLHSSDLRYSKSLPLPVYDGLCHADHLYSQDDVSAVLSLSESLIPPSRPLRVPLLSSSTGAPFAASTAGELLSEIVTELITGTIYLDHIVSGILWHIDSIPERHKCRINSFRTSIIFKSILEAVSEGFPGVTVKQNDLVDWVYQDYGSRRPNNP…
Eurotiomycetes	Aspergillus_latus_na_GCA_041682755.1	SAT-KS-AT-PT-xCP	MKLVYFSNEFPRDDLLDVFRRLHNHSKSHDQQTLAEFISRATWAIKDEVRQLSTELKKLIPPFDNLFSWAEDTELREGLICGAVDGVLLVVVQLATYIGYAEKHPKELLTNFSNTSLAGLGIGLLASTAVSLSSTLADLPRAGADAVRLAFRLGIHVQSVSANLEARELSERPDTWAYVVHNIDPDAAQKELDTIHSRQEIPDTGKIFVSAVSRTSVTLSGPPSRLKALFSTSHFFRDSKFIPLPVYGGLCHASHVYGLRDTQSIVHRSSLSTVSTKAWPATPVYSTSTGLHYQAKNAAELFEAVVSELLTQAIYWDRVIFGAVQKVETTSTSELVLYSFGNSIPLNDLTTALQSSITHPEVSINNLMTWVTQAAPADTLPRSPAQSKLAIVGMSCRLP…
Eurotiomycetes	Aspergillus_latus_na_GCA_041682755.1	SAT-KS-AT-PT-xCP	MKDNTHSTTLIFFGNEFPNDDLKGLFRCLLRLSKDRRFRQLAAFLEESTLVLKKEVAALPQPLRDLVPHFHTVLPIAELGDFRQGPLGAAMESALLTVLELGMFIGHYEAEGRDWNLLEHNTTLAGLSIGLLAAAGVALSTNLAEVAQNGAECVRVSFRLGVYVSEISRKLEAPQADGTLLSWAHVVTGETKSAIQDELSKYNSESGTPELLKVFISAADKTSVSVSGPPSRMKACFSSSHLLRYSKSFALPVYDGLCHASHLYNEDSINTVINSAESVIPVSRSVRLSLHSSNTGQPFPAATAHELFQAIGKELLTGTIYLDNIINGIIERIGGFNPSHLQVETFRTSIVFKSVRAALEGEFSDLEIKITDLVPWAFKDYGPRQPRSFAHSKLAVVGM…
Eurotiomycetes	Aspergillus_latus_na_GCA_041682755.1	SAT-KS-AT-PT-xCP	MKLIYFSNEFPKDDLQGLFRRLYNHSKDRRYPILARFIHEATLAVREEVRQLPTAVKALVPAFETVLNLADYPELRKGPLGGSLEGVLLCVLEIATLIGHVPRLYFKEAADCCSYYENAPERFDLHAVSTYLAGLGLGLLSTAAIALCSALADVPVIGAEVVRVSFRLGTLVDEISQNLEPRDTSGSPDTWASVVPGAKVEEVQAELDAIHTREKTPQPSKIFISAWNEGSVTISGPPSRIRRVLRLSEFFRRHKVVSLPVYSGLCHAKHLYNEQHAREIISTRSMYSIDALYSPAIPVYQTSTGRPFTASTAKGLFEQLVLELLTQPILWDNVVQGVVDQAYATSATSCDVLVFRISVPINDLRTALGSKLQGFETSTEELIPWILQKSDIRFPRGTA…
Eurotiomycetes	Aspergillus_latus_na_GCA_041682755.1	SAT-KS-AT-PT-xCP	MKLIYFSNEFPQDDLQTTFHELRIHSKDRRHQVLARFLQESTLAIREEIRQLPTALRRMIPPFETILDIAEFSDLRHGPLSGSIEGVLLCIVELGTLIVYYEDSPRAFEHGGADTALAGLGIGLLATAAVSLASTVADLAVTGAQVIRQAFRLGVLVDEVSQNLEPRDPTDTSSPDTWAYVLANVSAEEVQKELDLLQLDGKVPDTGKVFISALAATSVTISGPPARLKAMFRTSQFFHNHRCIPLPVYGGLCHAKHIYTEENVRQIVRTPSMALLDSRVLPRLPVYSTSTGKPFPAENASGLFEGIISEILTQAIQWDKVVRGVAYFAKDLKATRAQVVVFRISLPIHDLSETLKGAGLQTTIEEIMPWVHELRLSEDGGASGTQQSKIAIVGMSCRM…
Eurotiomycetes	Aspergillus_latus_na_GCA_041682755.1	SAT-KS-AT-PT-xCP	MADITHLKAGEVKPLEGNGSKVVFFGNEFPNDDLKLLFRHLHRHSKDRRFRLLSAFIHEATLVLKDEISKLPQLLQDQVPHFESVLTLAEHGDFRQGGLGAAMESALLVVLQLGTLIGAHEAEDKELDLDSSPTILAGLSIGLFAGAAVALSNTLADVLKNGAESLRVSFRLGVYVDDFSQKLEAPQPDGTPQSWAHVVTGMEAEDVQAELSKYNAESGGPELTKIFISAADKNSVSISGPPSRIKEAFQRSHALRYSKSFALPVYDGLCHAPHIYGQEDISAVLGESAALIPPSRPVRHALLSSRSGKPFTAATAGELFKEISTELITGTIYLDNITANIIDRIRSGLSGPPHELQVDTFRTSIVFKGIMGTIQAAFPEIQIRRNDFIDWIYKDFGHR…
Eurotiomycetes	Aspergillus_latus_na_GCA_041682755.1	SAT-KS-AT-PT-xCP-Te	MPTMAAKFQVIAFGDQAVPYQYELQGLITKENKVLKGFFSEAHHVLRTEISQLSPSERPRYPAATNLRELLDAHRSSKIQNCSLDSALVCVHQIAAFISYYSEKQTSYPAQASSCLVGSCTGLLAAVAVSCSQDLFDLVSFGPEIVRVAFRLGLVVQRKTSSVSLPNLDGSSSYSSVIAGINADSALRLTEKYCEDEALPPLARVYVGAVGQGSVTVSGPPARLLDFLRRNSSLKSGKVPVNGLFHSTNLYTAADTDSILESLQPSSQQRISRLDLLSNSNGQRISSISCGGLLKEAIWDILSRQLRWDLMIENAAITVTSSGATEATVLPFASSSGQSLASAIRQRGAKPVELLDSSVRSLDSNSSAGKTEGAAKRSKIAVIGFSGRFPEADDNEAFW…
Eurotiomycetes	Aspergillus_latus_na_GCA_041682755.1	SAT-KS-AT-PT-xCP-xCP-Te	MASHAEPTRLFLFGDQTYDFVADLRNLLNIRDNPILVAFLEQSHYVIRAQMIRELPPTVHKQARTASLAELLQKYVDRKLPSAFQTALSCITQIGLFMRQFDDPRVPYPHANDSYVLGVCTGSLAAAAISCSTSLSELLPIAVQTVLVAFRLGLWAQKVRDNLEISESNQTQPWSAVCHVPPEEAAIAIDRFSYEKALSNTRRPWITATSAKTTTVSASPDILSQLASQAPFTNSKLWREIPIYVPAHNNHLFSSKDVDDILATTNENPWSTVGAQIPFLSSVTGKLAWVRNYRDLLHLALSQCLIEPIRWDIVETEVPRIFKDRDGLDTLTIVAFTTVLSKNLSNALAAEGIKPVEPRSSSNKTPERYSHRPGSGRGKLAIVSMSGRFPEAPSTDSFW…
Eurotiomycetes	Aspergillus_latus_na_GCA_041682755.1	SAT-KS-AT-PT-xCP-xCP-Te	MEDPYRVYLFGDQTGDFEVGLRLLLQVKNHSLLSSFLQRSYHAVRQEISHLPPSERSTFPRFTSIVDLLARHCESPGNPAIESALTCLYQLGCFINYYGDLGHAFPSHSQSQLVGLCTGLLSCAAVSSASNIGELLKLAVEVVVVALRLGLCVHRVRKLFDQDQAVPLSWSALVSGLNESEGLSLIERFTSRNVIPPSSRPYISAVCANTLTISGPPVVLKQFLDTAISGKNKAVMVPIHGPFHASHLYEKRDVEWILRSCDVETVRSHKPRIPVLSSNTGKLIVVENMEDFLKIALEEILLRQMLWDKVTDSCISILKSVGDNKPKKLLPISSTATQSLFNSLKKSNLTNIDVDGGISDIAAETHHINQTGRAELSKIAIIGMSGRFPDADSPQDFWN…
Eurotiomycetes	Aspergillus_latus_na_GCA_041682755.1	SAT-KS-AT-PT-xCP-xCP-Te	MASNHVLLFPQERVAFDAVHDLNVRSKSRRRLQSLLAAASTLVQHQAASLDGLERADIGSFEDLVELAERQASQTRGSIVADLVLLTTVQIGQLLILAEDEPAILSGHGATRAIPVGFGAGLVAAGVAVAATTADEIVNLGLEAVSAAFRLGVELQRRGRDIEDSNGSWARVVSSTTSIADLEQALDKINASLRPINKAYIGEIMTESTVVFGPPSTLDALASRLELTHATITTSATALAQAPLHGAHLPSINEAKITNSSSSRQTTELWKLAVEEVATRPIDIHQTVAALVNDLHKANITDIILTAIGTSTEASGIQSLLEKNGIAVELGQLSPTPKPYGNDINSIPADAIAIVGMSGRFPNSDTLDEFWRLLETATTTHQIIPESRFNVDDFYDPTR…
Eurotiomycetes	Aspergillus_latus_na_GCA_041682755.1	SAT-KS-AT-PT-xCP-xCP-Te	MEDPYRVYLFGDQTGDFEVGLRRLLQAKNHSLLSSFLQRSYHAVRQEISHLPPSERSTFPRFTSIVDLLARHCESPGNPAIESALTCIYQLGCFINYYGDLGHTFPSHSQSQLVGLCTGLLSCAAVSSASNIGELLKPAVEVVVVALRLGLCVYRVRKLFGRDQAVPLSWSALVSGLSESEGKSLIDKFTSRNVIPPSSRPYISAVCANTLTISGPPVVLNQFLDTFISGKNKAVMVPIHGPFHASHLYEKRDVEWILKSCNVDTIRNHKPRIPVLSSNTGELIVVENMEGFLKIALEEILLRQMSWDKVTDSCISILKSVGDNKPKKLLPISSTATQSLFNSLKKSNLVNLDVDGGISDVTAETQFVNQTGRAELSKIAIIGMSGRFPEAESPQDFWN…
Eurotiomycetes	Aspergillus_latus_na_GCA_041682755.1	SAT-KS-AT-PT-xCP-xCP-Te	MASHTEPTRLFLFGDQTYDFVADLRELLNVRNNPILVAFLEQSHYVIRGQMIRELPPKEHKQARTASLAELLQKYADRKLPSAFQTALSCITQIGLFMRQFDEPCVPYPHANDSYVLGVCTGSLAAAAISCSTSLSELLPIAVQTVLVAFRLGLWAQKVRDNLEISEYNQTRHWSAVCQVPPEEAAVAIDKFSYEKALSNTRRPWITATSPKTTTVSASPDILSELASQVPFTNSKLWREIPIYVPAHNSHLFSSRDVDDILGTTNENPWSTFGAQIPFLSSVTGKLAWVRNYRDLLQLALTQCLIEPIRWDVVETEVPRLFKDRDGLDTLTIIPFTTVLSKSLSSALVAEGIKPAEPRCFFNQTTERYSHRPGSDRGTLAIVSMSGRFPEAPSTDSFW…
Eurotiomycetes	Aspergillus_latus_na_GCA_041682755.1	SAT-KS-AT-PT-xCP-xCP-Te	MAPYHVLFFPQERVTFDAVHDLNVRSKSRRRLQSLLAAASTVVQHQIASLDGLERADIGSFEDLVELAERQTTQTRGSIVADLVLLTTVQIGQLLVLAEDDPAILSGHGGARATPMGFGAGLVAAGVAAAATTADGIVNLGLEAVSVAFRLGVELQRRGKDIEDSNGPWARVVSSATTIADLEQALDKINASLRPINQAYIGEVMTESTVVFGPPSTLDALASRLELAHATVTTPASALAQVPLHGAHLPPVSAAMIAASSSQQATELWRLAVEEVANKPIDIHQAVTALIHDLHRANITEIVLTAIGASTETSGIQSLLEKNGLAVELGQLSPTPRPYGNDLDSIPADAIAVVGMSGRFPNSDTLDEFWRLLETATTTHQVIPESRFNVDDFYDPTRA…
Eurotiomycetes	Aspergillus_latus_na_GCA_041682755.1	SAT-KS-AT-xCP	MEPSPKTTFKVIIVGGSIAGLTLAHCLAKLPNVDFVILEKRAEIAPQEGASIGILPHGGRILDQLSLFEEIQRHVEPLTTAHVSYPDGFRHTNRSPTVLLERFGLPLAFLERRKLLHILYTSLPDPSRVLVEKSVVSVEQDMTVLTDDGSIYHGDLVVGADGVHSRVRREMWRLAELEQPGLITAREKNGMRVDYACIFGISDPFPGPLPGEQVASLHDGRSFLTFPGKDGRVFWFFLRKLDKQYPYTSAPRWSSTDIEKTAELFAADHIWNGVQFGDLWKRRQVVGITNLEEGVFSTWHCGRVVCIGDSMHKMAPNTGQGANCAIEDAAALANAISMAIKHDQHPSQATIHSLLQSVSKTRLARVQKIYKSARLVIRLHARESFPLRLVGRYYLPYSG…
Eurotiomycetes	Aspergillus_latus_na_GCA_041682755.1	SAT-KS-AT-xCP-MT-Red	MVEHRDITRLPLSRHEILLFGPLALSFDQAAFEHLRKTIVNSEEHRWALEALISLPQYYTTILAALPGINARNGVQVEDLKGTLQSGKPLATSFPLPNTLLIPLIMVLHLTEYSTFLRQTSEELESGIDLFSASRHNKETVGFCTGLLSAMAVSSGSNQEEFRKYAAVAVRLGLLVGMVVDAQDLSSAHGPSRSISASWNSAEKREDARRIMDDFPQAYISVYYDEDRATITAPASTISDLHQRLRASGIVTAEIGLNGCFHAECYRDQLGPIIQFCDSHPDFQLPDASTVFIPTRSNATGEMIREGALHRHALRSILVEPPQWFQSFTAVRDACAKDEGAVIVSFGPERCVPPSLLRGLSQKVVTVEDLAVFKRHQYSYSENDIAVVGMSCKVAGADN…
Eurotiomycetes	Aspergillus_latus_na_GCA_041682755.1	SAT-KS-AT-xCP-MT-Red	MIESTSHLTLRPKAFVFGPQNLSFDIGSFRKLHAQIQDHQWVRDVLVDLPKYWNGFSAGDPKLQHVNAEGLLESLKAWISNGDVPMDAFPLPNVLLSPLVVVGQLVEYLAFLKAAFPNLGKNDDMPSLISEDIEALGLCTGTLSAFTVASASTIEEIHQHGGVAVRLAMLAGAIVDAEETSSGPEGESVSFSVAWNSTKLGDLFADLLVNFSDAYVSVVVDERRATVTTSKKTAPDVIEQLKQDGAHVTSIALSGRFHWRQHRDPALRLIHYCDLDPSLQLPDATNLRLQGRSAANGRLITTGKLHELAIRAILLEEAQWYKTCRIAYSSSFIMDDAAVICFGPERAMPPTLARKIGPRLTYISDIDISSSPLLRQLLGGTQNVDLADLPDERIAVIGM…
Eurotiomycetes	Aspergillus_latus_na_GCA_041682755.1	SAT-KS-AT-xCP-MT-Red	MARSSAPGPGHEASTVFLFGPHVGTFTKASMDKLVRPLSQSPQRDWILHTIADLPTYWDALAAKMPDVARDIDGPASLSELDRWLRHGLDKAGLSVPDDETLPSILVGPLVVLIQLTQYWRHLETIRDGSAPAADLQAELVQQTQSGDKPTIILGFCAGLLAALSVASASNQAGFEEYGAVAVRLAMLIGALIDAQEVWDKASGKGSSASYAVAWRGQKQEDEMNRIIGDLSNDAYVAVRYDQARATVTASETIAPLLMKRLKAAGVTVAEVGIKGQIHSPNADRRQHTNALVELCTSLPGLQYAEASKLALQTYDNQGSSTPVSGSENMTEMVVRSILVQQCRWFDTFSAVVDALPDPYVVTFGLERCVPPTLMRSLGGRQVFYEDLPKDPEKPSFWL…
Eurotiomycetes	Aspergillus_latus_na_GCA_041682755.1	SAT-KS-AT-xCP-MT-Red	MLDHRDFTRLPLSRREFLLFGPLVLSFDQAAFEHLRKTIVNSEEHRWALEVLSSLPQYYTTIVHAFPGINGRNEVQLEDLKGALQSGKPLATSFPLPNALLIPLVMVLHLTEYSRFLHQTSEELESGIDLFDASRHNKETVGFCTGLLSAMAVSSAGSREEFRKYAAVAVRLGLLVGMVVDAQDISSAQGPSKSISASWNSAQKREDARRIMDEFPQAYISVYYDEDRATITAPASEISDLHRRLRASGIVTAEIGLNGCFHAECYRDQLDPIIQFCDSHSDFQLPDASKVVIPTRSNASGELIREGALHQHALRSILVEPPQWFESFTAVRDACAKDEGAVIFSFGPERCVPPSLLRGLSQKVVTVEDLDVFKRYQYSYSENDIAVVGMSCKVAGADN…
Eurotiomycetes	Aspergillus_latus_na_GCA_041682755.1	SAT-KS-AT-xCP-MT-Red	MARSSAPGPGHEASTVFLFGPHVGTFTKASMDKLVRPLSQSPQRDWILRTIADLPTYWDALAAKMPDVARDVDGPASLSELDRWLRYGLGKAALSVPDDESLPSILVGPLVVLIQLTQYWRHLEMIRDGSAPAADLQAELVQQTQSGSRPTAILGFCAGLLAALSVASASNQAGFEEYGAVAVRLAMLIGALIDAQEVWDKASGKGSSASYAVAWRGQKQEDEMNRIIGDLSNDAYVAVRYDQARATVTASETIAPLLMKRLKAAGVTVAEVGIKGQIHSPNADRKQHTNALVELCASLPGLQYAEVSKLALQTYDNQGSGTPVSGSGNMTEMVVRSILVQQCRWFDTFSAVADALPDPYVVTFGLERCVPPTLMRSLGGRQVFYEDLPKDPEKPSFWL…
Eurotiomycetes	Aspergillus_latus_na_GCA_041682755.1	SAT-KS-AT-xCP-Red	MQGSSHTLLAFGPQSLSFDKRALIKLRGDISSSRYGQWIQDTIAGLPGFWTALSEALPELRELLPPQERLQDLDQLLNHNIDDIEEGLSISNMILTPLVVLTHLTEYERYLATNQHTSDRTTATGFCTGLLSTFAIASARSDQEIAKYGAVALRLAMLVGALVDAEERRQELQGNGRSVSYSIAWTSEEQQQRLQEILSQRHPETYLSVRYDRARATLTSSGRAAADLAHELREIGLTVAQVRLQGRFHDPSESRKAYTDALADLCNRTPELQFAPTPAMSLAYPKIDNASLQEVAVRSMLVQHCDWYDTFKAAYPEVSSPSRVVCFGSERCIPPTLAKRTVKIESQHQGSDAFASLNQDNMIAVVGMSIKTAGADDVDEFAQMLRTGTSQHQEIREDD…
Eurotiomycetes	Aspergillus_latus_na_GCA_041682755.1	SAT-KS-AT-xCP-Red	MQGSSHTLLAFGPQSLSFDKRALNKLRGDISSSRYRQWIQDTITGLPGFWTALSEALPELRELLPPQERLQDLDRLLNHNIDETEEGLSISNMILTPLVVLTHLTEYERYLATNQHAGDRTTATGFCTGLLSTFAIASSRTDQEIAKYGAVALRLAMLVGALVDAEERRQELQGNGRSVSYSIAWTSEEQQQRLQEILSQRHPEAYLSVRYDRARATLTISGRAAPALAQELREIGLTVAQVRLQGRFHDPSESRKAHTDALADLCNRTAELQFAPTPAMSLAYPNNDNASLHEVAVRSMLVQHCDWYNTFKAAYSDVSNPSRVVCFGSERCIPPTLAKRTVKIESQHQGSDAFASLDRDNMIAVVGMSIKTAGADDLDEFAQMLRTGKSQHQAVREDD…
Eurotiomycetes	Aspergillus_latus_na_GCA_041682775.1	A-MT-xCP-KS-AT-xCP	MDTTTVHGSNAMTAQLNAPDDPTTLGHCVHKLFEHAADRYADKTALSCTTKELSYRDLNARANRLALLLARRGIARGDLVVVALDRSLNLVAALLAVLKTGAAYVPLDPSFPLERIRHMMEDAQPKLIVTCDTIRDALSSWKELFVNIDVVHDTSNTDVGNLKADVQTDDLAYVIYTSGSTGKPKGVEVSHGAVSNLLLSMRQDPGCGDSDRLLAVTTVSFDIAVLELFLPLICGATTVIAQEHEVADAGALLGLIEYHRVGIMQGTPATWQILLDSGWCGTPRLDKILCGGEALSRRLADRLLCCADAVWNMYGPTEATVWASIWRVRYGDDIIVGSPVANTQLYVLDTDLSPVPPGSAGELYIGGAGVARGYHNNPKLTRSQFLQTPFRPGTIYRTG…
Eurotiomycetes	Aspergillus_latus_na_GCA_041682775.1	SAT-KS-AT-DH-xCP-MT	MILGTECPEGSIRLLFGPQYTDWGDPVARIRDALEKYPSGLQFFFEILDELPSLWAIMTDAWPALDRIPGERGLTALSQIINNEISASHMNERSNIILTPLTVMAHLAEFWGLQDVAAHPAFPPESSAKYPPTAVPRIIDTQGFCVGILAAIVVACSRDSHEFRMVASSAIRLAVCIGALVDLDETAFGNATSMAVRWESQDGYDRLQKVLVQDPTVKKIYISCHTDVNTITITLPQDTFPWVKQQVSGFRLWSKQIPLRGRFHYNGAHAEGVQHILQLAMKERNFQLPNSDNLLFPVRSNKDGEVIEPGIMLHTVALQTILCATADWSKTISYLLTSGEMGSTGSRLLPIGSREFVPRSARGRLVSQHSLPMTGRKHGLVNGKTLGHSAASCVDQCDK…
Eurotiomycetes	Aspergillus_latus_na_GCA_041682775.1	SAT-KS-AT-DH-xCP-xCP-MT	MALAPSALVFGSQTTLPSVEAALRLRAALLLDPRLYPLRISIESLPEIWPVLTVSDPALERVAGPAEKALRQLCRWISHEEFPDSTEISELPATFVTPLTVILHTILYVRYTSEDGGLGHAGVLRAVQSNGGVQGFCTGLLTAATVATSPDLEALSRQASVALRLAVAIGAYIDLDLIDSDVSSVAVRSRAGKKGLEDCLVQFPGAYISVITDELNATVTAPTASLDALSQSLASNGLSAKRFDLRGRFHHPAHKKALESLRKLVASNRGFQFLHSELLVPVYANINGQILSSDSIIDTLLQSILVQRCDWYTSISTAFHKCSSGEKTNIVQFSLVECIPPSFTRQARLSVQRIADVPVQRLPTTLPASLNTVGTRAPTSEPVAIIGMGCKFPGADTLE…
Eurotiomycetes	Aspergillus_latus_na_GCA_041682775.1	SAT-KS-AT-PT-xCP	MPVYTPQSGSLPEYSKMKLLYFSNEFPKDDLQGLFRRLYNQSKYRRYPILARFIHEATLAVREEVRQLPTAVKALVPAFETVLNLADYPELRKGPLGGSLEGVLLCATDCCSYYENAPERFDLHAVSTYLAGLGLGLLSTAAVALCSALADVPVIGAEVVRVSFRLGTLVDEISQNLEPRDTSSSPDTWASVVPGAKVEEVQAELDAIHAREKTPQPSKIFISAWNEGSVTISGPPSRIKRVLRLSEFFRRHKVVSLPVYSGLCHAKHLYNEKHAPIPVYQTSTGRPFTASTAKGLFEQLVLELLTQPILWDNVVQGVVDQAYATSATSCDILVFRISVPINDLRTALGSKLQGFETSTEELIPWMLQKSDMEIPRGTAQSKIAIIGMSCRMPGGATDT…
Eurotiomycetes	Aspergillus_latus_na_GCA_041682775.1	SAT-KS-AT-PT-xCP	MLHPTVVEGTMPLEEPALWYFGNEFPNDDVNELFRHLLQHSKDRRFRILSAYLEESTLVLQSEIAKLPHPVRSRVPHFDNIVTLSEEGYLRDLGLGAAMESAFLLILQLGLLIGYHEATGCELDLSKHTATIAGLSVGLFSGAALALSKTLSDVVKNGAECLRVSFRLGVYVAGFSSKLEAAQSDGMLNQSWAHVVTGMTEESLRSELARVNDELGNSDLSKVFISAADKSSVSVSGPPSRVKAAFLHSSDLRYSKSLPLPVYDGLCHADHLYSQDDVSAVLSLSESLIPPSRPLRVPLLSSSTGAPFAASTAGELLSEIVTELITGTIYLDHIVSGILWHIDSIPERHKCRINSFRTSIIFKSILEAVSEGFPGVTVKQNDLVDWVYQDYGSRRPNNP…
Eurotiomycetes	Aspergillus_latus_na_GCA_041682775.1	SAT-KS-AT-PT-xCP	MKDNTHSTTLIFFGNEFPNDDLKGLFRCLLRLSKDRRFRQLAAFLEESTLVLKKEVAALPQPLRDLVPHFHTVLPIAELGDFRQGPLGAAMESALLTVLELGMFIGHYEAEGRDWNLLEHNTTLAGLSIGLLAAAGVALSTNLAEVAQNGAECVRVSFRLGVYVSEISRKLEAPQADGTLLSWAHVVTGETKSAIQDELSKYNSESGTPELLKVFISAADKTSVSVSGPPSRMKACFSSSHLLRYSKSFALPVYDGLCHASHLYNEDSINTVINSAESVIPVSRSVRLSLHSSNTGQPFPAATAHELFQAIGKELLTGTIYLDNIINGIIERIGGFNPSHLQVETFRTSIVFKSVRAALEGEFSDLEIKITDLVPWAFKDYGPRQPRSFAHSKLAVVGM…
Eurotiomycetes	Aspergillus_latus_na_GCA_041682775.1	SAT-KS-AT-PT-xCP	MKLIYFSNEFPKDDLQGLFRRLYNHSKDRRYPILARFIHEATLAVREEVRQLPTAVKALVPAFETVLNLADYPELRKGPLGGSLEGVLLCVLEIATLIGHVPRLYFKEAADCCSYYENAPERFDLHAVSTYLAGLGLGLLSTAAIALCSALADVPVIGAEVVRVSFRLGTLVDEISQNLEPRDTSGSPDTWASVVPGAKVEEVQAELDAIHTREKTPQPSKIFISAWNEGSVTISGPPSRIRRVLRLSEFFRRHKVVSLPVYSGLCHAKHLYNEQHAREIISTRSMYSIDALYSPAIPVYQTSTGRPFTASTAKGLFEQLVLELLTQPILWDNVVQGVVDQAYATSATSCDVLVFRISVPINDLRTALGSKLQGFETSTEELIPWILQKSDIRFPRGTA…
Eurotiomycetes	Aspergillus_latus_na_GCA_041682775.1	SAT-KS-AT-PT-xCP	MKDNTHSTTLIFFGNEFPNDDLKGLFRCLLRLSKDRRFRQLAVFLEESTLVLKKEVAALPQPLRDLVPHFHTVLPLAELGDFRQGPLGAAMESALLTVLELGMFIGHYEAEGRDWNLLEHNTTLAGLSIGLLAAAGVALSTNLAEVAQNGAECVRVSFRLGVYVSEISRKLEAPQADGTLLSWAHVVTGETKSAIQDELSKYNSESGTPELLKVFISAADKTSVSVSGPPSRMKACFSSSHLLRYSKSFALPVYDGLCHASHLYNEDSINTVINSAESVIPVSRPVQLSLHSSNTGQPFPAATAHELFQAIGKELLTGTIYLDNIIDGIIKRIGEFNPSDLQVETFRTSIVFKSVRAALEGEFSDLKINITDLIPWAFRDYGPRLPRSFAHSKLAVVGM…
Eurotiomycetes	Aspergillus_latus_na_GCA_041682775.1	SAT-KS-AT-PT-xCP	MKLIYFSNEFPQDDLQTTFHELRIHSKDRRHQVLARFLQESTLAIREEIRQLPTALRRMIPPFETILDIAEFSDLRHGPLSGSIEGVLLCIVELGTLIVYYEDSPRAFEHGGADTALAGLGIGLLATAAVSLASTVADLAVTGAQVIRQAFRLGVLVDEVSQNLEPRDPTDTSSPDTWAYVLANVSAEEVQKELDLLQLDGKVPDTGKVFISALAATSVTISGPPARLKAMFRTSQFFHNHRCIPLPVYGGLCHAKHIYTEENVRQIVRTPSMALLDSRVLPRLPVYSTSTGKPFPAENASGLFEGIISEILTQAIQWDKVVRGVAYFAKDLKATRAQVVVFRISLPIHDLSETLKGAGLQTTIEEIMPWVHELRLSEDGGASGTQQSKIAIVGMSCRM…
Eurotiomycetes	Aspergillus_latus_na_GCA_041682775.1	SAT-KS-AT-PT-xCP-xCP-Te	MEDPYRVYLFGDQTGDFEVGLRRLLQAKNHSLLSSFLQRSYHAVRQEISHLPPSERSTFPRFTSIVDLLARHCESPGNPAIESALTCIYQLGCFINYYGDLGHTFPSHSQSQLVGLCTGLLSCAAVSSASNIGELLKPAVEVVVVALRLGLCVYRVRKLFGRDQAVPLSWSALVSGLSESEGKSLIDKFTSRNVIPPSSRPYISAVCANTLTISGPPVVLNQFLDTFISGKNKAVMVPIHGPFHASHLYEKRDVEWILKSCNVDTIRNHKPRIPVLSSNTGELIVVENMEGFLKVALEEILLRQMSWDKVTDSCISILKSVGDNKPKKLLPISSTATQSLFNSLKKSNLVNLDVDGGISDVTAETQFVNQTGRAELSKIAIIGMSGRFPEAESPQDFWN…
Eurotiomycetes	Aspergillus_latus_na_GCA_041682775.1	SAT-KS-AT-PT-xCP-xCP-Te	MASHTEPTRLFLFGDQTYDFVADLRELLNVRNNPILVAFLEQSHYVIRGQMIRELPPKEHKQARTASLAELLQKYADRKLPSAFQTALSCITQIGLFMRQFDEPCVPYPHANDSYVLGVCTGSLAAAAISCSTSLSELLPIAVQTVLVAFRLGLWAQKVRDNLEISEYNQTRHWSAVCQVPPEEAAVAIDKFSYEKALSNTRRPWITATSPKTTTVSASPDILSELASQVPFTNSKLWREIPIYVPAHNSHLFSSRDVDDILGTTNENPWSTFGAQIPFLSSVTGKLAWVRNYRDLLQLALTQCLIEPIRWDVVETEVPRLFKDRDGLDTLTIIPFTTVLSKSLSSALVAEGIKPAEPRCFFNQTTERYSHRPGSDRGTLAIVSMSGRFPEAPSTDSFW…
Eurotiomycetes	Aspergillus_latus_na_GCA_041682775.1	SAT-KS-AT-PT-xCP-xCP-Te	MAPYHVLFFPQERVTFDAVHDLNVRSKSRRRLQSLLAAASTVVQHQIASLDGLERADIGSFEDLVELAERQTTQTRGSIVADLVLLTTVQIGQLLVLAEDDPAILSGHGGARATPMGFGAGLVAAGVAAAATTADGIVNLGLEAVSVAFRLGVELQRRGKDIEDSNGPWARVVSSATTIADLEQALDKINASLRPINQAYIGEVMTESTVVFGPPSTLDALASRLELAHATVTTPASALAQVPLHGAHLPPVSAAMIAASSSQQATELWRLAVEEVANKPIDIHQAVTALIHDLHRANITEIVLTAIGASTETSGIQSLLEKNGLAVELGQLSPTPRPYGNDLDSIPADAIAVVGMSGRFPNSDTLDEFWRLLETATTTHQVIPESRFNVDDFYDPTRA…
Eurotiomycetes	Aspergillus_latus_na_GCA_041682775.1	SAT-KS-AT-PT-xCP-xCP-Te	MEDPYRVYLFGDQTGDFEVGLRLLLQVKNHSLLSSFLQRSYHAVRQEISHLPPSERSTFPRFTSIVDLLARHCESPGNPAIESALTCLYQLGCFINYYGDLGHAFPSHSQSQLVGLCTGLLSCAAVSSASNIGELLKLAVEVVVVALRLGLCVHRVRKLFDQDQAVPLSWSALVSGLNESEGLSLIERFTSRNVIPPSSRPYISAVCANTLTISGPPVVLKQFLDTAISGKNKAVMVPIHGPFHASHLYEKRDVEWILRSCDVETVRSHKPRIPVLSSNTGKLIVVENMEDFLKIALEEILLRQMLWDKVTDSCISILKSVGDNKPKKLLPISSTATQSLFNSLKKSNLTNIDVDGGISDIAAETHHINQTGRAELSKIAIIGMSGRFPDADSPQDFWN…
Eurotiomycetes	Aspergillus_latus_na_GCA_041682775.1	SAT-KS-AT-PT-xCP-xCP-Te	MASNHVLLFPQERVAFDAVHDLNVRSKSRRRLQSLLAAASTLVQHQAASLDGLERADIGSFEDLVELAERQASQTRGSIVADLVLLTTVQIGQLLILAEDEPAILSGHGATRAIPVGFGAGLVAAGVAVAATTADEIVNLGLEAVSAAFRLGVELQRRGRDIEDSNGSWARVVSSTTSIADLEQALDKINASLRPINKAYIGEIMTESTVVFGPPSTLDALASRLELTHATITTSATALAQAPLHGAHLPSINEAKITNSSSSRQTTELWKLAVEEVATRPIDIHQTVAALVNDLHKANITDIILTAIGTSTEASGIQSLLEKNGIAVELGQLSPTPKPYGNDINSIPADAIAIVGMSGRFPNSDTLDEFWRLLETATTTHQIIPESRFNVDDFYDPTR…
Eurotiomycetes	Aspergillus_latus_na_GCA_041682775.1	SAT-KS-AT-PT-xCP-xCP-Te	MASHAEPTRLFLFGDQTYDFVADLRNLLNIRDNPILVAFLEQSHYVIRAQMIRELPPTVHKQARTASLAELLQKYVDRKLPSAFQTALSCITQIGLFMRQFDDPRVPYPHANDSYVLGVCTGSLAAAAISCSTSLSELLPIAVQTVLVAFRLGLWAQKVRDNLEISESNQTQPWSAVCHVPPEEAAIAIDRFSYEKALSNTRRPWITATSAKTTTVSASPDILSQLASQAPFTNSKLWREIPIYVPAHNNHLFSSKDVDDILATTNENPWSTVGAQIPFLSSVTGKLAWVRNYRDLLHLALSQCLIEPIRWDIVETEVPRIFKDRDGLDTLTIVAFTTVLSKNLSNALAAEGIKPVEPRSSSNKTPERYSHRPGSGRGKLAIVSMSGRFPEAPSTDSFW…
Eurotiomycetes	Aspergillus_latus_na_GCA_041682775.1	SAT-KS-AT-xCP	MEPSPKTTFKVIIVGGSIAGLTLAHCLAKLPNVDFVILEKRAEIAPQEGASIGILPHGGRILDQLSLFEEIQRHVEPLTTAHVSYPDGFRHTNRSPTVLLERMTVLTDDGSIYHGDLVVGADGVHSRVRREMWRLAELEQPGLITAREKNGMRVDYACIFGISDPFPGPLPGEQVASLHDGRSFLTFPGKDGRVFWFFLRKLDKQYPYTSAPRWSSTDIEKTAELFAADHIWNGVQFGDLWKRRQVVGITNLEEGVFSTWHCGRVVCIGDSMHKMAPNTGQGANCAIEDAAALANAISMAIKHDQHPSQATIHSLLQSVSKTRLARVQKIYKSARLVIRLHARESFPLRLVGRYYLPYSGDLPADTASKLIELLQAFLLERLRVCLSQLDINRRVKEIT…
Eurotiomycetes	Aspergillus_latus_na_GCA_041682775.1	SAT-KS-AT-xCP-MT-Red	MARSSAPGPGHEASTVFLFGPHVGTFTKASMDKLVRPLSQSPQRDWILHTIADLPTYWDALAAKMPDVARDIDGPASLSELDRWLRHGLDKAGLSVPDDETLPSILVGPLVVLIQLTQYWRHLETIRDGSAPAADLQAELVQQTQSGDKPTIILGFCAGLLAALSVASASNQAGFEEYGAVAVRLAMLIGALIDAQEVWDKASGKGSSASYAVAWRGQKQEDEMNRIIGDLSNDAYVAVRYDQARATVTASETIAPLLMKRLKAAGVTVAEVGIKGQIHSPNADRRQHTNALVELCTSLPGLQYAEASKLALQTYDNQGSSTPVSGSENMTEMVVRSILVQQCRWFDTFSAVVDALPDPYVVTFGLERCVPPTLMRSLGGRQVFYEDLPKDPEKPSFWL…
Eurotiomycetes	Aspergillus_latus_na_GCA_041682775.1	SAT-KS-AT-xCP-MT-Red	MLDHRDFTRLPLSRREFLLFGPLVLSFDQAAFEHLRKTIVNSEEHRWALEVLSSLPQYYTTIVHAFPGINGRNEVQLEDLKGALQSGKPLATSFPLPNALLIPLVMVLHLTEYSRFLHQTSEELESGIDPFDASRHNKETVGFCTGLLSAMAVSSAGSREEFRKYAAVAVRLGLLVGMVVDAQDISSAQGPSKSISASWNSAQKREDARRIMDEFPQAYISVYYDEDRTTITAPASEISDLHRRLRASGIVTAEIGLNGCFHAECYRDQLDPIIQFCDSHSDFQLPDASKVVIPTRSNASGELIREGALHQHALRSILVEPPQWFESFTAVRDACAKDEGAVIFSFGPERCVPPSLLRGLSQKVVTVEDLDVFKRYQYSYSENDIAVVGMSCKVAGADN…
Eurotiomycetes	Aspergillus_latus_na_GCA_041682775.1	SAT-KS-AT-xCP-MT-Red	MVEHRDITRLPLSRHEILLFGPLALSFDQAAFEHLRKTIVNSEEHRWALEALISLPQYYTTILAALPGINARNGVQVEDLKGTLQSGKPLATSFPLPNTLLIPLIMVLHLTEYSTFLRQTSEELESGIDLFSASRHNKETVGFCTGLLSAMAVSSGSNQEEFRKYAAVAVRLGLLVGMVVDAQDLSSAHGPSRSISASWNSAEKREDARRIMDDFPQAYTSVYYDEDRATITAPASTISDLHQRLRASGIVTAEIGLNGCFHAECYRDQLGPIIQFCDSHPDFQLPDASTVFIPTRSNATGEMIREGALHRHALRSILVEPPQWFQSFTAVRDACAKDEGAVIVSFGPERCVPPSLLRGLSQKVVTVEDLAVFKRHQYSYSENDIAVVGMSCKVAGADN…
Eurotiomycetes	Aspergillus_latus_na_GCA_041682775.1	SAT-KS-AT-xCP-MT-Red	MARSSAPGPGHEASTVFLFGPHVGTFTKASMDKLVRPLSQSPQRDWILRTIADLPTYWDALAAKMPDVARDVDGPASLSELDRWLRYGLGKAALSVPDDESLPSILVGPLVVLIQLTQYWRHLEMIRDGSAPAADLQAELVQQTQSGSRPTAILGFCAGLLAALSVASASNQAGFEEYGAVAVRLAMLIGALIDAQEVWDKASGKGSSASYAVAWRGQKQEDEMNRIIGDLSNDAYVAVRYDQARATVTASETIAPLLMKRLKAAGVTVAEVGIKGQIHSPNADRKQHTNALVELCASLPGLQYAEVSKLALQTYDNQGSGTPVSGSGNMTEMVVRSILVQQCRWFDTFSAVADALPDPYVVTFGLERCVPPTLMRSLGGRQVFYEDLPKDPEKPSFWL…
Eurotiomycetes	Aspergillus_latus_na_GCA_041682775.1	SAT-KS-AT-xCP-MT-Red	MIESTSHLTLRPKAFVFGPQNLSFDIGSFRKLHAQIQDHQWVRDVLVDLPKYWNGFSAGDPKLQHVNAEGLLESLKAWISNGDVPMDAFPLPNVLLSPLVVVGQLVEYLAFLKAAFPNLGKNDDMPSLISEDIEALGLCTGTLSAFTVASASTIEEIHQHGGVAVRLAMLAGAIVDAEETSSGPEGESVSFSVAWNSTKLGDLFADLLVNFSDAYVSVVVDERRATVTTSKKTAPDVIEQLKQDGAHVTSIALSGRFHWRQHRDPALRLIHYCDLDPSLQLPDATNLRLQGRSAANGRLITTGKLHELAIRAILLEEAQWYKTCRIAYSSSFIMDDAAVICFGPERAMPPTLARKIGPRLTYISDIDISSSPLLRQLLGGTQNVDLADLPDERIAVIGM…
Eurotiomycetes	Aspergillus_latus_na_GCA_041682775.1	SAT-KS-AT-xCP-Red	MQGSSHTLLAFGPQSLSFDKRALNKLRGDISSSRYRQWIQDTITGLPGFWTALSEALPELRELLPPQERLQDLDRLLNHNIDETEEGLSISNMILTPLVVLTHLTEYERYLATNQHAGDRTTATGFCTGLLSTFAIASSRTDQEIAKYGAVALRLAMLVGALVDAEERRQELQGNGRSVSYSIAWTSEEQQQRLQEILSQRHPEAYLSVRYDRARATLTISGRAAPALAQELREIGLTVAQVRLQGRFHDPSESRKAHTDALADLCNRTAELQFAPTPAMSLAYPNNDNASLHEVAVRSMLVQHCDWYNTFKAAYSDVSNPSRVVCFGSERCIPPTLAKRTVKIESQHQGSDAFASLDRDNMIAVVGMSIKTAGADDLDEFAQMLRTGKSQHQAVREDD…
Eurotiomycetes	Aspergillus_latus_na_GCA_041682775.1	SAT-KS-AT-xCP-Red	MQGSSHTLLAFGPQSLSFDKRALIKLRGDISSSRYGQWIQDTIAGLPGFWTALSEALPELRELLPPQERLQDLDQLLNHNIDDIEEGLSISNMILTPLVVLTHLTEYERYLATNQHTSDRTTATGFCTGLLSTFAIASARSDQEIAKYGAVALRLAMLVGALVDAEERRQELQGNGRSVSYSIAWTSEEQQQRLQEILSQRHPETYLSVRYDRARATLTSSGRAAADLAQELREIGLTVAQVRLQGRFHDPSESRKAYTDALADLCNRTPELQFAPTPAMSLAYPKIDNASLQEVAVRSMLVQHCDWYDTFKAAYPEVSSPSRVVCFGSERCIPPTLAKRTVKIESQHQGSDAFASLNQDNMIAVVGMSIKTAGADDVDEFAQMLRTGTSQHQEIREDD…
Eurotiomycetes	Aspergillus_lentulus_IFM_54703_GCA_001445615.2	SAT-KS-AT-PT-xCP	MAKPRAQTVWFGNEFPSDDLKDLFRRLHQHSKDRRFRLLSVFLDESTAILKEEVANLPQQLQELVPHFDTACTLAEVDFRQGALGAAMESALLTILELGMLIGNYEAEDIEWDLDPSETLLAGLSIGILAGAAVALSSSLADVAKVGAESVRVSFRLGVYVADISTKLEAPQSDGTLQSWAHVVTGMSHEAVQEELSQFNAVTQNPELTKVFVSAADKTSVSVSGPPSRVKAAFQHSPSLRYSKSFPLPVYDGLCHAPHLYSLDDIEFVINSAKSVIPSSRPVRLPLISSQTGKPFAAKTAGELFLEIGTELLTGTIYVDNVTTGILEHVKLKEPTGSYRIDSFRMSQVLNGILTAIETDFPALERVRRDFVSWVYGDYGARRPSSYAASKLAIVGMAC…
Eurotiomycetes	Aspergillus_lentulus_IFM_54703_GCA_001445615.2	SAT-KS-AT-PT-xCP	MRPVDFTPSSESPTAEKGMKVVYFGNELPQDGLQGICRRLHAYTKDRHYPLLARFIEESTWAVRDEVRQLHAAQRALVTPFESVLHLAEQPELCKGPLCGSIEGVLLCVIQLGTFIGYYETSRNEYAFESAHTYLTGLGLGLLASTAVSLSPTLADLPLAGAEVVRVAFRLGVLVADVSQNLQPADAAGDRSSWAYVIPNITPSEAEEELTAIHTRENTPEASRIFISAISRTSVTISGPPARLKRLFRMSDFFRDRNFIALPVYGGLCHAKHIYSSQHARSVVQGRSIAALDTRFIGRYPILSTGSGEPFPTATTATELFEHVITEILTQAIEWENVIQGVVERAKLLSVSEVEIQVFRISVPVHDLLSALQTSIREGVEVTIKDLEPWITKAIDDEQ…
Eurotiomycetes	Aspergillus_lentulus_IFM_54703_GCA_001445615.2	SAT-KS-AT-PT-xCP	MDWTTETPNTEPSLVTATPSTTESLVDPAKMKVGYFGNEFPHDDLHDLSRRLYNWSKDRQHTLLATFIHEATSAVREEVRLLPATLRALIPPFETIFSLVSHADLRHGPLGGCIDGMLLCAVQLATFIGYYEDSTEDTFQWHNADACLAGLGTGLLSTVAVSVSPTLADMPVTGAEVVRIAFRLGILVHEVSRNLQAPASDGGPGDSWAYVVPDAVADDVQSELDAFHNAKKTPESSKVFISALSRTSVTISGPPTRLKDLFLVSDYFRDRRFVPLPVYGGLCHASHVYSKKHVDSIVNTESSSLVSLDSRLAPRVPIFATSNGKPFPAKTVSGLFRDIVEELLTQRIEWDNVIEGVIQHAKCTAVSETLVLMFRTSLPARDLVEALNSESLPFKGRTQ…
Eurotiomycetes	Aspergillus_lentulus_IFM_54703_GCA_001445615.2	SAT-KS-AT-PT-xCP-xCP-Red	MADHLELFLFGDQTYNPQPYLREMMCNRHNPALENFLSKSYDAIREELYSLPHEVRADMPRFTCLDDLILWKQDGRQCIPLDMALTCMYQLGAFISKTESGRYPAQDSAVLGICTGALAAAAVSCSRSTLELIPIAVDAVVLAFRTGKLVADITRTLEPLHAPVQSWSIFIRGPTSAEAVREFCEQTVLPLTRQPYISAFTPNGITVSGPPSSLTQMTVSSTFKDFRFDSINIYGPYHATHLYSQNDVEAIVGSLAPHGSDARRQMLLLSSTKTLVRAGGLDAIWRAAVEQILLQPICWSSIFDQLQATHRKVSPKTIRITPIGTKADQLIHTALKQTPLCESLTMPEKSLKAEPQTPYSNPGKPKLAIVGMSGRFPGANNNEAFWDLLYQGLDVHKPV…
Eurotiomycetes	Aspergillus_lentulus_IFM_54703_GCA_001445615.2	SAT-KS-AT-PT-xCP-xCP-Te	MAGPLKLYVFGDETGDFAEPLQRLCERRKEVLFLHFLEELNKVLRDEVRRQPRDVRLQIPEFTDVLDLVRHYRHSGSRNQILETTLTCVCQLATVISFFGNKTSQYFTPSDSVFAGFCTGLLSASSVATSQDTLQLITNALTTVRVAFRIGVKVNGAAQRLSKHGDAAAARSWTTLIIGAQKEASIEALAQFNESKGIPKANQAYISANSEDVVSISGPPETVASLLQHSEYLQKFRTVSLDIFAPFHAPHLYSDDDVAEVLRPFSDMDEKRKLFIPVISGVGTRYSPDLDVDTLMVDVVRDILIRPLLFENVMNTVTETTITSPRKDCQIFSVGPSQAINSLASTLRADTSLNVTTEGQLHTEKPDYEPLNGAQKIAIVGMAGRFPNSDDLESFWSTL…
Eurotiomycetes	Aspergillus_lentulus_IFM_54703_GCA_001445615.2	SAT-KS-AT-PT-xCP-xCP-Te	MSFTHILAFPDQHADLLGAMYDLNVRSKTRSLLRTFLSAAAAVVHEYVDSLDRPERARVGSFEDLVDLAERFAKQDHPSVVAEIVLFTTVQMGQLLILAEDNSSILSGTTGDVVLPVGFGIGLIAASIAATVTSTDAIISLGLQGIGIAVRLAVALERTGRAIQDSNGIWALAVPAFSQSGLEQQLETVNSTLGPLHQAYVGQVLPGSVVLFGPPSTLDTVAQGLGLASVVTRPDTFSRCPMYGSHLPPLDVDQVVAASAALELYQVKRPLFSAHSSTGSRSASTLAELLRRVVVEIAHKPMHIEKTVGALAAAIDASTKSDVVLTTVGSTWDASTIQELLVQHGQTVSLGEFPSCPTPFGSSLDSIPPDAIAVVGMSGRFPESDTLDEFWRLLETGTT…
Eurotiomycetes	Aspergillus_lentulus_IFM_54703_GCA_001445615.2	SAT-KS-AT-PT-xCP-xCP-Te	MEDLRRIYLFGDQTISCDEGLRNLLQAKNHTIVASFIERCFHALRQEITRLPPSQRTLFPRFTSIADLLARHRESGTNPALGSALTCIYQLGCFIDYHGDRGHPYPSSDDGLLGSCTGMLSCAAVSSCKNVGELLPLAVEVVKLTIHLGLCVMRVREMVDSSESSSGSWSILVSEINEADAANLISSFAKKRGITPSSQPYISAVGSKGLTISAPPDILDKFIEEGLPKEYKHFKAPGVSGPYHAPHLYNDREIREILSFCSDDVISRHTPRVPLVSSNTGKLVQVKSMRDLLKVALEEILLRKICWDKVTESCLSIVHAANDKPWRILPIASNATQGLVTALQRMGNCQVEVDTGVGAPQMDPAAPNATGNASRSKIAIIGMSGRFPEADGVEAFWDL…
Eurotiomycetes	Aspergillus_lentulus_IFM_54703_GCA_001445615.2	SAT-KS-AT-PT-xCP-xCP-Te	MHRPLQVECLNLVVLGDQTNNVSALLKELLLSAPCSVAQSEFIRDASEALRAQSERLRPFQREHLPGFQSIHDLARIYEKSKGEFTNPYFEGRGGRSENNEHIAVVGLCTGSLVAAAYATSASLDDLRLLAVPTVSMAFQMGLQAATASSMLHEQGNPLGSWSIAIPKMTEDEALSALKRYDAGGHLSLRHRCFVSAVGLKSVTISGSPPALGRFAESLTASQPSRKIVWLPIFAGYHASHIHTVLDFPSFLSRCGIDADLLCSFKSIKTLLSPLTGEPVDSNSALDLFKTVVHHTLQAPLRLDLIVDRCASLIRENTIASVRIDAVGPTPVADSLAAALRTRTSASVSTRELVVLEPGVDQYKPSAAFGQAPLAIVGMSGRFPGAESAEALWSVLESG…
Eurotiomycetes	Aspergillus_lentulus_IFM_54703_GCA_001445615.2	SAT-KS-AT-xCP-xCP	MASTLPSTVVCGSQTPPPSRDCLQRVQSNLKDSKLKELAKAVDDLPQFWSHLVEVKPVLSQVNDEPLKKLKDWAKDESLEIPEGLPNILLAPLTVIIHLVQYLRFAHSLDADDSQGDRHQRVLQSTCKGGFQGLCIGFLSAAALACSRTERDIWCNASVALRLATCVGAYVDLDELTYDSADVHSCMIIHWEDNSGKDRVTEVLKGYPGVYTSVELDDKSITVTAKESQVLSLRSDLAARDAKLTKIPIHGRYHSRKHAEILQDLLEICNNEESLRFPIINRPLVPLRNNTTGDLITSAEKLHELALKCVLTEPADWYSTMAETVSNLISQPETTEQPLILELGLVSCLPLSLTASANLRVLTPPLTSTISPNEQESSVNDEYRYDYPEHSIAVIGAAC…
Eurotiomycetes	Aspergillus_lentulus_PK20_01_GCA_023625555.1	SAT-KS-AT-PT-xCP	MDWTTETPNTEPSLVTATPSTTESLVDPAKMKVGYFGNEFPHDDLHDLSRRLYNWSKDRQHTLLATFIHEATSAVREEVRLLPATLRALIPPFETIFSLVSHADLRHGPLGGCIDGMLLCAVQLATFIGYYEDSTEDTFQWHNADACLAGLGTGLLSTVAVSVSPTLADMPVTGAEVVRIAFRLGILVHEVSRNLQAPASDGGPGDSWAYVVPDAVADDVQSELDAFHNAKKTPESSKVFISALSRTSVTISGPPTRLKDLFLVSDYFRDRRFVPLPVYGGLCHASHVYSKKHVDSIVNTESSSLVSLDSRLAPRVPIFATSNGKPFPAKTVSGLFRDIVEELLTQRIEWDNVIEGVIQHAKCTAVSETLVLMFRTSLPARDLVEALNSESLPFKGRTQ…
Eurotiomycetes	Aspergillus_lentulus_PK20_01_GCA_023625555.1	SAT-KS-AT-PT-xCP	MRPVDFTPSSESPTAEKGMKVVYFGNELPQDGLQGICRRLHAYTKDRRYPLLARFIEESTWAVRDEVRQLHAAQRALVTPFESVLHLAEQPELCKGPLCGSIEGVLLCVIQLGTFIGYYETSRNEYAFESAHTYLTGLGLGLLTSTAVSLSPTLADLPLAGAEVVRVAFRLGVLVADVSQNLEPADAAGDRGSWAYVIPNITPSEAEEELTAIHKRENTPEASRIFISAISRTSVTISGPPARLKRLFRLSDFFRDRTFIALPVYGGLCHAKHIYSSQHARSVVQGRSIAALDTRFIGRYPILSTGSGEPFPTATTATELFEHVITEILTQAIEWENVIQGVVERAKLLSVSEVEVQVFRISLPVHDLLSALQTSIREGVEVTIKDLDPWITKAIDDEQ…
Eurotiomycetes	Aspergillus_lentulus_PK20_01_GCA_023625555.1	SAT-KS-AT-PT-xCP	MAKPRAQTVWFGNEFPSDDLKDLFRRLHQHSKDRRFRLLSVFLDESTAILKEEVANLPQQLQELVPHFDTACTLAEVDFRQGALGAAMESALLTILELGMLIGNYEAEDIEWDLDPSETLLAGLSIGILAGAAVALSSSLADVAKVGAESVRVSFRLGVYVADISTKLEAPQSDGTLQSWAHVVTGMSHEAVQEELSQFNAVTQNPELTKVFVSAADKTSVSVSGPPSRVKAAFQHSPSLRYSKSFPLPVYDGLCHAPHLYSLDDIEFVINSAKSVIPSSRPVRLPLISSQTGKPFAAKTAGELFLEIGTELLTGTIYVDNVTTGILEHVKLKEPTGSYRIDSFRMSQVLNGILTAIETDFPALERVRRDFVSWVYGDYGARRPSSYAASKLAIVGMAC…
Eurotiomycetes	Aspergillus_lentulus_PK20_01_GCA_023625555.1	SAT-KS-AT-PT-xCP-xCP-Red	MADHLELFLFGDQTYNPQPYLREMMRNRHNPALKNFLSRSYDAIREELYSLPHEVRADMPRFTCLDDLILWKQDGRQCIPLDMALTCMYQLGAFISKTESGRYPAQDSAVLGICTGALAAAAVSCSRSTLELIPIAVDAVVLAFRTGKLVANITRTLEPLHAPVQSWSIFIRGLTSAEAVREFCEQTVLPLTRQPYISAFTPNGITVSGPPSSLTQMTVSSTFKDFRFDSISIYGPYHATHLYSQNDVEAIVGSLAPRGSVPRRHMLLLSSTETSVKAGGLDAIWRAAVEQILLQPICWSSIFDQLQATHRKVSPKTIRITPIGTKADQLIHTALKQTPLCESLTMPEKSLKAEPQTPYSNPGKPKLAIVGMSGRFPGANDNEAFWDLLYQGLDVHKPV…
Eurotiomycetes	Aspergillus_lentulus_PK20_01_GCA_023625555.1	SAT-KS-AT-PT-xCP-xCP-Te	MEDLRRIYLFGDQTISCDEGLRNLLQAKNHTIVASFIERCFHALRQEITRLPPSQRTLFPRFTSIADLLARHRESGTNPALGSALTCIYQLGCFIDYHGDRGHPYPSSDDGLLGSCTGMLSCAAVSSCKNVGELLPLAVEVVKLTIHLGLCVMRVREMVDSSESSSGSWSILVSEINEADAANLISSFAKKRVSTAYNRWKKILTYQGITPSSQPYISAVGSKGLTISAPPDILDKFIEEGLPKEYKHFKAPGVSGPYHAPHLYNDREIREILSFCSDDVISRHTPQVPLVSSNTGKLVQVKSMRDLLKVALEEILLRKICWDKVTESCLSIVHAANDKPWRILPIASNATQGLVTALQRMGNCQVEVDTGVGAPQMDPAAPNATGNASRSKIAIIGMS…
Eurotiomycetes	Aspergillus_lentulus_PK20_01_GCA_023625555.1	SAT-KS-AT-PT-xCP-xCP-Te	MAGPLKLYVFGDETGDFAEPLQRLCERRKEVLFLHFLEELNKVLRDEVRRQPRDVRLQIPEFTDVLDLVRHYRHSGSRNQILETTLTCVCQLATVISFFGNKTSQYFTPSDSVFAGFCTGLLSASSVATSQDTLQLITNALTTVRVAFRIGVKVNGAAQRLSKHADAAAARSWTTLIIGAQKEASIEALAQFNESKGIPKANQAYISANSEDVVSISGPPETVASLLQHSEYLQKFRTVSLDIFAPFHAPHLYSDDDVAEVLRPFSDKDEKRKLFIPVISGVGTRYSPDLDVDTLMVDVVRDILIRPLLFENVMNTVTETTTTSPRKDCQIFSVGPSQAINSLASTLRADTSLNVTTQGQLHTEKPDYEPLNGAQKIAIVGMAGRFPNSDNLESFWSTL…
Eurotiomycetes	Aspergillus_lentulus_PK20_01_GCA_023625555.1	SAT-KS-AT-PT-xCP-xCP-Te	MHRPLQVECLNLVVLGDQTNNVSALLKKLLLSAPYSVAQSEFIRDASEALRAQSERLRPFQREHLPGFQSIHDLARIYEKSKGVCHPSISSALVCVTQLLQIFRYFEGRGGRSENNEHIAVVGLCTGSLVAAAYATSASLDDLRLLAVPTVSMAFQMGLQAATASSMLHEQGNPLGSWSIAIPKMTEDEALSALKRYDAGGHLSLRHRCFVSAVGLKSVTISGSPPALGRFAESLTASQPSRKIVWLPIFAGYHASHIHTVLDFPSFLSRCGIDADLLCSFKSIKTLLSPLTGEPVDSNSALDLFKTVVHHTLQAPLRLDLIVDRCASLIRENTIASVRIDAVGPTPVADSLAAALRTRTSASVSTRELVVLEPGVDQYKPSAAFGQAPLAIVGMSGRF…
Eurotiomycetes	Aspergillus_lentulus_PK20_01_GCA_023625555.1	SAT-KS-AT-xCP-MT-Red	MTTHPRQKPKVFLFGPQALALDVKFFHQLHLSLHADQHAKWALSIVSELLQVWESLIQKVPKLQHLNGAQLLRDLNQGLQTGEISPSLFPLPNILLSPLVVIAQLTQYVNLLTAALPNLGETDEFPASVTETAETLGLCTGILSAFAVSSSSSLAQLYKNGAVAVRLAMLAGALVDAEQISPDSDRVATSVSVSWNGVESSATLSRVLKECPEAYISVHVDEKRSTVTVSQREAANLVQQMKDSGLHVVGVALSGRFHWSGHAADAERLIAFCSSHAEFQFPDHSEMILPSILSSGGSLHETALREILLKPSQWLENFTRVYSSHLEAGGATFICFGAERCTPPTMTRKLGSQLVQLSDINLSTSPLPAQLLGQSLDELPDDQVAVIGMACLVPGAEDL…
Eurotiomycetes	Aspergillus_lentulus_PK20_01_GCA_023625555.1	SAT-KS-AT-xCP-xCP	MASTLPSTVVCGSQTPPPSRDCLQRVQSNLKDSKLKELAKAVDDLPQFWSHLVEVKPVLSQVNDEPLKKLKDWAKDESLEIPEGLPNILLAPLTVIIHLLQYLRFAHSLDADDSQGDRHQRVLQSTCKGGFQGLCIGFLSAAALACSRTERDIWCNASVALRLATCVGAYVDLDELTYDSADVHSCMIIHWEDNSGKDRVTEVLKGYPGVYTSVELDDKSITVTAKESQVLSLRSDLAARDAKLTKIPIHGRYHSRKHAEILQDLLEICNNEESLRFPIINRPLVPLRNNTTGDLITSAEKLHELALKCVLTEPADWYSTMAETVSNLISQPETTEQPLILELGLVSCLPLSLTASANLRVLTPPLTSTISPNEQESSVNDEYRYDYPEHSIAVIGAAC…
Eurotiomycetes	Aspergillus_luchuensis_CBS_106.47_CBS_106.47_GCA_001890685.1	A-xCP-KS-AT-KR-xCP-Red	MGDMDGTISNEDYLTIIEQFNATEDATTLGFCLPELFEKVAERYPNNIAVIYGDTQLAYGTLNRLANQLARILVEERGVGRGDVVGVALDRSIDLIVAVLAVVKAGAAYVPIDPAFPADRVTHMVNDAGPKLVVVSDSTVTALSPWRDICLSIDTVRGNMEQVDSSNLTTQNVRPENLAYVIYTSGSTGRPKGVEANHGALCNLLLSMQKEPGCAPGDRLLAVATISFDMSILDLLLPLASGAATVIAPTEALRDPGALLKLMERHSVTMIQATPSFWQMLLDGGWKGQPRLVKILTAGEPISRRLLDRLLAYGDMVWNGYGPTEATVYASVGRVSQDEQDIVIGHPIANFQLYVLNPKDLTPMPIGGLGEVYIGGCGVNCGYRNKPGMTKERFLDNNP…
Eurotiomycetes	Aspergillus_luchuensis_CBS_106.47_CBS_106.47_GCA_001890685.1	KR-KS-AT-DH-xCP-xCP-MT-Te	MANDDLIHKLTWSTAALSKEPLSIAHVVFVVADKESESLSAYQTQLVNEGITTVVTDDAMKIDPLITPGTIVVYIPPTAKRKNEIYAAANQACTGLISLAQQLHHRIISAKSETVKLFTIVPLDRGIGDLVYSPLHGLSRVLKTEIPEIFGGLFEDDRGAFPLSAVKYAQGFDVVRVCEGEARVAYLQPFTDEPSDKKGLQLHANSSYLITGGTGGIGLATATWLAQRGARNIVLVSRRGLPPSSDSKPVEANSADPISRIAKLKAVGVSVHVLAVDISKPNADVTLSQAINDLGIPPIKGVIHAAGTAGYHTLTRCTPTDIADNLAPKDSGLLRVHFFSRTACRIPGQLAYAPSNAFLDALAAHRRRQGDNSMAILWTGWQGTGVWDQNKAAMRRLNK…
Eurotiomycetes	Aspergillus_luchuensis_CBS_106.47_CBS_106.47_GCA_001890685.1	SAT-KS-AT-PT-xCP	MSAPTKLVFFGNEFPNDDLKTLFRGLHRHGKDRRFRQLATFLEESTRVLQSEVAQLPEPLKKLVPHFENLMPLTEVDFRQGPLGAAMESALLTILELGMFIGHYEAEERVWDLSADRTTLAGLSIGLLAAAGVALSTHLAEVVQNGAECVRVSFRLGVYVHDISRKLEAPQADGSLLSWAHVVTGETASDLQEELSRYNTETGTPELLKVFISAADKTSVSVSGPPSRIRAAFRASQRLRYSKSLALPVYDGLCHAAHLYDEETIHRVLHPDGSVIPTSRPVQLALLSSRSGQPFEATTAAELFRAISTELLTGTIFLDNITAGILDRTERCADATQCQIETYRTSLVFKGLLKALEACFPDRTIKTTDLIPWVFQDYGARQPKSHADSKLAIVGMACR…
Eurotiomycetes	Aspergillus_luchuensis_CBS_106.47_CBS_106.47_GCA_001890685.1	SAT-KS-AT-PT-xCP	MRVVFFSNKFPGVDLRDLSQRLRFVSRSRSHGLLRRFLEEATMVAHEEIRRLPPELKTLIPPFQSILDLVDSFDWHGGPLTGVFECAFTCLFHISLFLGSYERNPQEFNFSNSTFTGLGLGLLAATGIVASQTLLDVPRTSAEAVRIAMRTGYLLYQKQQEIEPQEPDAPPKSWSVILKNMDQATVQETLDHFNASIDVSITGKLYISVIEPDGSLFVNGPPSILAKIFGKTGKLASARHAALPVYGGPCHAAHLYDRADSAHIAETVSPQIANRRVPSNVCLLSMVDGKPLGSQTVLELFESAIYCLLTGTIQWGNVAEAIFSSPDWNEEAHVRLESIFQPCPVVNTLISRAQATYPHCTVDTREHMQWVFMEENKPTNPSSTDIAVVGMSCRLPGGA…
Eurotiomycetes	Aspergillus_luchuensis_CBS_106.47_CBS_106.47_GCA_001890685.1	SAT-KS-AT-PT-xCP-xCP-Te	MSKMETVAEVFIFGDQTVAFESTLHSLLHVKDNAVLTDFFDRVGYQLRRHVGNLPLHQQEWFPYFTTLIDLLAQHENCHAAPALKLPLLCATELGQFIRHYGQAGRTYPAPESTFLIGACTGAFAAAAVATAQTLAELVPAAVEAVTVAFRTALRSLILRNDLELTIDGPQKSWSAIVGASEPEAANAIRCFNVEKGLPPVARLYLSSVSRTNVSISGPPRLLGQFLLSCAWKHSLLPIELPYHASHLSRKDDAEIIVGDFHDFSLLKYTQRTKVICVVSGEVVVASDLRSLLHRAVQEALCEPLQWNCITASLSQELKQGQFTECVINQVSSRSGSLISSALLQEAFLGVKIVQSIGDVAVSPALSSPTGKFSQSSIAIIGFSGRFPESGSNEEFWEM…
Eurotiomycetes	Aspergillus_luchuensis_CBS_106.47_CBS_106.47_GCA_001890685.1	SAT-KS-AT-PT-xCP-xCP-Te	MEGPSRVYLFGDQTSDIEAGLRRLLQAKNSTIVQSFFQQCFHAIRQEIAKLPPSQRKLFPRFTSIVDLLSRSRESGPSPVLESALTCIYQLGCFIHFYGDLGHDYPTPSNSHLVGLCTGVLSCTAVSCARNVGELIPVAVEAIVIALRLGICVFRVRELVASADSESTCWSALVSGISEAEAGRLIDEYSSKKATPPSSKPYISAVSANGVTVSAPPTVLDEFVETCISKNYKPVKAPIHGPYHAPHLYDDKDIERILQQSSALEELTSWSPAIPVISSNTGKPIKAKSLKDLFKVALEEILLRRLCWDKVTESCTSVCKTGTNHSCKLFPISSSATQSLFTVLKKAGVSVSLETGVGEIAMNPETRNLTGKAENSKIAIIGMSGRFPESDGTEAFWDL…
Eurotiomycetes	Aspergillus_luchuensis_IFO_4308_GCA_016861625.1	KR-KS-AT-DH-xCP-xCP-MT-Te	MANDDLIHKLTWSPAALSKEPLSIAHVVFVVADKESESLSVYQRQLVNEGITTFVTDDAMKIDPLITPGTIVVYIPPTAKSKNEIYAAASQACTGLISVAQQLNHRIISAKSETVKLFSIVPLDRGIGDLVYAPLQGLSRVLKTEIPEIFGGLFEDDRGVFPLSAVKYAQGFDVVRVCEGEARVAYLQPFTDDEPSDKKGLQLHANSSYLITGGTGGIGLATATWLAQRGARNIVLVSRRGLPPSTDSKPVEANSADPISRIAKLKAVGILVHVLAVDISKPNADVTLSQAINDLGIPPIKGVIHAAGTAGYHTLTRCTPTDIADNLAPKVIGSLNLDSLFPPRTLDFFVFTSSVGQLVGFPGQLAYAPSNAFLDALAAHRRRQGDNSMAILWTGWQGT…
Eurotiomycetes	Aspergillus_luchuensis_IFO_4308_GCA_016861625.1	SAT-KS-AT-PT-xCP	MRVVFFSNKFPGVDLRDLSQRLRFVSRSRSHGLLRRFLEEATMVAHEEIRRLPPELKTLIPPFQSILDLVDSFDWHGGPLTGVFECAFTCLFHISLFLGSYERNPQEFNFSNSTFTGLGLGLLAATGIVASQTLLDVPQTSAEAVRIAMRTGYLLYQKQQEIEPQEPDAPPKSWSVILKNMDQATVQETLDHFNASIDVSITGKLYISVIEPDGSLFVNGPPSILAKIFGKTGKLASARHAALPVYGGPCHAAHLYDRADSAHVAETVSPKIANRRVPSNVCLLSMVDGKPLGSQTVLELFESAIYCLLTGTIQWGNVAEAIFSSPDWNEEAHVRLESIFQPCPVVNTLISRAQATYPHCTVDTREHMQWVFMEENKPTNPSSTDIAVVGMSCRLPGGA…
Eurotiomycetes	Aspergillus_luchuensis_IFO_4308_GCA_016861625.1	SAT-KS-AT-PT-xCP	MSAPTKLVFFGNEFPNDDLKTLFRGLHRHGKDRRFRQLATFLEESTRVLQNEVAQLPEPLKKLVPHFENLMPLTEVDFRQGPLGAAMESALLTILELGMFIGHYEAEERVWDLSADRTTLAGLSIGLLAAAGVALSTHLAEVVQNGAECVRVSFRLGVYVHDISRKLEAPQADGSLLSWAHVVTGETASDLQEELSRYNTETGTPELLKVFISAADKTSVSVSGPPSRIRAAFRASQRLRYSKSLALPVYDGLCHAAHLYDEETIHRVLHPSGSVIPTSRPVQLALLSSRSGQPFEATTAAELFRAISTELLTGTIFLDNITAGILDRTERCADATQCQIETYRTSLLFKGLLKALEACFPDRTIGTTDLIPWVFQDYGARQPKSCADSKLAIVGMACR…
Eurotiomycetes	Aspergillus_luchuensis_IFO_4308_GCA_016861625.1	SAT-KS-AT-PT-xCP-xCP-Te	MEGPSRVYLFGDQTSDIEAGLRRLLQAKNSTIVQSFFQQCFHAIRQEIAKLPPSQRKLFPRFTSIVDLLSRSRESGPSPVLESALTCIYQLGCFIHFYGDLGHDYPTPSNSHLVGLCTGVLSCTAVSCARNVGELIPVAVEAIVIALRLGICVFRVRELVASADSESTCWSALVSGISEAEAGRLIDEYSSKKATPPSSKPYISAVSANGVTVSAPPTVLDEFVETCISKNYKPVKAPIHGPYHAPHLYDDKDIERILQQSSALEELTSWSPAIPVISSNTGKPIKAKSLKDLFKVALEEILLRRLCWDKVTESCTSVCKTGTNHSCKLFPISSSATQSLFTVLKKAGVSVSLETGVGEIAMNPETRNLTGKAENSKIAIIGMSGRFPESDGTEAFWDL…
Eurotiomycetes	Aspergillus_luchuensis_IFO_4308_GCA_016861625.1	SAT-KS-AT-PT-xCP-xCP-Te	MSKMETVAEVFIFGDQTVAFESTLHSLLHVKDNAVLTDFFDRVGYQLRRHVGNLPLHQQEWFPYFTTLIDLLAQHENCHAAPALKLPLLCATELGQFIRHYGQAGRTYPAPESTFLIGACTGAFAAAAVATAQTLAELVPAAVEAVTVAFRTALRSLILRNDLELTIDGPQKSWSAIVGASEPEAANAIRCFNVEKGLPPVARLYLSSVSRTNVSISGPPRLLGQFLLSCAWKHSLLPIELPYHASHLFRKDDAEIIVGDFHDFSLLKYTQRTKVICAVSGEVVVASDLRSLLHRAVQEALCEPLQWNCITASLSQELKQGQFTECVINQVSSRSGSLISSVLLQEAFLGVKIVQSIGDVAVSPALSSPTGKFSQSSIAIIGFSGRFPESGSNEEFWEM…
Eurotiomycetes	Aspergillus_melleus_CBS_546.65_GCA_016097325.1	KR-KS-AT-DH-xCP-xCP-Te	MTSTHQFHRIHWTPGPLSPEPLEFTKVVFVVEESQCESHQLATYRNQLSNLGYTTAVITNPEELNAELTEKTPSIVVHIPYAADGRENVYSAAVASCASLIAIAQVLVSSQPSQASGTETAKGADSVKLFSLVKNHDGISQLGYAPLHGLARVLKMEIPDLFGGLVEVKEEGLRFPLSAITSARGFDIIRVCEDEEEGRPQTAALQPVLLPDGEEKQRQAMALDSESTYLITGGTSGIGLETASWMVEQGARHLILLSRRGVESEARDIRANTLLARIAEMEAFGAKVHVLAIDLSLLGADSTLRQAISKLHAPAVKGVVHAAGTAGYHTLKGCTRADIENVFAPKVRGALSLDAVFPPATLDFFLLVSSIGQLVGFPGQLSYAPANAFLDGLAVQRRR…
Eurotiomycetes	Aspergillus_melleus_CBS_546.65_GCA_016097325.1	SAT-KS-AT-PT-xCP-xCP-Te	MQANVFVFGDQTVPFESTLHDLLQVKNNPILIDFLEKAGYYLRRYVASLPVYQQDWFPCFTTLVDLFAQHDQSHACPALKFAFVVTTQIGLFIKHFGDGASPYPTDNAYVIGACTGCFAAAAISTSRTLTELVPAAVEAVLVALQTAVRALTLRDDLTSLDEEHRAWSAVVAVDESVAEKLVQRFNAEKTLPRVMQLGGDAGGFGFHHPSLQGYAQRLPIVSAASGVILESQRFEDLLHGAVTETLTHPIQWNRVVSSLSRELSVHDFTDCTLYCVQDRGSFLASSLAQQLPSLTVTTTSINEGNLPPPPENEPTGRFSDSKVAIIGYSGRFPDSASNEEFWSLLLAGRDAHRTIPEDRFDWEEHYDATGKKKNTSRIKYGCFIKEPGVFDARFFNMSA…
Eurotiomycetes	Aspergillus_melleus_CBS_546.65_GCA_016097325.1	SAT-KS-AT-PT-xCP-xCP-Te	MVDQLHVYLFGDQTFEVSTKLPPLLHCKTSPLLEAFFEQAYHALRSEIAQLPARDRDTYPRFSSIAELLAWRNRQERLHQPIETTLTCIYQLAQFISEHDGFGRAYPFPKETCVSGLCTGALAAAAVSCCNTVSELLPVAVQTVVVALRTGLCALNAAKAVDQSEENWSIVLVGLSQQEVSDRLQEFSHSHRLPITSQPYVSAYAENWLTISGPPRILGLLRDLENFTTAHPRTIPVFAPYHAPHLFTKEDIKAILLTTPEGVWGRYSAVLPVVSSTTGQLIEGDNLRRRLEAALVQILLEPVQWHQLTQGVASVLSSSGASQFTISPVGTNADTALGVALNSTAGLSNGAIPERVPRTTHIEADHTKPIGSTGGSKIAIIGMSGRYPSAENNEEFWDL…
Eurotiomycetes	Aspergillus_melleus_CBS_546.65_GCA_016097325.1	SAT-KS-AT-PT-xCP-xCP-Te	MERSGTILFFGDTSTPVTSALLQLLESERKDTLLSKFLTLSRTVLRDGIEQLPFHVRQEARRFAELYDFTDPQHAKLASLRVLSPALLVITQLGQFISWYETHPHVDYPSAQSSVYIGLCVGQISAAAIGLSTNLIELIPLAVEAVRLTVNLGSLVFTVRDDLEYDADGAAWALMVENEIINKQLLELSSEALGLPSRKQPYVSARFENTTTIQGPPTTLARLKQFLASAKISTTNLSGRPVAIYAPYHASHLYTEADVLKPIESSASIQTVYNTETWSKDQPAILSTSSGSIIPLKSRQGLLSAVLSDVLVHPIEWSSIINGAISSVLSLGRTKWETQCFGPLHSQKLLVAAISSGAGVEVTLADTSIQAQKGHGRNTANTPIAIVGMAGRFPDADSV…
Eurotiomycetes	Aspergillus_melleus_CBS_546.65_GCA_016097325.1	SAT-KS-AT-xCP-MT-Red	MSSKLSPPKGNKTVLVFGCQCLTFSAEDFLALRETISSSPEYAWALEVLAELPVYYRTATHHLPKLTTIPGDRQLRSLHEWFRRGDIAGETFPPPYIQLAPLLMLTHFTQFEQYMRLTSPGYRDHGRIHAEESEVGEIVGFCIGFLSAAVASAADSRERFAEYASVAVRLSMLLGAIGDAQEVEEEWTSLATVWKGEDMEGELEEVLKRFPEAYVTVRYDDNRATIMTPRRNLAQLQESLQSASFGCSQVDFNGRYHWSGHKDTVRSLLAMCSTDPSLQLPDASQLVLPTRANTGGQPVASGPLTTLVLESILSQQCDWQRTFSAVYESQLKISDSIIVEFGQERCVPPTFMRNLRGRVIHFADLDLDLTSRLSPLNCNPRTYDTDIAVIGMACRVAGA…
Eurotiomycetes	Aspergillus_micronesiensis_H39_GCA_039763685.1	A-Red-KS-AT-DH-xCP-MT	MALLQDIISFVTLNPIALGTIPLLLYVISLLQSYLRLSHIPGPFLARWTNIPRFSWVLSFKAHDTHTALHRKYGPLVRFGPNMVSVGDPKESDFYHALLMKPRGKPIPGIFAAQDENIHRALKKAHLGRLLYEHPALLESRFMEKKAPLDFGKWLQMFAFDVIGELTFSRRLGFLESGEDINHVMANIWETFKKTSLVTQMPWLDKLWTNNPIQRWRRGGGASPGAAFAMARVEERRELQRTTNKNDWHFNTRDFLSRFMEAEAKDSSIPPYALAAWASSNITAGSDTTGIFLRTIFYQLLAHPETLRKLREELDQAAAAGNLDDLASWKQARELPYLDAVIKEGGRIHPPFGLPYERVVPPQGATICGKFIPGGTLVGMSAWVVHRDRELYGEDCDEW…
Eurotiomycetes	Aspergillus_minisclerotigenes_MRI390_GCA_028505775.1	KR-KS-AT-xCP-xCP-MT-Te	MTINEMIHRLDWTSAELSTEPLNFRKVVFLAADEDSRERLSRYQAQLADEGLTTVLIGHATEITPLLTPDTIVVHIPHVAREKSGVYEAVTKSCTSLIAAAQVLYHHTQDSRDRTSRLFSFISRDSGTDGLEYAPLYGLARVMKTEMGEGFGGLFDGDQGHFPLSAFKYAQGFDVVKICQGVPQTASLQPFQDQLNDQKQLQLREDSTYLITGGTRGIGLEIATWLGERGARSLLLVSRGGLTPALGRNAKNADHEKLVSRIARLKDMGISVHVLSIDFGKSEAETLLRQAIDELNIPRIKGVVHAAGVAGFHTLQHCSPSDVADVLAPKVRGSLALDTLFPPGTLDFFFFMSSIGQLIGFPGQLSYAPANGFMDGLAAHRRRHGDNSMSILWTAWRGV…
Eurotiomycetes	Aspergillus_minisclerotigenes_MRI390_GCA_028505775.1	SAT-KS-AT-PT-xCP	MRIFHFSNKFPPDDLADLFRRLRLQSRCPNHVILARVLEEVTDVVREEITELPAELRSLLPPFQSILDLAESFNWHQGPLSGTFECVFLVLVPVCLFVGHYESRPDEFVFRRDTSLFTGLGLGFLAATAIVASPSLCSVPVTMAEVVRMAMRTGLLIYQRSQDLEPQSLDGSLESWASIVKGMGEIAVREGIDEYNSSTDTPQPSSIYISVVEPDGSVFINGPPSRLRKFFSTSGKVQSAAHAPLPVYGGPCHAPHLYDHSHSSWVVKKCRAEVSSRDLSHAAYLLSMADGNPLKADTVLELFESATYILLTSIICWGDVVNAITASSSLWEKGMKLHVEMLRPSPVVDGLVSAIQKSHPGCSAYVVDLGEWIFDDTHISPHGAHEKIAVVGMSCRLPG…
Eurotiomycetes	Aspergillus_minisclerotigenes_MRI390_GCA_028505775.1	SAT-KS-AT-PT-xCP	MIENSTITPSESRSPSPSHANVDMDANIPEEFILFSHELPSGEIQDLIRRLHRYSMLPGYPHLARFLQNCALVLRTEVQKLPRLLRDSVPPFHDVVTLASHWDDFKSSSLSGAWDGVFLCIYEIAMLIGHHETLDTSYRRPACLVGISVGLFSAAAVAVSESLSDLVSYGAESVRTAFAFCVHVQRVSQTLEPTVTEQATSVSWATVVIGVPVEIIREELDCFNHLAELERTGTNAMPLTGVSISHVDNTSVGITGPPTRLKQLFRESDILRSSRHSALPISGGLCHIPNIYDDDDVRAILETALVRERWGTRATQVPLISPFTGSPFQCSNAYHLIKAICTEALTKPLYFDKVASGVVTQLSRGQRPNMQSCQILHYRASVMSETIVADVAEELSTCD…
Eurotiomycetes	Aspergillus_minisclerotigenes_MRI390_GCA_028505775.1	SAT-KS-AT-PT-xCP-Te	MAQSRQLFLFGDQTADFVPKLRSLLSVQDSPILAAFLDQSHYVVRAQMLQSMNTVDHKLARTADLRQMVQKYVDGKLTPAFRTALVCLCQLGCFIREYEESGNMYPQPSDSYVLGFCMGSLAAVAVSCSRSLSELLPIAVQTVLIAFRLGLCALEMRDRVDGCSDDRGDPWSTIVWGLDPQQARDQIEVFCQTTNVPQTRRPWISCISKNAITLSGSPSTLRAFCAMPQMAQHRTAPIPICLPAHNGALFTQADITTILDTTPTTPWEQLPGQIPYISHVTGNVVQTTNYRDLIEVALSETLLEQVRLDLVETGLPRLLQSRQVKSVTIVPFLTRMNETMSNILPVSFISTETRTDTGRAIPASGRPGAGKCKLAIVSMSGRFPESPTTESFWDLLYKG…
Eurotiomycetes	Aspergillus_minisclerotigenes_MRI390_GCA_028505775.1	SAT-KS-AT-PT-xCP-Te	MHQIPVFAGLGSDALFSERTLGTAAEDARTSEGQIILRACHDIFVKEITSVIHSQRLPSDIKLEDFVEPESLIRPRACYQRNSIIQHVSLYTIQLLRYLRYSTEKPGVILGVAGFCAGLLPGAALATSRNTIELLSRGQDFFYVALHVGIRIESYKQVMMGKEACPPHLPCSLVVDGITAQHARELLEEHNRRSPGSYIYLSAINSDTCVTLSGRGDHLQQFSQSSVPSQCKIRPTNIFSLYHGRHQLEGVRRDILRDLRNNILLFSTPVHLIAPLFSNIDGKPIDSGQLATLEELCEKLLEMMILEPVDWVAVEDNVLAAIKQPATAVDASFEILNFGPGYGISGARYTLPDNVNIVAASIAEPRPSLQDASEILSSNDIAIVGMGVDLPGAPNTDAL…
Eurotiomycetes	Aspergillus_minisclerotigenes_MRI390_GCA_028505775.1	SAT-KS-AT-PT-xCP-Te	MVIEEREQIIVFGDLTCDSVAGLRTLVTIKDNPLLISFFERVTSGLREDIGLLPFSQRQRFIRFTTFEELLARVQRSTCPHPALEKALACTYQLACFISERNRQYTSPGHKYPSTRQTCLVGLCTGLLSAAAVGCCQSITDLLPLATHTVLIAFRAGLFVADVRDRLEPQTGVPLAWSVLIPGLDGDAASLTLQRYNEEKGLPVTSAPYISTYANTGVTLSGLPSALNDLLDSSCLPKNRALTIPIYAPYHASHLYGQKDIENILRKASATKFASYQCQFSILSSITGQSIQADTFGALIDYALNAILREPLRLDRIVSSLGEALLSDSSIRGCTILPIATVIGQSLAAALRKHGTPDITVDPCMNSSIAVRDDRTSTTGHLGHSKLAIIGYSGRFPDA…
Eurotiomycetes	Aspergillus_minisclerotigenes_MRI390_GCA_028505775.1	SAT-KS-AT-PT-xCP-xCP-Te	MVNIYIFGDQTVRVDDAVHKLLHVKNNPILKSFLDGSFAAIRKQIFLLPANERTSLPDAHTLPLLLDAVRRGRRHGALESALVCLCEIGQYIALLQTTDLCHPPTGSILVGFCTGSLAAAAVSCARTSIDLLTLGIEAVVVAFRVGMHVARRANALGGDGGSQWKPWSLAVTDVSESETEKILEEFTKDEVSGVHVANWHDAHILAKGLPVIMKPYVSAAGSNTLTISGTPRVLEALKASPHLRGTKSLPVSIYAPYHAAHLYNEADVESIFACKPVESALFHSELRTPLISCATGTVLKEKTFGDLLQALVMEILTCQIRFDKVEESIVQHTPSATAQIIPIHTNIAPRMKTSLTQVGLQVECFKAIANQEPVSEALSESPSNDSSKIAIIGFSGRFP…
Eurotiomycetes	Aspergillus_minisclerotigenes_MRI390_GCA_028505775.1	SAT-KS-AT-PT-xCP-xCP-Te	MEGPRGVYLFGDQTSDFDAGLRRLLQVKNNTIVASFFQRCFHALRQEIARLPPSERKIFPRFTSIVDLLARHRESDPNPALESALTCIYQLGCFINYYGDLGNVYPSASDCHIVGLCAGLLSSAAVSCSTNVGELLPAAVEAVVVALRLGLCVLKVRELVGSDQASSTSWSVLISGISEKDASQLIGEFTAERAIPPSSKPYISAVGYNSITISAPPKVLDDLIDSRLSKSHKPVRAQIHGPYHAAHLYDGRDVDRIIESCHNEVVSNYTPRIPVLSSTTGQPIEAKHMKDLLKAALEEILLRQLCWEKVTDACSSILKTARHQPCKLFPISSTATQSLFTALTKAGITDIEVENGLGDVPTNPKDNLNISGRADCSKIAIIGMSGRFPEADGTESFWD…
Eurotiomycetes	Aspergillus_minisclerotigenes_MRI390_GCA_028505775.1	SAT-KS-AT-xCP-MT-Red	MVTTQSISRQRPGSACEECRRRKVRCDRRRPQCQVCFETGIDCKISTTRLPRGPRKGQLRTLRTRIAALERCLADQHPGINQQMAGLFDGSGVECDSEEDPLRDRATLPQQVPEICSDDQQGGGSPRSPDPQTRPCGLVSDLMRADLDQLYFDRVHPSAPILQRWRYQVWAKQPRKSEAQVCLQYAMWTVAASLSAHFQSLRDTLYHETRRMLDAIDLRSPISGILAVEQAQAWVLVAIYEYMQLSPQQAWMSAGRCCRLVLGMRLYEIDDPNSPVTMAREHEPNLVDWAGLEEQRRTFWMAYSLDRFISFHNALPYTLNEELIATRLPTSEEDFQAGHPAATQFLPEVMAGYSSSDSSNVQSSFSQCVILATLCGRALSHKQKSAMEQINGELGDGLW…
Eurotiomycetes	Aspergillus_minisclerotigenes_MRI400_GCA_028505865.1	KR-KS-AT-DH-xCP-xCP-MT-Te	MTINEMIHRLDWTSAELSTEPLNFRKVVFLAADEDSRERLSRYQAQLADEGLTTVLIGHATEITPLLTPDTIVVHIPHVAREKSGVYEAVTKSCTSLIAAAQVLYHHTQDSRDRTSRLFSFISRDSGTDGLEYAPLYGLARVMKTEIGEGFGGLFDGDQGHFPLSAFKYAQGFDVVKICQGVPQTASLQPFQDQLNDQKQLQLREDSTYLITGGTRGIGLEIATWLGERGARSLLLVSRGGLTPALGRNAKNADHERLVSRIAKLKDMGISVHVLSIDFGKPEAETLLRQAIDELNIPRIKGVVHAAGVAGFHTLQHCSPSDVADVLAPKVRGSLALDTLFPPGTLDFFFFMSSIGQLIGFPGQLSYAPANGFMDGLAAHRRRHGDNSMSILWTAWRGV…
Eurotiomycetes	Aspergillus_minisclerotigenes_MRI400_GCA_028505865.1	SAT-KS-AT-PT-xCP	MIENSTITPSESRSPSPSHANVDMDANIPEEFILFSHELPSGEIQDLIRRLHRYSMLPGYPHLARFLQNCALVLRTEVQKLPRLLRDSVPPFHDVVTLASHWDDFKSSSLSGAWDGVFLCIYEIAMLIGHHETLDTSYRRPACLVGISVGLFSAAAVAVSESLSDLVSYGAESVRTAFAFCVHVQRVSQTLEPTVTEQATSVSWATVVIGVPVEIIREELDCFNHLAELERTGTNAMPLTGVSISHVDNTSVGITGPPTRLKQLFRESDILRSSRHSALPISGGLCHIPNIYDDDDVRAILETALVRERWGTRATQVPLISPFTGSPFQCSNAYHLIKAICTEALTKPLYFDKVASGVVTQLSRGQRPNMQSCQILHYRASVMSETIVADVAEELSTCD…
Eurotiomycetes	Aspergillus_minisclerotigenes_MRI400_GCA_028505865.1	SAT-KS-AT-PT-xCP	MRIFHFSNKFPPDDLADLFRRLRLHSRCPNHVILARMLEEVTDVVREEITELPAELRSLLPPFQSILDLAESFNWHQGPLSGTFECVFLVLVPVCLFVGHYESQPDEFVFRRDTSLFTGLGLGFLAATAIVASPSLCSVPVTMAEVVRMAMRTGLLIYQRSQDLEPQSLDGSLDSWASIVKGMGEIAVREGIDEYNSSTDTPQPSSIYISVVEPDGSVFINGPPSRLRKFFSTSGKLQSAAHGPLPVYGGPCHAPHLYDHSHSSWVVKKCRAEVSTRDLSHAAYLLSMADGNPLKADTVLELFESATYILLTSIIRWGDVVNAITASSPLWEKDMKLQVEMLRPSPVVDGLVSAIQKSHPGCSTYVVDLGEWIFDDTHISPHGAHEKIAVVGMSCRLPG…
Eurotiomycetes	Aspergillus_minisclerotigenes_MRI400_GCA_028505865.1	SAT-KS-AT-PT-xCP-Te	MAQSRQLFLFGDQTADFVPKLRSLLSVQDSPILAAFLDQSHYVVRAQMLQSLNTVDHKLARTADLRQMVQKYVDGKLTPAFRTALVCLCQLGCFIREYEESGNMYPQPSDSYVLGFCMGSLAAVAVSCSRSLSELLPIAVQTVLIAFRLGLCALEMRDRVDGCSDDRGDPWSTIVWGLDPQQARDQIEVFCQTTNVPQTRRPWISCISKNAITLSGSPSTLRAFCAMPQMAQHRTAPIPICLPAHNGALFTQADITTILDTTPTTPWEQLPGQIPYISHVTGNVVQTTNYRDLIEVALSETLLEQVRLDLVETGLPRLLQSRQVKSVTIVPFLTRMNETMSNILPVSFISTETRTDTGRAIPASGRPGAGKCKLAIVSMSGRFPESPTTESFWDLLYKG…
Eurotiomycetes	Aspergillus_minisclerotigenes_MRI400_GCA_028505865.1	SAT-KS-AT-PT-xCP-Te	MVIEERKQIIVFGDLTCDSVAGLRTLVTFKDNPLLISFFERVTSGLREDIGLLPFSQRQRFIQFTTFEELLARVQRSTCPHPALEKALACTYQLACFIRQYTSPGHKYPSTRQTCLVGLCTGLLSAAAVGCCQSITDLLPLATHTVLIAFRAGLFVADVRDRLEPQTGVPLAWSVLIPGLDGDAASLTLQRYNEEKGLPATSAPYISTYANTGVTLSGLPSALNDLVDSSCLPKNRALTIPIYAPYHASHLYGQKDIENILRKASATKFASYQCQFSILSSITGQSIQVDTFGALIDYALNAILREPLRLDRIVSSLGEALLSDSSIRGCTILPIATVIGQSLAAALRKHGTPDITVDPCMNSSIAVRDDRTSTTGHLGHSKLAIIGYSGRFPDANNNE…
Eurotiomycetes	Aspergillus_minisclerotigenes_MRI400_GCA_028505865.1	SAT-KS-AT-PT-xCP-xCP-Te	MVNIYIFGDQTVRVDDAVHKLLHVKNNPILKSFLDGSFAAIRKQIFLLPANERTSLPDAHTLPLLLDAVRRGRRHGALESALVCLCEIGQYIALLQTTDLCHPPTGSILVGFCTGSLAAAAVSCARTSIDLLTLGIEAVVVAFRVGMHVARRANALGGDGGSQWKPWSLAVTDVSESETEKILEEFTRDEVSGVHVANWHDAHILAKGLPVIMKPYVSAAGSNTLTISGTPRVLEALKASPHLRGTKSLPVSIYAPYHAAHLYNEADVESIFAYKPVESALFHSELRTPLISCATGTVLKEKTFGDLLRALVMQILTCQIRFDKVEECIVQHTPGATAQIIPIHTKIAPRMKTSLTQVGLQVECFKAIANQEPVSEALLESPSNDSSKIAIIGFSGRFP…
Eurotiomycetes	Aspergillus_minisclerotigenes_MRI400_GCA_028505865.1	SAT-KS-AT-PT-xCP-xCP-Te	MEGPRGVYLFGDQTSDFDAGLRRLLQVKNNTIVASFFQRCFHALRQEIARLPPSERKIFPRFTSIVDLLARHRESDPNPALESALTCIYQLGCFINYYGDLGNVYPSASDCHIVGLCAGLLSSAAVSCSTNVGELLPAAVEAVVVALRLGLCVLKIRELVGSDQASSTSWSVLISGISEKDASQLIGEFTAERAIPPSSKPYISAVGYNSITISAPPKVLDDLIDSRLSKSHKPVRAQIHGPYHAAHLYDGRDVDRIIESCHNEVVSNYTPRIPVLSSTTGQPIEAKHMKDLLKAALEEILLRQLCWEKVTDACSSILKTARHQPCKLFPISSTATQSLFTALTKAGITDIEVENGLGDVPTNPKDNLNISGRADCSKIAIIGMSGRFPEADGTESFWD…
Eurotiomycetes	Aspergillus_minisclerotigenes_MRI400_GCA_028505865.1	SAT-KS-AT-PT-xCP-xCP-Te	MHQIPVFAGLGSDALFSERTLGTAAEDARTSEGQIILRACHDIFVKEITSVIHSQRLPSDINLEDFVEPESLIRPRACYQRNSIIQHVSLYTIQLLRYLRYSTEKPGVILGVAGFCAGLLPGAALATSRNTIELLSRGQDFFYVALHVGIRIESYKQVMMGKEACPPHLPCSLVVDGITAQHARELLEEHNRRSPDSYIYLSAINSDTCVTLSGRGDHLQQFSQSSVPSQCKIRPTNIFSLYHGRHQLEGVRRDILQDLRNNILLFSTPVHLIAPLFSNIDGKPIDSGQLATLEELCEKLLEMMILEPVDWVAVEDNVLAAIKQPATAVDASFEILNFGPGYGISGARYTLPDNVNIVAASIAEPRPSLQDASGILSSNDIAIVGMGVDLPGAPNTDAL…
Eurotiomycetes	Aspergillus_minisclerotigenes_MRI400_GCA_028505865.1	SAT-KS-AT-xCP-MT-Red	MVTTQSISRQRPGSACEECRRRKVRCDRRRPQCQVCFETGIDCKISTTRLPRGPRKGQLRTLRTRIAALERCLADQHPGINQQMAGLFDGSGVECDSEEDPLRDRATLPQQVPEICSDDQQGGGSPRSPDPQTRPCGLVSDLMRADLDQLYFDRVHPSAPILQRWRYQVWAKQPRKSEAQVCLQYAMWTVAASLSAHFQSLRDTLYHETRRMLDAIDLRSPISGILAVEQAQAWVLVAIYEYMQLSPQQAWMSAGRCCRLVLGMRLYEIDDPNSPVTMAREHEPNLVDWAGLEEQRRTFWMAYSLDRFISFHNALPYTLNEELIATRLPTSEEDFQAGHPAATQFLPEVMAGYSSSDSSNVQSSFSQCVILATLCGRALSHKQKSAMEQINGELGDGLW…
Eurotiomycetes	Aspergillus_montevidensis_ZYD4_GCA_020826735.1	SAT-KS-AT-DH-xCP-xCP-MT	MEAPINDYPISLLFGPQSTITSESITQIRATILEDPALRFLHDVLKDLFLLWPSITKAWPALNSLSGETHLIELGSFFQKGGDLPAFSVTSNIIWAPLAVVSQIIRFWKTKDHIKCFHTSAGGPQLIDVQGFCIGSLTAAAAACSRDIEDFKNFSSKAVHLAVCIGAAVDFDALDTSFRGHSIAIRWRSDLEYQYLEYLLNHYHSAYISCVTDTDRVTVTVDEDILTTLMKAVADRGMSVRLLEVRGRYHHDCHESAVERIASLCECDHRFAFPDAQRLALPLRSTIDGAVITNGPLHTALLRAILTERSRWHLTVSAVLEDACSKNVHIQFIPIGAGSFVPPSVLRNEVSRPPTRPKIANGCAPANTSPIDPVLTPSDTSSEGAEGSKFPIAIIGMGC…
Eurotiomycetes	Aspergillus_montevidensis_ZYD4_GCA_020826735.1	SAT-KS-AT-PT-xCP-xCP-Te	MEGLRRVYLFGDQTGDFDAGLRRLLHAKNNSLVTAFFQRCFFALRQEITKLPPSQRQIFPRFTSIIDLLARYRESGVNPALESALTCIYELGCFINYYGDLGHAYPSGSDSAIIGLCTGLLPSTAVSCSKTVGELIPVAVETAVLALRLGLCVHSVRKLVDRGSSTSSSWSALVSGISEGEALDKIGEFSSQKAIPPSSQPYISAISANGVTISAPPSTLDQLIQASLSKDHKPVRAPIHGPYHAAHLYDARDVERVLESWPKDTFSSYVPQIPVLSSNTGSTIEAETIDTLLRASVDEILLRQLCWDKVTESCVSRLKETASSACTLVPVSSSAIQSLHTTLKKAGITNIDVNNALGDIPNEPNGYSTTGRSEHSKIAIIGYSGRFPEATDPEKFWDL…
Eurotiomycetes	Aspergillus_mulundensis_DSM_5745_GCA_003369625.1	ER-KS-AT-DH-MT-KR-xCP-Red	MEAPRVVISERALGGHAHAEQANGGPEDWRIAAPAQRVSVCTGQAPAVQVDCLLALMPVRLLSDRTLLVDADVKADVRPTYRQSYCISSHHAARPPALVAMSLPALQTALVQTPLASGIDLPLTINHETPIPKAPTEHHVLVRVLAVALNPNDHKMITHLNMPGGVAGCDFCGLVEPSPDGHTVPRFPAGTRVCGALFAYNPAHRNNGSFAQWLVADSRLLVKVPDAWTDFEAASLGVGWSTLCLAFSDPDALALEGLPTQPTHKTRDPVLVYGGGTASGTLACQLLTLMGYTPLAVASERSFALARSYGAAATASYTSKDCVGTIKSLTERPIRHVLDCITDIESVPICFSALARTGGRYACLEECPAAWRTRRAVRVKEVMGFQVLGVDMDLGESTY…
Eurotiomycetes	Aspergillus_mulundensis_DSM_5745_GCA_003369625.1	SAT-KS-AT-PT-xCP	MKDNTHSTTLIFFGNEFPNDDLKGLFRCLLRLSKDRRFRQLAAFLEESTLILKKEVAALPQPLRDLVPHFHTVLPLAELGDFRQGPLGAAMESALLTILELGMFIGHYEAEGRDWDLFEHNTTLAGLSIGLLAGAGVALSTNLAEVAQNGAECVRVSFRLGVYVSEISRKLEAPQADGALLSWAHVVTGETKPAIQDELSKYNSESGTPELLKAFISAADKTSVSVSGPPSRMKACFSSSHLLRYSKSFALPVYDGLCHASHLYNENSINTVINSAESVIPVSRPVRLSLHSSNTGQPFPAATALELFQAIGTELLTGTIYLDNITDGIMKRIGDFNPTSLHVETFRTSIVFKSIRAALEAEFSDLEIKITDLVPWALKDYGTHQPRSFAQSKLAVVGM…
Eurotiomycetes	Aspergillus_mulundensis_DSM_5745_GCA_003369625.1	SAT-KS-AT-PT-xCP	MKQRKLNASPYPWIEVTWVKAKAQGVQTRRARYRFMIPGWLSRVNQVATVKLSSAKNTSKNSSDEEVGLGQLRIAFSLEDSAIMPLPSQIIVFGGLDYDYKQSLRLLATETDNVVLKSFFDRAAVALAEEVRALPCSHRSRGIPTGKSILELISKEGGSHQALEMALTCIYQFASFIRHFSTTEQPYPTGESTHIIGICSGLLTGAAISCSASVYQLVALAVRTIVVAFRVGLVAEEMRRGLALSEDDSATWSVMVPGFSRDAAIETLSRYNEDINIPSVSQVYVSASTPSGVILSGPPPAMEALLAAPCMAGRSYRRTRITALYHAPHIYDVPNVDRVLDGAFPVDIASQLSRLGMDTGAQYHGPGKKDLSGLFRSAVSGILLEPVRIDAILERITRD…
Eurotiomycetes	Aspergillus_mulundensis_DSM_5745_GCA_003369625.1	SAT-KS-AT-PT-xCP	MLANVRKEVQAAMQVIFFSNKFPVENPCELFRRLRQQSKAPQHLVLRQLLDETTAAIRDEIRLLPADLRSLLPPFQSILDLAEGYDWQRCPLAGTFECVFLCLASLGLFVGDYETRPHAFRFSRDDATVTGLGLGFLAATAIVASPALTDVPAAAADVIRIAMRAGIVVYQRAQDLEPQSLDAPLQSWTTLVKGLGEEAVQRELDGFNATETPRAGLSRIYISVVEPDGGVFINGPPSRMRQLFSSPGPLKSAPRAPLPVHGGPCHAAHLYDRADVSWVVEHVRPEVGRRECASAPRLLSMADGQPLRAQTGFELFEEATHILLTQIIRWGEVIAALELSDEERNGLVVESCGRPGVIDGLVQALRGAAVHDLTAWLADDHGGGDVAASSDGKIAVVGM…
Eurotiomycetes	Aspergillus_mulundensis_DSM_5745_GCA_003369625.1	SAT-KS-AT-PT-xCP	MTPCESHPPSPSPGPANVNLNADIPDGFILFSNELPSGDVQDVIRRLHRYAMLPRYPHLARFLQNCALVLRTEVQKLPRSLRDSVPPFHDVVTLASHWDDFKSGSLSGAWDGAFLCIYEIAMLIGAVSESYRHHETHDLSYRRPKCLVGISVGLFSAAAVAVAESLADLVSYGAESLRTAFAFCVHVQRVSWTLETTATEQATSISWATVVTGLPADTIQGELVNFNGLTDSGGSATTARPLTGVSISHVDKNSVGVTGPPSRLKQLFRQSEVLRSSRHSPLPISGGLCHAPNVYDSDDVRAIIATAEVWWRWGTRALQVPLISPFTGSPYVCSDAYRLIEAICTEALTKPLCFDKVAQGVVTQLNGPPSCQILHYGASPMSDTIIAAITNKLSASGAK…
Eurotiomycetes	Aspergillus_mulundensis_DSM_5745_GCA_003369625.1	SAT-KS-AT-PT-xCP-Te	MANKTQIILFGDLTCDAVTALRSLVNIKDNPLLVSFFERVAFALRAEIGSLPYLQRDGFVGFTHFAELLTKTRKSTARPHPAIEKALVCTYQLACFINHYSATNQPYPSFQETRLVGLCTGLLSAAAVGCCRTLTELIPLAAHTVLVAFRIGLCVSEVRDRIDPWNKNQAPWSVLIAGLQGDTAVPLLARFNEDRGIPAASRAYISTYAKTGATISGPPSTLKDLLGSEYLPKASSLKIPIHGPYHAAHLYGLKDLDGIVEHTLRTEFAAYQQQIPIISSNVRQCSTEVVTFGKLLTNFLEEILLQPLRFDRILATLTGDETVNSRPACVIRPVATSASASFAAAHKKNGLDVTVDPCITISADGVKVDGLPSGSGHLAHSKLAIIGFSGRYPDAKDNE…
Eurotiomycetes	Aspergillus_mulundensis_DSM_5745_GCA_003369625.1	SAT-KS-AT-PT-xCP-xCP-Red	MTNELKVYLFGDETFPLQPGLRTLLHHRSNIVLDDFLVRAYDAIRVLLYELPPAVRENLPNFTCLEDLLLWSPGVARCVPLEMAMRCLYQVGLFMVESDIEDFSSASCRVLGHCTGALVAAAVRCSRSPLDLVQRGLETIVVAFRTGLLVADMAQRMMSIRASDQSQSWSIIVSGLAAVEAVDQFCKRSNPPMASRPYVSAYAPNGVTVSGSPTALADLVVADEFKDFKYKAIPIYGPYHAAHLYSQHDVHEVVSGAIATRAVGAQPCPPVSDSEPDRGREDFASSMERAVADILLHPIRWDGIVDQLQTWLREVQPASLKVVPIASSADRLIYTALKQTEFASLVPSSLNPPSGPAKSPVPPMPTGKKPKLAIVGMSGRFPGAKDNDAFWDLLHQGLD…
Eurotiomycetes	Aspergillus_mulundensis_DSM_5745_GCA_003369625.1	SAT-KS-AT-PT-xCP-xCP-Te	MPSKHVLLFAHDRVPFAAVHDLNVRSKLRRRLQTFLAAASTVVQRQASALDGLERANIGSFEDLVELAETQGAQARGSIAADLVLLTTVQIGQLLVLAEDQPSLLSEDGAVPMAFGTGLLAAGVAAAATTADEIITLGLEAVAVAFRLGLVLQRRARDIEDSQGAWARVVSGTADLEQGLESFNASLRPMNRVYIGQVLSDRIVVFGPPSTLDAFAKTTATVTPPATTFTQAPLHGAHLPSINASEVVGSAPAQVAEVWKLAVDQIAHKPINVEEIAAALVTDLQKTNSTDVTLTSFGESSEASGIAALLEENGVAVEVSQLGATPKPYGDDVNNIPADAIAVVGMSGRFPDSDTLDEFWRLLETATTTHQVIPQSRFTVDDFYDPTREKHNALLARFG…
Eurotiomycetes	Aspergillus_mulundensis_DSM_5745_GCA_003369625.1	SAT-KS-AT-PT-xCP-xCP-Te	MMEDPYHVYLFGDQTGDFEVGLRRLLQAKNHTILSAFFQQSYHALRQEISSLPPTERSIFPRFTSIVDLLARHCESPGNPALESALTCIYQLGCFINYYGDLGHAYPSSSKSQLVGLCTGLLSCAAVSSANNIGELLKPAVEVVVVALRLGLCVLRVRNLVDQVHAAPASWSALVSGLNEAEGMSLIESFSNDNGIAPASRPYISAVCANTLTISGPPVILNQFLETAIPRQHKAVRAPIYGPFHASHLYDGRDVQRILESCDLETICKYKPQFPVLSSNTGKLIEVGNMKDFLEVALREILLHQMSWDKVTDSCISVLKSVGDRRPKKLFPVSTSATQSLFNSLKKANLTNIEVDGGIGDITAEAQPVNHTGRTEFSKIAIIGMSGRFPEADSPQDFW…
Eurotiomycetes	Aspergillus_mulundensis_DSM_5745_GCA_003369625.1	SAT-KS-AT-xCP-MT-Red	MTRSSTPGHDASASTIFLFGPHVGTFTKASMDKLVEPLSTSPQRDWILSTIADLPTYWDALAAKMPDVARDIDGPGCLSALDSWLRHGIEQAGLSVPDDENLPSILVGPLVVLIQLTQYWRHLEMIRDDATVTPADLQAELVQQAKNGGKQTVILGFCAGLLAALSVASASTQASFEEYGAVAVRLAMLIGALIDAQEVWDKASGKGSSASYAVAWRGQKQEDDMNRITSELASDAYVAVRYDQTRATVTASETIAPLLMKRLKAAGITVAEVGIKGQIHSPNADRRGHTDALVELCASMAGLQYADVKGLALTTYDNTGTGRAVSGEGSMTEMVVRSILVQQCQWFDTFSAVADAHEDPYVVTFGLERCVPPTLMRSLGGKQVFYEDLPKDPKKPSFW…
Eurotiomycetes	Aspergillus_mulundensis_DSM_5745_GCA_003369625.1	SAT-KS-AT-xCP-Red	MQGSSHTLLAFGPQSLSFDKRALNKLRQDISRSSHRRWIQETIAELPALWTILSNALPELSEVLPPQDRLQDLSRLLEHGDSDVGDELNISNIILTPLVVLTHLTEYEHYLATEHQPIDKATATGFCTGLLSTFAVASSRTAEDLATCGPVAVRLAMLVGALVDAEEARQELLGNGRSVSYSIAWTSDDQERRLQDILKQWHPEVYLSVQYDRARATLTSSGRAAAALAQELRKNGLTVAQVRLQGRFHDPSDSRKAYTDALVDLCDRTPALQYASTPSMSLAYANPGNLSLHEIAVRSMLVQRCDWYDTFSAAYPETSDPPRVVCFGSEKCIPPSLARRMKSGHQQEPNAFAGLDQDNMIAVVGMSIKTAGADDLDEFAQMLRTGKSQHQAIKEDEIN…
Eurotiomycetes	Aspergillus_neoniger_CBS_115656_CBS_115656_GCA_003184625.1	A-xCP-KS-AT-xCP	MEKTQEETTAMVPENDFNLTDDPSKLGHNVVSLFNQIQTRYSPKPAIVCGDHTITYGALASESDRLACLLLSRGISRGHVVALALDRTPDLIMFILGVLKAGAIYVPVDPALPPERVNQMLDDEALRLVIVSPASTKGGTGTSRYDYGHKAACCTTSELRDQMRYQADKKPAVGIQADDIAYILYTSGSTGKPKGVEIHHAAICNYALSVHQRPGCTDQDRVLFKSTISFDMAAFEIYVPLLCGATVVQAQAHEIGDPRALIYLLDRHSVTFSVATPTILQMLLDSGWSGTPGFSRLVTGGEALSPRLAERLTACVDEVWNLYGPTETTASVAAWKVQAREDILIGTPNPNTRLYVLDTDMQPVPVGSTAKLYISGAGVARGYRNNPERTKAAFLPDPF…
Eurotiomycetes	Aspergillus_neoniger_CBS_115656_CBS_115656_GCA_003184625.1	ER-KS-AT-DH-MT-KR-xCP	MTDFRMPPTQTAIVGMPSGFLGISHETKVPELEDDMILVRNEAVGLNPIDTKLVGKLFTVNAIAGMDFAGTIVALGSKVTTAADLQVGDRVCGAVMGMHSLTPTVGAFAQYVGASDVVTLKIPPDMSFEAGASMGTAIGTIGLALFTSLALPGSPLHPVQTPMTVLVYGGSTATGTMAIQILKLSGYRPIATCSPRNFNLVRSYGADAVFDYKAPHCVTDIRASTKNGLKYVLDCISEPETMAFCYKCLGRSGGKYTGLEPYPASLHTRPTVQPDWVLGPTLLGKPIGWAAPFAREGCSETRRFALEWFTIAQKLLDEGLLKTHPIQRMEGGFEGVLAGLELLRSKKVSGKKLVYTVSLYMLSHTVVLREQESATILLQAKEKQLVPFNMTSVPHPEPI…
Eurotiomycetes	Aspergillus_neoniger_CBS_115656_CBS_115656_GCA_003184625.1	KR-KS-AT-xCP-xCP-MT	MANTELIHRLTWSPATLSQEPLSIANVVFVVTDKESGSLSAYQTQLTNESITTVVTGDAMKIDPLITPGTIVVYIPPTVKSKEEIYAAATQACASLINVTQQLYHRIISAKSETVKLFSIVPKDWGISDLVYAPLHGLSRMLKTEIPEVFGGLFEDDRGFFPLSAVKYAQGFDVVRVCEGEARVAYLQPFTDEPSDKKGLQLHANSSYLITGGTGGIGLATATWLAQRGAQNIVLVSRRGLPPSSDSKPVEANSADPSSRIAKLKAVGVSVHVLAVDISKPNADVTLNQAINDLGIPPIKGVIHAAGTAGYHTLTRCTPTDIADNLAPKVIGSLDLDSLFPPGTLDFFVFTSSVGQLVGFPGQLAYAPSIAFLDALAAHRRRQGDNSMAILWTGWQGTG…
Eurotiomycetes	Aspergillus_neoniger_CBS_115656_CBS_115656_GCA_003184625.1	SAT-KS-AT-PT-xCP	MSAPTKLVFFGNEFPNDDLKTLFRGLHRHGKDRRFRQLATFLEESTRVLQNEVAQLPEQLKKLVPHFENLMPLTEVDFRQGPLGAAMESALLTILELGMFIGHYEAEEHAWDLSADRTTLAGLSIGLLAAAGVALSTHLAEVVQNGAECVRVSFRLGVYVHDISRKLEAPQADGSLLSWAHVVTGETASDLQEELSRYNTETGTPELLKVFISAADKTSVSVSGPPSRIRAAFRASQRLRYSKSLALPVYDGLCHAAHLYDEETIHRVLYPDGSVIPTSRPVQLALLSSRSGQPFEATTAAELFRAISTELLTGTIFLDNITAGILDRTERCADATQCQIETYRTSLVFKGLLKALEACFPDRTIKTTDLIPWVFQDYGARQPKSYADSKLAIVGMACR…
Eurotiomycetes	Aspergillus_neoniger_CBS_115656_CBS_115656_GCA_003184625.1	SAT-KS-AT-PT-xCP-xCP-Te	MEGPSRVYLFGDQTSDIEAGLRRLLQAKNSTIVQSFFQQCFHAIRQEIAKLPPSQRKLFPRFTSIVDLLSRSRESGPSPVLESALTCIYQLGCFIHFYGDLGHDYPTSSNSHLVGLCTGLLSCTAVSSARNVGELIPVAVEAIVIALRLGICVFRVRELVASAESESTCWSALVSGISEAEASRLIDEYSSKKATPPSSKPYISAVSSNGVTVSAPPTVLDEFVETCISKNYKPVKAPIHGPYHAPHLYDDKDIERILQQSSALEELTGWSPAIPVISSNTGKPIKAKSLKDLFKVALEEILLRRLCWDKVTESCTSVCKAGTNHSCKLFPISSSATQSLFTVLKKAGVSISLETGVGEIAINPETRNLTGKAENSKIAIIGMSGRFPETDGTEAFWDL…
Eurotiomycetes	Aspergillus_neoniger_CBS_115656_CBS_115656_GCA_003184625.1	SAT-KS-AT-PT-xCP-xCP-Te	MSKMETVAEVFIFGDQTVAFESTLHSLLHVKDNAVLTDFFDRVGYQLRRYVGNLPLHQQEWFPYFTTLIDLLAQHENCHAAPALKLPLLCATELGQFIRHYGQAGRTYPAPESTFLIGACTGAFSAAAVATSQTLAELVPAAVEAVTVAFRTALQSLILRNDLELNIDGSQKSWSAIVGVCEPEASSAIRCFNVEKGLPPVARLYLSSVSRTNVSISGPPRLLGQFLLSCAWKHSLLPIELPYHASHLFRKDDAENIVGEFHDFSLLKYTQRTKVICAVSGEVVVASDLRSLLHRAVQEALCEPLQWNFIAASLSQELKQCQFTVCVINQVSTRSGSLISSALSQEAFLGVKIVQSIGDVAVSPALSSPTGKFSQSSIAIIGFSGRFPESGSNEEFWEM…
Eurotiomycetes	Aspergillus_nidulans_5mAN_CM5298_GCA_027569745.1	SAT-KS-AT-DH-xCP-xCP-MT	MAPAPSALVFGSQTTLPSVEAASRLRAALLLDPRLYRMRTSIESLPEIWPALAISDPALERVAGPAEKSLRQLCRWLSHSEFPDATEISELPATFVTPFTVILHTVLYMHYTDENGSRGHADVLRAVRNNGGVQGFCTGFLTAVSVATSPDLEALSRQASVALRLAVAIGAYIDLDLLDSDVSSVAVRSRAGKKGLEETLAQFPGAYISVITDELNATVTAPRASLDALSQSLASNGLSAKRFDLRGRFHHPAHQKALEGLYNLVASNPVFQFSHSELLAPVYSNIDGQLLSSDSIIDTLLQSILVQRCDWYASISTALHKRSNGEKTSVVQFSLVECIPPSVLRQARLSVQRITDVPVQNSPATVPAPLNAVRARIQTSEPIAIIGMGCKFPGADTLD…
Eurotiomycetes	Aspergillus_nidulans_5mAN_CM5298_GCA_027569745.1	SAT-KS-AT-PT-xCP	MTPSASPSPSPNPGDANVKVDADSPNDFILFSHELPSGDIQDLIRRLHRYSTLPGYPHLARFLQECALLLRTEIQKLPRALRDSVPPFHDVVTLASHWDRLKSGPLSGAWDGPFLCLYEIAMLIGHHETHQLSYRRPACLVGISVGLFSAAAVAVSKSISDLVSYGAESVRTAFAFCVHVQRVSQELEPTMTEQAASVSWATVVIGVPADTIQVELDRFNHLKESESPGANARPLTGVSISHVDQTSVGVTGPPSRLKQLFRQSELLRSSRHSALPISGGLCHVPNVYDDEDVRAILEMAEVWEKWGTRALQVPLISPFTGSPFLCPDAYHLIEAICTEALTKQLYFDKLAGGVVTQLNGLSCQVLHYGASLMSDTIIDDVTSQLSPCDTARQCLVDWA…
Eurotiomycetes	Aspergillus_nidulans_5mAN_CM5298_GCA_027569745.1	SAT-KS-AT-PT-xCP	MPVYTPQSGSLPEYSKMKLLYFSNELPKDDLQGLFRRLYNHSKDRRYPLLARFIHEATLAVREEVRQLPTAVKALVPAFETVLNLADYPELRKGPLGGSLEGVLLCVLEIATLIGHVPRLYFKEAADCCSYYENASERFDLHAVSTYLAGLGLGLLSTAAVALCSALADVPVIGAEVVRVSFRLGTLVDEISQNLEPRDTSGSPDTWASVVPGAKVEEVQAELDAIHAREKTPQPSKIFISAWNEGSVTISGPPSRIRRVLRLSEFFRRHRVVSLPVYSGLCHAKHLYNEQHAREIISTRSMDSINALYSPAIPVYQTSTGRPFTASTAKGLFEQLVLELLTQPILWDNVVQGVVDQAYATSATSCDVLVFRISVPINDLRTALGSKLQGFETSTEELI…
Eurotiomycetes	Aspergillus_nidulans_5mAN_CM5298_GCA_027569745.1	SAT-KS-AT-PT-xCP	MKDNTHSTTLIFFGNEFPNDDLKGLFRCLLRLSKDRRFRQLAAFLEESTLVLKKEVAALPQPLRDLVPHFHTVLPLAELGDFRQGPLGAAMESALLTVLELGMFIGHYEAEGRDWNLLEHNTTLAGLSIGLLAAAGVALSTNLAEVAQNGAECVRVSFRLGVYVSEISRKLEAPQADGTLLSWAHVVTGETKSAIQDELSKYNSESGTPELLKVFISAADKTSVSVSGPPSRMKACFSSSHLLRYSKSFALPVYDGLCHASHLYNEDSINTVINSAESVIPVSRPVQLSLHSSNTGQPFPAATAHELFQAIGKELLTGTIYLDNIIDGIIKRIEGFNPSDLQVETFRTSIVFKSVRAALEGEFPDLEIKITDLIPWAFRDYGPRLPRSFAHSKLAVVGM…
Eurotiomycetes	Aspergillus_nidulans_5mAN_CM5298_GCA_027569745.1	SAT-KS-AT-PT-xCP	MLHPTEVEGSICLEESTLWYFGNELPNDDVNELFRHLLQHSKDRRFRILSAYLEESTLVLQNEIARLPHHVRSRVPHFDNIATLFEEGHLRDLGLGAAMESARLLVLQLGLFIGHHEANGCELDLSNHMATIAGLSVGLFSGAALALSKTLADVVKNGAECLRVSFRLGVYVAGFSSKLEAAQPDGMLNQSWAHVVTGMTEESIRNELARVNDELGNPNLSKVFISAADKSSVSVSGPPSRVKAAFLHSSDLRYSKSLPLPVYDGLCHAEHLYSQDDVSAVLNLSESLIRHSRPLRAPLLSSTTGEPFAARTAGELLSEVVTELITGTIYVDLIVSGIIRHVGSFPEQKACRINSFRTSIIFNGILEAVAESFPGMAVKQNDLVDWVYQDFGTRRPINP…
Eurotiomycetes	Aspergillus_nidulans_5mAN_CM5298_GCA_027569745.1	SAT-KS-AT-PT-xCP-xCP-Te	MAPNHVLFFPQERVTFDAVHDLNVRSKSRRRLQSLLAAASNVVQHWTASLDGLERADIGSFEDLVELAERQTTQTRGSIVADLVLLTTVQIGQLLVLAEDDPAILSGHAGARAIPMGFGAGLVAAGVAAAATSADGIVNLGLEAVSVAFRLGVELQRRGKDIEDSNGPWAQVISSATTIADLEQALDRINASLRPINQAYIGEVMTESTVVFGPPSTLDALAKRPELAHATITSPASALAQVPLHGAHLPPISATMIAASSSQQATELWKLAVEEVANKPIDVHQAVTALIHDLHRANITDIVLTAIGASTETSGIQSLLEKNGLAVELGQLSPTPRPYGNDLDSIPADAIAVVGMSGRFPNSDTLDEFWRLLETATTTHQVIPESRFNVDDFYDPTRA…
Eurotiomycetes	Aspergillus_nidulans_5mAN_CM5298_GCA_027569745.1	SAT-KS-AT-PT-xCP-xCP-Te	MASHAEPTRLFLFGDQTYDFVADLRDLLNIRNNPILVAFLEQSHHVIRAQMIRELPPKEHKQARTASLAELLQKYVDRKLPSAFQTALSCVTQIGLFMRQFDDPRVLYPHANDSYVLGVCTGSLAAAAISCSTSLSELLPIAVQTVLVAFRLGLWAEKVRDNLEISETNQTQPWSAVCHVPPEEVAIAIDRFSHKKALSNTRRPWITATSAKTTTVSASPDILSQLASQAPFTNSKLWREIPIYVPAHNNHLFSSRDVDDILATTNENPWSTFGAQIPFLSSVTGKLAWVRNYRDLLHLALSQCLIEPIRWDVVEAEVPRLLKDRDGLDTLTIVAFTTVLSKSLSNALVTEGIKPAEPPTSINKTPERYSHRPGSDRGKLAIVSMSGRFPEAPSTDSFW…
Eurotiomycetes	Aspergillus_nidulans_5mAN_CM5298_GCA_027569745.1	SAT-KS-AT-PT-xCP-xCP-Te	MEDPYRVYLFGDQTGDFEVGLRRLLQAKNHSLLSSFLQRSYHAVRQEISHLPPSERSTFPRFTSIGDLLARHCESPGNPAIESVLTCIYQLGCFINYYGDLGHTFPSHSQSQLVGLCTGLLSCAAVSCASNIGELLKPAVEVVVVALRLGLCVYRVRKLFGQDQAAPLSWSALVSGLSESEGTSLIDKFTRRNVIPPSSRPYISAVCANTLTISGPPVVLNQFLDTFISGKNKAVMVPIHGPFHASHLYEKRDVEWILKSCNVETIRNHKPRIPVLSSNTGELIVVENMEGFLKIALEEILLRQMSWDKVTDSCISILKSVGDNKPKKLLPISSTATQSLFNSLKKSNLVNIEVDGGISDFAAETQLVNQTGRAELSKIAIIGMSGRFPEADSPQDFWN…
Eurotiomycetes	Aspergillus_nidulans_5mAN_CM5298_GCA_027569745.1	SAT-KS-AT-xCP-MT-Red	MTRASASGSGHEASTVFLFGPHVGTFTKASMDKLVRPLSQSPQRDWILRTIADLPTYWDALAAKMPDIARDIDGPTSLSELDRWLRHSLDTAGLSVSDDESLPSILVGPLVVLIQLTQYWRHLEMIRDGSAPAVDLQAELVQQTQSGSRPTVILGFCAGLLAALSVASARNQAGFEEYGAVAVRLAMLIGALIDAQEVWDKASGKGSSASYAVAWRGQKQEDEMNRIIGDLSNDAYVAVRYDQARATVTASETIAPLLMKRLRAAGVTVAEVGIKGQIHSPNADRKQHTNALVELCASLPGLQYAEVSKLALQTYDNQGSGIPVSGSGNMTEMVVRSILVQQCRWFDTFSAVADALPDPYVVTFGLERCVPPTLMRTLGGRQVFYEDLPKDPEKPSFWL…
Eurotiomycetes	Aspergillus_nidulans_5mAN_CM5298_GCA_027569745.1	SAT-KS-AT-xCP-MT-Red	MASSSSSTQAENLILIFGPQDPNLNDAYLQSLRTNLLDSPFLQWIVHTLIQLPQEWQRIAPTHTELGSFQGQKYLQLLSEWMRKGTLPGNIFPLPNILVTPLVVTTHLAQYTKLLEQLNPAIATNDMLSGIVKHDIQTVGLCTGLLSSAAVASSATLAELEKHGAAAIRMAMAIGALVDAGDTEVEDGDKWQSLAVGWTTQNGDAELEGISKQFSHAYVSVISEARLATLTMLKNDANAIQRELTNAGFIYTKTALRGPFHCGSREDQAVSLMRLFDSDPSFQFPGASTLVFRTRAPDGEEFPLDRSLHGAAARAMLTDQADWHKLYTKLHESTNSHPGIVITFGSQRFIPQWFLRKLGPRLAHVLDLDVGSGHWPAPLYTLQDSGQDESIAVVGMACN…
Eurotiomycetes	Aspergillus_nidulans_5mAN_CM5298_GCA_027569745.1	SAT-KS-AT-xCP-MT-Red	MLGHRDFTTLPLSRREFLLFGPLALSFDQAAFEHLRKTIVNSEEHRWALEVLGSLPQYYATIVNAFPGINGRNEVQLEDLKGALHSGKPLATSFPLPNTLLIPLVMVLHLTEYSRFLQEISEELESGIDLFDASRHNKETVGFCTGLLSAMAVSSAGSREEFRKYAAVAVRLGLLVGVVVDSHDISSAQGPSKSISASWNSAQKREDARRIMDEFPQAYISVYYDEDRATITAPASEISDLHRRLRASGIVTAEIGLNGCFHADCYLDQLDPIIQFCDSQPDFQLPDASKVVIPTRSNATGELIRDGALHQHALRSILVEPPQWFESFTAVRDACAEDEGAIIFSFGPERCVPPSLLRVLSQKVVTVEDLDVLKRYQYSYSENDIAVVGMSCKVAGANN…
Eurotiomycetes	Aspergillus_nidulans_5mAN_CM5298_GCA_027569745.1	SAT-KS-AT-xCP-Red	MKPSSNICQATSFIFGGHIGPQTKNSLEKEIREVANGPNGGWILDTLAGMPRYWEAVTEKIPEVASTMQGVQLLSDLESWFRIGSDSVDSLAPDAELPDLWLGILMVIIQLDQYWRYLESRFADRAIDDLQGELIKEEKVEAVGFCAGMIAAVAIASSHTRQEFKKYGAVALRIAALMAILVGATEEWTKAMGKGRSVSFATAWRTRKQGDDMARIISKLSPDAYISVILDDSRATVTVSERLAPKLVRQLRAAGVTAIQLAFKGQLHSPTAERKRLTEAVVELCQSMPELRYPVAARLALPINQVSGQETDLVGMVLRSMLVNQLNWTSTTSMLTLNKEELSRVEFGLDRPLPPPVVRAFGAMLDYKEVDVPKHRQYDKGKEPVHDTESVQVAEPPLQ…
Eurotiomycetes	Aspergillus_nidulans_5mAN_CM5298_GCA_027569745.1	SAT-KS-AT-xCP-Red	MQGSSHTLLAFGPQSLSFDKRALIKLRGDISSGRYGQWIQDTIAGLPGFWTALSEALPELRELLPPQERLQDLDRLLNHSIDDIEEGLSISNMILTPLVVLTHLTEYERYLATNQHTSDRTTATGFCTGLLSTFAIASSRNDQELAKYGAVALRLAMLVGALVDAEERRQELQGNGRSVSYSIAWMSEEQQQRLQEILGQRHPETYLSVRYDRARATLTSSGRAAADLAQELREIGLTVAQVRLQGRFHDPSESRKAYTDALADLCNRTPELQFAPTPAMSLAYPKIDNASLHEVAVRSMLVQHCDWYDTFKAAYPEVSSPARVVCFGSERCIPPTLAKRTVKIESQHQASDAFASLDQENMIAVVGMSIKTAGADDVDEFAQMLRTGTSQHQAIMEDD…
Eurotiomycetes	Aspergillus_nidulans_FGSC_A4_FGSC_A4_GCA_000011425.1	SAT-KS-AT-DH-xCP-xCP-MT	MAPAPSALVFGSQTTLPSVEAASRLRAALLLDPRLYRMRTSIESLPEIWPALAISDPALERVAGPAEKSLRQLCRWLSHSEFPDATEISELPATFVTPFTVILHTVLYMHYTDENGSRGHADVLRAVRNNGGVQGFCTGFLTAVSVATSPDLEALSRQASVALRLAVAIGAYIDLDLLDSDVSSVAVRSRAGKKGLEETLAQFPGAYISVITDELNATVTAPRASLDALSQSLASNGLSAKRFDLRGRFHHPAHQKALEGLYNLVASNPVFQFSHSELLAPVYSNIDGQLLSSDSIIDTLLQSILVQRCDWYASISTALHKRSNGEKTSVVQFSLVECIPPSVLRQARLSVQRITDVPVQNSPATVPAPLNAVRARIQTSEPIAIIGMGCKFPGADTLD…
Eurotiomycetes	Aspergillus_nidulans_FGSC_A4_FGSC_A4_GCA_000011425.1	SAT-KS-AT-PT-xCP	MKDNTHSTTLIFFGNEFPNDDLKGLFRCLLRLSKDRRFRQLAAFLEESTLVLKKEVAALPQPLRDLVPHFHTVLPLAELGDFRQGPLGAAMESALLTVLELGMFIGHYEAEGRDWNLLEHNTTLAGLSIGLLAAAGVALSTNLAEVAQNGAECVRVSFRLGVYVSEISRKLEAPQADGTLLSWAHVVTGETKSAIQDELSKYNSESGTPELLKVFISAADKTSVSVSGPPSRMKACFSSSHLLRYSKSFALPVYDGLCHASHLYNEDSINTVINSAESVIPVSRPVQLSLHSSNTGQPFPAATAHELFQAIGKELLTGTIYLDNIIDGIIKRIEGFNPSDLQVETFRTSIVFKSVRAALEGEFPDLEIKITDLIPWAFRDYGPRLPRSFAHSKLAVVGM…
Eurotiomycetes	Aspergillus_nidulans_FGSC_A4_FGSC_A4_GCA_000011425.1	SAT-KS-AT-PT-xCP	MTPSASPSPSPNPGDANVKVDADSPNDFILFSHELPSGDIQDLIRRLHRYGTLPGYPHLARFLQECALLLRTEIQKLPRALRDSVPPFHDVVTLASHWDRLKSGPLSGAWDGPFLCLYEIAMLIGHHETHQLSYRRPACLVGISVGLFSAAAVAVSKSISDLVSYGAESVRTAFAFCVHVQRVSQELEPTMTEQAASVSWATVVIGVPADTIQVELDRFNHLKESESPGANARPLTGVSISHVDQTSVGVTGPPSRLKQLFRQSELLRSSRHSALPISGGLCHVPNVYDDEDVRAILEMAEVWEKWGTRALQVPLISPFTGSPFLCPDAYHLIEAICTEALTKQLYFDKLAGGVVTQLNGLSCQVLHYGASLMSDTIIDDVTSQLSPCDTARQCLVDWA…
Eurotiomycetes	Aspergillus_nidulans_FGSC_A4_FGSC_A4_GCA_000011425.1	SAT-KS-AT-PT-xCP	MPVYTPQSGSLPEYSKMKLLYFSNELPKDDLQGLFRRLYNHSKDRRYPLLARFIHEATLAVREEVRQLPTAVKALVPAFETVLNLADYPELRKGPLGGSLEGVLLCVLEIATLIGHVPRLYFKEAADCCSYYENASERFDLHAVSTYLAGLGLGLLSTAAVALCSALADVPVIGAEVVRVSFRLGTLVDEISQNLEPRDTSGSPDTWASVVPGAKVEEVQAELDAIHAREKTPQPSKIFISAWNEGSVTISGPPSRIRRVLRLSEFFRRHRVVSLPVYSGLCHAKHLYNEQHAREIISTRSMDSINALYSPAIPVYQTSTGRPFTASTAKGLFEQLVLELLTQPILWDNVVQGVVDQAYATSATSCDVLVFRISVPINDLRTALGSKLQGFETSTEELI…
Eurotiomycetes	Aspergillus_nidulans_FGSC_A4_FGSC_A4_GCA_000011425.1	SAT-KS-AT-PT-xCP-xCP-Te	MAPNHVLFFPQERVTFDAVHDLNVRSKSRRRLQSLLAAASNVVQHWTASLDGLERADIGSFEDLVELAERQTTQTRGSIVADLVLLTTVQIGQLLVLAEDDPAILSGHAGARAIPMGFGAGLVAAGVAAAATSADGIVNLGLEAVSVAFRLGVELQRRGKDIEDSNGPWAQVISSATTIADLEQALDRINASLRPINQAYIGEVMTESTVVFGPPSTLDALAKRPELAHATITSPASALAQVPLHGAHLPPISATMIAASSSQQATELWKLAVEEVANKPIDVHQAVTALIHDLHRANITDIVLTAIGASTETSGIQSLLEKNGLAVELGQLSPTPRPYGNDLDSIPADAIAVVGMSGRFPNSDTLDEFWRLLETATTTHQVIPESRFNVDDFYDPTRA…
Eurotiomycetes	Aspergillus_nidulans_FGSC_A4_FGSC_A4_GCA_000011425.1	SAT-KS-AT-PT-xCP-xCP-Te	MEDPYRVYLFGDQTGDFEVGLRRLLQAKNHSLLSSFLQRSYHAVRQEISHLPPSERSTFPRFTSIGDLLARHCESPGNPAIESVLTCIYQLGCFINYYGDLGHTFPSHSQSQLVGLCTGLLSCAAVSCASNIGELLKPAVEVVVVALRLGLCVYRVRKLFGQDQAAPLSWSALVSGLSESEGTSLIDKFTRRNVIPPSSRPYISAVCANTLTISGPPVVLNQFLDTFISGKNKAVMVPIHGPFHASHLYEKRDVEWILKSCNVETIRNHKPRIPVLSSNTGELIVVENMEGFLKIALEEILLRQMSWDKVTDSCISILKSVGDNKPKKLLPISSTATQSLFNSLKKSNLVNIEVDGGISDFAAETQLVNQTGRAELSKIAIIGMSGRFPEADSPQDFWN…
Eurotiomycetes	Aspergillus_nidulans_FGSC_A4_FGSC_A4_GCA_000011425.1	SAT-KS-AT-PT-xCP-xCP-Te	MASHAEPTRLFLFGDQTYDFVADLRDLLNIRNNPILVAFLEQSHHVIRAQMIRELPPKEHKQARTASLAELLQKYVDRKLPSAFQTALSCVTQIGLFMRQFDDPRVLYPHANDSYVLGVCTGSLAAAAISCSTSLSELLPIAVQTVLVAFRLGLWAEKVRDNLEISETNQTQPWSAVCHVPPEEVAIAIDRFSHKKALSNTRRPWITATSAKTTTVSASPDILSQLASQAPFTNSKLWREIPIYVPAHNNHLFSSRDVDDILATTNENPWSTFGAQIPFLSSVTGKLAWVRNYRDLLHLALSQCLIEPIRWDVVEAEVPRLLKDRDGLDTLTIVAFTTVLSKSLSNALVTEGIKPAEPPTSINKTPERYSHRPGSDRGKLAIVSMSGRFPEAPSTDSFW…
Eurotiomycetes	Aspergillus_nidulans_FGSC_A4_FGSC_A4_GCA_000011425.1	SAT-KS-AT-xCP-MT-Red	MLGHRDFTTLPLSRREFLLFGPLALSFDQAAFEHLRKTIVNSEEHRWALEVLGSLPQYYATIVNAFPGINGRNEVQLEDLKGALHSGKPLATSFPLPNTLLIPLVMVLHLTEYSRFLQEISEELESGIDLFDASRHNKETVGFCTGLLSAMAVSSAGSREDFRKYAAVAVRLGLLVGVVVDSHDISSAQGPSKSISASWNSAQKREDARRIMDEFPQAYISVYYDEDRATITAPASEISDLHRRLRASGIVTAEIGLNGCFHADCYLDQLDPIIQFCDSQPDFQLPDASKVVIPTRSNATGELIRDGALHQHALRSILVEPPQWFESFTAVRDACAEDEGAIIFSFGPERCVPPSLLRVLSQKVVTVEDLDVLKRYQYSYSENDIAVVGMSCKVAGANN…
Eurotiomycetes	Aspergillus_nidulans_FGSC_A4_FGSC_A4_GCA_000011425.1	SAT-KS-AT-xCP-MT-Red	MTRASASGSGHEASTVFLFGPHVGTFTKASMDKLVRPLSQSPQRDWILRTIADLPTYWDALAAKMPDIARDIDGPTSLSELDRWLRHSLDTAGLSVSDDESLPSILVGPLVVLIQLTQYWRHLEMIRDGSAPAVDLQAELVQQTQSGSRPTVILGFCAGLLAALSVASARNQAGFEEYGAVAVRLAMLIGALIDAQEVWDKASGKGSSASYAVAWRGQKQEDEMNRIIGDLSNDAYVAVRYDQARATVTASETIAPLLMKRLRAAGVTVAEVGIKGQIHSPNADRKQHTNALVELCASLPGLQYAEVSKLALQTYDNQGSGIPVSGSGNMTEMVVRSILVQQCRWFDTFSAVADALPDPYVVTFGLERCVPPTLMRTLGGRQVFYEDLPKDPEKPSFWL…
Eurotiomycetes	Aspergillus_nidulans_FGSC_A4_FGSC_A4_GCA_000011425.1	SAT-KS-AT-xCP-MT-Red	MASSSSSTQAENLILIFGPQDPNLNDAYLQSLRTNLLDSPFLQWIVHTLIQLPQEWQRIAPTHTELGSFQGQKYLQLLSEWMRKGTLPGNIFPLPNILVTPLVVTTHLAQYTKLLEQLNPAIATNDMLSGIVKHDIQTVGLCTGLLSSAAVASSATLAELEKHGAAAIRMAMAIGALVDAGDTEVEDGDKWQSLAVGWTTQNGDAELEGISKQFSHAYVSVISEARLATLTMLKNDANAIQRELTNAGFIYTKTALRGPFHCGSREDQAVSLMRLFDSDPSFQFPGASTLVFRTRAPDGEEFPLDRSLHGAAARAMLTDQADWHKLYTKLHESTNSHPGIVITFGSQRFIPQWFLRKLGPRLAHVLDLDVGSGHWPAPLYTLQDSGQDESIAVVGMACN…
Eurotiomycetes	Aspergillus_nidulans_FGSC_A4_FGSC_A4_GCA_000011425.1	SAT-KS-AT-xCP-Red	MQGSSHTLLAFGPQSLSFDKRALIKLRGDISSGRYGQWIQDTIAGLPGFWTALSEALPELRELLPPQERLQDLDRLLNHSIDDIEEGLSISNMILTPLVVLTHLTEYERYLATNQHTSDRTTATGFCTGLLSTFAIASSRNDQELAKYGAVALRLAMLVGALVDAEERRQELQGNGRSVSYSIAWMSEEQQQRLQEILGQRHPETYLSVRYDRARATLTSSGRAAADLAQELREIGLTVAQVRLQGRFHDPSESRKAYTDALADLCNRTPELQFAPTPAMSLAYPKIDNASLHEVAVRSMLVQHCDWYDTFKAAYPEVSSPARVVCFGSERCIPPTLAKRTVKIESQHQASDAFASLDQENMIAVVGMSIKTAGADDVDEFAQMLRTGTSQHQAIMEDD…
Eurotiomycetes	Aspergillus_nidulans_FGSC_A4_FGSC_A4_GCA_000011425.1	SAT-KS-AT-xCP-Red	MKPSSNICQATSFIFGGHIGPQTKNSLEKEIREVANGPNGGWILDTLAGMPRYWEAVTEKIPEVASTMQGVQLLSDLESWFRIGSDSVDSLAPDAELPDLWLGILMVIIQLDQYWRYLESRFADRAVDDLQGELIKEEKVEAVGFCAGMIAAVAIASSHTRQEFKKYGAVALRIAALMAILVGATEEWTKAMGKGRSVSFATAWRTRKQGDDMARIISKLSPDAYISVILDDSRATVTVSERLAPKLVRQLRAAGVTAIQLAFKGQLHSPTAERKRLTEAVVELCQSMPELRYPVAARLALPINQVSGQETDLVGMVLRSMLVNQLNWTSTTSMLTLNKEELSRVEFGLDRPLPPPVVRAFGAMLDYKEVDVPKHRQYDKGKEPVHDTESVQVAEPPLQ…
Eurotiomycetes	Aspergillus_niger_3.316_GCA_013618955.1	A-xCP-KS-AT-xCP	MVPENEFNLTDDPSKLGHNVVSLFEQIQSRYSPKPAIVCGDHTITYGVLASESDRLACLLLSRGISRGHVVALALDRTPDLIIFILGVLKAGAAYVPIDPALPSERVNQMLDDEALRLVIVSHASTKGMTSNCRCDYGHKAACCTTSELRDQMRYQADKKPAVDIQGDDLAYILYTSGSTGKPKGVEVHHAAICNYALSVHQRPGCTDQDRVLFRSTISFDMSAIEIYVPLLCGATVVQAQTYEIRDPRALIHLINHHAVTFAVTTPTILQMLLDSGWCGTPGLSKLLTGGEALSPRLAERLTACVEEVWNIYGPTETTMSVATWKVQVGEDILIGTPKANIRLYVLDADMRPVPVGGTGELYISGAGVARGYRNNPERTKAVFLPDPFWEGHTMYKSG…
Eurotiomycetes	Aspergillus_niger_3.316_GCA_013618955.1	KR-KS-AT-DH-xCP-xCP-MT-Te	METFNEIPALNAILARWQQLTAATTGWWLLWAGGLTLILGLLQLARTWWSLRHIPGPFLASISNLPRVWWQITGRAHLYHQAAHAKYGDVVRIGPRMVSFSNPEAIPTVYPVRPGFPKGDLYSALRPYTSERGPIYLVFNTQDESMHKLIKSPIAPLFSLSSVVQFEGLVDEVLAVLSKQLDERFVATGETFDCADWLHFFSFDVMGTLSFSKQYGALEQGRDVNGMLSEVYRFFQLAAPMTQITWLDPILYKNRLVHTLRKLQKKTPSMSILDFASRAIKERIAKEDNGKEDPNFPPRRKDFLDRFLEIHSQSSKLPPWASTAWTFSNIIAGSDSVGTVMKTAVCEFVNLLSHPDSLEKLQRELDGANLTRPYPLWEQVRDLPYLDACIQEAARVHPP…
Eurotiomycetes	Aspergillus_niger_3.316_GCA_013618955.1	KR-KS-AT-DH-xCP-xCP-MT-Te	MANDELIHKLTWSPAALSKEPLSIAHVVFVVAEKESESLSAYQAQLANEGITTVVTDDAMKINPLITPKTIVVYIPPTAKSKEEIYAAATQACTSLINVAQQLYHRSISAKSKTVKLFSIVPKDWGIGDLVYAPLHGLSRVLKTEIPEIMAALKYAQGFDFVRICEGEAQVAYLQPFTDELSDKKELQLHANSSYLITGGTGGIGLATAAWLAQRGARNIVLVSRRGLPPSSDSKAVEANSADLISRIAKLKAVGVSVHVLAVDISKPNADVTLSQTINDLDIPPIKGVIHAAGTAGYHTLTRCTPTDIADNLAPKVIGSLNLDALFPPGTLDFFVFTSSVGQLVGFPGQLAYAPSNAFLDALAAHRRRQGDNSMAILWAGWQGTGVWDQSKSAMRRLN…
Eurotiomycetes	Aspergillus_niger_3.316_GCA_013618955.1	SAT-KS-AT-PT-xCP	MSAPTKLVFFGNEFPNDDLKTLFRGLHRHSKDRRFRQLATFLEESTRVLQNEVAQLPEPLKKLVPHFENLMPLTEVDFRQGPLGAAMESALLTILELGLFIGHYEAEERAWDLSADRTTLAGLSIGLLAAAGVALSTHLAEVVQNGAECVRVSFRLGVYVHDISRKLEAPQADGSLLSWAHVVTGESASDLQEELSRYNTETGTPELLKVFISAADKTSVSVSGPPSRIRAAFRASQRLRYSKSLALPVYDGLCHAAHLYDEETIHRVLHPDGSVIPTSRPVQLALLSSRSGQPFEATTAAELFRAISTELLTGTIFLDNITAGILDRTERCADTTKCQIETYRTSLVFKGLLKALEACFPDRTISTTDLIPWVFQDYGARQPKSCADSKLAIVGMACR…
Eurotiomycetes	Aspergillus_niger_3.316_GCA_013618955.1	SAT-KS-AT-PT-xCP-xCP-Te	MSKMETVAEVFIFGDQTVAFESTLHSLLHVKDNAVLTDFFDRVGYQLRRYVGNLPLHQQEWFPYFTTLIDLLAQHENCHAAPALKLPLLCATELGQFIRHYGQAGRTYPAPESTFLIGACTGAFAAAAVATSQTLAELVPAAVEAVTVAFRTALRSLILRNDLELNIDGSQKSWSAIVGVCEPEAASAIRCFNVEKGLPPIARLYLSSVSRTNVSISGPPRLLGQFLLSCAWKHSLLPIELPYHASHLFRKDDVEIIVGDFHDFSLLKYTQRTKVICAVSGEVVVASDLRSLLHRAVQEALCEPLQWNCIAASLSRELKQCQLTECVINQVSTRSGSLISSALSQEAFLGVKIVQSIGDVAVSPALSSPTGKFSQSSIAIIGFSGRFPESDSNEEFWEM…
Eurotiomycetes	Aspergillus_niger_3.316_GCA_013618955.1	SAT-KS-AT-PT-xCP-xCP-Te	MEGPSRVYLFGDQTSDIEAGLRRLLQAKNSTIVQSFFQQCFHAIRQEIAKLPPSQRKLFPRFTSIVDLLSRSRESGPSPVLESALTCIYQLGCFIHFYGDLGHDYPTPSNSHLVGLCTGVLSCTAVSCAKNVGELIPAAVEAIVIALRLGICVFRVRELVASADSESTCWSALVSGISEAEASRLIDEYSSKKATPPSSKPYISAVSSNGVTVSAPPTILDEFVETCISKNYKPVKAPIHGPYHAPHLYDDKDIERILHQSSALEELTGWSPAIPVISSNTGKPIKATSIKDLFKVALEEILLRRLCWDKVTESCTSVCKTGKNHSCKLFPISSSATQSLFTVLKKAGVSISLETGIGEIAINPETRNLTGKAENSKIAIIGMSGRFPESDGTEAFWDL…
Eurotiomycetes	Aspergillus_niger_ATCC_1015_ATCC_1015_GCA_000230395.2	A-xCP-KS-AT-xCP	MVPEDDQNLTDDPSKLGHNVVSLFDQTQTRYSPKAAIVCGEHTLTYGALASDSDRLACLLLSRGISRGHVVALALDRTPDLIMFILGVLKAGATYVPVDPALPPERVNQMLDDEALRLVIVSPVSTKGGAGTGRYDYGNKAVCCTTSELQDQMRYQADKRPAVDIQPDDIAYILYTSGSTGKPKGVEIHHAAICNYALSVHQRPGCTDQDRVLFKSTISFDMAAFEIYVPLLCGATVVQAQAHDIRDPRALMHLIDRHSVTFSVATPTILQMMLDSGWCGTPGFSKLVTGGEALSPRLAERLTACVEEVWNLYGPTETTASVAAWKVQVGEDILIGTPNPNTRLYVLDADLQPVPVGSTGELYISGAGVARGYRNNPERTKAAFLPDPFWEGHTMYKSG…
Eurotiomycetes	Aspergillus_niger_ATCC_1015_ATCC_1015_GCA_000230395.2	SAT-KS-AT-PT-xCP	MRLFFFSNKFPIDDLPDLFRRLRLCSQSPRHVVLRRFLEEATRVVREEIYRLPPELRSLIPPFQSILDLAQNYHWHKGPLCGIFECIFLCLVQLGLFVGNYEIRPHEFSFNTQESLFTGLGLGFLAATAVVASPSLLDLPITAAEVVRIAMRAGILLYQKSQDLEQLSLDSSLESWTTVVRGLDESIVRGELEKFNKSMETPPSSRIYISVVEPDGSVFISGPPSGLREFFNKSGKVQSAPRAPLPVYGGPCHAAHLYDRTHTEWVVSKVNPEIASRRLSGHPLVLSMGDGQPLAGENARDLFESATYVLLTSIIRWDSVLAAVKKLPHWKQDTKLQLETFRPSSPAVHGLISAVQSEYPDCTVSVDDLGDWIIDNSLEPPTIPIDSRIAVVGMSCRLP…
Eurotiomycetes	Aspergillus_niger_ATCC_1015_ATCC_1015_GCA_000230395.2	SAT-KS-AT-PT-xCP	MSAPTKLVFFGNEFPNDDLKALFRGLHRHGKDRRFRQLATFLEESTRVLQNEVAQLPEPLKKLVPHFENLMPLTEVDFRQGPLGAAMESALLTILELGMFIGHYEAEERVWDLSADRATLAGLSIGLLAAAGVALSTHLAEVVQNGAECVRVSFRLGVYVHDISRKLEAPQADGSLLSWAHVVTGETASDLQEELSRYNTETGTPELLKVFISAADKTSVSVSGPPSRIRAAFRASQRLRYSKSLALPVYDGLCHAAHLYDEETIHRVLHPDGSVIPTSRPVQLALLSSRSGQPFEATTAAELFRAISTELLTGTIFLDNITAGILDRTERCADATQCQIETYRTSLVFKGLLKALEACFPDRTISTTDLIPWVFQDYGARQPKSCADSKLAIVGMACR…
Eurotiomycetes	Aspergillus_niger_ATCC_1015_ATCC_1015_GCA_000230395.2	SAT-KS-AT-PT-xCP-xCP-Te	MEGPSRVYLFGDQTSDIEAGLRRLLQAKNSTIVQSFFQQCFHAIRQEIAKLPPSHRKLFPRFTSIVDLLSRSRESGPSPVLESALTCIYQLGCFIHFYGDLGHDYPTPSNSHLVGLCTGVLSCTAVSCARNVGELIPAAVESVVIALRLGICVFRVRELVDSADSESTCWSALVSGISEAEASHLIDEYSSKKATPPSSKPYISAVSSNGVTVSAPPTVLDEFVETCISKNYKPVKAPIHGPYHAPHLYDDKDIDRILQQSSALEGLTGCSPVIPIISSNTGKPIKAKSIKDLFKVALEEILLRRLCWDKVTESCTSVCKTGTNHSCKLFPISSSATQSLFTVLKKAGVSISLETGVGEIATNPEMRNLTGKAENSKIAIIGMSGRFPDSDGTESFWNL…
Eurotiomycetes	Aspergillus_niger_ATCC_1015_ATCC_1015_GCA_000230395.2	SAT-KS-AT-PT-xCP-xCP-Te	METVAEVFLFGDQTVVFESTLHSLLHVKDNAVLTDFFDRVGFQLRLHVGNLPLHQQEWFPYFTTLIDLLAQHENCYAAPALKLPLLCATELGQFIRHYGQAGRTYPAPESTFLIGACTGAFAAAAVATSLTLAELVPAAVEAVTVAFRTALRSLILRSDLVPTAEETPISWSAIVGVSETEATSAIQGFNAEKGLPPVYRLYLSSVSRTNVSISGPPHLLGQFLSSYAWKHSFLPIELPYHASHLFRAADADVIVDDIHDSSLLKYTLRTKVISAVSGEIITASDLRSLLLRAVQEALCEPLQWNRITASLSQELKQGQFTDCVINQVSSRSGTLLSSALSQEAFLQVKIVQSIGDASVHSALSSPTGKFSQSSIAIIGFSGRFPESSSNEEFWEMLLA…
Eurotiomycetes	Aspergillus_niger_ATCC_1015_ATCC_1015_GCA_000230395.2	SAT-KS-AT-xCP-MT-Red	MVTTTRATNPTNTLLLFGPQALSFSTATFADIHARVVQTSENAWIKQTITSLPGLWDALVKEFPQYGALEGKQLLRDLDRWFETGTMEHAEPHLPNILLSPMVVITQLTEYVDYLKTMPHAADQQTETVGFCTGLLTALAASLAPDIKGIRQYGAIAIKLAMIIGGVVDVQDITSPNGPSKSLAVAWDSAETQDRLNQIIDQSPEAYISVEYDHNRATITTAARSISSLQQRLRNAGLIASQIGLRGRFHCACYEKDIEALSKFCDSVPSLCLPDAAVLALPTRSNDAGSFILSGKLHHCALRSILLDTSHWYQTLEVVRQSFLKSPSSMVVSFGPERCIPPSILKGLSSIVTTAAEYQPSYLHRDPELCNPNEIAVIGMSCKVAGADDVDEFWDLLCK…
Eurotiomycetes	Aspergillus_novofumigatus_IBT_16806_IBT_16806_GCA_002847465.1	SAT-KS-AT-DH-xCP-xCP	MDSALPSTVVCGSQTHPPSRECLKRIQSNLRDPKLKELAKAVDDLPQFWSHLVEVKPVLSQVSDEPLKRLKDWAKDESFLEIPEGLPNILLAPLTVIIHLVQYLRFAHSFDADDSQKDIHRRILQSTCKGGFQGLCTGFLSAAALACSRTERDLWCNATVALRLATCVGAYVDLDRLTYDSADVHTCMIIHWEDNCGKDRVTEVLKGYPGVYTSVELDDKSVTVTAKESQVSSLRADLAARDAKLTKIPIHGRYHSRTHAEILQDLLDICSNEESLRFPIINTPLVPLRNNTTGGLIISGENLHELALKCVLTEPADWYSTMAETVSSLMSRPETNEQPLILELGLVSCLPRSLTASANLRVFTPPLNSTVLPKERGSSAKDEYHFVYPEHSIAVIGAA…
Eurotiomycetes	Aspergillus_novofumigatus_IBT_16806_IBT_16806_GCA_002847465.1	SAT-KS-AT-PT-xCP	MDWTTETPNTEPSLVTATPSTTESLVDPAKMKVGYFGNEFPHDDLHDLSRRLYNWSKDRQHTLLATFINEATAAVRQEVRLLPATLRTLIPPFETIFSLVSHADLRHGPLGGCIDGMLLCAVQLATFIGYYEDSTEDTFHWHNADACLAGLGTGLLSTVAVSVSPTLADMPVTGAEVVRMAFRLGILVHEVSRILQAPTSDGGPGDSWAYVVPDAVADDVQSELDAFHDAKKTPESSKVFISALSRTSVTISGPPTRLKDLFLVSDYFRDRRFVPLPVYGGLCHASHVYTKEHVDSIVNTESSSLVSLDSRLAPRVPIFATSNGKPYSAKTVSGLFRNIVEELLTQRIEWDNVIEGVIQHAKCTAVSEALVLTFRTSLPARDLVEALNSESLPFKGRTQ…
Eurotiomycetes	Aspergillus_novofumigatus_IBT_16806_IBT_16806_GCA_002847465.1	SAT-KS-AT-PT-xCP	MATPRAQTVWFGNEFPSDDLKDLFRRLHQHSKDRRFRLLSVFLDESTAILKEEVANLPQQLQELVPHFNTACTLAEVDFRQGALGAAMESALLTILELGMLIGNYEAEDIEWDLDPSETILAGLSIGILAGAAVSLSSSLADVAKVGAESVRVSFRLGVYVADISTKLEAPQSDGTLQSWAHVVTGMSHEAVQEELSQFNAVTQNPELTKVFVSAADKTSVSVSGPPSRVKAAFQHSPSLRYSKSFALPVYDGLCHAPHLYSLDDIEIVINSAKSVIPSSRPVRLPLISSQTGKPFVAKTAGELFLEIGTELLTGTIYVDNVTAGILEHVKLKEPTGSYRIDSFRMSQVLNGILTAIETDFPALGRVRRDLVSWVYGDYGARRPSSYAASKLAIVGMAC…
Eurotiomycetes	Aspergillus_novofumigatus_IBT_16806_IBT_16806_GCA_002847465.1	SAT-KS-AT-PT-xCP-Te	MESNHPTVLLFGDVTDSWVDGIDHVYSQAATKPWLQSFLGDLFSVLKAETRAMDRVLQDSLRDCSSFQELAERYRHTGDEFGMAHAMLIYAIRAAVLLEATTREPQLLDPNRPRPELIGISGGLFSAAVVSISTNFQTLYDACLEAGRVWARLCNLTLVRSRAMEERPGTWGWAVLGIPAEELDKALEQFQNVMGVPSAKRARVGVNGDRWSTVIGPPSILELVMNGCPALKNLPKNALDIHALQHTLSISEADIDYIVGNSPVLDTPLPPGYRIWGLDEDRPEAAYSNWRHLLRASVSQTLSRPLNIVQAVSKLNANLGTSRHVNVKIMGPSSHAVYLVKALQTAGREVSIHDDLSAKPPSSDSRNGIAIIGMAGKGPGSDNLEEFWNVILKGLDLHK…
Eurotiomycetes	Aspergillus_novofumigatus_IBT_16806_IBT_16806_GCA_002847465.1	SAT-KS-AT-PT-xCP-xCP	MEDLRRIYLFGDQTISCDEGLRNLLQAKNHTIVASFIERCFHALRQEITRLPPSQRTLFPRFTSIADLLARHRESGTNPALGSALTCIYQLGCFIDYHGDRGHPYPSSDDGLLGSCTGMLSCAAVSSCKNVGELLPLAVEVVTLTIHLGLCVMRVREMVDSTESSSGSWSILVSEINEADAAILISNFVKKRVRNYPSSQPYISAVGSKGLTISAPPDILDKFIEEGLPKEYKHFKAPGVSGPYHAPHLYNDREIRDILSFCPDDVISRHTPRVPLVSSNTGKLVQVKSMRDLLKVALEEILLRKICWDKVTESCLSIVQAANDKPWRILPIASNATQGLVTALQRMGNCQVEVDTGVGAPQMDPTAPNATGNASRSKIAIIGMSGRFPEADGVEAFWD…
Eurotiomycetes	Aspergillus_novofumigatus_IBT_16806_IBT_16806_GCA_002847465.1	SAT-KS-AT-PT-xCP-xCP-Te	MHRPLQVERLNLVVLGDQTNNVSPLLKKLLLSAPHSVAQSEFIRDASAALRAQSDRLRPFQREHLPGFKSIHDLARIYEKSNGLLQIFRYFEGRGRRPEQNEHIAVVGLCTGSLVAAAYATSASLDDLKLLAVPTVSMAFQMGLQAATASSMLHEQGNPLGSWSIAIPKMTEDEALSALKIYDAGGHLSLRHRCFVSAVGLKSVTISGSPPALSRFAESLTASQPSRKIIWLPIFAGYHASHIHTVLDFPSFLSRCGIDADLLSSFKSIKTLLSPLTGEPVDSNSALDLFKTVVHHTLQAPLRLDLIVDRCASLIRENTIASVRIDAVGPTPVADSLAAALRNRTSANISTRELVVLEPGVDQYKPSAAFSQAPLAIVGMSGRFPGAESAEALWSLLES…
Eurotiomycetes	Aspergillus_novofumigatus_IBT_16806_IBT_16806_GCA_002847465.1	SAT-KS-AT-PT-xCP-xCP-Te	MAGPLKLYVFGDEAGDFAEPLQRLCERRKEVLFLHFLEELNKVLRDEIRRQPRDVRVQIPEFTDVLDLVRRYRYSGSRNQILETTLTCVCQLATVISFFGNETSQYFAPSDSVFAGFCTGLLVAFRIGVKVNGAAQRLSKHGDAAAARSWTTLIIGAQKEASIAELAQFNESKGIPKANQAYISAMSKDVVSISGPPETVASLLQQSEYLQKFKTVSLDIFAPFHAPHLYSDDDVAEVLRPFSDKDAKKKLFIPVISGAGTRYSPDLDVDTLMVDAVRDILIRPLLFENVMNTVTETTTASPRKDCQIFSVGPSQAIKSLASTLRADASLKVTIKGQLHTENPDYEPLNGAQKIAIVGMAGRFPNSDDLESFWSTLQQGLDLHRRVPPDRFDIDAHYDP…
Eurotiomycetes	Aspergillus_novofumigatus_IBT_16806_IBT_16806_GCA_002847465.1	SAT-KS-AT-xCP-MT	MDPDSSNLSLHLPRILCFHGGGSNATIFRFQCRVLRAHLRSVFRLCFVEAPFESEPGPDVTLVYRDYGPFRRWICWKEEHPRYPPADAVRAIETAIQTVIEEDNSKGATGEFVGVLGFSQGARLAASLLYRQQLQAEAGGKLVPLQTSFQFGVLLAGRGPLVILDSNRQATSSPLAAGRDVLGAACVDDHCQIGNRRPILRVPTLHVHGLQDEATVVPLIVVAALIWHTCCTYMKLYGVPGPFWAKLTNFQRLHWVKTGRAQEYHQQMHEKYGPCVRLGPDMVSISDPSKFYRAFMPYTPSGLLPSIFTTQDEATHKQMKSHIAPLYSLSHTVLFEGTFNELLQKLFNQLDARFADSGVSFDLGDWLRYFAFEVMGLMTFSKEYGFLENGTDVRGILAD…
Eurotiomycetes	Aspergillus_ochraceoroseus_IBT_24754_IBT_24754_GCA_002846915.2	SAT-KS-AT-PT-xCP	MSIYTPPSDSQEEYSKMKLLYFSNEFPKDDLQDLYRHLHNHSKDRQHPLLARFIEEATLALRDEVRQISMSLKALMPAFETVLNLVDYPDLRKGPLCGSIEGVLLCVLEIGTLIGYYETHPDRFDLHSSPTYLSGLDIPSTGAEVVRIAFRLGVLVDDISQNLEPRDVSGSPDTWASVVPGARPEDVQAELDEIHAREKTPVPSKIFMSAWGQSSVTISGPPSRIKRILRLSEFFRRHKVVSLPVFGGLCHAKHIYSLKHVKEIVGTSSIEALDARCSPTIPIFQTSTGQQFIASTAKDLFENIVEELLTQPILWDNVIQAVVDQAYSTSATNCEIQVFRNSVPINELRATVISKLQGFEVSTEEIIPWVLNSKKQQDPRGPKQSKLAIIGMSCRMPGG…
Eurotiomycetes	Aspergillus_ochraceoroseus_IBT_24754_IBT_24754_GCA_002846915.2	SAT-KS-AT-PT-xCP-xCP-Te	MMSQPYPTRLFLFGDQTYDFAPELRSLLAVRNNPILTAFLDQSHYVVRAQMIQKLPPKEHKDARAGSLAELLQKYVDGRLPSAFQTALSCITQLGSFMRQFDDASIPYPRFNDSYVLGVCTGSLAAAAVSCSTSLSDLLPIAVQTVLVAFRLGLCAQEVRDRLEISFENRTKPWSVVSDLSRQEVAAALDRFSEEGMLSTTRKPWITATSAKTTTISGSPEILARLAADPSLERGKRWREIPIYVPAHNPHLFTARDVDSILETTDPHPWSDYGAKIPFVSAVTGKLVWIRNYRDLLQLSLSQCLIEPIRWDLVETELPRLFESRKGIESVSIVSFTTVLTKSLSTALTSEGITADIQTTADRIPEACSHRPGAGRGKLAIVSMSGRFPEAPSTDSFWD…
Eurotiomycetes	Aspergillus_ochraceoroseus_IBT_24754_IBT_24754_GCA_002846915.2	SAT-KS-AT-PT-xCP-xCP-Te	MEGKSHHIYLFGDQTGDFENGLRGLLQAKNHPVVSSFFQRCYHAVRQEIAALPPSERSRFPRFTSIVDLLARHCESRGNPAIESALTCIYQLGCFINYHGDLGHAYPSSSKSHIIGLCTGLLSCAAVSSARNIGELLQPAVAVVVVALRLGLCVLRVRGLVDQDPSASGSWAALVSGINEQEGRELITKFCQQRVTPPSSQPYISAVCSNTLTISGPPKVLDELVQTTLAKESRVTRASIHGPYHAAHLYDERDVERILETCDNDAVLSLKPHIPVLSSNTGEPIVAHSMNDFLKAALEEILVRQLCWDRVTDACAAVVLKSANNRTTTKIFPVATTATQSLFTALRKSGLSNVQADGGMGGEPAPASSQGRNNNNNDTGRAELSKIAIIGMSGRFPEA…
Eurotiomycetes	Aspergillus_ochraceoroseus_IBT_24754_IBT_24754_GCA_002846915.2	SAT-KS-AT-xCP-MT	MGSAVPFPAMLVFGPQCSLPQGEAAEDLRQVLVSHPQLEGLRAAVNGLPALWHDLTQADPELRHVPGDTYLRDLVQWMETGDLTCFDHEFNTLSFPLMTLLQIALYVRYLALLQEQHPYERVRKSLEYSGVHGFCLGFLSAAAVAQAETEADLAVSAAVSIRLAVCVGAYVDKDSVFAQPVRLTASMAVRWRNEDTTREEVDQLLQKFPQTYVSCVNDESCITVTVPIEQKEQVTNTLQVNGLRVRPVDIQGRFHTATHAYAITKLQEFCCTRQDMQFPALKGPTIPLRSNFTGEIVPGPSLHELALESLLGQTANWYKTIQGAINDLPDVNRTIVFAGFGDSPIPFSLLREKSTHIISLWNKPAAPLPPKNVPPHQTQLADDMTLYTSPTADSVLQGT…
Eurotiomycetes	Aspergillus_ochraceus_AO.MF010_GCA_005784425.1	KR-KS-AT-DH-xCP-xCP-Te	MSTVLVSSQPSQASGTETAKAADSVKLFSLVKNHDGISQLGYAPLHGLARVLKMEIPDLFGGLVEVKEEELRFPLSAITSARGFDIIRVYEDEEEGRPQTAVLQPLSLPDGEEKQRQAMALDSESTYLITGGTSGIGLETASWMVEQGARHLILLSRRGVELEARDIRANTLLARIAEMEAPGAKVHVLAIDLSLLGADSTLRQAIDKIPAPAVKGVVHAAGTAGYHTLKGCTQADIENVFAPKVRGALSLDAVFPPATLDFFLLVSSIGQLVGFPGQLSYAPANAFLDGLAVQRRREGDNCTSVQWTTWRGVGLSVQSKSATRMINKGMKDRGIEDISKEEALEAWGKILALRIDQVAVVRALELGSDEPLRHPILREITPRKKPKRYSDYPKQAVAV…
Eurotiomycetes	Aspergillus_ochraceus_AO.MF010_GCA_005784425.1	SAT-KS-AT-PT-xCP-xCP-Te	MVDQLHVYLFGDQTFEVSTKLPPLLHSKTSPLLEAFFEQAYHALRSEIAQLPARDRDTYPRFSSIAELLAWRNRQERLHQPIETTLTCIYQLAQFISEHDGFGRAYPSPKETCVSGLCTGALAAAAVSCCNTVSELLPVAVQTVVVALRTGLCALNAAKAVDQSEGNWSIVLVGLSQQEVSDRLQEFSRSHRLPITSQPYVSAYAENWLTISGPPRVLGLLRDLENFTTAHPRTIPVFAPYHAPHLFTKEDIKAILSTTPEGIWGRYSAVLRAISSTTGQLIEGDNLRRRLEAALVQILLEPVQWHQLTQGVASVLSSSGASQFTISPVGTNADTALGVALNSTAGSSNGTIPERVPRPTQVETDQSKPTGSTGGSKIAIIGMSGRYPSAENNEEFWDL…
Eurotiomycetes	Aspergillus_ochraceus_AO.MF010_GCA_005784425.1	SAT-KS-AT-PT-xCP-xCP-Te	MERSGTILFFGDTSTPVTSALLQLLESERKDTLLSKFLTLSRTVLRDGIEQLPFHVRQEARRFAELYDFTDPQHAKLASLRVLSPALLVITQLGQFISWYETHPHVDYPSAQNSVYIGLCVGQISAAAISLSTNLIELIPLAVEAVRLTVNLGSLVFTVRDDLEYDADGAAWALMVENEIINKQLLELSSEALGLPSRKQPYVSARFENTTTIQGPPTTLARLKQFLASAKISTTNLSGRPVAIYAPYHASHLYTEADVLKPIESSASIQTVYNTEIWSKDQPAILSTSSGSIIPLKSRQGLLSAVLSDILVHPIEWSSIINGAISSVLSLGRTKWETQCFGPLHSQKLLVAAISSGAEVEVTLADTSIQAQKGHGRNTANTPIAIVGMAGRFPDADSV…
Eurotiomycetes	Aspergillus_ochraceus_AO.MF010_GCA_005784425.1	SAT-KS-AT-PT-xCP-xCP-Te	MQANVFVFGDQTVPFESTLHDLLQVKNNSILIDFFEKAGYHLRRYVASLPVYQQEWFPCFTTLVDLFAQHDQSHACPALKFAFVVTTQIGLFIKHFGDGASPYPTDNTYVIGACTGCFAAAAISTSRTLTELVPAAVEAILVALQTAVRALALRDDLTSLDEEHRAWSAVVAVDESVAEKLVQRFNAEKTLPRVMQLGGDAGGFGFHHPSLQGYAQRLPIVSAASGVILESQRFEDLLHGAVTETLTHPIQWNRLVSSLSRELSVHDFTDCTLYCVQDRGSFLASSLAQQLPSLTVTTTSINEGNLPPPPENEPTGRFSDSKVAIIGYSGRFPDSASNEEFWSLLLAGRDAHRTIPEDRFDWEEHYDATGKKKNTSRIKYGCFIKEPGVFDARFFNMSA…
Eurotiomycetes	Aspergillus_ochraceus_AO.MF010_GCA_005784425.1	SAT-KS-AT-xCP-MT-Red	MSSKLSPPKGSKTVLVFGCQCLTFSAEDFLALRETISSSPEYAWALEVLAELPVYYRTATHHLPKLTTIHGYRQLRSLHEWFRRGDIAGETFPPPYIQLAPLLMLTHFTQYEQYLRLTSPGYRDHGRIHAEESEVGEIVGFCIGFLSAAVASAADSREKFAEYASVAVRLSMLLGAIGDAQEAEEEWTSLATVWKGEDMEGELEEVLKRFPEAYITVRYDDNRATIMTPRRNLAQLQESLQSVSFGCSQVDINGRYHWSGHKDTVRSLLAMCSTDPSLQLPDASQLVLPTRANTGGQPVASGPLTTLVLESILSQQCDWQRTFSAVYESQLKISDSIIVEFGQERCVPPTFMRNLRGRVIHFADLDLDLTSRLSPLNCNPRTYDTDIAVIGMACRVAGA…
Eurotiomycetes	Aspergillus_ochraceus_DY1_2022_GCA_026108165.1	A-xCP-KS-AT-xCP	MVPEDDQNLTDDPSKLGHNVVSLFDQTQTRYSPKAAIVCGEHTLTYGALASDSDRLACLLLSRGISRGHVVALALDRTPDLIMFILGVLKAGATYVPVDPALPPERVNQMLDDEALRLVIVSPVSTKGGAGTGRYDYGNKAVCCTTSELQDQMRYQADKRPAVDIQPDDIAYILYTSGSTGKPKGVEIHHAAICNYALSVHQRPGCTDQDRVLFKSTISFDMAAFEIYVPLLCGATVVQAQAHDIRDPRALMHLIDRHSVTFSVATPTILQMMLDSGWCGTPGFSKLVTGGEALSPRLAERLTACVEEVWNLYGPTETTASVAAWKVQVGEDILIGTPNPNTRLYVLDADLQPVPVGSTGELYISGAGVARGYRNNPERTKAAFLPDPFWEGHTMYKSG…
Eurotiomycetes	Aspergillus_ochraceus_DY1_2022_GCA_026108165.1	SAT-KS-AT-PT-xCP	MSAPTKLVFFGNEFPNDDLKALFRGLHRHGKDRRFRQLATFLEESTRVLQNEVAQLPEPLKKLVPHFENLMPLTEVDFRQGPLGAAMESALLTILELGMFIGHYEAEERVWDLSADRTTLAGLSIGLLAAAGVALSTHLAEVVQNGAECVRVSFRLGVYVHDISRKLEAPQADGSLLSWAHVVTGETASDLQEELSRYNTETGTPELLKVFISAADKTSVSVSGPPSRIRAAFRASQRLRYSKSLALPVYDGLCHAAHLYDEETIHRVLHPDGSVIPTSRPVQLALLSSRSGQPFEATTAAELFRAISTELLTGTIFLDNITAGILDRTERCADATQCQIETYRTSLVFKGLLKALEACFPDRTISTTDLIPWVFQDYGAHQPKSCADSKLAIVGMACR…
Eurotiomycetes	Aspergillus_ochraceus_DY1_2022_GCA_026108165.1	SAT-KS-AT-PT-xCP	MLADMCVGVYKAAINKFPIDDLPDLFRRLRLCSQSPRHVVLRRFLEEATRVVREEIYRLPPELRSLIPPFQSILDLAQNYHWHKGPLCGIFECIFLCLVQLGLFVGNYEIRPHEFSFNTQESLFTGLGLGFLAATAVVASPSLLDLPITAAEVVRIAMRAGILLYQKSQDLEQLSLDSSLESWTTVVRGLDESIVRGELEKFNKSMETPPSSRIYISVVEPDGSVFISGPPSGLREFFNKSGKVQSAPRAPLPVYGGPCHAAHLYDRTHTEWVVSKVNPEIASRRLSGHPLVLSMGDGQPLAGENARDLFESATYVLLTSIIRWDSVLAAVKKLPHWKQDTKLQLETFRPSSPAVHGLISAVQSEYPDCTVSVDDLGDWIIDNSLEPPTIPIDSRIAVV…
Eurotiomycetes	Aspergillus_ochraceus_DY1_2022_GCA_026108165.1	SAT-KS-AT-PT-xCP-xCP-Te	MEGPSRVYLFGDQTSDIEAGLRRLLQAKNSTIVQSFFQQCFHAIRQEIAKLPPSHRKLFPRFTSIVDLLSRSRESGPSPVLESALTCIYQLGCFIHFYGDLGHDYPTPSNSHLVGLCTGVLSCTAVSCARNVGELIPAAVESVVIALRLGICVFRVRELVDSADSESTCWSALVSGISEAEASHLIDEYSSKKATPPSSKPYISAVSSNGVTVSAPPTVLDEFVETCISKNYKPVKAPIHGPYHAPHLYDDKDIDRILQQSSALEGLTGCSPVIPIISSNTGKPIKAKSIKDLFKVALEEILLRRLCWDKVTESCTSVCKTGTNHSCKLFPISSSATQSLFTVLKKAGVSISLETGVGEIATNPEMRNLTGKAENSKIAIIGMSGRFPDSDGTESFWNL…
Eurotiomycetes	Aspergillus_ochraceus_DY1_2022_GCA_026108165.1	SAT-KS-AT-PT-xCP-xCP-Te	METVAEVFLFGDQTVVFESTLHSLLHVKDNAVLTDFFDRVGFQLRLHVGNLPLHQQEWFPYFTTLIDLLAQHENCYAAPALKLPLLCATELGQFIRHYGQAGRTYPAPESTFLIGACTGAFAAAAVATSLTLAELVPAAVEAVTVAFRTALRSLILRSDLVPTAEETPISWSAIVGVSETEATSAIQGFNAEKGLPPVYRLYLSSVSRTNVSISGPPHLLGQFLSSYAWKHSFLPIELPYHASHLFRAADADVIVDDIHDSSLLKYTLRTKVISAVSGEIITASDLRSLLLRAVQEALCEPLQWNRITASLSQELKQGQFTDCVINQVSSRSGTLLSSALSQEAFLQVKIVQSIGDASVHSALSSPTGKFSQSSIAIIGFSGRFPESSSNEEFWEMLLA…
Eurotiomycetes	Aspergillus_ochraceus_DY1_2022_GCA_026108165.1	SAT-KS-AT-xCP-MT-Red	MVTTTRATNPTNTLLLFGPQALSFSTATFADIHARVVQTSENAWIKQTITSLPGLWDALVKEFPQYGALEGKQLLRDLDRWFETGTMEHAEPHLPNILLSPMVVITQLTEYVDYLKTMPHAADQQTETVGFCTGLLTALAASLAPDIKGIRQYGAIAIKLAMIIGGVVDVQDITSPNGPSKSLAVAWDSAETQDRLNQIIDQSPEAYISVEYDHNRPTITTAARSISSLQQRLRNAGLIASQIGLRGRFHCACYEKDIEALSKFCDSVPSLCLPDAAVLALPTRSNDAGSFILSGKLHHCALRSILLDTSHWYQTLEVVRQSFLKSPSSMVVSFGPERCIPPSILKGLSSIVTTAAEYQPSYLHRDPELCNPNEIAVIGMSCKVAGADDVDEFWDLLCK…
Eurotiomycetes	Aspergillus_oryzae_14160_GCA_019097755.1	KR-KS-AT-xCP-xCP-MT	MTINEMIHRLDWMSAELSTEPLNFRKVVFLAADEDSRERLSRYQAQLASEGLTTVFIGHATEITPLLTPDTIVVHIPHVAREKSGVYEAVTKSCTSLIAAAQVLYHHNQDSRDRTSRLFSLISRDSGTDGLEYAPLYGLARVMKTEMAEGFGGLFDEDQGHFPLSAFKYAQGFDVVRICQGVPQTASLQPFQDQLNDQKQLQLRENSTYLITGGTRGIGLEIATWLGERGAHNLLLVSHGGLTPALGRNAKNADHEKLVSRIAKLKDMGISVHVLSIDFGKPEAETLLRQAIDELNIPRIKGVVHAAGVAGFHTLQHCSPSDVADVLAPKVRGSLALDTLFPPGTLDFFFFMSSIGQLIGFPGQLSYAPANGFMDGLAAHRRRHGDNSMSILWTAWRGV…
Eurotiomycetes	Aspergillus_oryzae_14160_GCA_019097755.1	SAT-KS-AT-PT-xCP	MRIFHFSNNFPPDDLADLFRRLRLHSKCPNHVILARVLEEVTDVVREEITELSAELRSLLPPFQSILDLAESFNWHQGPLSGTFECVFLVLMPVCLFVGHYESRPDEFVFRRDTSLFTGLGLGFLAATAIVASPSLCSVPVTVAEVVRMAMRTGLLIYQRSQDLEPQSLDGALESWTSIVKGMGEVAVREGIDEYNSSTDTPQPSSIYISVVEPDGSVFINGPPSRLRKFFSTSGKVQSAAHAPLPVYGGPCHAPHLYDHSHSLWAVKKCRAKVLSRDLSHAAYLLSMADGNPLKADTVLELFESATYILLTSIIRWGDVVNAITASSPLLEKDMKLQVEILRPSPVVDGLVSAIQKSHPGCSAYVVDLGEWIFDDTHISPHGAHEKIAVIGMSCRLPG…
Eurotiomycetes	Aspergillus_oryzae_14160_GCA_019097755.1	SAT-KS-AT-PT-xCP	MIENTTITPSESRSPSPSHANVDMDANIPEEFILFSHELPSGEIQDLIRRLHRYSMLPGYPHLARFLQSCALILRTEVQKLPRPLRDSVPPFHNVVTLASHWDDFKSSSLNGAWDGAFLCIYEIAMLIGHHETLDTSYRRPACLVGISVGLFSAAVVAVSESLSDLVSYGAESVRTAFAFCVHVQRVSQTLEPTVTEQATSVSWATVVIGVPVEIIREELDRFNHQEELQRTGTNTMPLTGVSISHVDNTSVGITGPPTRLKQLFRESEILRSSRHSELPISGGLCHVPNVYDYDDVRSILATAEVWERWGTRATQVPLISPFTGSPYQCSDAYHLIEAICTEALTKPLFFDKVAKGVVTQLSGGQRPDMQSCQILHYRASVMSDTIVADVAEDLSTRD…
Eurotiomycetes	Aspergillus_oryzae_14160_GCA_019097755.1	SAT-KS-AT-PT-xCP-Te	MHQIPVFAGLGSDALFSERTLGTAAEDARTSEGQIILRACHDIFVKEITSVIHSQRLPSDIKLEDFVEPESLIRPQACYQRNSIIQHVSLYTIQLLRYLRYSTEKPGVILGVAGFCAGLLPGAALATSRNTIELLSRGQDFFYVALHVGIRIESYKQVMMGKETCPPHLPCSLVVDGITAQHARELLEEHNRRSPASYIYLSAINSDTCVTLSGRGDHLQQFSQSSVPSQCKIRPTNIFSLYHDRHQLEGVRRDILQDLRNNILLFSTPLHLIAPLFSNIDGKPIDSGQLATLEELCEKLLEMMILEPVNWVAVEDNVLAAIKQPATAVDASFEILNFGPGYGISGARYTLPDNVNIVAASIVEPRPSLQDTTGMLSSNDIAIVGMGVDLPGASNTDAL…
Eurotiomycetes	Aspergillus_oryzae_14160_GCA_019097755.1	SAT-KS-AT-PT-xCP-Te	MVVEERKQIIVFGDLTCDSVAGLRTLVTVKDNPLLISFFERVTSGLREEIGLLPFSQRQRFIRFTTFEELLARVQRSTCPHPALEKALACTYQLACFIRQYTSPGHKYPSTQQTCLVGLCTGLLSAAAVGCCQSITDLLPLATHTVLIAFRAGLFVADVRDRLEPQTGAPLAWSVLIPGLDGDTASLTLQKYNEEKGLPATSAPYISTYANTGVTLSGLPSALNDLLDSSCLPKNRALTIPIYAPYHASHLYGQKDIESILRKASATEFASYQCQFSILSSITGQSIQVDTFGALIDYALNAILREPLRLDRIVSSLGEALLSDSPIRGCTILPIATVIGQSLAAALRKHGAPDITVDPCMNSSIAVRDDRTSTTGHLGHSKLAIIGYSGRFPDANNNE…
Eurotiomycetes	Aspergillus_oryzae_14160_GCA_019097755.1	SAT-KS-AT-PT-xCP-xCP-Te	MEGPRGVYLFGDQTSDFDAGLRRLLQVKNNTIVASFFQRCFHALRQEIARLSPSERKIFPRFTSIVDLLARHRESDPNPALESALTCIYQLGCFINYYGDLGNVYPSASDCHIVGLCAGLLSSAAVSCSNNVGELLPAAVEAVVVALRLGLCVLKVRELVSSDQASSTSWSVLISGISEKDASQLIGEFTAERAIPPSSKPYISAVGYNSITISAPPKVLDDLIDSRLSKSHKPVRAQIHGPYHAAHLYDGRDVDRIIESCHNEVVSNYTPRIPVLSSTTGQPIEAKHMKDLLKAALEEILLRQLCWEKVTDACYSILKTARHQPCKLFPISSTATQSLFTALTKAGITDIEVENGLGDVPTNPKDNLTISGRADCSKIAIIGMSGRFPEADGTESFWD…
Eurotiomycetes	Aspergillus_oryzae_14160_GCA_019097755.1	SAT-KS-AT-PT-xCP-xCP-Te	MVNIYIFGDQTVRVDDAVHKLLHVKNNPILKSFLDGSFAAIRKQIFLLPANERTSLPDAHTLPLLLEAVRRGRRHVALESALVCLCEIGQYIALLQTTDLCHPPTGSILVGFCTGSLAAAAVSCVRTSIDLLTLGIEAVVVAFRVGMHVARRANALGGDGGSQWKPWSLAVTDGSESETEKILEEFTRDEVSGVHVANRHDAYILAKGLPAIMKPYVSAAGSNTLTISGTPRVLEALKASPHLRGTKSLPVSIYAPYHAAHLYNEADVESIFACKPVESALFHRELRTPLISCATGTVLKEKTFGDLLRALVMEILTCQIRFDKVEESIVQHTPGATAQLIPIHTNIAPRMKTSLTQVGLQVECFKAIANQEPAAEALSESPSNDSSKIAIIGFSGRFP…
Eurotiomycetes	Aspergillus_oryzae_14160_GCA_019097755.1	SAT-KS-AT-xCP-MT-Red	MLNQLEPPPGGKTVLIFGCQCLSFNFDDFHRLRATVLETPEHRWIQDVLSELPVYYRTASTTYVQKLKNIPGTQQLRNLAEWFRTGQVPTDSFPLPYIQLAPLLVITHFTEYWQYLRIRHHKGPTSVKESSAESPVVEIVGFCIGFLSAAVVSAARNQEQLSKYAAVALRLATLMGALGDAQEREEEYTSLATVWKAAELENRLPLVLEAFPESYVTVRFDTNRVTIMTPRRTIKQLENELQSAGFNTTQVEFNGRYHWAGHEDTLHALGRMCDSDPALQLPDTSQSVVPTRPNIPMDTPPKGPLHELVLWSILAKQCQWLDTFSKVYQAHLEDTASLIIEFGPERCIPPTYMRKLQGRTVHFADLDLNTLSRTPPLYQTPRSYDSDIAVVGIACRVAG…
Eurotiomycetes	Aspergillus_oryzae_14160_GCA_019097755.1	SAT-KS-AT-xCP-MT-Red	MVNSGSNIKSESLTLVFGPQDPNLDNTFLQSLRTTLLETPELQWILETLTQLPQEWQKISDAHSELAAFQGQRYLQLLNEWVRRGTLPSNLFPLPNILVTPLVVTTQLTQYTKFITQLNPGITSNDSLQGALKLDTETAGLCTGLISSAAVAISGTLAELQKHGAAAIRIATAIGALVDAGDSEREDGDKWESLAVGWTAHGTESKLESIVDGSPEAYVSVISEARLATLTVLKADTPELLEKLKAAGVIFTKTALRGPFHCGKRKDQAASLLQLFDSDPSFQFPHASQLAFSTRSADSGKFRIEDKLHHEAARAMLTDKADWHKLFTALHESTSTRPSLTICFGSQRFVPQWFLRKLGPKLAYAADLDANPGQLPPALGALLGPIEDDAIAVVGMACH…
Eurotiomycetes	Aspergillus_oryzae_3.042_GCA_022023715.1	KR-KS-AT-xCP-xCP-MT-Te	MTINEMIHRLDWMSAELSTEPLNFRKVVFLAADEDSRERLSRYQAQLASEGLTTVFIGHATEITPLLTPDTIVVHIPHVAREKSGVYEAVTKSCTSLIAAAQVLYHHNQDSRDRTSRLFSLISRDSGTDGLEYAPLYGLARVMKTEMAEGFGGLFDEDQGHFPLSAFKYAQGFDVVRICQGVPQTASLQPFQDQLNDQKQLQLRENSTYLITGGTRGIGLEIATWLGERGAHNLLLVSRGGLTPALGRNAKNADHEKLVSRIAKLKDMGISVHVLSIDFGKPEAETLLRQAIDELNIPRIKGVVHAAGVAGFHTLQHCSPSDVADVLAPKVRGSLALDTLFPPGTLDFFFFMSSIGQLIGFPGQLSYAPANGFMDGLAAHRRRHGDNSMSILWTAWRGV…
Eurotiomycetes	Aspergillus_oryzae_3.042_GCA_022023715.1	SAT-KS-AT-PT-xCP	MIENTTITPSESRSPSPSHANVDMDANIPEEFILFSHELPSGEIQDLIRRLHRYSMLPGYPHLARFLQNCALVLRTEVQKLPRPLRDSVPPFHDVVTLASHWDDFKSSSLSGAWDGAFLCIYEIAMLIGHHETLNTSYRRPACLVGISVGLFSAAAVAVSESLSDLVSYGAESVRTAFAFCVHVQRVSQTLEPTVTEQATSVSWATVVIGVPVEIIREELDRFNHQEELQRTGTNTMPLTGVSISHVDNTSVGITGPPTRLKQLFRESEILRSSRHSELPISGGLCHVPNVYDYDDVRSILATAEVWERWGTRATQVPLISPFTGSPFQCSDAYHLIEAICTEALTKPLFFDEVANGVVTQLSGGQRPDMQSCQILHYRASVMSDTIVADVAEDLSTRD…
Eurotiomycetes	Aspergillus_oryzae_3.042_GCA_022023715.1	SAT-KS-AT-PT-xCP	MRIFHFSNKFPPDDLADLFRRLRLHSKCPNHVILARVLEEVTDVVREEITELPAELRSLLPLFQSILDLAESFNWHQGPLSGTFECVFLVLMPVCLFVGHYESRPDEFVFRRDTSLFTGLGLGFLAATAIVASPSLCSVPVTVAEVVRMAMRTGLLIYQRSQDLEPQSLDGALESWTSIVKGMGEVAVREGIDEYNSSTDTPQPSSIYISVVEPDGSVFINGPPSRLRKFFSTSGKVQSAAHAPLPVYGGPCHAPHLYDHSHSLWAVKKCRAKVLSRDLSHAAYLLSMADGNPLKADTVLELFESATYILLTSIIRWGDVVNAITASSPLLEKDMKLQVEILRPSPVVDGLVSAIQKSHPGCSAYVVDLGEWIFDDTHISPHGAHEKIAVIGMSCRLPG…
Eurotiomycetes	Aspergillus_oryzae_3.042_GCA_022023715.1	SAT-KS-AT-PT-xCP-Te	MVVEERKQIIVFGDLTCDSVAGLRTLVTVKDNPLLISFFERVTSGLREEIGLLPFSQRQRFIRFTTFEELLARVQRSTCPHPALEKALACTYQLACFIRQYTSPGHKYPSTQQTCLVGLCTGLLSAAAVGCCQSITDLLPLATHTVLIAFRAGLFVADVRDRLEPQTGAPLAWSVLIPGLDGDTASLTLQKYNEEKGLPATSAPYISTYANTGVTLSGLPSALNDLLDSSCLPKNRALTIPIYAPYHASHLYGQKNIESILRKASATEFASYQCQFSILSSITGQSIQVDTFGALIDYALNAILREPLRLDRIVSSLGEALLSDSPIRGCTILPIATVIGQSLAAALRKHGAPDITVDPCMNSSIAVRDDRTSTTGHLGHSKLAIIGYSGRFPDANNNE…
Eurotiomycetes	Aspergillus_oryzae_3.042_GCA_022023715.1	SAT-KS-AT-PT-xCP-Te	MAQSRQLFLFGDQTADFVPKLRSLLSVQDSPILAAFLDQSHYVVRAQMLQSMNTVDHKLARTADLRQMVQKYVDGKLTPAFRTALVCLCQLGCFIREYEESGNMYPQPSDSYVLGFCMGSLAAVAVSCSRSLSELLPIAVQTVLIAFRLGLCALEMRDRVDGCSDDRGDPWSTIVWGLDPQQARDQIEVFCQTTNVPQTRRPWISCISKNAITLSGSPSTLRAFCAMPQMAQHRTAPIPICLPAHNGALFTQADITTILDTTPTTPWEQLPGQIPYISHVTGNVVQTTNYRDLIEVALSETLLEQVRLDLVETGLPRLLQSRQVKSVTIVPFLTRMNETMSNILPVSFVSTETRTDTGRAIPASGRPGAGKCKLAIVSMSGRFPESPTTESFWDLLYKG…
Eurotiomycetes	Aspergillus_oryzae_3.042_GCA_022023715.1	SAT-KS-AT-PT-xCP-Te	MHQIPGFAGLGSDALFSERTLGTAAEDARTSEGQIILRACHDIFVKEITSVIHSQRLPSDIKLEDFVEPESLIRPQACYQRNSIIQHVSLYTIQLLRYLRYSTEKPGVILGVAGFCAGLLPGAALATSRNTIELLSRGQDFFYVALHVGIRIESYKQVMMGKETCPPHLPCSLVVDGITAQHARELLEEHNRRSPASYIYLSAINSDTCVTLSGRGDHLQQFSQSSVPSQCKIRPTNIFSLYHDRHQLEGVRRDILQDLRNNILLFSTPLHLIAPLFSNIDGKPIDSGQLATLEELCEKLLEMMILEPVNWVAVEDNVLAAIKQPATAVDASFEILNFGPGYGISGARYTLPDNVNIVAASIVEPRPSLQDTTGMLSSNDIAIVGMGVDLPGASNTDAL…
Eurotiomycetes	Aspergillus_oryzae_3.042_GCA_022023715.1	SAT-KS-AT-PT-xCP-xCP-Te	MEGPRGVYLFGDQTSDFDAGLRRLLQVKNNTIVASFFQRCFHALRQEIARLSPSERKIFPRFTSIVDLLARHRESDPNPALESALTCIYQLGCFINYYGDLGNVYPSASDCHIVGLCAGLLSSAAVSCSNNVGELLPAAVEAVVVALRLGLCVLKVRELVSSDQASSTSWSVLISGISEKDASQLIGEFTAERAIPPSSKPYISAVGYNSITISAPPKVLDDLIDSRLSKSHKPVRAQIHGPYHAAHLYDGRDVDRIIESCHNEVVSNYTPRIPVLSSTTGQPIEAKHMKDLLKAALEEILLRQLCWEKVTDACYSILKTARHQPCKLFPISSTATQSLFTALTKAGITDIEVENGLGDVPTNPKDNLNISGRADCSKIAIIGMSGRFPEADGTESFWD…
Eurotiomycetes	Aspergillus_oryzae_3.042_GCA_022023715.1	SAT-KS-AT-PT-xCP-xCP-Te	MVNIYIFGDQTVRVDDAVHKLLHVKNNPILKSFLDGSFAAIRKQIFLLPANERTSLPDAHTLPLLLEAVRRGRRHVALESALVCLCEIGQYIALLQTTDLCHPPTGSILVGFCTGSLAAAAVSCVRTSIDLLTLGIEAVVVAFRVGMHVARRANALGGDGGSQWKPWSLAVTDGSESETEKILEEFTRDEVSGVHVANRHDAYILAKGLPAIMKPYVSAAGSNTLTISGTPRVLEALKASPHLRGTKSLPVSIYAPYHAAHLYNEADVESIFACKPVESALFHRELRTPLISCATGTVLKEKTFGDLLRALVMEILTCQIRFDKVEESIVQHTPGATAQLIPIHTNIAPRMKTSLTQVGLQVECFKAIANQEPAAEALSESPSNDSSKIAIIGFSGRFP…
Eurotiomycetes	Aspergillus_oryzae_3.042_GCA_022023715.1	SAT-KS-AT-xCP-MT-Red	MVNSGSNIKSESLTLVFGPQDPNLDNTFLQSLRTTLLETPELQWILETLTQLPQEWQKISDAHSELAAFQGQRYLQLLNEWVRRGTLPSNLFPLPNILVTPLVVTTQLAQYTKFITQLNPGITSNDSLQGALKLDTETAGLCTGLISSAAVAISGTLAELQKHGAAAIRIATAIGALVDAGDSEHEDGDKWESLAVGWTAHGTESKLESIVDGSPEAYVSVISEARLATLTVLKADTLELLEKLKAAGVIFTKTALRGPFHCGKRKDQAASLLQLFDSDPSFQFPHASQLAFSTRSADSGKFRIEDKLHHEAARAMLTDKADWHKLFTALHESTSTRPSLTICFGSQRFVPQWFLRKLGPKLAYAADLDANPGQLPPALGALLGPIEDDAIAVVGMACH…
Eurotiomycetes	Aspergillus_oryzae_3.042_GCA_022023715.1	SAT-KS-AT-xCP-MT-Red	MLSQLEPPPGGKTVLIFGCQCLSFNFDDFHRLRATVLETPEHRWIQDVLSELPVYYRTASTTYVQKLKNIPGTQQLRNLAEWFRTGQVPTDSFPLPYIQLAPLLVITHFTEYWQYLRIRHHKGPTSVKESSAESPVVEIVGFCIGFLSAAVVSAARNQEQLSKYAAVALRLATLIGALGDAQEREEEYTSLATVWKAAELENRLPLVLEAFPESYVTVRFDTNRVTIMTPRRTIKQLENELQSAGFNTTQVEFNGRYHWAGHEDTLHALGRMCDSDPALQLPDTSQSVVPTRPNIPMDTPPKGPLHELVLWSILAKQCQWLDTFSKVYQAHLEDTASLIIEFGPERCIPPTYMRKLQGRTVHFADLDLNTLSRTPPLYQTPRSYDSDIAVVGIACRVAG…
Eurotiomycetes	Aspergillus_parasiticus_E1319_GCA_013145845.1	SAT-KS-AT-PT-xCP	MIEDTTITPSESRSPSPSHANIDMDANIPQGFILFSHELPSGEIQDLIRRLHRYAMLPGYPHLARFLQDCALVLRTEVQKLPRPLRDSVPPFHDVVTLASHWDDFKSSSLGGAWDGAFLCIYEIAMLIGHSETHHTSYRRPSCLVGISVGLFSAAAVAVSESLSDLVSYGAESVRTAFAFCVHVQRVSQTLEPTVTEQATSASWATVVIGVPEDTIREELNRFNHLAELERTGTNAMPLTGVSISHVDSTSVGITGPPTRLKQLFRQSEILRSSRHSALPISGGLCHVPNVYDDDDVRAILETAEVWERWGTRAIEVPLISPFTGAPFLSSDAYHLIEAICTEALTRPLYFDKVASGVVTQLSRGQRPNMQSCQILHYRASVMSDTIVADVAEGLSTRD…
Eurotiomycetes	Aspergillus_parasiticus_E1319_GCA_013145845.1	SAT-KS-AT-PT-xCP-Te	MAQSRQLFLFGDQTADFVPKLRSLLSVQDSPILAAFLDQSHYVLRAQMLQSMNTVDHKLARTADLRQMVQKYVDGKLTPAFRTALVCLCQLGCFIREYEESGNLYPQPSDSYVLGFCMGSLAAVAVSCSRSLSELLPIAVQTVLIAFRLGLCALEMRDRVDGCSDDRGDPWSTIVWGLDPQQARDQIEVFCQTTNVPQTRRPWISCISKNAITLSGSPSTLRAFCAMPQMAQHRTAPIPICLPAHNGALFTQADITTILDTSPTTPWEQLPGQIPYISHVTGNVVQTTNYRDLLEVALSETLLEQVRLDLVETGLPRLLQSRQVKNVTIVPFLTRMNETMSNILPDSFISTETRTNTGRAIPASGRPGAGKCKLAIVSMSGRFPESPTTESFWDLLYKG…
Eurotiomycetes	Aspergillus_parasiticus_E1319_GCA_013145845.1	SAT-KS-AT-PT-xCP-Te	MVVEERKQIIVFGDLTCDSVAGLRTLVTIKDNPLLISFFERVTYGLREEIGLLPFSQRQRFIRFTTFEELLARVQRSTCPHPALDKALACTYQLACFIRQYTSPGHKYPSTHQTCLVGLCTGFLSAAAVGCCESITDLLPLATHTVLIAFRAGLFVADVRDRLEPQTGAPLAWSVLIPGLDGDTASLTLQRYNEEKGLPTTSAPYISTYANTGVTLSGPPSALNDLLDSSCLPKNRALTIPIYAPYHASHLYGQKDIENILRKTSVTQFASYQCQFSILSSITGQSIQVDTYGALIDYALNAILREPLRLGRIVSSLGEALLSDPPIRGCTILPIATLVGQSFATALRKHGAQDITVDACMNSSVAVRDDRTSTTGHLGHSKLAIIGYSGRFPDANNNE…
Eurotiomycetes	Aspergillus_parasiticus_E1319_GCA_013145845.1	SAT-KS-AT-PT-xCP-xCP-Te	MVNIYIFGDQTVRVDDALHKLLHVKNNPTLKSFLDGSFAAIRKQIFLLSANERTSLPDAHTLPLLLDAVRHGRHHVALESALICLYEIGQYIALLQTTDLCHPPTGSILLGFCTGSLAAAAVSCARSSIDLLSLGIEAVVVAFRVGMHVARRANALAGDDGSQWKPWSLAVTDMSESEAERILEEFTRDEGIPAIMKPYVSAAGSNIVTISGTPRVLEAFKTSPQFRGRRSLPVSIYAPYHAAHLYNEADVESIFACKLIEGALFHRESNTSLISCATGMVLKERTFGDLLQTLVMEILTCQIRFDKVEEGIVQHTTGATAQIIPINTNIAPRMTTSLAKVDVRVEYFKAIPNQEPAAEALQESLSNDSSKIAIIGFSGRFPEADGLTEFWELLQQGLD…
Eurotiomycetes	Aspergillus_parasiticus_E1319_GCA_013145845.1	SAT-KS-AT-PT-xCP-xCP-Te	MEGPRGVYLFGDQTSDFDAGLRRLLQVKNNTIVASFFQRCFHALRQEIARLPPSERKIFPRFTSIVDLLARHRESDPNPALESALTCIYQLGCFINYYGDLGNVYPSASDCHIVGLCAGLLSSAAVSCSTNVGELLPAAVEAVVVALRLGLCVLRVRELVSSDQASSTSWSVLISGISEKDASQLIGEFTAERAIPPSSKPYISAVGYNSITISAPPKVLDDLIDSRLSKSHKPVRAQIHGPYHAAHLYDGRDVDRIIESCHNEVVSNYTPRIPVLSSTTGQPIEAKQMKDLLKAALEEILLRQLCWEKVTDACSSILQTARHQPCKLFPISSTATQSLFTALTKAGITDIEVENGLGDVPTNPKDNLNISGRADCSKIAIIGMSGRFPEADGTESFWD…
Eurotiomycetes	Aspergillus_parasiticus_E1319_GCA_013145845.1	SAT-KS-AT-PT-xCP-xCP-Te	MRQPNQSETPKLVVFGDQTANVSSLAKRLLLDAPQSVARSDFIRDTSTTLRALANQLPPLDGEYLPRFENVHDLATIYHESNGACHPAIASTLLAIVQLLQLFQYYETKPRRVEKHDEISVVGLCTGSLVAAAYAACASLDDLKDLAVPTVSIAFQMGLQAAIASSMLHEQGTPLSSWSTAILKMTEDELLSALKMYHADGLLSLHQCFVSAVGLNSVTVSGPPPSLQCFTENLMRSGGKIRPLPIYSAYHASHIHSMLDFPSFLNRAGVDPQHLASFPTRKTLVCPSTGRPVDCPNALGLFKTVVLDTLQAPLRFDLVVDKYVAQIEVKNVTTITLDVVGPTTAAEGLASALRSRTQTTVSIRDIIALDLRKEQYQPSGPHNNAPLAIVGVSGRFPGA…
Eurotiomycetes	Aspergillus_parasiticus_E1319_GCA_013145845.1	SAT-KS-AT-xCP-MT-Red	MVNSGLNIKSESLTLVFGPQDPNLDNTFLQSLRTTLLETPELQWIVETLTQLPQEWQKISDAHSELAAFQGQRYLQLLNEWVRRGTLPSNLFPLPNILVTPLVVTTQLAQYTKFITQLNPGITSNDSLQGALKLDTETAGLCTGLISSAAVAVSETLAELQKHGAAAIRIATAIGALVDAGDSEREDGDKWQSLAVGWTHHGAESKLESIVDGFPEAYVSVISEARLATLTVLKTDAPELLEKLKAAGFIFTKTALRGPFHCGKRKDQAASLLQLFDSDPSFQFPHASQLAFSTRSADSGKFRIEDKLHHAAARAMLTDKADWHKLFTALHESTSSRPSLTICFGSQRFVPQWFLRKLGPKLAYAADLDANPGQLPPALGALLGPIENDAIAVVGMACH…
Eurotiomycetes	Aspergillus_parasiticus_E1348_GCA_013146005.1	KR-KS-AT-DH-xCP-xCP-MT-Te	MTISEMIHQVDWTSAELSTEPLNFRKVVFLAADEESSERLSRYQAQLADEGLTTVLVSHATEIASLLTPDTIVVHIPHVAREKIGVYEAVTKSCTSLIAAAQVLFHHTEDGRDGTSRLFSLISRDSDTDGLECAPLYGLARVMKTEMAEGFGGLFDEDQGHFPLSALKYAQGFDVVRLCHGVPQTASLQPFQDQLNDQKQLQFRENSTYLITGGTRGIGLEIATWLGERGARNLLLVSRGGLTALGRNTNNTDHEQLVSRIAKLKDMGVSVHVLSIDFGKPEAETLLRQAIDELNIPPIKGVVHAAGVAGYHTLQHCSPSDVADVLAPKVRGSLTLYALFPPGTLDFFFFMSSIGQLIGFPGQLSYAPANAFMDGLGAHRRRQGDNSMSILWTAWRGVG…
Eurotiomycetes	Aspergillus_parasiticus_E1348_GCA_013146005.1	SAT-KS-AT-PT-xCP	MIEDTTITPSESRSPSPSHANIDMDANIPEGFILFSHELPSGEIQDLIRRLHRYAMLPGYPHLARFLQDCALVLRTEVQKLPRPLRDSVPPFHDVVTLASHWDDFKSSSLGGAWDGAFLCIYEIAMLIGHYETHHTSYRRPSCLVGISVGLFSAAAAAVSESLSDLVSYGAESVRTSFAFCVHVQRVSQTLEPTVTEQATSASWATVVIGVPEDTIREELNRFNHLAELGRTGTNAMPLTGVSISHVDSTSVGITGPPTRLKQLFRQSEILRSSRHSALPISGGLCHVPNVYDDDDVRAILETAEVWERWGTRAIEVPLISPFTGAPFLSSDAYHLIEAICTEALTRPLYFDKVASGVVTQLSRGQRPNMQSCQILHHRASVMSDTIVADVAEGLSTRD…
Eurotiomycetes	Aspergillus_parasiticus_E1348_GCA_013146005.1	SAT-KS-AT-PT-xCP-Te	MVVEERKQIIVFGDLTCDSVAGLRTLVTIKDNPLLISFFERVTYGLREEIGLLPFSQRQRFIRFTTFEELLARVQRSTCPHPALDKALACTYQLACFIRQYTSPGHKYPSTHQTCLVGLCTGFLSAAAVGCCESITDLLPLATHTVLIAFCAGLFVADVRDRLEPQTGAPLAWSVLIPGLDGDTASLTLQRYNEEKGLPTTSAPYISTYANTGVTLSGPPSALNDLLDSSCLPKNRALTIPIYAPYHASHLYGQKDIENILRKTSVTQFASYQCQFSILSSITGQSIQVDTYGALIDYALNAILREPLRLGRIVSSLGEALLSDPPIRGCTILPIATLVGQSFATALRKHGAQDITVDACMNSSVAVRDDRTSTTGHLGHSKLAIIGYSGRFPDANNNE…
Eurotiomycetes	Aspergillus_parasiticus_E1348_GCA_013146005.1	SAT-KS-AT-PT-xCP-Te	MAQSRQLFLFGDQTADFVPKLRSLLSVQDSPILAAFLDQSHYVLRAQMLQSMNTVDHKLARTADLRQMVQKYVDGKLTPAFRTALVCLCQLGCFIREYEESGNLYPQPSDSYVLGFCMGSLAAVAVSCSRSLSELLPIAVQTVLIAFRLGLCALEMRDRVDGCSDDRGDPWSTIVWGLDPQQARDQIEVFCQTTNVPQTRRPWISCISKNAITLSGSPSTLRAFCAMPQMAQHRTAPIPICLPAHNGALFTQADITTILDTSPTTPWEQLPGQIPYISHVTGNVVQTTNYRDLLEVALSETLLEQVRLDLVETGLPRLLQSRQVKNVTIVPFLTRMNETMSNILPDSFISTETRTNTGRAIPASGRPGAGKCKLAIVSMSGRFPESPTTESFWDLLYKG…
Eurotiomycetes	Aspergillus_parasiticus_E1348_GCA_013146005.1	SAT-KS-AT-PT-xCP-xCP-Te	MEGPRGVYLFGDQTSDFDAGLRRLLQVKNNTIVASFFQRCFHALRQEIARLPPSERKIFPRFTSIVDLLARHRESDPNPALESALTCIYQLGCFINYYGDLGNVYPSASDCHIVGLCAGLLSSAAVSCSTNVGELLPAAVEAVVVALRLGLCVLRVRELVSSDQASSTSWSVLISGISEKDASQLIGEFTAERAIPPSSKPYISAVGYNSITISAPPKVLDDLIDSRLSKSHKPVRAQIHGPYHAAHLYDGRDVDRIIESCHNEVVSNYTPRIPVLSSTTGQPIEAKQMKDLLKAALEEILLRQLCWEKVTDACSSILQTARHQPCKLFPISSTATQSLFTALTKAGITDIEVENGLGDVPTNPKDNLNISGRADCSKIAIIGMSGRFPEADGTESFWD…
Eurotiomycetes	Aspergillus_parasiticus_E1348_GCA_013146005.1	SAT-KS-AT-PT-xCP-xCP-Te	MRQPNQSETPKLVLFGDQTANLSSLAKRLLLDAPQSLARSDFIRDTSTTLRALANQLPPLDGEYLPRFENVHDLATIYHESNGACHPAIASTLLAIVQLLQLFQYYETKPRRVEKHDEISVVGLCTGSLVAAAYAACASLDDLKDLAVPTVSIAFQMGLQAAIASSMLHEQGTPLSSWSTAILKMTEDELLSALKMYHADGLLSLHQCFVSAVGLNSVTVSGPPPSLQCFTENLMRSGEKIRPLPIYSAYHASHIHSMLDFPSFLNRAGVDPQHLASFPTRKTLVCPSTGRPVDCPNALGLFKTVVLDTLQAPLRFDLVVDKYVAQIKVKNVTSITLDVVGPTTAAEGLASALRSRTQTTVSIRDIVALDLRKEQYQPSGPHNNAPLAIVGVSGRFPGA…
Eurotiomycetes	Aspergillus_parasiticus_E1348_GCA_013146005.1	SAT-KS-AT-PT-xCP-xCP-Te	MVNIYIFGDQTVRVDDALHKLLHVKNNPTLKSFLDGSFAAIRKQIFLLSANERTSLPDAHTLPLLLDAVRHGRHHVALESALICLYEIGQYIALLQTTDLCHPPTGSILLGFCTGSLAAAAVSCARSSIDLLSLGIEAVVVAFRVGMHVARRANALAGDDGSQWKPWSLAVTDMSESEAERILEEFTRDEGIPAIMKPYVSAAGSNIVTISGTPRVLEAFKTSPQFRGRRSLPVSIYAPYHAAHLYNEADVESIFACKLIEGALFHRESNTSLISCATGMVLKERTFGDLLQTLVMEILTCQIRFDKVEEGIVQHTTGATAQIIPIHTNIAPRMTTSLAKVDVRVEYFKAIPNQEPAAEALQESLSNDSSKIAIIGFSGRFPEADGLTEFWELLQQGLD…
Eurotiomycetes	Aspergillus_parasiticus_E1348_GCA_013146005.1	SAT-KS-AT-xCP-MT-Red	MVNSGSKIKSESLTLVFGPQDPNLDNTFLQSLRTTLLETPELQWIVETLTQLPQEWQKISDAHSELAAFQGQRYLQLLNEWVRRGTLPSNLFPLPNILVTPLVVTTQLAQYTKFITQLNPGITSNDSLQGALKLDTETAGLCTGLISSAAVAVSETLAELQKHGAAAIRIATAIGALVDAGDSEREDGDKWQSLAVGWTAHGAESKLESIVDGFPEAYVSVISEARLATLTVLKTDAPKLLEKLKAAGFIFTKTALRGPFHCGKRKDQAASLLQLFDSDASFQFPHASQLAFSTRSADSGKFRIEDKLHHAAARAMLTDKADWHKLFTALHESTSTRPSLTICFGSQRFVPQWFLRKLGPKLAYAADLDASPGQLPPALGALLGPIEDDAIAVVGMACH…
Eurotiomycetes	Aspergillus_persii_NIBRFGC000004109_GCA_002215965.1	A-xCP-KS-AT-KR-xCP-Red	MRDMYHTISDEDRLALIEQFNATKDATTLGFCLPELFEKVAERYPNNIAVIYDDTELAYGTLNRLANQLARILVEERGVGRGNVVGVALDRSIDLTVAVLAVVKAGAAYVPIDPAFPADRVTHMVNDAGPKLVIVSDSTVTALSPWRDICLSTDAVRDNMKQVDSSNLTTQNVRPEDLAYVIYTSGSTGRPKGVEANHGALCNLLLSMQREPGCAPEDRLLAVATISFDMSILDLLLPLASGAATVIAPTGALRDPGALLTLMERYSVAMIQATPSFWQMLLDGGWKGQPRLVKVLTAGEPISRRLLDRLLAYGDMVWNGYGPTEATVYASVGRVSQDEQDIVIGHPIANFQLYVLNPKDLTPMPMGGLGEVYIGGCGVNCGYRNKPDMTKERFLENNP…
Eurotiomycetes	Aspergillus_persii_NIBRFGC000004109_GCA_002215965.1	KR-KS-AT-DH-xCP-xCP-Te	MTSTRPFHRIQWTPAPLSSEPLNFTKVVFMVDDPATAESQHHRLAAYQEELVESGYTVIVASHSEVSDVLTPGTGTAVIHIPHAAPSRENVYSAAVGSCASLIALAQALVPISLSRPGTGDFDAVKLFSLVVTDGGISDLGYAPLHGLARVLKMEIPDLFGGLVEMESPGPVGFPMSVIKYARGFDIVRVCGDEKEGVPQTASLQPLLSQDEESEERPPVVFDPDSAYLITGGTKGVGLETASWMTEHGARHLILVSRHGVGASGTKGASAGTPGSRIAEMEARGAIVHVLAIDLSLPGAELTLREGIDRLRSPVVKGVVHAAGTARYQTLKACTPADIDSVFAPKVRGALSLDALFPPGTLDFFLLVSSIGQLVGFSGQLSYASANAFLDGLATRRRR…
Eurotiomycetes	Aspergillus_persii_NIBRFGC000004109_GCA_002215965.1	SAT-KS-AT-PT-xCP	MNPAGRPTRFKDSCDNCAQAKIKCSRDRPSCLRCLRNGVICCYSLARRGKAASAPIVSEKANLPKSSAAKGLQRSVMSLAEDVNSHLPDFPFVDEGFVVSPDFTPGQANPPKSPALSAPRPSVTNLVGDFSYDTPNLTSIDNDLSLSTDSLASRGSEAHQMAGMPHDFGLPPLGLGLDCPLLSRIGHGGLNKRDVPVSTIAAIHSALTTLPQDPTESQPDDRTLGTDGTGDISASDSSANIHVLLSTLKSLHMPSMMPTPGLDMTLKVTSMAVGNLSALLKDPCWLNSSNIALLALVCCNSILEAYQQVLLIHRDPISASDDKDHSEGAMDCRAATTPIAADMHIAVGEYLPESSVKQKIIFSVLLAPATMAETTLIEPAEVKSLEDSLEAGRSKLVFF…
Eurotiomycetes	Aspergillus_persii_NIBRFGC000004109_GCA_002215965.1	SAT-KS-AT-PT-xCP	MSTSSSPPSTTSFHMVACTPPAEAEDLPEFKALYFSNEFPTDDLSILLRRIHSHSKQRNHAILARFLNDATISLRNEVGQLRAELAQLVPAFESVTTLAGETDLRKGPLSQSIDGVLLCVLQLGTYIGHCELYPEDQARGPNNLLTGLGVGILVSTAVSVSMSLDDLVTAGVEVLRIAFRLGVFVGDVSQNLEAVDTESPDSWAYVVYGLTVDEAQKELDHIQARENTPSASKIFVSAISETSVTVSGPPSRLKALFRNCALFRDRKYAQLPVYGGLCHAAHIYTYQDAQAVVQSPSLAPRFRPIVPVMSTSSGQPFVASTATDLFEQVIFEVMTKQIVWENVTRGVAEKVAKSDARDVSIKVFRHSVAAQQLSSALTSTISDVSVEIDDLLAWVTSDV…
Eurotiomycetes	Aspergillus_persii_NIBRFGC000004109_GCA_002215965.1	SAT-KS-AT-PT-xCP-xCP-Te	MANAAGVLHFGDQTVDISSSLQELDHLSKSSQELATFLRISADSLRAALFGLPVASPSQLSWRTLRDLGNALAESPSKSAPLAPAALCICQIGYLLVHLQRQPQLLFSSNRKLLLGVCTGMLPASLAACITSVTELLTFAPEIIRIALRLGIRVCSRSKSLERSTGSWALACAGVSLDAVQDKLAQFHGIYSTPETRRLYISAIVHRLSFTVSGPPKALEQFSGFLRSQFPEARRTQLSIYSAYHAGHIHREDVGSILGDAPVLDTPIASCRSVFSTSMGRAMEGVLTLRDCLRHSLLDILRRPLDWTATMEGLVDCDLKDPVLTVIGPSYMTKSLKETLKWDQKVCLSDWNLIHQNEKISGSFAIVGMSGRFPGSDNLDAFWNVLEDGLDLHREIPAN…
Eurotiomycetes	Aspergillus_persii_NIBRFGC000004109_GCA_002215965.1	SAT-KS-AT-PT-xCP-xCP-Te	MVNELHVYLFGDQTFEVSTKLPLLLHSETSPLLDAFFEQAYHALRSEIAQLHARDRDTYPRFSSIAELLAWRNRQEKVHQPIETTLTLSMTDSDKPILPCCNTVSELLPVAVQTVLVALRTGICAWNAAKTVNESEGNWSIVLHGISQREVSGRLQEFSHSQRLPITSQPYVSAYAENWVTISGPPRVLGLFRDLKTFQTAHSRTISIFAPYHASHLFTNADIEAILSTTPEGAWGRYSAVLPVVSSTSGRLIEGDNLRRRLEAALVQILFEPVQWHQLTQGVASVLSSRGASQFTISPVGTNANAALGAALSSTTGLSSEANPERTPGTSQVENGQIISTSSKGSSKIAIIGMSGRYPSAENNEEFWDLIFRGLDVHKVVPDFHWNAQTHVDSTGKKK…
Eurotiomycetes	Aspergillus_persii_NIBRFGC000004109_GCA_002215965.1	SAT-KS-AT-PT-xCP-xCP-Te	MELYIFGDQTAHVASKLQDLLQIKGNNTLTSFLFEGYLAIRQEIARLPASEQDDLPQTETLGLLLDAIKKGKRHPALDSALLCLYEIGEYVRLLPSVKLAHPPPNQFLVGLCTGSIAAAAISCTKTTVDLLPLGVEAVLVAFWVGMHASRRANALVPSALAHSKPWTLLLPGLSESEAINVIKGIVDIKPYFGQSIPATAKPYISAVGANSVTISGPPKVIEALQNSSAFKRCLSMPIYAPYHAPHLYSESDVAMILNSSSQFNHSLRDRATRIPVISSASGKKLHESTFGSLLHGLVDEILTGQVRLDLLADGLSQCLPQCLPNGTVQLIPIHTQTASGLMESLRQKGLDVDCINTAASGHKQTEPDTLVPSHDSSKIAIVGFSGRFPEADGLDEFWS…
Eurotiomycetes	Aspergillus_persii_NIBRFGC000004109_GCA_002215965.1	SAT-KS-AT-PT-xCP-xCP-Te	MERSGTILFFGDTSTPVTSALAHLLDAERKDTLLSRFLTLSKAVLRDSIERLPLQFRQDAHRFTDLHDFTDPQHGKSSSLRVLSPALLVIAQLGQFISWYETHPHVEYPSPQSTVYIGLCVGQLSASAISLSTNLLELIPLAVEAVRVAVNLGSLAFTVRNDLEYDADGAAWALTVENEIINKHIDLSSEALGLPNRKQAYVSATFENTTTIQGPPTKLARLKDALADLKELTSNLSGRPIGIYAPFHASHLYTEADVLGLFDKSDLIKAAYTADIWNKEQPSILSTNSGTKIPVASRQGLLQAVLGDILVSPIEWSNITQGAISSVLSLGHVRWETQCFGPLHSQKSLVAAISTGAGVEVSLADTSIQPASRSRETLNTPIAIVGMAGRFPDADSVEE…
Eurotiomycetes	Aspergillus_persii_NIBRFGC000004109_GCA_002215965.1	SAT-KS-AT-PT-xCP-xCP-Te	MTANVFLFGDQTVPFGSLLHNLLQVKDSPVLTDFIDRLGYRLRRYVASLPVCQQEWFPCFTTLVDLFAQHEKSHASPALKFAFVATTQIGLFIRYFGDESRPYPTDNAYVIGACTGCFAAAAISTSRTLTELVPAAVEACLAALQTAVRALTLRDDLIGPEEEHKAWSVLVGIDESAAEELVQRFNAEKSLPRVMQLYVSSISNCVTISGPPGLLPQFLLASALKHSVLPIDLPYHAPHLFCGSDAGRFHHPSLKGYEQRLAVVSAASGEVLVSQTFEGLLYRAVTETLSQPIQWNRLVPGLSKELSAHGFKTCNWYSVQYRGSFLATSVAQRVSSLDFTSIPIYEGPQNSLSKHQPTGNFSHSKIAIIGYSGRFPDAASNEEFWSLLLAGLDVHRTIP…
Eurotiomycetes	Aspergillus_persii_NIBRFGC000004109_GCA_002215965.1	SAT-KS-AT-xCP-MT	MAPNGSLPAMVVFGPQCSSPAGEDLNDLRETLAFHPQLDPLRSAVKGLPGFWHDVTQSNPELLRIPGDRCLADLMQWLESGDLSCFGHELNTLSFPLMALLQIAMYMRYLDSVRDIYAYETVRENLKHGGVQGFCLGFLPAAAFACAETEADIATSTAASIRLAVCVGVYIDLDNVFAQPARQTTSLAARWKDGEMSLGKVDKLLEMSPEAYISCINDETCVTITASIEHKDPLRDTLQANGLRVRSVQTQGRFHSPVHETTLKKLLEFCSTRKELHLSTPSVPLRSNISGETIENEPLHALVLESILCRTANWYKTIQNSFAGLEDTNRTILFIGFGDDPIPSSLLQERSTNVVPLWRRQTHLPSLKSSTANGMMSLHPTDSNGVMASNQYPPHSVAV…
Eurotiomycetes	Aspergillus_persii_NIBRFGC000004109_GCA_002215965.1	SAT-KS-AT-xCP-MT-Red	MIRNVFLFGPQALSLDVDDVKTLRDTLHSTPTGQWALDCLSELPSLWEYVAKNVSQLKSSDGQAVLQNFVDKFNAGDIFPSMFPLPNILSTPLVVIMHLTQYSKAIRETWPKLKEDDPLPADFMQESAAAGLCIGLLGAMAASHSDTLQSLAANSAKAVRQSMAIGALVDAEMMANVSIGSAVSFSVSWGADRTLDMVKKLIQPFSDAYISVITDQRRATITVSEKLAVGFAQTLKAAGIYVVRLELAGRFHWQGHDENAKELAHLFASNEEFSLSNPRHMMFHSNGSSSSRDSRVEVTVLRDILLEQSDWLSSFSQLVDPSVFNTSQGRIINIGPERCVPPTFASKLSSRIAHIGDSSLAKVGISSQVRGGDEQVAVVGMSCHVPGAEDLEEFWNILV…
Eurotiomycetes	Aspergillus_phoenicis_ATCC_13157_ATCC_13157_GCA_003344505.1	A-xCP-KS-AT-xCP	MVPEDDFNLTDDPSKLGHNVVSLFDQTQTRYSPKAAIVCGEHTLTYGALASDSDRLACLLLSRGISRGHVVALALDRTPDLIMFILGVLKAGATYVPVDPALPPERVNQMLDDEALRLVIVSPVSTKGGAGTGRYDYGNKAVCCTTSELQDQMRYQADKRPAVDIQPDDIAYILYTSGSTGKPKGVEIHHAAICNYALSVHQRPGCTDQDRVLFKSTISFDMAAFEIYVPLLCGATVVQAQAHDIRDPRALMHLIDRHSVTFSVATPTILQMMLDSGWCGTPGFSKLVTGGEALSPRLAERLTACVEEVWNLYGPTETTASVAAWKVQVGEDILIGTPNPNTRLYVLDADLQPVPVGSTGELYISGAGVARGYRNNPERTKAAFLPDPFWEGHTMYKSG…
Eurotiomycetes	Aspergillus_phoenicis_ATCC_13157_ATCC_13157_GCA_003344505.1	KR-KS-AT-DH-xCP-xCP-MT-Te	MEMWSASDPAWSLSATPKQFRRFIQFDLSDFYAVLRPYTRERGSMLAVFNTQDESMHKLIKSPIAPLFSLSNVVHFEGLVEEVLACLSEQFDKRFVATGEAFDCAEWLQYFAFDVMGTMSFSKRYGFLEQGRDVNGMLRAIFEFFMVAAPMTQLTWLDPILYKNRLAHSFRQTPGMSILGFVGKAIGGRLAKSGDVKEDSGFTPPNKDFLARFLETQKLNPKLPPWVSTAWTFSNVIAGSDSVGTVMKTAICEFALSTNQVKQQKRLQRELDGANLTRPYPQWSEVRDLPYLDACIQEAARLHPPFALPLERIVPRGGVTVLGHYLPEGTLVGGNPYVVNRHEATFGPDVEAWKPERWLNAEDDHKRLLEQSLLTFGAGRRVCLGRHIGIFELKKLLPF…
Eurotiomycetes	Aspergillus_phoenicis_ATCC_13157_ATCC_13157_GCA_003344505.1	SAT-KS-AT-PT-xCP	MLADMCVGVYKAAINKFPIDDLPDLFRRLRLCSQSPRHVVLRRFLEEATRVVREEIYRLPPELRSLIPPFQSILDLAQNYHWHKGPLCGIFECIFLCLVQLGLFVGNYEIRPHEFSFNTQESLFTGLGLGFLAATAVVASPSLLDLPITAAEVVRIAMRAGILLYQKSQDLEQLSLDSSLESWTTVVRGLDESIVRGELEKFNKSMETPPSSRIYISVVEPDGSVFISGPPSGLREFFNKSGKVQSAPRAPLPVYGGPCHAAHLYDRTHTEWVVSKVNPEIASRRLSGHPLVLSMGDGQPLAGENARDLFESATYVLLTSIIRWDSVLAAVKKLPHWKQDTKLQLETFRPSSPAVHGLISAVQSEYPDCTVSVDDLGDWIIDNSLEPPTIPIDSRIAVV…
Eurotiomycetes	Aspergillus_phoenicis_ATCC_13157_ATCC_13157_GCA_003344505.1	SAT-KS-AT-PT-xCP	MSGPTKLVFFGNEFPNDDLKALFRGLHRHGKDRRFRQLATFLEESTRVLQNEVAQLPEPLKKLVPHFENLMPLTEVDFRQGPLGAAMESALLTILELGMFIGHYEAEERVWDLSADRTTLAGLSIGLLAAAGVALSTHLAEVVQNGAECVRVSFRLGVYVHDISRKLEAPQADGSLLSWAHVVTGETASDLQEELSRYNTETGTPELLKVFISAADKTSVSVSGPPSRIRAAFRASQRLRYSKSLALPVYDGLCHAAHLYDEETIHRVLHPDGSVIPTSRPVQLALLSSRSGQPFEATTAAELFRAISTELLTGTIFLDNITAGILDRTERCADAPQCQIETYRTSLVFKGLLKALEACFPDRTISTTDLIPWVFQDYGARQPKSYADSKLAIVGMACR…
Eurotiomycetes	Aspergillus_phoenicis_ATCC_13157_ATCC_13157_GCA_003344505.1	SAT-KS-AT-PT-xCP-xCP-Te	METVAEVFLFGDQTVVFESTLHSLLHVKDNAVLTDFFDRVGFQLRRHVGNLPLHQQEWFPYFTTLIDLLAQHENCHAAPALKLPLLCATELGQFIRHYGQAGRTYPAPESTFLIGACTGAFAAAAVATSLTLAELVPAAVEAVTVAFRTALRSLILRSDLVPTVEETPEPWSAIVGVSETEATSAIQGFNAEKGLPPVYRLYLSSVSRTNVSISGPPHLLGQFLSSYAWKHSFLPIELPYHASHLFRKADADVIVDDIHDSSLLKYTLRTKVISAVSGEIITASDLRSLLLRAVQEALCEPLQWNRITASLSRELKQGQFTDCVINQVSSRSGTLLSSALSQEAFLQVKIVQSIGDASVHSALSSPTGKFSQSSIAIIGFSGRFPESGSNEEFWEMLLA…
Eurotiomycetes	Aspergillus_phoenicis_ATCC_13157_ATCC_13157_GCA_003344505.1	SAT-KS-AT-PT-xCP-xCP-Te	MEGPSRVYLFGDQTSDIEAGLRRLLQAKNSTIVQSFFQQCFHAIRQEIAKLPPSHRKLFPRFTSIVDLLSRSRESGPSPVLESALTCIYQLGCFIHFYGDLGHDYPTPSNSHLVGLCTGVLSCTAVSCARNVGELIPAAVESVVIALRLGICVFRVRELVDSADSESTCWSALVSGISEAEASHLIDEYSSKKATPPSSKPYISAVSSNGVTVSAPPTALDEFVETCISKNYKPVKAPIHGPYHAPHLYDDKDIDRILQQSSALEGLTGCSPVIPIISSNTGKPIKAKSIKDLFKVALEEILLRRLCWDKVTESCTSVCKTGTNHSCKLFPISSSATQSLFTVLKNAGVSISLETGVGEIATNPEMRNLTGKAENSKIAIIGMSGRFPDSDGTESFWNL…
Eurotiomycetes	Aspergillus_phoenicis_ATCC_13157_ATCC_13157_GCA_003344505.1	SAT-KS-AT-xCP-MT-Red	MVTTTRAPNPTNTLLLFGPQALSFSTATFADIHARVVQTSENAWIKQTITSLPGLWDALVKQFPQYGALEGKQLLRDLNRWFETGTMEHAEPHLPNILLSPMVVITQLTEYVDYLKTMPHAADQQTETVGFCTGLLTALAASLAPDIKGIRQYGAIAIKLAMIIGGVVDVQDITSPNGPSKSLAVAWDSAETQDRLNQIIDQSPEAYISVEYDHNRATITTAARSISSLQQRLRNAGLIASEIGLRGRFHCACYEEDIEALSKFCDSVPSLCLPDAAVLVLPTRSNDAGSFILSGKLHHCALRSILLDTSHWYQTLEVVRQSCLKSPSSMVVSFGPERCIPPSILKGLSSIVTTAAEYQPSYLHRDPELCNPNEIAVIGMSCKVAGADDVDEFWDLLCK…
Eurotiomycetes	Aspergillus_piperis_CBS_112811_CBS_112811_GCA_003184755.1	A-xCP-KS-AT-KR-xCP-Red	MGDMDGTISNEDYLTLIEQFNATEDATTLGFCLPELFEKVAERYPNNIAVIYGDTKLAYGTLNRLANQLARILVEERGVGRGDVVGVALDRSIDLIVAVLAVVKAGAAYVPIDPAFPADRVTHMVNDAGPKLVVVSDSTVTALSPWRDICLSIDTVRGNMKQVDSSNLTTQNVRPENLAYVIYTSGSTGRPKGVEANHGALCNLLLSMQKEPGCAPGDRLLAVATISFDMSILDLLLPLASGAATVIAPTEALRDPGALLKLMERHSVTMIQATPSFWQMLLDGGWKGQPRLVKILTAGEPISRRLLDRLLAYGDMVWNGYGPTEATVYASVGRVSQDEQDIVIGHPIANFQLYVLNPKDLTPMPISGLGEVYIGGCGVNCGYRNKPGMTKERFLDNNP…
Eurotiomycetes	Aspergillus_piperis_CBS_112811_CBS_112811_GCA_003184755.1	A-xCP-KS-AT-xCP	MVPENEFNLTDDPSKLGHNVISLFNQIQSRYSSKAAIVCGDHTITYGALASESDRLACLLLSRSISRGHVVALALDRTPELIIFILGVLKAGAAYIPIDPTLPSERVNQMLDDEALRLVIVSHASTKGMTGTCRCDYGHKAACCTTSELRDQMRYQADKKPAVDVQGDDLAYILYTSGSTGKPKGVEVHHAAICNYALSVHQRLGRTDQDRVLFRSTISFDMAAIEIYVPLLCGATVVQAQTYEIRDPHALIHLINHHAVTFAVMTPTILQMLLDSGWCGTPGFSRLYTGGEPLSPRLAERLTACVEEVWNIYGPTETTMSVTAWKVQVGEDILIGTPNANIRLYVLDADMQPVPVGGTGELYISGAGVARGYRNNPERTKAAFLPDPFWEGHTMYKSG…
Eurotiomycetes	Aspergillus_piperis_CBS_112811_CBS_112811_GCA_003184755.1	SAT-KS-AT-PT-xCP	MRVVFFSNKFPGVDLRDLSQRLRFVSRSRSHGLLRRFLEEATMVANEEIRRLPPELKTLIPPFHSILDLVDSFDWHGGPLTGVFECAFTCLFHISLFLGSYERNPQEFNFSNSTFTGLGLGYLLYQKQQEIEPQEPDAPPKSWSVILKNMDQATVQETLDHFNASIDVSITGKLYISVVEPDGSLFVNGPPSILAKIFGKTGKLASARHAALPVYGGPCHAAHLYDRADSARIAETVSPQIANRRVPSNVCLLSMVDGKPLGSQTVLELFESAIYCLLTGTIQWGNVAEAIFSSSDWNEEAHVHLESIFQPCPVVNTLISRAQATYPHCTVDTREHMQWVFMDENKPTNPSSTDIAVVGMSCRLPGGANDLTQFWELLVDGRDVHKKIPADRYDVETHT…
Eurotiomycetes	Aspergillus_piperis_CBS_112811_CBS_112811_GCA_003184755.1	SAT-KS-AT-PT-xCP	MSAPTKLVFFGNEFPNDDLKTLFRGLHRHGKDRRFRQLATFLEESTRVLQNEVAQLPEPLKKLVPHFENLMPLTEVDFRQGPLGAAMESALLTILELGMFIGHYEAEERVWDLSADRTTLAGLSIGLLAAAGVALSTHLAEVVQNGAECVRVSFRLGVYVHDISRKLEAPQADGSLLSWAHVVTGETASDLQEELSRYNTETGTPELLKVFISAADKTSVSVSGPPSRIRAAFRASQRLRYSKSLALPVYDGLCHAAHLYDEETIHRVLHPSGSVIPTSRPVQLALLSSRSGQPFEATTAAELFRAISTELLTGTIFLDNITAGILDRTERCAETAQCQIETYRTSLVFKGLLKALEACFPDRTISTTDLIPWVFQDYGARQPKSCADSKLAIVGMACR…
Eurotiomycetes	Aspergillus_piperis_CBS_112811_CBS_112811_GCA_003184755.1	SAT-KS-AT-PT-xCP-xCP-Te	MEGPSRVYLFGDQTSDIEAGLRRLLQAKNSTIVQSFFQQCFHAIRQEIAKLPPSQRKLFPRFTSIVDLLSRSRESGPSPVLESALTCIYQLGCFIHFYGDLGHDYPTPSNSHLVGLCTGVLSCTAVSCARNVGELIPVAVEAIVIALRLGICVFRVRELVASADSESTCWSALVSGISEAEASRLIDEYSSKKATPPSSKPYISAVSSNGVTVSAPPTVLDEFVETCIPKNYKPVKAPIHGPYHAPHLYDDKDIERILQQSSALEELTSWSPAIPVISSNTGKPIKAKSLKDLFKVALEEILLRRLCWDKVTESCTSVCKTGTNHSCKLFPISSSATQSLFTVLKKAGVSVSLETGVGEIAMNPETRNLTGKAENSKIAIIGMSGRFPESDGTEAFWDL…
Eurotiomycetes	Aspergillus_piperis_CBS_112811_CBS_112811_GCA_003184755.1	SAT-KS-AT-PT-xCP-xCP-Te	MSKMETVAEVFIFGDQTVAFESTLHSLLHVKDNAVLTDFFDRVGYQLRRHVGNLPLHQQEWFPYFTTLIDLLAQHENCHAAPALKLPLLCATELGQFIRHYGQAGRTYPAPESTFLIGACTGAFAAAAVATARTLAELVPAAVEAVTVAFRTALRSLILRNDLELTIDGPQKSWSAIVGASEPEAANAIRCFNVEKGLPPVARLYLSSVSRTNVSISGPPRLLGQFLLSCAWKHSLLPIELPYHASHLFRKDDAEIIVGDFHDFSLLKYTQRTKVICAVSGEVVVASDLRSLLHRAVQEALCEPLQWNCITASLSQELKQGQFTECVINQVSSRSGSLISSALLQEAFLGVKIVQSIGDVAVSPAPSSPTGKFSQSSIAIIGFSGRFPESGSNEEFWEM…
Eurotiomycetes	Aspergillus_protuberus_HOSP050413_4_129_GCA_021436995.1	SAT-KS-AT-PT-xCP	MDPRHPRLVFFGNEVPSDGAKDLFRRIRQHSKDRRFRLLSMFLEESTAILKEETAKLPKQLQALIPHFDTVCSLADVDFRQGPLGAAMESALLTILELALFIGHYEAEDSEWDLDPSQTILAGLSIGILAGAAVSLSSNVSDVAKVGPESIRVSFRLGVYVAGISSKLEAPQSDGTLQSWAHVITEITQDAVKHELSQFNEGVHNPELTKVFISAADSTSVSVSGPPSRVKAAIQYSPVLRYSKQLPLPVYDGLCHASHLYREGDIESVINSSDSVIPNSRTVRLSLLSSQTGAPFKARTARELFLEIGTELLTGTIYLDKVTAGIVEHAKLHSAMGSYRIDTFRTSLVLQGIHSAIQASISQPLSRKDLVSWAHKDYGTLRPSSYAASKLAIVGMACR…
Eurotiomycetes	Aspergillus_protuberus_HOSP050413_4_129_GCA_021436995.1	SAT-KS-AT-PT-xCP	MKLLYFSNEFPKDDLQGLFRRLYNHSKDRRHPILARFIDEATLAVRDEVRQLPTSVKSLVPAFETVLNLADYPELRKGPLSGSLDGVLLCVLEIATLIGYYENTPDRFDIHNVSTYLAGLGLGLLSTAAVSLCSTLADLPVTGAEVVRVSFRLGTLVDEVSQNLEPRDTSGSPDTWASVVPGAKVEEVQAELDAIHARENTPQPSKIFISAWGEGSVTISGPPSRIKRVLRLSEFFRRHKVHAREIISTKTIDSIDAVYSPTVPIYQTSTGKLFPCSTAKELFEKLVFELLTQPILWDNVIQGVVDQAYTISATNCEVLVFRISVPINDLRTTLSSKLQGFEASTEELIPWILEKPNNESPRGTKQSKIAIIGMSCRMPGGATDTEKFWDLLEQGLDVA…
Eurotiomycetes	Aspergillus_protuberus_HOSP050413_4_129_GCA_021436995.1	SAT-KS-AT-PT-xCP	MKENTHSTSIIFFGNEFPNDDLKGLFRCLLRLSRDRRFRQLAAFLEESTLVLKKEVAALPQQLRDLVPHFHTILPLAELGDFRQGPLGAAMESALLTVLELGMFIGHYEAEERSWDLFPHNTILAGLSIGLLAAAGLALSTNLAEVAQNGAECVRVSFRLGVYVSEISRKLEAPQADGTLLSWAHVVTGETKTAIQDELTQYNSESGTPELLKVFISAADKTSVSVSGPPSRMKACFGGSHLLRYSKSFALPVYDGLCHASHLYNEDSINTVINSAESLIPTSRPVRLSLHSSNTGQPFLATTAHELFQAIGTELLTGTIYLDNITDGILELIGNFSPSQCRIETFRTSIVFKSILAAVKAQFPSLDIKLVDLIPWSLRDYGTLQPRSFAHSKLAIVGM…
Eurotiomycetes	Aspergillus_protuberus_HOSP050413_4_129_GCA_021436995.1	SAT-KS-AT-PT-xCP	MQLQGTNTYVVGTGPERLLIDTGQGNARWAESIRSLTEKHGFKICSVLLTHWHLDHTEGVPDLLRMNPDLTGAIYKHEPDPSQRPISDGQTFAVEGATLTAVFTPGHTADHMCFFLQEEEAIFTGDTILGHGATGTEDLGQYMQSLDKLSSLNCRGGYPGHGAVIPDLARKLQQEISMKLRREKLLIRALEDVQLDKSGATPAELTAAVYGQLPRDSPTTLVEGYVNDILMKLAAEKRVAFKLQGGQKRWFVHTRTKLRMFCTMSTETPPCNLFYFSNELPPDELNDVFRRLRIRSKTQRHPVLRAFLSQATLVLREEISQLPGSLRSQLPPLGNALDLAEVRNSNRGPLAGAVAEVVLCLLHIASVIGYHERVPGQFQFSKSTTCFTGIGPGLFGAAA…
Eurotiomycetes	Aspergillus_protuberus_HOSP050413_4_129_GCA_021436995.1	SAT-KS-AT-PT-xCP-xCP-Te	MSPTHVLLFPHERATLAAVHDLNVRSKSRRRLQALLTDASTVVQRHTASLDGLERASIGPFEDLVELAERHATHKGSIVADLVLLTTVQIGQLLVLAEDQPAILSENRVPLAFGAGLLAAGVAVAASTVDEIVTLGLEAVSTAFRLGIALQRRGKDIEDSDEPWARVVSSTMSVADLEQTLERFNASISPMNRVYIGQALTDSTVVFGPPSTLDAFEKTPEIAAAVTSRPVLDTAPMHGSHLPTVDAASILTHSVNGKVRELWKLAVDQVAHQRIHIEETVAGLVNDLQPNTAIILTYIGSEASNITSLLEKSSFTVQPSQLSPAPKPYGDDLDTIPADAIAVVGMSGRFPDSDTLDEFWKLLESAQTTHQVIPESRFNVDDFYDPTRAKHNALLARYG…
Eurotiomycetes	Aspergillus_protuberus_HOSP050413_4_129_GCA_021436995.1	SAT-KS-AT-PT-xCP-xCP-Te	MLTIGSYHGDLGHAYPSNASTQLVGLCTGLLSCAAVSSASNIGELLAPAVEAVVVAFRLGLCVRRVRELVNQEIAAPLSWSALVSGINEADGMDLISDFNIQKAIPPSSRPYISAVCANTLTISGPPAVLNQFLDTTISKQNKAIRVPIHGPYHASHLYDDRDVGRVLEHCDTDLVCNRQPRIPVLSSNTGELITTESMRDFLKIALEEILLRQMCWDKVTDSCATILNSVNERTSKKLLPISTSATQSLFNSLKKENVSNIDVDGSVTDITSPGPANNHTGRAELSKIAIIGMSGRFPDSDSPQDFWNLLCQGLDVHRKVPEDRWDADAHVDLTGTGRNTSKVQYGCWIREPGLFDPRFFNMSPREALQADPAQRLALLTAYEALEGAGFVADSTPST…
Eurotiomycetes	Aspergillus_protuberus_HOSP050413_4_129_GCA_021436995.1	SAT-KS-AT-PT-xCP-xCP-Te	MMASQADSTRLFLFGDQTYDFVPELRDLLTIRNNPILVAFLEQSHYVIRAQMIQKLTPKEYKQARTASLAEVLQKYVDGKLPSAFQTALSCITQLGFFMRQFDEPAIPYPRFNDSYVLGVCTGSLAAAAISCSTSLSELLPIAVQTVLVSFRLGLCAQEVRDRLEISDANHTKPWSVVSDILPDEMAIAINRFSNQKVATSTKTTTVSGSPDILAGLATQPLLKDSKRWMGIPIYVPAHNPHLFSSKDVDNILETTNEGYWGTYGSKIPFLSSVTGKLVWVRNYRDLIHLALKQCLIEPIRWELVEAELPRLLKARGGVDTVSIVPFATVLTKSLSAALTLEGVTVGEAQSTSAKIPERYSHRPGSDKSKLAIVSMSGRFPEAPSTDSFWDLLYKGLDV…
Eurotiomycetes	Aspergillus_protuberus_HOSP050413_4_129_GCA_021436995.1	SAT-KS-AT-xCP-xCP	MSSSTPSAIVCGSQTIPPSRETLDNLASYLAKSPNPELKAVREVLLALPELWAELKATEPQFQALSDEPIITFRDWFLRHDTGSEYEDDIYNLSHLKIHERLPNILLAPLTVIIHIAQYSQYLDGLGLDDSDDCHVHIRQSTSSRNTTDIGPKFQGLCIGSLSAAALDASPTRTALAQNATAAVKLALCIGAYVDSQRLADSGSSSYSEMACFIARWGADCCREMVEEMLSRYPEAYISVELDYNSITITAPSGDMPSLQEDLSREGVRVANVPVNGRYHHKPAGWFSDMSETINSITPSETQMPMTTLELGLVSCIPPSLAALPRHHIIRGSLSPPTQPYNYPDTSIAIIGAACKYPGANSLDELWNIFAAGQVMYGEAPPGRFGKETVAGNFLSDAD…
Eurotiomycetes	Aspergillus_protuberus_HOSP050413_4_129_GCA_021436995.1	SAT-KS-AT-xCP-xCP-MT-Red	MAPYTVLLFGPQALSFDEKSFAEIRDAVRNDPYNQWVIYVVSQLPETWATFVQKFPQLDVIKGRQSLGELIGWLSSGEVSPITRTLPNVLLSPLVVISQLTQFTQYLRIVHPDSGSSEDIYSSIGQETETVGFCTGLLSALAVATATSKAQFEQNAATAIRLATLIGAFVDAQETSNAHKASISLATAWNSLGAKQEMTNILNEFPEAYVSVLYDKNRATVTTAASSSKSLQDKLRAAGVVATEMNLVGRFHSNCYNDDIQQILDFCDANSTFQFPDASRLVTAIRSHDGSLITGGKLHHSALQSILVEQSYWYETFEAVHASRLGDKQTTVVGFGPERCVPPSLLRSVNDQVVYMINPESAKARLLQGNSKTKSSLKYPQGYSDNDIAVVGYSLKVAN…
Eurotiomycetes	Aspergillus_pseudoglaucus_E42_GCA_039880875.1	A-xCP-KS-AT-KR-xCP-Red	MQWGWSVTANFFAHTLVERGVGRGDLVGVALDRSVDLVVVLVAVLKSGAAYVPIDPAFPAKRMSQMMEDAAPKLVVASNGVLDALALWGGVCLSIDDMKKKMNLAADYKNLERDIREKDLAYVMYTSGSTGRPKGVEVSHRAVTNFVLSMQRQPGCSEEDRLLAISTISFDMAVYELFTPLVSGATAVIAQTHQLKDPGMLLGLMQHHAITILLATPTTWQMLLHAGWRGKPRLKTILSGGEGLPRHLTERLVDYSDTVWNAYGPTEATGCASLWRVRKGEDVLIGSPLANVRLYVLDTGLSSVPLGCSGELYIGGAGVACGYRNNSELTKSRFLRNPFHGGIMYRTGDLACFVAPQKLRVLGRADSQVKIRGYRIELGDIETAITDHGCISDAVVVDR…
Eurotiomycetes	Aspergillus_pseudoglaucus_E42_GCA_039880875.1	SAT-KS-AT-DH-xCP-MT	MKFCTEHSERGLRLLFGPQYSEIEDSITHIRGAIFKDPTALGFLSEILDELPSLWPVITGAWPALDQVSGERQLAALGQLVEDGLSASCEVEASNLILTPVTVMRHIVDFWNLQHVATHPALPSSSSSSSSSSLAAAPRVVDAQGFCVGILAAIAVACSRDTREFQAVAFNAIRLAVCIGALVDLDEIVSGNATSMAVRWESLEDYDHLERILTQDHNIYISCHTDVNSVTITLPDDTAQRVKQELSGPGLRAKQISLRGRFHHNQTHREGIQRIMKLCVKDPRFQLPRHDALLLPLRSNQDGGVIKEAAVLHTVALESILSAKANWWETVSALLNSAEMEVDGSRLLSIGSGEFVPRSARGRLVSRSGLLDVHERRGLTNGDTPAPSAVSLPNGTHTL…
Eurotiomycetes	Aspergillus_pseudoglaucus_E42_GCA_039880875.1	SAT-KS-AT-PT-xCP	MNTPSSSADVVNDHHYRLVYFSNELPSDEQIGAHLRRLQALSKDRRHPILKVFLDDATDVLRQELRKLPSNLLSLIAPFESIIDFAYQFGLRTRPFGGSTEGVFTCLIQLGAYISYHENPTNDPLTSPNGTLVALGSGLLAAAAVSFASRLPDLVKLGAEAIRIAFRMGLRVDQVSQRLEARRAEGPAESWAYVFSELSEDEVQKELATINASLNFPKPSQIFVSAVSPGSVTISGPPSRLKTLVRSSELLRYAKWAPLPVFAGLCHSAHVYTYADAEAILSATQLPTNSSYAPHTPLLSTRDGRPFAAQTPAQLFEDVIFELLTGTIRWDTVTATLHDRVALQFVPEVSVKALGAPNALKGFNETIQAHADPVRINTEDILVQSLATPLPERAPRDSK…
Eurotiomycetes	Aspergillus_pseudoglaucus_E42_GCA_039880875.1	SAT-KS-AT-PT-xCP	MKKVTGSVLLFGDYTEPWIESIDSLYKQAGSAPWLQSFLDDTVLVIKEQKKGAERFLQDCLGEFTDLKDLADRYRHTTDEISYVQGLMLYTIRAAYLLQWIQRDPSLLKTSEGLGFSGGLINASVLAIAQDFDTLYLACLEGLRLFCRSCRLAIVRSRAIEDRPGSWGWLVVGISASDLRSALDKFQNNMADEAGAEQGIPNTKRAKVGLMGDRWNTVIGPPSILEFIFRQCPAIKSLPKDKLNIHALQHALDLSEADLNYIVGDSPLVKGPVKPGFKLWGMDQPENTWESWADLLRVVMAKALAEPLDIVKVVSEFNGSLSLYSQVNIYNMALEGPSSHATYLVNVLKASGKSIKFQSGLGDDHVDSSPGGRIAIVGMAGQGPGCQNLEEFWNVISNA…
Eurotiomycetes	Aspergillus_pseudoglaucus_E42_GCA_039880875.1	SAT-KS-AT-PT-xCP-xCP-Te	MERLRRVYLFGDQTGDFDAGLRRLLHAKNSSLVTAFFQRCFYALRQEITKLPPSQRQIFPRFTSIIDLLARYRESGVNPALESALTCIYELGCFINYYGDLGHAYPSGYDSVIVGLCTGLLPSAAVSCSKTVGELIPIAVETVVLALRLGLCVHSVRKLVDRGTSSSSSWSTLVSGISEAEALDKIREFSSQKAIPPSSQPYVSAVSANGVTISAPPSTLDQLIQTSLSKNHKPARAPIHGPYHAAHLYDARDVERVLDSWPKDTFSSYVPQIPVLSSNTGSAIDTETIYMLLKVSVEEILLRQLCWDKVTESCVSKLKDTTSPACTLVPISSPAIQSLYTTLKKAGITNIDVNSSLGDIPNEPNGFSTTGRSEHSKIAIIGYSGRFPEATDPEEFWDL…
Eurotiomycetes	Aspergillus_pseudoglaucus_E42_GCA_039880875.1	SAT-KS-AT-PT-xCP-xCP-Te	MAPLEVFVFGDQTVAFESTLHWLLHVKDDVLLKDFFDRVGFQLRRHVSSLPAHQKAWFPLFTTLLDLFDEHERAYAAPALKFALLCATEIGQFIRHLVQTARPYPAAARTYLVGACTGSFAAAAISTSQTLLELIPVAVETVLISLKLGLRSLVVRHDIEASVAGEPKSWSALVDVQVAEAVDKITAFNTEKSLSPVSQLYISSLSHTSVSISGPPRLLAPFLSSTGWRHLFLPIELPYHAPHLFQSSDLEDVVGEFNDKSLQSYKQRMKIISISSGNVLDSCDFKDLLREAALGALSEPMRWDSVISSLSTGIRQLEFTDCIVHQISSVNTIDSPKEVLPGTGFNTTGKVAQSNIAIIGYSGRYPDSASNEEFWDLILAGRDVHRTIPEDRFDWEAHY…
Eurotiomycetes	Aspergillus_pseudotamarii_NRRL_25517_GCA_030324235.1	SAT-KS-AT-DH-xCP-MT	MTGGTQLVLFGPQLTPTQWTPDFLRRLQLEMQNNPQLEFLRHCLIQLEAFVASTPLPREDVALVSQLGTLAGFARGEAIPDPQRLQGNILLAPLTIVSQVVDWLRMTPSDELIVQGFCIGFLSAAVVSSTHQQDRVEFERYVANSIRLAACIGFLIDREDSLQATADQATAISVRCPSPSHRAALETTIDSFPETYISCITDDRTVTVTLPRRHLARLTERLKHESIPSTVIGLDGCYHHPKHTDAAQTLKDICAKTRELQLPFSEQLHLPLRSTADTELLTMGALHDIAVDLILCKRAHWFQTVKCTLKEVPNGVKFVAVGSESCIPRSLSLARPAADLQDAIAVVGMACRFPQADSLEEFWQLLSAGETTISPLPHNRFNPADLRREPKPSTFWGNF…
Eurotiomycetes	Aspergillus_pseudotamarii_NRRL_25517_GCA_030324235.1	SAT-KS-AT-PT-xCP-Te	MAQSRQLFLFGDQTADFVPKLRSLLSVQDSPILAAFLDQSHYVVRAQMLQSMNTVDHKFARTADLRQMVQKYVDGNLTPAFRTALVCLCQLGCFIREYEESGNRYPQPSDSYVLGFCMGSLAAVAVSCSRSLSELLSIAVQTVLIAFRLGLCALEMRDRVDGCSDDRGDPWSTIVRGLDPQQARDQIGVFCQTTNVPQIRRPWISCISKNAITLSGSPSTLRAFCAMPEMSQHRTTPIPICLPAHNGGLFTQADINAILDTTPTTPWEQLPGQIPYISHVTGNIVQTTNYRDLMEVALSETLLEQVRLDLVETGLPRLLQSRRVKNVTMVPLLTRMNETMSDILRDSFITTETRTNTGRAIPASGRPGAGKCKLAIVSMSGRFPESPTTESFWDLLYKG…
Eurotiomycetes	Aspergillus_pseudotamarii_NRRL_25517_GCA_030324235.1	SAT-KS-AT-PT-xCP-Te	MVVEERKQIIVFGDLTCDSVAGLRSLATIKENPLLISFFEKVTSGLREEIGLLPFSSRQQFIRFTTFEELLARVQRSTCPHPALEKALACTYQLACFIRRYTSPGQKYPSTHQTCLVGLCTGLLSAAAVGCCESITDLLPLATNTVQIAFRAGLFVADVRDRLEPQTGPPLAWSVLIPGLDGDTAVSILERYNEEKGLPATSAPYISTYANTGVTLSGPPSALNDLLNSGCFPKSRSLTIPIYAPYHASHLYGQKDVDNILRKTLPTQFTSQVCQFRVLSSITGHSIKVNAYGALIGHALNEVLREPLRLDRIVSSLGEVLLTDTSARGCTILPIATLVGQSFATALRKYGAPDITVDPCMNSSVAVRDDRTSTTGHLGYSKLAIIGYSGRFPDANNNE…
Eurotiomycetes	Aspergillus_pseudotamarii_NRRL_25517_GCA_030324235.1	SAT-KS-AT-PT-xCP-xCP-Te	MEGPRGVYLFGDQTSDFDAGLRRLLQVKNNTIVASFFQRCFHALRQEIARLPPSERKIFPRFTSIVDLLARHRESDPNPALESALTCIYQLGSFINYYGDLGNVYPSASECHIIGLCAGLLSSAAVSSATNVGELLPAAVEAVVIALRLGLCVLKVRELVSSDQASSTSWSVLVSGISEKDASKVIGEFTVERAIPPSSKPYISAVGYNSITISAPPKVLDDLIGTRLSKSHKPVRAQIHGPYHAAHLYDSRDVDRILESCPNEAVSNYTPRIPVLSSTTGKPIEAKQMKDLLKAALEEILLRQLCWEKVTDSCSSILKTARHQTCKLFPISSTATQSLFTALTKAGITNIEVENGLGDISTTPKDNLNISGRADCSKIAIIGMSGRFPESDGTENFWD…
Eurotiomycetes	Aspergillus_pseudotamarii_NRRL_25517_GCA_030324235.1	SAT-KS-AT-PT-xCP-xCP-Te	MEELTRSLVNDVEVLSDHLASTGHPLPSFDRHTPIVVLPNGASPDAHAARERILDNALHLFQLAAGPSAYLLNLQTGYHYASCVRWLCHFRIFHLVPLEGSIAYADLAILAKAPECQLRSVVRMAMTSGLFLESPSQHVSHSATSALLRNDADFHDWAVTMSDLSVPAAFAMVEAHERWPDSVEGSHTAYNIAVDTELPFFQHLAEHPDRKRQFAGFMRSMARSQGTEAEKLAEGWDWTALGQACVVDVGGSTGHTSVALARKFPDLNFVVEDLPEVVAEGPEYLSSLNDTQDLRPRISYRAHSFFDPQPVQDADVYMLRMILHNWSFADCVRILSRLVQTLKPGARILIVDIVLPDPGVIPASKERLLRVQDLIMRQVFNSMERHLENWMDIFKRVDE…
Eurotiomycetes	Aspergillus_pseudotamarii_NRRL_25517_GCA_030324235.1	SAT-KS-AT-xCP-MT-Red	MSETLVITCPSGKQCSRLIPLLYNKGKFHLRLAAHSETSAQKLKANYPDADVVTADLQSVSDCRKLLHGATAINAVLPSLHSHEKEIGFNLIDAAVAESRREGNVFKHFVFSSVLGTQHRNLLQHDLKSYVEERLFLSPLDCWTILKPTNFLDAYPVAALAAQENPVLEKWWKPEHENSVIALADLAEASAKVLNEREEHYLAEYPLCSTMPISETEIIQIIERRIGKKIELKTPSFDTGVNKLIRALYGGEEKGDGELGLGLASEGDLRGDLTQNLNSFIPPFDPAFNMVNPSPNTKSESLTLVFGPQDPNLDNSLLHTLRTTLLETPELQWIIETLTQLPQEWQKISDAHPELGAFQGQRYLQLLNEWVRRGILPSNLFPLPNILVTPLVVTTQLAQ…
Eurotiomycetes	Aspergillus_pseudotamarii_NRRL_25517_GCA_030324235.1	SAT-KS-AT-xCP-MT-Red	MASQLEPQAGGNTVLIFGCQCVSFNVEDFLRLRATVLDTPEHRWIQDVLSELPVYYRTAATTYVQKLKTIPGTEQLRDLAEWFRTGQVPTDSFPLPYIQLAPLLMVTHFTEYWHYLRLRHPKGPTCASDLSAKSKVVEIAGFCIGFLSAAVVSAASNQEELSKYAAVALRLATLMGALGDAQEREEEYTSLATVWKGVDIGKRLPSVLETFPESYVTVRFDTNRVTIMTPRRTINQLEQELQQAGFVTTKVEFNGRYHWAGHEDTLHALSRMCDSDPTLQLPDATQSVVPTRPNMAMGSPKGPLHELVLRSILAQQCQWFDTFSKVYQAHLEDTPSLIVEFGPERCIPPTYMRKLQGRTVHFADLDLNPVSRTSPLHQTPRTYDSDIAVVGMACRVAGA…
Eurotiomycetes	Aspergillus_pseudoviridinutans_IFM_55266_GCA_018340605.1	SAT-KS-AT-DH-xCP-MT	MLSLAADSLPSLLVFGPQTEFPSDQVLQGLRQELISSPQLSALKAAVDELPQFWQGLIDFDPSLRQVPGGKYLADLKQWVKDGGPFPNHQSNAPNHYGLTVTVLLQIIQYSRYLGQLGKDAHRKVLNSVKIGGIQGFCVGFLSAVAVASSRSEEDIGPSAATALRLAVCIGAYVDLDGICSPAATEYVAVAIRWREGDAEKAAKFIQAIPNAYISSINDEASVTVTIRADDRDGLIDKARENNLRTKDVHVYGRFHTHDHSHAADKLTKLVAFSKGLQFPDAEELQVPVRNTADGGIISGSSLTLFALENTLVNVADWYATLRASIQQLPTSNQNIAFAGFGSCIPASIAQKSGVRVLALSNLEETKTKREEVLDDGHVNGHVNGHVNGVNRVQDIQNT…
Eurotiomycetes	Aspergillus_pseudoviridinutans_IFM_55266_GCA_018340605.1	SAT-KS-AT-DH-xCP-xCP	MALALPSIIVCGSQTPPPSRECLQRIRSNLKNPKLKELAKAVDDLPQFWSRLVEIKPVLSQVNDEPLQKLKDWVGDECFLEIPKDLPNILLAPLTVITHLVQYLRFVHSLDADDSQEDRHRRILQSTCKGGFQGLCTGFLSAAALACSRTDRDIWCNATVALRLATCVGGYVDLDRLTFDSTDVYVCMIIHWEDNCGKDRVTEVLKGYPGVYTSVELDDRNITVTAKQSQVSSLRADLAARNAKVTNIPIHGRYHSITHAEILQDLLEICNNDESLRFPVINPPLVPLRNNTTGDPITSAEKLHELALQSVLTKPANWYSTMTETISSLKLQPEKNHRPLILELGLVSCLPRSLTASANLQVFSPPLTSTVSPKEQKPSTNDEYCYDYPEHSIAVIGAA…
Eurotiomycetes	Aspergillus_pseudoviridinutans_IFM_55266_GCA_018340605.1	SAT-KS-AT-PT-xCP	MATPRGQTVWFGNEFPTDDLKDLFRRLHQHSKDRRFRLLSVFLDESTAILKEEVANLPQQLQELVPHFDTACTLAEVDFRQGALGAAMESALLTILELGMLIGNYEAQDIEWDLDPSQTILAGLSIGILAGAAVALSSSLADVAKVGAESVRVSFRLGVYVADVSTKLEAPQSDGTLQSWAHVVTGMSHEAVQEEISQFNAVTQNPELTKVFVSAADKTSVSVTGPPSRIKAAFQHSPSLRYSKSLPLPVYDGLCHAPHLYSQDDIDTVINSAKSVIPSSRPVRLPLISSQTGKPFEAKTAGELFLEIGTELLTGTIYLDNVTAGILEHVKLKEPTGSYQITSFRMSQVLKGILTAIETDFPALGWVRRDLVSWVHGDYGARRPSSYAASKLAIVGMAC…
Eurotiomycetes	Aspergillus_pseudoviridinutans_IFM_55266_GCA_018340605.1	SAT-KS-AT-PT-xCP	MGESIMNIHNNASRKMKLIYFSNEFPQDDLQTVFRKLHTHSKDRRHPTLARFLEEATLAIREEVRRLPTTLRALIPPFESILNFAEFTDLRKGQLCGSIDGILLCVLELGTLIGYYENHEDAFNSDPASIALAGLGIGLLATAAVSIAITVADLAITGAQVVRQAFRLGVLVDEVSQNLEPRDTTEGSSPDTWAHVMPNVSVDEVQHELDAIQAKEKTPEPSKIFISARSTTSVTISGPPSRLQAMFRTAKFFHEHKCIALPVYGGLCHAEHIYTQDNVRSVVRTRSMELVNAKFVPRLPVYSTSTGRPFPVSSATDLFESIIAEILTKAIEWDRVTQGVAQLAQDLNATECQLVVFRISLPIRDLAAALKNGSDVETSTKEIMPWVHQEEESDEGGPR…
Eurotiomycetes	Aspergillus_pseudoviridinutans_IFM_55266_GCA_018340605.1	SAT-KS-AT-PT-xCP	MKQKAPKSMGTVTAAIGLGLIGREKIDRPGGRPKYIDRALFRPKARQTLTSEHGMPCWGSRHGQHIDMSREIEPVIAATMRPADFTPSSESPTAEKGMKVVYFGNELPHDGLQGVCRRLHAYTKDRRHPLLAQFIEESTWAVRDEVRQLHAAQKALVPPFESVLHLAEQPELCKGPLCGSIEGVLLCAIQLGTFIGYYEASPNEYVFDSAHTYLTGLGLGLLASTAVSVSPTLADLPLAGAEVVRVAFRLGVLVADVSQNLQPADATGDQGSWAYVIPNVAPKEAEEELTAIHTRENTPEASRIFISAISRTSVTISGPPHRLKRLFRMSDFFRDRTFIALPVYGGLCHAKHIYSSQHALSVVESPSTAALDTRFIARYPVLSTSCGEPFPTATTAREL…
Eurotiomycetes	Aspergillus_pseudoviridinutans_IFM_55266_GCA_018340605.1	SAT-KS-AT-PT-xCP-xCP-Red	MADHLELFLFGDQTYNPQPCLREMMRNRHNPALESFLSKSYDAIRAEIYSLPHEVRTDMPRLTCLDDLILWKQDGQQCIPLDMALTCMYQLGAFISKTEAGCYPTQDSAVLGICIGALAAAAVSCSRSTLELIPTAVDAVVIAFRIGKLVADITRTLEPLHAPVQSWSTFIRGLTSAEAVRKFREQTVLPLTRQPYISAFTPSGITVSGPPSSLSQMTSSSTFKDFRLESINIYGPYHATHLYSQNDVEAIVGSLAPRGSDARRQMLLLSSTETPVRAGGLDAVWRAAIEQILLQPICWSSIFDQLQATHQKVSPKTIRITPIGTKADQLIYTALRQTPLCKALSMPERSPKAEPQTPYSNPGKSKLAIVGMSGRFPGANDIEAFWDLLYQGLDVHKPV…
Eurotiomycetes	Aspergillus_pseudoviridinutans_IFM_55266_GCA_018340605.1	SAT-KS-AT-PT-xCP-xCP-Te	MHRPIQVERLNLVVLGDQTNNVSALLKKLLLGAPYSVAQSEFIRDASAALRAQSDRLRPFQREHLPGFTTIHDLARIYEESNGEFTNPYFEGRGRRPENNEHIAVVGLCTGSLVAAAYATSASLDDLKLLAVPTVSMAFQMGLQAATASNMLHEQGNPLGSWSIAIPKMTEDEALSALKIYDAGGHLSLRHRCFVSAVGLKSVTISGSPPALGRFAESLTASQPSRKIIWLPVFAGYHASHIHTVLDFPSFLSRCGIDADLLSSFKSIKTLLSPLTGEPVDSNSALDLFKTVVHHTLQAPLRLDLIVDRCAFLIRENAIASVRIDAVGPTPVADSLAAALRNRTSANISTRELVVLEPGVDQYKPSAAFSQAPLAIVGMSGRFPGAESAEALWSLLESG…
Eurotiomycetes	Aspergillus_pseudoviridinutans_IFM_55266_GCA_018340605.1	SAT-KS-AT-PT-xCP-xCP-Te	MSITHILAFPHQHADLLGAMYDMNVRSKTRSQLRIFLSAAAAVVREHVDSLDGPERARVGSFEDLVDLAERFAKQDHPSAVAEIVLFTIVQMGQLLILAEDNSSILSGTTGDVVLPVGFGIGLIAASIAATVTSTDAIIALGLQGIGIAVRLAIALERTGRAIQDSNGIWARAVPGISQRGLEQELEIVNSTLGPLHQAYVGQVLPGSVVVFGPPSTLDTLTQGPDLASVVTMPDTLCRCPMYGSHLPPLDVGQVVGVSGLLELYQVKRPLYSAHSSTGSLPASTLTELLRRVVVEIAHKPMHIEKTVSTLAAAIEASTKDDAVLTTVGSTWDASTMQDLLLQHGQTVSLGEFPSCPAPFGSNLDSIPPDAIAVVGMSGRFPESDTLDEFWRLLETGTT…
[truncated: 2,538 more rows]
